# Supplementary material for: Mycobacterium tuberculosis PknK Substrate Profiling Reveals Essential Transcription Terminator Protein Rho and Two-Component Response Regulators PrrA and MtrA as Novel Targets for Phosphorylation
Source: PubMed Central journal article supplement (PMC9045387; doi:10.1128/spectrum.01354-21), 2022-04-11
Supplement: spectrum.01354-21-s0001.pdf [file spectrum.01354-21-s0001.pdf]

## **Supplementary Methods.**

### **2-Dimensional Differential Gel Electrophoresis (2D-DIGE).**

2-D DIGE was performed by Applied Biomix, Inc (Hayward, CA). Briefly, the cell pellets were washed with Washing Buffer (10 mM Tris-HCl, 5 mM magnesium acetate, pH8.0) three times. 200  $\mu$ l of 2-D cell lysis buffer (30 mM Tris-HCl, pH 8.8, containing 7 M urea, 2 M thiourea and 4 % CHAPS) was added. The mixture was sonicated at 4°C followed by shaking for 30 minutes at room temperature. The samples were then centrifuged for 30 minutes at 14,000 rpm and the supernatant was collected. Protein concentration was measured using Bio-Rad protein assay method. For CyDye labeling, 30  $\mu$ g of protein of each sample was mixed with 1.0  $\mu$ l of diluted CyDye and kept in dark on ice for 30 min. Samples were labeled with Cy2, Cy3 and Cy5 respectively. The labeling reaction was stopped by adding 1.0  $\mu$ l of 10 mM Lysine to each sample and incubated in dark on ice for additional 15 min before mixing the samples together. IEF and SDS-PAGE was done on (pH 3-10 Linear) as per the manufacturer's instructions (Amersham BioSciences). Upon finishing the IEF, the IPG strips were incubated in the freshly made equilibration buffer-1 (50 mM Tris-HCl, pH 8.8, containing 6 M urea, 30% glycerol, 2% SDS, trace amount of bromophenol blue and 10 mg/ml DTT) for 15 minutes with gentle shaking. Then the strips were rinsed in the freshly made equilibration buffer-2 (50 mM Tris-HCl, pH 8.8, containing 6 M urea, 30% glycerol, 2% SDS, trace amount of bromophenol blue and 45 mg/ml DTT) for 10 minutes with gentle shaking. Next the IPG strips were rinsed in the SDS-gel running buffer before transferring into 12% SDS-gels. The SDS-gels were run at 15 °C until the dye front running out of the gels. Gel images were scanned immediately following the SDS-PAGE using Typhoon TRIO (GE Healthcare). The scanned images were then analyzed by Image Quant software (version 6.0, GE Healthcare), followed by in-gel analysis using DeCyder software (version 6.5, GE Healthcare). For Phospho-staining, the gel was then stained using Pro-Q® Diamond Phosphoprotein Gel Stain following manufacturer's

protocol (Invitrogen), followed by scanning using Typhoon TRIO (GE Healthcare) and analysis using DeCyder software version 6.5 (GE Healthcare).

### **Protein identification by Mass Spectrometry.**

The spots of interest were picked up by Ettan Spot Picker (Amersham BioSciences) based on the in-gel analysis and spot picking design by DeCyder software. The gel spots were washed a few times then digested in-gel with modified porcine trypsin protease (Trypsin Gold, Promega). The digested tryptic peptides were desalted by Zip-tip C18 (Millipore). Peptides were eluted from the Zip-tip with 0.5  $\mu$ l of matrix solution ( $\alpha$ -cyano-4-hydroxycinnamic acid (5 mg/ml in 50% acetonitrile, 0.1% trifluoroacetic acid, 25 mM ammonium bicarbonate) and spotted on the AB SCIEX MALDI plate (Opti-TOF™ 384 Well Insert). MALDI-TOF MS and TOF/TOF tandem MS/MS were performed on an AB SCIEX TOF/TOF™ 5800 System (AB SCIEX, Framingham, MA). MALDI-TOF mass spectra were acquired in reflectron positive ion mode, averaging 4000 laser shots per spectrum. TOF/TOF tandem MS fragmentation spectra were acquired for each sample, averaging 4000 laser shots per fragmentation spectrum on each of the 10 most abundant ions present in each sample (excluding trypsin autolytic peptides and other known background ions). Both of the resulting peptide mass and the associated fragmentation spectra were submitted to GPS Explorer workstation equipped with MASCOT search engine (Matrix science) to search the database of National Center for Biotechnology Information non-redundant (NCBI nr). Searches were performed without constraining protein molecular weight or isoelectric point, with variable carbamidomethylation of cysteine and oxidation of methionine residues, and with one missed cleavage also allowed in the search parameters. Candidates with either protein score C.I.% or Ion C.I.% greater than 95 were considered significant.

### **Microarray Sample Labeling and Hybridization.**

Microarrays were performed by Genotypic Technology Pvt Ltd, (Bangalore, India). The samples were labeled using Agilent Quick Amp Kit (Part number: 5190-0444). 500ng of total RNA was reverse transcribed using Random hexamer primer tagged to T7 promoter sequence. cDNA thus obtained was converted to double stranded cDNA in the same reaction. Further the cDNA was converted to cRNA in the in-vitro transcription step using T7 RNA polymerase enzyme and Cy3/Cy5 dye was added into the reaction mix. During cRNA synthesis Cy3/Cy5 dye was incorporated into the newly synthesized strands. cRNA obtained was cleaned up using Qiagen RNeasy columns (Qiagen, Cat No: 74106). Concentration and amount of dye incorporated was determined using Nanodrop. Labeled cRNA was cleaned up and quality assessed for yields and specific activity using Nanodrop.

The labeled cRNA samples were hybridized on to an Agilent Custom *M. smegmatis* 8x15k Gene expression designed by Genotypic Technology Pvt. Ltd. (AMADID: 043029). 1000 ng of Cy3 labeled samples and 1000 ng of Cy5 labeled samples were pooled. Fragmentation of labeled cRNA and hybridization were done using the Gene Expression Hybridization kit of Agilent (Part Number 5190-0404). Hybridization was carried out in Agilent's Surehyb Chambers at 65° C for 16 hours. The hybridized slides were washed using Agilent Gene Expression wash buffers (Part No: 5188-5327) and scanned using Agilent Scanner (Agilent Technologies, Part Number G2505C).

### **Feature Extraction and Microarray Data Analysis.**

Data extraction from Images was done using Feature Extraction software Version 10.7 of Agilent. Feature extracted raw data was analyzed using Agilent GeneSpring GX Version 11.0 software. Normalization of the data was performed in GeneSpring GX using Lowess Normalization. In two-color experiments, where two fluorescent dyes (red and green) have

been used, intensity dependent variation in dye bias may introduce spurious variations in the collected data. Lowess normalization merges two-color data, applying a smoothing adjustment that removes such variation. Significant genes up regulated fold  $> 1.0$  ( $\log_{base2}$ ) and down regulated  $< -1.0$  ( $\log_{base2}$ ) in the test samples with respect to control sample were identified. A Dye-swap experiment was performed to nullify dye biasness. Statistical student T-test p-value among the replicates was calculated based on volcano plot algorithm. The clusters of orthologous groups (COG) annotation classified all the genes into major functional and sub-functional categories (<http://www.ncbi.nlm.nih.gov/COG>). The Clusters of Orthologous Groups of proteins (COGs) database has been designed as an attempt to classify proteins from completely sequenced genomes based on the orthology concept. Heat maps were generated for the COG based functionally classified differentially regulated genes using Agilent GeneSpring GX Software.

### **Protein Purification.**

Primary culture inoculum for the recombinant plasmids was inoculated in 400 ml of 2XYT broth and grown at 37°C, 200 rpm till O.D 600 reached ~0.5-0.6. Then the culture was kept in 4°C for 30 min, followed by IPTG induction at final concentration of 0.1mM - 1mM and incubated for 16 h at 16°C on constant shaking. Cells were harvested by centrifugation at 3500 rpm for 10mins at 4°C. The pellet of PrrA and MtrA were resuspended in 10 ml of native lysis buffer (50 mM Tris-HCl, pH 7.4, 500 mM NaCl, 10 mM imidazole, 10% glycerol) containing 1 mM PMSF and 1 mM Benzamidine, sonicated on ice for 10 min at 50% amplitude (pulse on 2s, pulse off 1s). Then the slurry was centrifuged at 12000 rpm for 30 min at 4°C. The supernatant containing the protein was loaded into the Ni<sup>+2</sup>-NTA column pre-equilibrated with native lysis buffer at 4°C. After 45 min of incubation with intermittent shaking, the unbound proteins were discarded as flow through followed by washing the column with wash buffer (50

mM Tris-HCl, pH 7.4, 500 mM NaCl, 20-40 mM imidazole, 10% glycerol). The protein was eluted by using the elution buffer (50mM Tris-HCl pH 7.4, 500 mM NaCl, 250 mM imidazole, 10% glycerol).

The cell pellet of PknK was resuspended in 10ml of lysis buffer (50 mM Tris-HCl, pH 8, 100 mM NaCl), containing 1mM PMSF and 1 mM Benzamidine, sonicated on ice for 10 min (pulse on 2s, pulse off 1s) at 50% amplitude. Then the sonicated solution was centrifuged at 12000 rpm for 30 min at 4°C. The supernatant containing the target protein was loaded into the Glutathione sepharose-4B column pre-equilibrated with lysis buffer at 4°C and incubated for overnight. The unbound proteins were discarded as flow through followed by washing the column with wash buffer (50 mM Tris-HCl, pH 8, 100 mM NaCl). Then the proteins were eluted by using the elution buffer (50 mM Tris-HCl, pH 8, 200 mM NaCl, 5 mM EDTA, 5 mM DTT, 10 mM reduced glutathione and 10% glycerol).

The eluted fractions of proteins were pooled together and dialyzed against the dialysis buffer I (50 mM Tris-HCl, pH 8.0, 50 mM NaCl, 0.1 mM DTT, 10% glycerol) for 6 h and the with dialysis buffer II or storage buffer (50 mM Tris-HCl, pH 8.0, 50 mM NaCl, 0.1 mM DTT, 50% glycerol) for 12 h. The protein concentration after dialysis was calculated by Bradford assay using BSA as standard and purity of the proteins were checked on SDS-PAGE. The purified proteins were stored at -20°C.

Figure S1

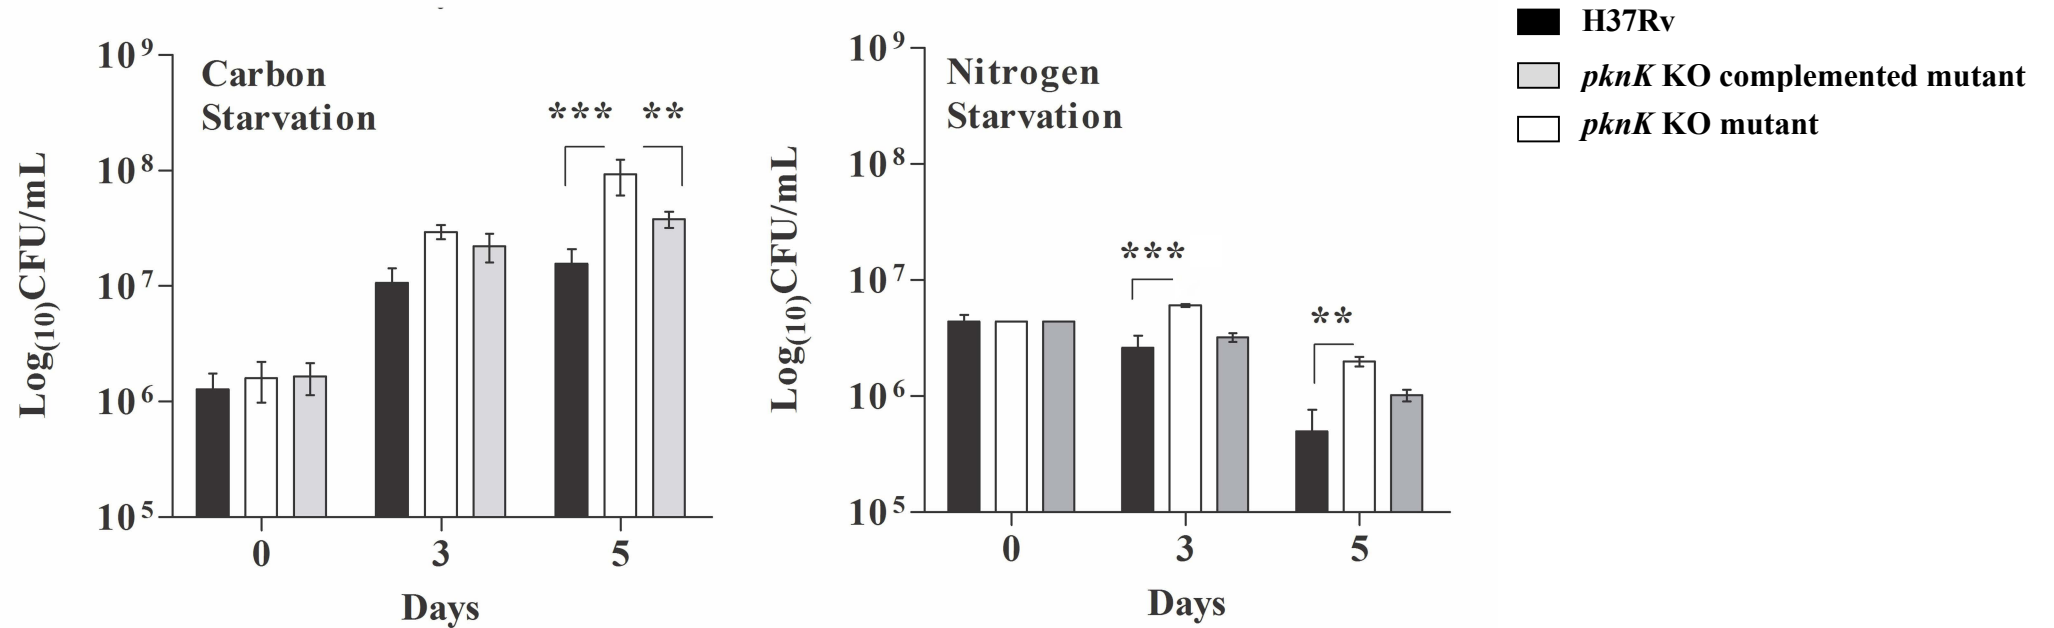

**Figure S1. PknK facilitates survival under carbon and nitrogen starvation growth conditions.**

The viable counts of *M. tuberculosis* H37Rv (solid black), PknK mutant (solid white) and PknK complemented mutant (solid gray) were determined at 0, 3 and 5 days post exposure to carbon or nitrogen stress. The average mean  $\pm$  SD counts obtained from three independent experiments are shown. \*\*, \*\*\* represent  $P < 0.01$  and  $P < 0.001$ , respectively, for the differences in the growth of mutant compared to H37Rv or complemented mutant in carbon and nitrogen-limiting media at the indicated time points.

Figure S2

A. VC / WT<sub>OE</sub>

B. VC / Mut<sub>OE</sub>

C. WT<sub>OE</sub> / Mut<sub>OE</sub>

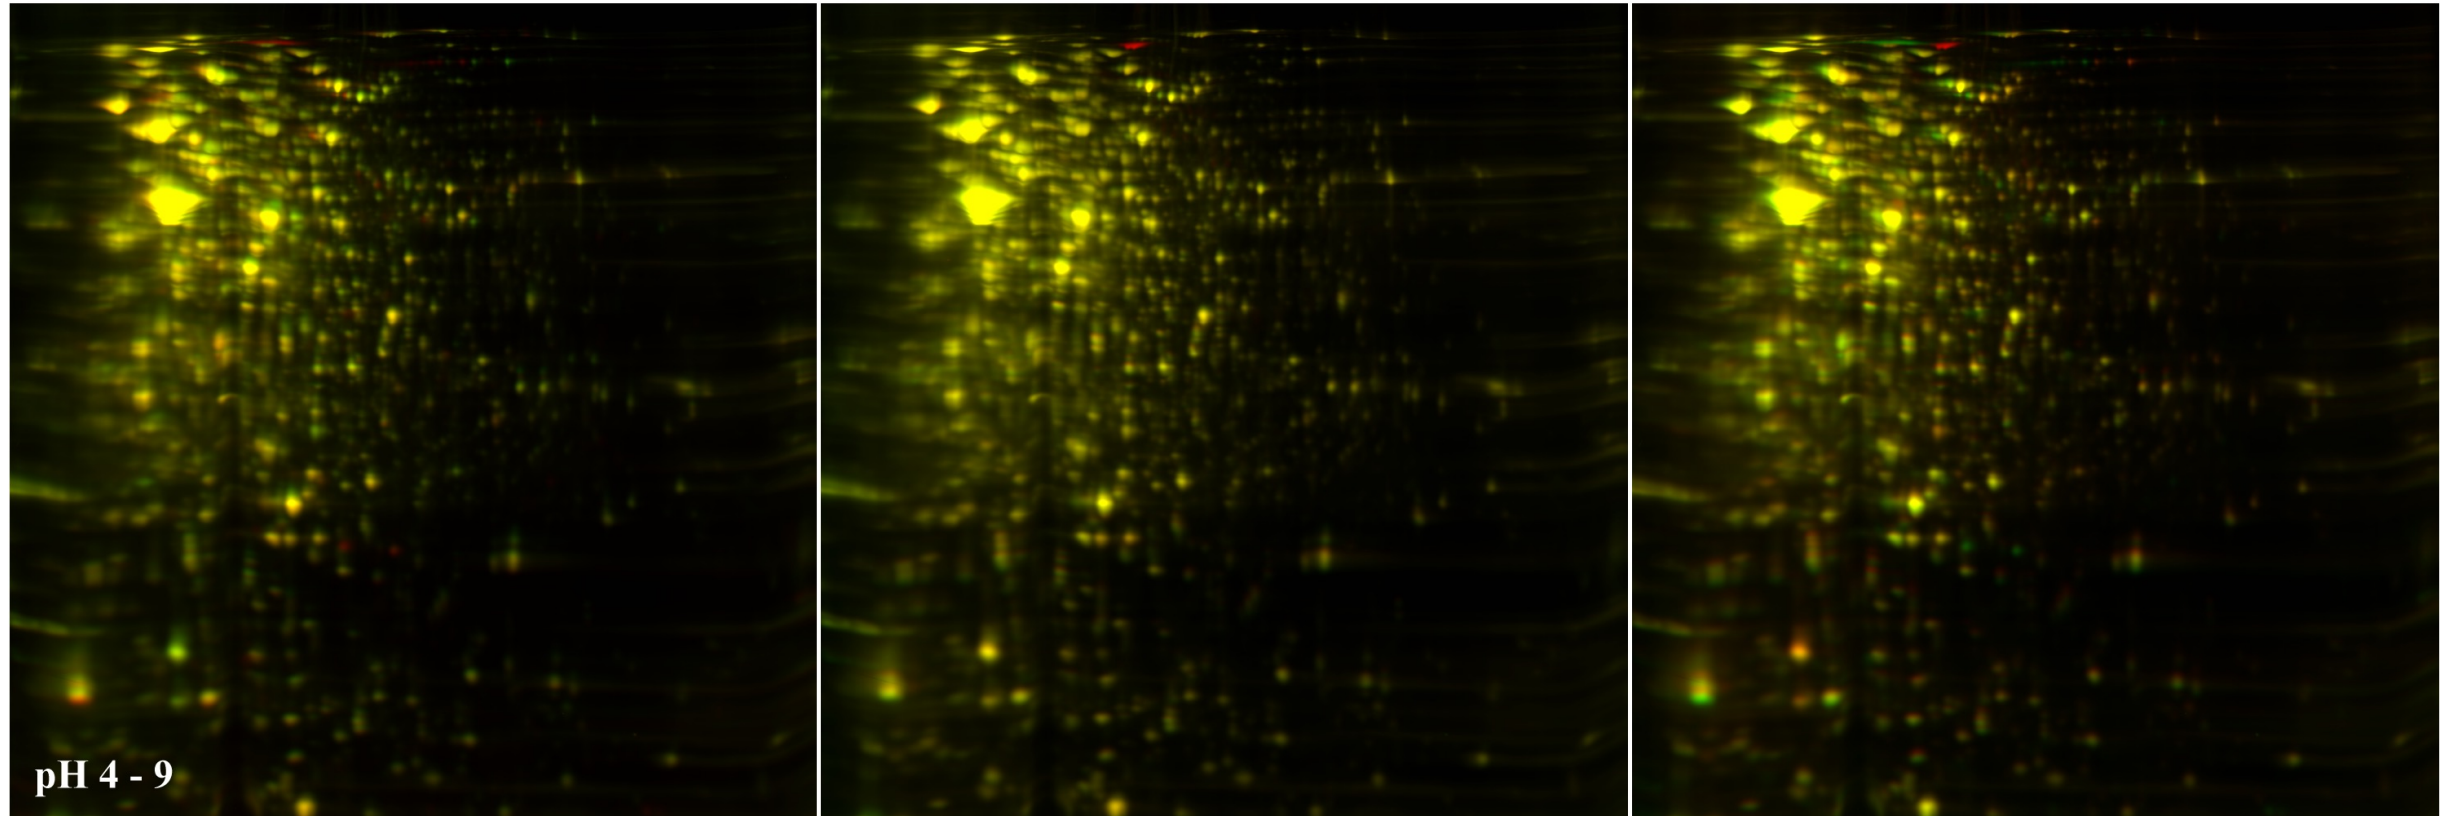

**Figure S2. Differential protein profiles as a result of overexpression of wild type and Phosphorylation-defective PknK by 2D-DIGE**

The cells were grown, induced with acetamide for 4 days and pelleted for 2D- DIGE analysis. The images were captured and overlaid to enhance the identification of differentially expressed proteins in the strains WT<sub>OE</sub> and Mut<sub>OE</sub>.

VC = *M. smegmatis* with empty vector (pJFR19)

WT<sub>OE</sub> = *M. smegmatis* with pJFR19-PknK<sub>Mtb</sub> (wild type PknK)

Mut<sub>OE</sub> = *M. smegmatis* with pJFR19- K55M PknK<sub>Mtb</sub> (phosphorylation-defective PknK)

Figure S3

A. WT<sub>OE</sub>

B. Phosphostain

C. WT<sub>OE</sub> / Phosphostain

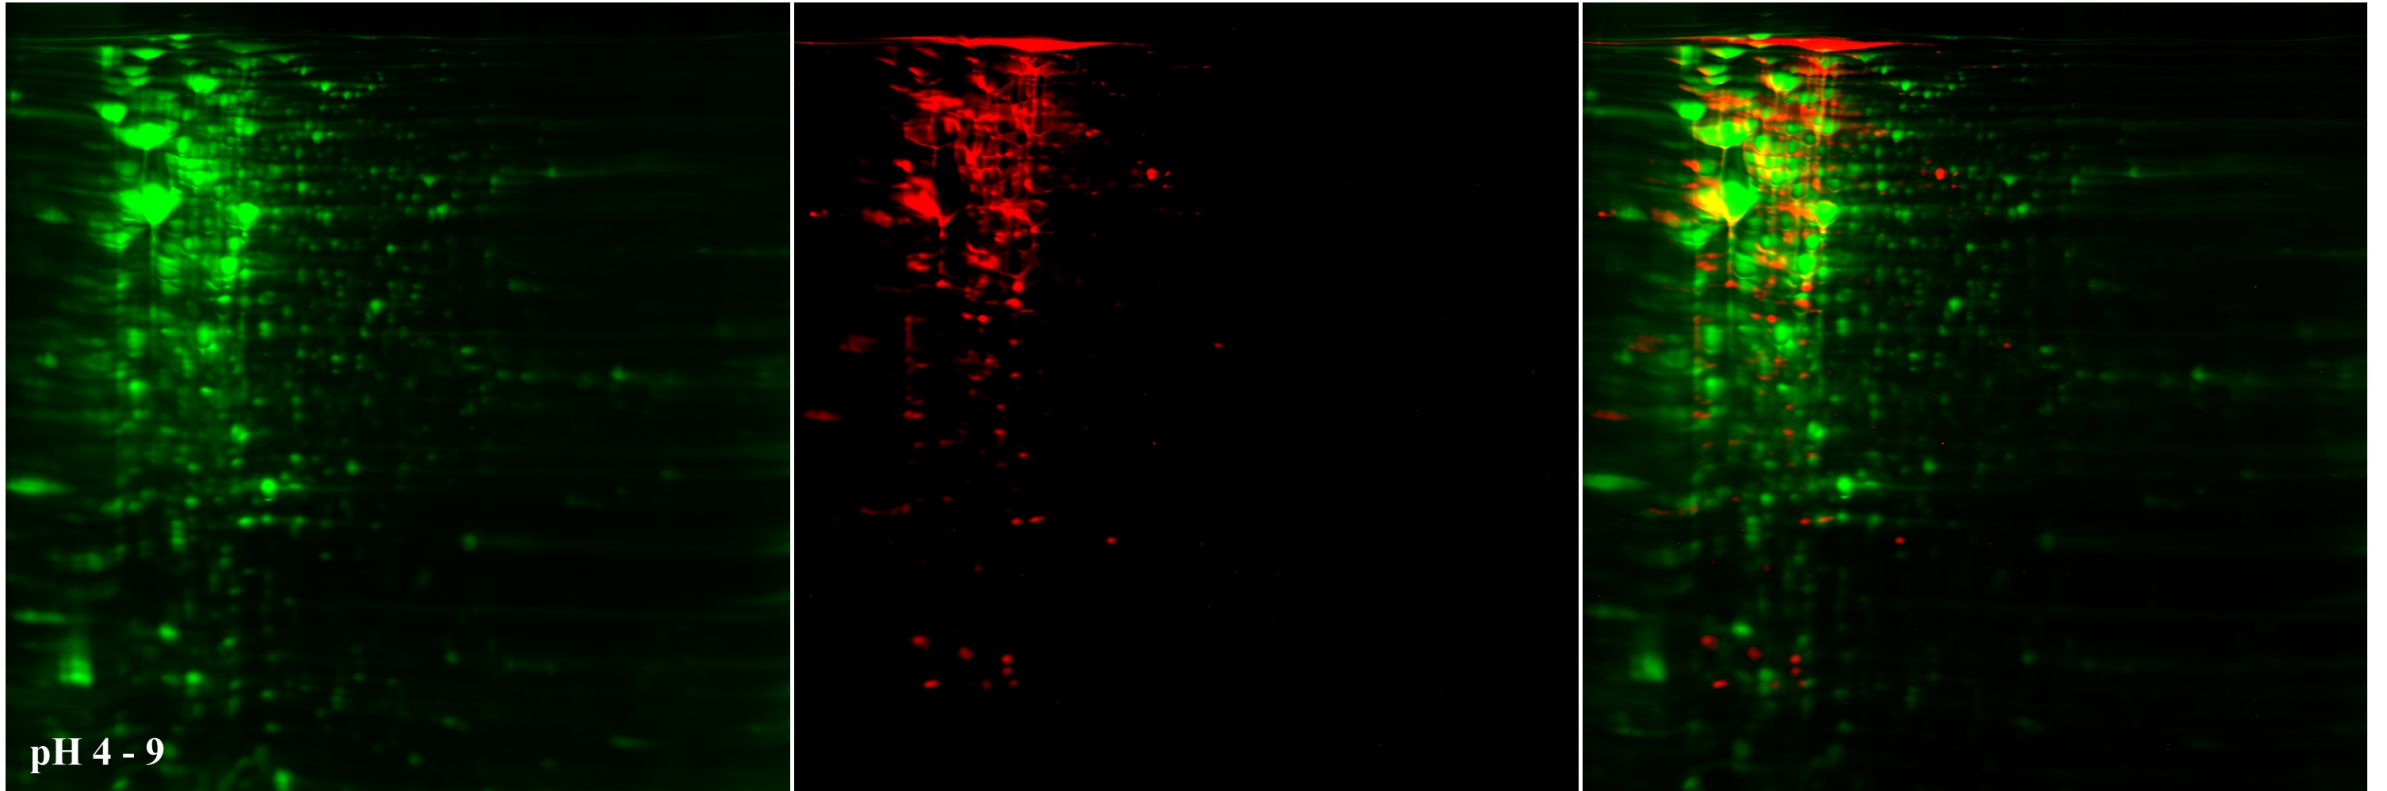

Figure S3. Phosphoprotein staining of 2D-DIGE profile of WT PknK overexpression strain

The 2D image of WT<sub>OE</sub> sample was overlaid with a phosphostained gel image to mark the proteins that are phosphorylated by WT PknK. ProQ phosphoprotein stain was used to identify the phosphorylated proteins as per instructions of the manufacturer.



**Table S1. Strains and Plasmids used in the study**

| Strain/Plasmid                          | Description                                                                                                                                               | Source/Reference                                                        |
|-----------------------------------------|-----------------------------------------------------------------------------------------------------------------------------------------------------------|-------------------------------------------------------------------------|
| <i>M. tuberculosis</i> H37Rv            | Virulent laboratory strain                                                                                                                                | ATCC 25618                                                              |
| <i>M. smegmatis</i> mc <sup>2</sup> 155 | <i>ept-1</i>                                                                                                                                              | Dr. William R. Jacobs, Jr, Albert Einstein College of Medicine, NY, USA |
| <i>E. coli</i> JM109                    | e14- (McrA-940) <i>recA1 endA1 gyrA96 thi-1</i><br>941 <i>hsdR17 supE44 relA1 (lac-proAB)</i>                                                             | Stratagene                                                              |
| <i>E. coli</i> XLI-Blue                 | <i>recA1 endA1 gyrA96 thi-1 hsdR17 supE44 relA1 lac</i><br>[F' <i>proAB lacIq ΔM15 Tn10 (Tet<sup>r</sup>)</i> ]                                           | Stratagene                                                              |
| <i>E. coli</i> Arctic Express           | B F <sup>-</sup> <i>ompT hsdS (rB<sup>-</sup> mB<sup>-</sup>) dcm<sup>+</sup> Tet<sup>r</sup> gal endA Hte</i><br>[ <i>cpn10 cpn60 Gent<sup>r</sup></i> ] | Agilent                                                                 |
| <i>pknK</i> KO (LIX11)                  | H37Rv $\Delta pknK$                                                                                                                                       | (1)                                                                     |
| <i>pknK</i> KO complement (LIX16)       | H37Rv $\Delta pknK::pMV306-pknK$                                                                                                                          | (1)                                                                     |
| VC (LIX70)                              | mc <sup>2</sup> 155::pJFR19                                                                                                                               | (2)                                                                     |
| WT <sub>OE</sub> (LIX79)                | mc <sup>2</sup> 155::pYA1662                                                                                                                              | (2)                                                                     |
| Mut <sub>OE</sub> (LIX80)               | mc <sup>2</sup> 155::pYA1671                                                                                                                              | (2)                                                                     |
|                                         |                                                                                                                                                           |                                                                         |
| <b>Plasmids</b>                         |                                                                                                                                                           |                                                                         |
| pUAB100                                 | Hyg <sup>r</sup> , <i>oriM oriE hsp60-GCN4-Gly<sub>10</sub>-mDHFR</i> [F1,2]                                                                              | (3)                                                                     |
| pUAB200                                 | Kan <sup>r</sup> , <i>attP int hsp60-GCN4-Gly<sub>10</sub>-mDHFR</i> [F3]                                                                                 | (3)                                                                     |
| pUAB300                                 | Hyg <sup>r</sup> , <i>oriM oriE hsp60-mDHFR</i> [F1,2]-Gly <sub>10</sub> -MCS                                                                             | (3)                                                                     |
| pUAB400                                 | Kan <sup>r</sup> , <i>attP int hsp60-mDHFR</i> [F3]-Gly <sub>10</sub> -MCS                                                                                | (3)                                                                     |
| pPROEx-PrrA                             | <i>prrA</i> cloned in pProEx-HTa                                                                                                                          | (4)                                                                     |
| pPROEx-MtrA                             | <i>mtrA</i> cloned in pProEx-HTb                                                                                                                          | (4)                                                                     |
| pYA1554                                 | <i>pknK</i> (1-900 bp) in <i>Bam</i> HI/ <i>Not</i> I of pGEX-4T2                                                                                         | This study                                                              |
| pUAB300-PknK                            | pUAB300:: <i>pknK</i> in <i>Hind</i> III site                                                                                                             | This study                                                              |
| pUAB400-PknK                            | pUAB400:: <i>pknK</i> in <i>Hind</i> III site                                                                                                             | This study                                                              |
| pUAB300-PrrA                            | pUAB300:: <i>prrA</i> in <i>Bam</i> HI and <i>Hind</i> III sites                                                                                          | This study                                                              |
| pUAB300-MtrA                            | pUAB300:: <i>mtrA</i> in <i>Bam</i> HI and <i>Hind</i> III sites                                                                                          | This study                                                              |

## References.

1. Malhotra, V., Arteaga-Cortes, L. T., Clay, G., and Clark-Curtiss, J. E. (2010) Mycobacterium tuberculosis protein kinase K confers survival advantage during early infection in mice and regulates growth in culture and during persistent infection: implications for immune modulation. *Microbiology (Reading)* **156**, 2829-2841
2. Malhotra, V., Okon, B. P., and Clark-Curtiss, J. E. (2012) Mycobacterium tuberculosis protein kinase K enables growth adaptation through translation control. *J Bacteriol* **194**, 4184-4196
3. Singh, A., Mai, D., Kumar, A., and Steyn, A. J. (2006) Dissecting virulence pathways of Mycobacterium tuberculosis through protein-protein association. *Proc Natl Acad Sci U S A* **103**, 11346-11351
4. Agrawal, R., Pandey, A., Rajankar, M. P., Dixit, N. M., and Saini, D. K. (2015) The two-component signalling networks of Mycobacterium tuberculosis display extensive cross-talk in vitro. *Biochem J* **469**, 121-134

Table S2: Protein Expression Ratios and Phosphostaining status of DIGE spots

Protein Ratio

Cut off : 1.5 fold

VC= Vector Control WT<sub>OE</sub>= WT PknK OE Mut<sub>OE</sub>=K55M PknK OE

| Spot No. | Original No. | Protein Expression Ratio by 2D-DIGE |                        | Positive for Phosphostaining |
|----------|--------------|-------------------------------------|------------------------|------------------------------|
|          |              | WT <sub>OE</sub> / VC               | Mut <sub>OE</sub> / VC |                              |
| 1        | 111          | 3.0                                 | 1.0                    | x                            |
| 2        | 121          | 1.5                                 | 27.2                   |                              |
| 3        | 99           | 1.2                                 | 1.6                    |                              |
| 4        | 80           | 2.4                                 | -1.0                   |                              |
| 5        | 199          | -1.6                                | -1.1                   |                              |
| 6        | 196          | 30.0                                | 1.1                    | x                            |
| 7        | 195          | 20.2                                | -1.1                   | x                            |
| 8        | 186          | 5.2                                 | -1.2                   | x                            |
| 9        | 188          | 12.8                                | -1.1                   |                              |
| 10       | 189          | -3.1                                | -1.0                   |                              |
| 11       | 191          | -4.5                                | 1.2                    |                              |
| 12       | 240          | -1.7                                | -1.0                   |                              |
| 13       | 285          | -1.6                                | -1.0                   |                              |
| 14       | 221          | 1.8                                 | -1.3                   | x                            |
| 15       | 292          | 1.9                                 | -1.1                   | x                            |
| 16       | 342          | 1.6                                 | -1.7                   | x                            |
| 17       | 348          | -1.6                                | -1.1                   |                              |
| 18       | 349          | -1.5                                | 1.1                    |                              |
| 19       | 309          | -1.4                                | 1.2                    |                              |
| 20       | 359          | 1.5                                 | -1.1                   | x                            |
| 21       | 398          | -1.8                                | 1.0                    | x                            |
| 22       | 508          | 1.9                                 | -1.2                   | x                            |
| 23       | 418          | -1.2                                | 1.5                    |                              |
| 24       | 430          | -1.4                                | 1.1                    |                              |
| 25       | 461          | -1.4                                | 1.1                    |                              |
| 26       | 462          | -1.5                                | 1.1                    |                              |
| 27       | 440          | 3.4                                 | -1.2                   |                              |
| 28       | 434          | -1.6                                | 1.1                    |                              |
| 29       | 542          | -1.6                                | -1.1                   | x                            |
| 30       | 567          | -1.2                                | 1.5                    | x                            |
| 31       | 518          | 1.2                                 | 1.7                    |                              |
| 32       | 574          | -1.4                                | 1.1                    |                              |
| 33       | 576          | -1.5                                | 1.2                    | x                            |
| 34       | 555          | -1.5                                | -1.0                   |                              |
| 35       | 678          | -2.2                                | 1.0                    |                              |
| 36       | 671          | 2.3                                 | 1.0                    | x                            |
| 37       | 724          | -1.4                                | 1.1                    | x                            |
| 38       | 670          | -1.9                                | 1.0                    | x                            |
| 39       | 679          | -1.7                                | 1.1                    |                              |
| 40       | 697          | 1.7                                 | 1.1                    |                              |
| 41       | 662          | 1.5                                 | -1.1                   |                              |
| 42       | 749          | -2.1                                | -1.2                   | x                            |
| 43       | 812          | -1.6                                | -1.1                   |                              |
| 44       | 803          | 1.7                                 | -1.2                   | x                            |
| 45       | 824          | -1.8                                | 1.0                    |                              |
| 46       | 853          | -2.2                                | 1.1                    |                              |
| 47       | 926          | 1.5                                 | -1.0                   | x                            |
| 48       | 980          | 1.3                                 | -1.3                   | x                            |
| 49       | 1075         | -1.5                                | -1.0                   |                              |
| 50       | 1085         | -1.5                                | 1.0                    |                              |
| 51       | 1103         | -1.2                                | 1.3                    |                              |
| 52       | 1214         | -2.3                                | -1.1                   |                              |
| 53       | 1253         | 1.8                                 | 1.0                    | x                            |
| 54       | 1261         | -2.0                                | -1.1                   |                              |
| 55       | 1264         | -2.3                                | -1.0                   |                              |
| 56       | 1286         | -2.0                                | -1.4                   |                              |
| 57       | 1359         | 1.6                                 | -1.0                   |                              |
| 58       | 1460         | 1.9                                 | 1.4                    |                              |
| 59       | 1489         | -1.6                                | 1.1                    |                              |
| 60       | 1517         | 1.5                                 | 1.1                    |                              |
| 61       | 1636         | -2.4                                | -1.2                   |                              |
| 62       | 1667         | -1.4                                | 1.1                    |                              |
| 63       | 1612         | -1.3                                | 1.2                    |                              |
| 64       | 1638         | -1.4                                | 1.1                    |                              |
| 65       | 1605         | -1.8                                | -1.1                   |                              |
| 66       | 1635         | 6.6                                 | -1.1                   |                              |
| 67       | 1695         | -1.6                                | 1.1                    |                              |
| 68       | 1721         | -1.7                                | 1.1                    |                              |
| 69       | 1785         | 4.1                                 | -1.4                   | x                            |
| 70       | 1789         | 6.9                                 | -1.0                   |                              |
| 71       | 1972         | -1.6                                | 1.0                    |                              |
| 72       | 1996         | -1.7                                | 1.2                    |                              |
| 73       | 2053         | -1.4                                | 1.1                    |                              |
| 74       | 2103         | -1.5                                | 1.2                    |                              |
| 75       | 2115         | -2.3                                | 1.0                    |                              |
| 76       | 2173         | 1.6                                 | -1.0                   |                              |
| 77       | 2243         | -1.6                                | 1.3                    |                              |

Table S3. Mass Spectrometry Analysis

| Spot number | MALDI well number | Match Quality | Top Ranked Protein Name (Species)                                                         | Accession No. | Protein MW | Protein PI | Pept. Count | Protein Score | Protein Score C. I. % | Total Ion Score | Total Ion C. I. % |
|-------------|-------------------|---------------|-------------------------------------------------------------------------------------------|---------------|------------|------------|-------------|---------------|-----------------------|-----------------|-------------------|
| 1           | B5                |               | serine/threonine-protein kinase transcriptional regulator [Mycobacterium bovis AF2122/97] | gi 31794259   | 119,373    | 5.5        | 52          | 1,050         | 100                   | 850             | 100               |
| 2           | B6                |               | serine/threonine-protein kinase transcriptional regulator [Mycobacterium bovis AF2122/97] | gi 31794259   | 119,373    | 5.5        | 48          | 753           | 100                   | 612             | 100               |
| 6           | B7                |               | transcription termination factor Rho [Mycobacterium smegmatis str. MC2 155]               | gi 118471197  | 71,705     | 6.7        | 24          | 158           | 100                   |                 |                   |
| 7           | B8                |               | transcription termination factor Rho [Mycobacterium smegmatis str. MC2 155]               | gi 118471197  | 71,705     | 6.7        | 26          | 327           | 100                   | 238             | 100               |
| 36          | B9                |               | histidine ammonia-lyase [Mycobacterium smegmatis str. MC2 155]                            | gi 118471752  | 53,355     | 5.9        | 21          | 778           | 100                   | 746             | 100               |
| 69          | B10               |               | hypothetical protein MSMEG_5010 [Mycobacterium smegmatis str. MC2 155]                    | gi 118469659  | 19,503     | 6.0        | 16          | 514           | 100                   | 425             | 100               |

Control

|         |     |  |                                                                                           |            |         |     |    |     |     |     |     |
|---------|-----|--|-------------------------------------------------------------------------------------------|------------|---------|-----|----|-----|-----|-----|-----|
| 1 fmol  | B11 |  | Beta-galactosidase OS=Escherichia coli O127:H6 (strain E2348/69 / EPEC) GN=lacZ PE=3 SV=1 | BGAL_ECO27 | 116,343 | 5.2 | 22 | 418 | 100 | 315 | 100 |
| 2 fmol  | B12 |  | Beta-galactosidase OS=Escherichia coli O127:H6 (strain E2348/69 / EPEC) GN=lacZ PE=3 SV=1 | BGAL_ECO27 | 116,343 | 5.2 | 22 | 451 | 100 | 349 | 100 |
| 5 fmol  | B13 |  | Beta-galactosidase OS=Escherichia coli (strain K12) GN=lacZ PE=1 SV=2                     | BGAL_ECOLI | 116,409 | 5.3 | 25 | 510 | 100 | 379 | 100 |
| 10 fmol | B14 |  | Beta-galactosidase OS=Escherichia coli (strain K12) GN=lacZ PE=1 SV=2                     | BGAL_ECOLI | 116,409 | 5.3 | 23 | 466 | 100 | 355 | 100 |

|                 |
|-----------------|
| high confidence |
| low confidence  |
| no confidence   |

| 2012_11                 |                                                                       |               |                        |                |            |               |                       |                 |                   |                                          |                    |             |             |  |
|-------------------------|-----------------------------------------------------------------------|---------------|------------------------|----------------|------------|---------------|-----------------------|-----------------|-------------------|------------------------------------------|--------------------|-------------|-------------|--|
| MARA121105              |                                                                       |               |                        |                |            |               |                       |                 |                   |                                          |                    |             |             |  |
| Analysis Information    |                                                                       |               |                        |                |            |               |                       |                 |                   |                                          |                    |             |             |  |
| Report Type             | Protein-Peptide Summary by Spot                                       |               |                        |                |            | Analysis Type | Combined (MS+MS/MS)   |                 |                   |                                          |                    |             |             |  |
| Sample Set Name         | MARA121105                                                            |               |                        |                |            | Database      | NCBI                  |                 |                   |                                          |                    |             |             |  |
| Analysis Name           | Mycobacterium smegmatis NCBI 1P                                       |               |                        |                |            | Creation Date |                       |                 |                   |                                          |                    |             |             |  |
| Reported By             |                                                                       |               |                        |                |            | Last Modified |                       |                 |                   |                                          |                    |             |             |  |
| MS Acq. : Proc. Methods | (Unspecified) : (Unspecified)                                         |               |                        |                |            |               |                       |                 |                   |                                          |                    |             |             |  |
| Interpretation Method   | (Unspecified)                                                         |               |                        |                |            |               |                       |                 |                   |                                          |                    |             |             |  |
| Gel Idx/Pos             | 32/65                                                                 |               | Instr./Gel Origin      | BA2060/121107A |            |               |                       |                 |                   |                                          |                    |             |             |  |
| Plate (#) Name          | [1] 31598                                                             |               | Instrument Sample Name |                |            |               |                       |                 |                   |                                          |                    |             |             |  |
| Rank                    | Protein Name                                                          | Accession No. | Protein MW             | Protein PI     | Pep. Count | Protein Score | Protein Score C. I. % | Total Ion Score | Total Ion C. I. % | Spectra                                  | Analysis Succeeded | Rank        | Result Type |  |
| 1                       | serine/threonine-protein kinase transcriptional regulator             | gi 31794259   | 119372.9               | 5.52           | 52         | 1,050         | 100                   | 850             | 100               |                                          |                    |             |             |  |
|                         | [Mycobacterium bovis AF2122/97]                                       |               |                        |                |            |               |                       |                 |                   |                                          |                    |             |             |  |
|                         | Peptide Information                                                   |               |                        |                |            |               |                       |                 |                   |                                          |                    |             |             |  |
|                         | Calc. Mass                                                            | Obsrv. Mass   | ± da                   | ± ppm          | Start Seq. | End Seq.      | Sequence              | Ion Score       | C. I. %           | Modification                             | Rank               | Result Type |             |  |
|                         | 846.5193                                                              | 846.5076      | -0.0118                | -14            | 232        | 233           | VIADFL                |                 |                   |                                          |                    | Mascot      |             |  |
|                         | 854.4519                                                              | 854.4397      | -0.0121                | -14            | 35         | 42            | GGFGVYR               |                 |                   |                                          |                    | Mascot      |             |  |
|                         | 880.4424                                                              | 880.4305      | -0.0119                | -14            | 118        | 124           | HGPLDWR               |                 |                   |                                          |                    | Mascot      |             |  |
|                         | 932.4948                                                              | 932.4824      | -0.0124                | -13            | 375        | 382           | STLAAGWR              |                 |                   |                                          |                    | Mascot      |             |  |
|                         | 945.5363                                                              | 945.522       | -0.0143                | -15            | 109        | 116           | NSLETIR               |                 |                   |                                          |                    | Mascot      |             |  |
|                         | 977.505                                                               | 977.4896      | -0.0154                | -16            | 782        | 803           | AVAEVADR              |                 |                   |                                          |                    | Mascot      |             |  |
|                         | 987.5217                                                              | 987.506       | -0.0157                | -16            | 564        | 573           | GGGDATOLL             |                 |                   |                                          |                    | Mascot      |             |  |
|                         | 1008.5584                                                             | 1008.5435     | -0.0149                | -15            | 133        | 142           | LAGALEAHR             |                 |                   |                                          |                    | Mascot      |             |  |
|                         | 1036.5436                                                             | 1036.5271     | -0.0165                | -16            | 117        | 124           | RHGPLDWR              |                 |                   |                                          |                    | Mascot      |             |  |
|                         | 1085.5044                                                             | 1085.49       | -0.0144                | -13            | 627        | 636           | AMLEEAHR              |                 |                   |                                          |                    | Mascot      |             |  |
|                         | 1139.642                                                              | 1139.624      | -0.018                 | -16            | 239        | 249           | ITSGPFDLR             |                 |                   |                                          |                    | Mascot      |             |  |
|                         | 1179.5066                                                             | 1179.4906     | -0.016                 | -14            | 642        | 650           | TEDDPNWR              |                 |                   |                                          |                    | Mascot      |             |  |
|                         | 1179.5066                                                             | 1179.4906     | -0.016                 | -14            | 642        | 650           | TEDDPNWR              | 50              | 8.026             |                                          |                    | Mascot      |             |  |
|                         | 1223.6532                                                             | 1223.6353     | -0.0179                | -15            | 466        | 466           | JAVIDDWHR             |                 |                   |                                          |                    | Mascot      |             |  |
|                         | 1252.7412                                                             | 1252.7192     | -0.022                 | -18            | 363        | 374           | LILHAPSGFGK           |                 |                   |                                          |                    | Mascot      |             |  |
|                         | 1259.7106                                                             | 1259.6931     | -0.0175                | -14            | 877        | 887           | LDIWAALQNR            |                 |                   |                                          |                    | Mascot      |             |  |
|                         | 1259.6931                                                             | 1259.6931     |                        |                |            |               |                       |                 |                   |                                          |                    | Mascot      |             |  |
|                         | 1263.6943                                                             | 1263.6771     | -0.0172                | -14            | 600        | 610           | EFLLVASVTR            |                 |                   |                                          |                    | Mascot      |             |  |
|                         | 1263.6943                                                             | 1263.6771     | -0.0172                | -14            | 600        | 610           | EFLLVASVTR            | 61              | 93.548            |                                          |                    | Mascot      |             |  |
|                         | 1267.7368                                                             | 1267.7136     | -0.0232                | -18            | 239        | 249           | ITSGPFDLR             |                 |                   |                                          |                    | Mascot      |             |  |
|                         | 1293.5925                                                             | 1293.658      | 0.0655                 | 51             | 721        | 730           | HTLLAVQK              |                 |                   | Oxidation (M1), Phospho (S1) [2,3]       |                    | Mascot      |             |  |
|                         | 1310.7363                                                             | 1310.6836     | -0.0528                | -17            | 263        | 263           | DGGLPADVAASER         |                 |                   |                                          |                    | Mascot      |             |  |
|                         | 1313.6696                                                             | 1313.6511     | -0.0185                | -14            | 773        | 784           | AELPEATQADR           |                 |                   |                                          |                    | Mascot      |             |  |
|                         | 1361.7172                                                             | 1361.6919     | -0.0253                | -19            | 782        | 803           | AVAEVADRVER           |                 |                   |                                          |                    | Mascot      |             |  |
|                         | 1438.8013                                                             | 1438.7759     | -0.0254                | -18            | 249        | 262           | KGGLPADVAASER         |                 |                   |                                          |                    | Mascot      |             |  |
|                         | 1448.8992                                                             | 1448.8681     | -0.0311                | -16            | 651        | 661           | FHOMFADLHR            |                 |                   |                                          |                    | Mascot      |             |  |
|                         | 1448.8992                                                             | 1448.8681     | -0.0311                | -16            | 651        | 661           | FHOMFADLHR            | 81              | 99.94             |                                          |                    | Mascot      |             |  |
|                         | 1464.8941                                                             | 1464.858      | -0.0361                | -18            | 651        | 661           | FHOMFADLHR            |                 |                   | Oxidation (M14)                          |                    | Mascot      |             |  |
|                         | 1472.759                                                              | 1472.7329     | -0.0261                | -18            | 505        | 518           | IGLELAIDSAALR         |                 |                   |                                          |                    | Mascot      |             |  |
|                         | 1484.8068                                                             | 1484.781      | -0.0258                | -17            | 967        | 981           | LSTGGDTAVQLGLPR       |                 |                   |                                          |                    | Mascot      |             |  |
|                         | 1512.757                                                              | 1512.7281     | -0.0289                | -19            | 336        | 348           | YRPSVPTGSLVTR         |                 |                   | Phospho (Y1) [1]                         |                    | Mascot      |             |  |
|                         | 1518.7693                                                             | 1518.7423     | -0.027                 | -18            | 611        | 626           | TCGGLASLAGITNGR       |                 |                   | Carbamidomethyl (C12)                    |                    | Mascot      |             |  |
|                         | 1529.8546                                                             | 1529.8271     | -0.0275                | -18            | 875        | 887           | NRLDIVAALQNR          |                 |                   |                                          |                    | Mascot      |             |  |
|                         | 1542.8057                                                             | 1542.7792     | -0.0265                | -17            | 822        | 837           | VPGTAGNTAALACR        |                 |                   | Carbamidomethyl (C115)                   |                    | Mascot      |             |  |
|                         | 1545.7967                                                             | 1545.764      | -0.0327                | -15            | 56         | 68            | VLSTDLDRDLER          |                 |                   |                                          |                    | Mascot      |             |  |
|                         | 1622.772                                                              | 1622.9424     | 0.1704                 | 106            | 822        | 837           | VPGTAGNTAALACR        |                 |                   | Carbamidomethyl (C115), Phospho (S1) [4] |                    | Mascot      |             |  |
|                         | 1631.9843                                                             | 1631.9554     | -0.0289                | -18            | 993        | 1009          | LGALPAVAADLLAPR       |                 |                   |                                          |                    | Mascot      |             |  |
|                         | 1631.9843                                                             | 1631.9554     | -0.0289                | -18            | 993        | 1009          | LGALPAVAADLLAPR       | 157             | 100               |                                          |                    | Mascot      |             |  |
|                         | 1681.8405                                                             | 1681.8092     | -0.0313                | -19            | 888        | 904           | TAFEVGTAVGAHSHAAR     |                 |                   |                                          |                    | Mascot      |             |  |
|                         | 1748.845                                                              | 1748.8118     | -0.0332                | -19            | 519        | 535           | FTDEAAALLNDAGLLR      |                 |                   |                                          |                    | Mascot      |             |  |
|                         | 1762.8137                                                             | 1762.7773     | -0.0364                | -21            | 1032       | 1047          | LISAGDSADRQDQDR       |                 |                   | Carbamidomethyl (C114)                   |                    | Mascot      |             |  |
|                         | 1804.8927                                                             | 1804.8574     | -0.0353                | -20            | 267        | 283           | HPDRPATAADVGEELR      |                 |                   |                                          |                    | Mascot      |             |  |
|                         | 1828.8113                                                             | 1828.7734     | -0.0379                | -21            | 519        | 535           | FTDEAAALLNDAGLLR      |                 |                   | Phospho (S1) [3]                         |                    | Mascot      |             |  |
|                         | 1846.9293                                                             | 1846.8922     | -0.0371                | -20            | 539        | 556           | ADVOALTSTDGWAAL       |                 |                   |                                          |                    | Mascot      |             |  |
|                         | 1846.9293                                                             | 1846.8922     | -0.0371                | -20            | 539        | 556           | ADVOALTSTDGWAAL       | 157             | 100               |                                          |                    | Mascot      |             |  |
|                         | 1907.8651                                                             | 1907.8225     | -0.0426                | -22            | 1014       | 1031          | TNGIATMTAELDESAVR     |                 |                   |                                          |                    | Mascot      |             |  |
|                         | 1914.9291                                                             | 1914.8871     | -0.042                 | -22            | 704        | 720           | AVLVVGDSTLPSQIK       |                 |                   |                                          |                    | Mascot      |             |  |
|                         | 1931.8698                                                             | 1931.8361     | -0.0337                | -14            | 1086       | 1102          | NELAPVATKCAELGSR      |                 |                   | Phospho (S1) [16], Phospho (S1) [8]      |                    | Mascot      |             |  |
|                         | 1939.9794                                                             | 1939.9386     | -0.0408                | -21            | 289        | 306           | NGVSDVDEMLPVLGVG      |                 |                   |                                          |                    | Mascot      |             |  |
|                         | 1955.9742                                                             | 1955.9326     | -0.0416                | -21            | 289        | 306           | NGVSDVDEMLPVLGVG      |                 |                   | Oxidation (M18)                          |                    | Mascot      |             |  |
|                         | 1956.7905                                                             | 1956.9348     | 0.1343                 | 68             | 318        | 335           | HTGGGTPVPTPTIPATK     |                 |                   | Phospho (S1) [2,6,8]                     |                    | Mascot      |             |  |
|                         | 1995.9663                                                             | 1995.9735     | 0.0072                 | 4              | 125        | 142           | ETLSGKLAGALEAHR       |                 |                   | Phospho (S1) [4], Phospho (S1) [2]       |                    | Mascot      |             |  |
|                         | 2012.0117                                                             | 2011.967      | -0.0447                | -22            | 804        | 821           | VDDLLEAMSRPDTLPP      |                 |                   | Oxidation (M19)                          |                    | Mascot      |             |  |
|                         | 2090.1128                                                             | 2090.0718     | -0.041                 | -20            | 905        | 925           | LAGSLAELLYETGDLG      |                 |                   |                                          |                    | Mascot      |             |  |
|                         | 2230.0696                                                             | 2230.0222     | -0.0474                | -21            | 926        | 946           | LMDESYLLGSEGGAVDY     |                 |                   |                                          |                    | Mascot      |             |  |
|                         | 2230.0696                                                             | 2230.0222     | -0.0474                | -21            | 926        | 946           | LAAR                  | 161             | 100               |                                          |                    | Mascot      |             |  |
|                         | 2243.2993                                                             | 2243.2505     | -0.0478                | -21            | 1080       | 1080          | RPLAALQADLHETLAATGR   |                 |                   |                                          |                    | Mascot      |             |  |
|                         | 2246.0645                                                             | 2246.0164     | -0.0481                | -21            | 926        | 946           | LMDESYLLGSEGGAVDY     |                 |                   | Oxidation (M12)                          |                    | Mascot      |             |  |
|                         | 2303.1487                                                             | 2303.1006     | -0.0481                | -21            | 267        | 287           | HPDRPATAADVGEELR      |                 |                   |                                          |                    | Mascot      |             |  |
|                         | 2358.1787                                                             | 2358.1289     | -0.0508                | -22            | 418        | 439           | VRPTLAESLGHVLEHG      |                 |                   |                                          |                    | Mascot      |             |  |
|                         | 2510.2773                                                             | 2510.2209     | -0.0564                | -22            | 12         | 34            | DLVNPAAELLEAGFDNV     |                 |                   |                                          |                    | Mascot      |             |  |
|                         | 2632.3616                                                             | 2632.3037     | -0.0579                | -22            | 149        | 172           | DVYKPNILLTYGEPQLT     |                 |                   |                                          |                    | Mascot      |             |  |
|                         | 2632.3616                                                             | 2632.3037     | -0.0579                | -22            | 149        | 172           | DVYKPNILLTYGEPQLT     | 184             | 100               |                                          |                    | Mascot      |             |  |
|                         | 2739.291                                                              | 2739.2271     | -0.0639                | -23            | 678        | 703           | ASAWFAENYGLHEAVH      |                 |                   |                                          |                    | Mascot      |             |  |
|                         | 2840.4312                                                             | 2840.3694     | -0.0618                | -22            | 574        | 599           | GLSGASDVHFLSENVL      |                 |                   |                                          |                    | Mascot      |             |  |
|                         | 2840.4312                                                             | 2840.3694     | -0.0618                | -22            | 574        | 599           | DTLEPELR              |                 |                   |                                          |                    | Mascot      |             |  |
| 2                       | conserved hypothetical protein [Mycobacterium tuberculosis 94_M4241A] | gi 29852652   | 119372.9               | 5.52           | 52         | 1,050         | 100                   | 850             | 100               |                                          |                    |             |             |  |
|                         | Peptide Information                                                   |               |                        |                |            |               |                       |                 |                   |                                          |                    |             |             |  |
|                         | Calc. Mass                                                            | Obsrv. Mass   | ± da                   | ± ppm          | Start Seq. | End Seq.      | Sequence              | Ion Score       | C. I. %           | Modification                             | Rank               | Result Type |             |  |
|                         | 846.5193                                                              | 846.5076      | -0.0118                | -14            | 232        | 233           | VIADFL                |                 |                   |                                          |                    | Mascot      |             |  |
|                         | 854.4519                                                              | 854.4397      | -0.0121                | -14            | 35         | 42            | GGFGVYR               |                 |                   |                                          |                    | Mascot      |             |  |
|                         | 880.4424                                                              | 880.4305      | -0.0119                | -14            | 118        | 124           | HGPLDWR               |                 |                   |                                          |                    | Mascot      |             |  |
|                         | 932.4948                                                              | 932.4824      | -0.0124                | -13            | 375        | 382           | STLAAGWR              |                 |                   |                                          |                    | Mascot      |             |  |
|                         | 945.5363                                                              | 945.522       | -0.0143                | -15            | 109        | 116           | NSLETIR               |                 |                   |                                          |                    | Mascot      |             |  |
|                         | 977.505                                                               | 977.4896      | -0.0154                | -16            | 782        | 803           | AVAEVADR              |                 |                   |                                          |                    | Mascot      |             |  |
|                         | 987.5217                                                              | 987.506       | -0.0157                | -16            | 564        | 573           | GGGDATOLL             |                 |                   |                                          |                    | Mascot      |             |  |
|                         | 1008.5584                                                             | 1008.5435     | -0.0149                | -15            | 133        | 142           | LAGALEAHR             |                 |                   |                                          |                    | Mascot      |             |  |
|                         | 1036.5436                                                             | 1036.5271     | -0.0165                | -16            | 117        | 124           | RHGPLDWR              |                 |                   |                                          |                    | Mascot      |             |  |
|                         | 1085.5061                                                             | 1085.49       | -0.0161                | -15            | 731        | 736           | LPTSMVSR              |                 |                   | Oxidation (M15), Phospho (S1) [3]        |                    | Mascot      |             |  |



| Rank                               | Protein Name                                              | Accession No. | Protein MW | PI         | Pop. Count | Protein Score      | Protein Score | Total Ion Score | C. I. %      | Modification | Rank        | Result Type |
|------------------------------------|-----------------------------------------------------------|---------------|------------|------------|------------|--------------------|---------------|-----------------|--------------|--------------|-------------|-------------|
| 1                                  | serine/threonine-protein kinase transcriptional regulator | gi 31794259   | 119372.9   | 5.52       | 48         | 753                | 100           | 612             | 100          |              |             |             |
| [Mycobacterium bovis AF2122/97]    |                                                           |               |            |            |            |                    |               |                 |              |              |             |             |
| Peptide Information                |                                                           |               |            |            |            |                    |               |                 |              |              |             |             |
| Calc. Mass                         | Obsrv. Mass                                               | ± da          | ± ppm      | Start Seq. | End Seq.   | Sequence           | Ion Score     | C. I. %         | Modification | Rank         | Result Type |             |
| 846.5196                           | 846.5083                                                  | -0.0112       | -13        | 230        | 238        | VIAQFLR            |               |                 |              |              | Mascot      |             |
| 854.4518                           | 854.4405                                                  | -0.0113       | -13        | 35         | 42         | GGFVVYR            |               |                 |              |              | Mascot      |             |
| 880.4424                           | 880.4323                                                  | -0.0101       | -11        | 118        | 124        | HGFLDWR            |               |                 |              |              | Mascot      |             |
| 932.4948                           | 932.4852                                                  | -0.0096       | -10        | 375        | 382        | STLAQWR            |               |                 |              |              | Mascot      |             |
| 945.5363                           | 945.5341                                                  | -0.0222       | -13        | 169        | 116        | NSLTLR             |               |                 |              |              | Mascot      |             |
| 977.5595                           | 977.4932                                                  | -0.0153       | -13        | 792        | 800        | AVAEVADR           |               |                 |              |              | Mascot      |             |
| 987.5717                           | 987.5089                                                  | -0.0128       | -13        | 584        | 573        | GGGDATQLR          |               |                 |              |              | Mascot      |             |
| 1008.5584                          | 1008.5454                                                 | -0.0133       | -13        | 133        | 142        | LAGALEAHR          |               |                 |              |              | Mascot      |             |
| 1036.5438                          | 1036.5291                                                 | -0.0145       | -14        | 117        | 124        | RHGFLDWR           |               |                 |              |              | Mascot      |             |
| 1138.6462                          | 1138.6394                                                 | -0.0138       | -13        | 239        | 249        | ITTSQIPDLR         |               |                 |              |              | Mascot      |             |
| 1175.5066                          | 1175.4916                                                 | -0.0151       | -13        | 642        | 650        | TEDDPNWR           |               |                 |              |              | Mascot      |             |
| 1175.5066                          | 1175.4916                                                 | -0.0151       | -13        | 642        | 650        | TEDDPNWR           | 38            | 0               |              |              | Mascot      |             |
| 1223.6534                          | 1223.6361                                                 | -0.0171       | -14        | 466        | 465        | JAVVDDWHR          |               |                 |              |              | Mascot      |             |
| 1252.7472                          | 1252.7229                                                 | -0.0183       | -15        | 363        | 374        | LLHAPSGFGK         |               |                 |              |              | Mascot      |             |
| 1259.7105                          | 1259.6946                                                 | -0.0161       | -13        | 877        | 887        | LDVAALQNR          |               |                 |              |              | Mascot      |             |
| 1259.7105                          | 1259.6946                                                 | -0.0161       | -13        | 877        | 887        | LDVAALQNR          |               |                 |              |              | Mascot      |             |
| 1263.6943                          | 1263.6783                                                 | -0.0161       | -13        | 600        | 610        | EFLLVASVTR         |               |                 |              |              | Mascot      |             |
| 1263.6943                          | 1263.6783                                                 | -0.0161       | -13        | 600        | 610        | EFLLVASVTR         | 38            | 0               |              |              | Mascot      |             |
| 1267.7368                          | 1267.7196                                                 | -0.0212       | -17        | 239        | 249        | ITTSQIPDLR         |               |                 |              |              | Mascot      |             |
| 1310.7063                          | 1310.6873                                                 | -0.0190       | -14        | 250        | 262        | DGLPAQVAIAER       |               |                 |              |              | Mascot      |             |
| 1313.6698                          | 1313.6522                                                 | -0.0174       | -13        | 773        | 784        | AEPEATQADR         |               |                 |              |              | Mascot      |             |
| 1361.7172                          | 1361.6934                                                 | -0.0238       | -17        | 792        | 803        | AVAEVADR           |               |                 |              |              | Mascot      |             |
| 1432.7906                          | 1432.7662                                                 | -0.0244       | -17        | 336        | 348        | YRPSVPTGLVTR       |               |                 |              |              | Mascot      |             |
| 1448.6892                          | 1448.6676                                                 | -0.0216       | -15        | 651        | 661        | THOMFADFLHR        | 55            | 77.837          |              |              | Mascot      |             |
| 1448.6892                          | 1448.6676                                                 | -0.0216       | -15        | 651        | 661        | THOMFADFLHR        |               |                 |              |              | Mascot      |             |
| 1448.6892                          | 1448.6676                                                 | -0.0216       | -15        | 651        | 661        | THOMFADFLHR        |               |                 |              |              | Mascot      |             |
| 1458.6841                          | 1458.6588                                                 | -0.0253       | -17        | 651        | 661        | THOMFADFLHR        |               |                 |              |              | Mascot      |             |
| 1472.7599                          | 1472.7351                                                 | -0.0248       | -16        | 505        | 518        | KGDELAIDSAALR      |               |                 |              |              | Mascot      |             |
| 1484.8068                          | 1484.7839                                                 | -0.0229       | -15        | 967        | 981        | LSTGGDTAVOLGLPR    |               |                 |              |              | Mascot      |             |
| 1518.7693                          | 1518.7469                                                 | -0.0224       | -15        | 611        | 626        | TCGGLASALAGITNGR   |               |                 |              |              | Mascot      |             |
| 1529.8546                          | 1529.8276                                                 | -0.0270       | -18        | 875        | 887        | NRLVVAALQNR        |               |                 |              |              | Mascot      |             |
| 1542.8057                          | 1542.7795                                                 | -0.0262       | -17        | 822        | 832        | VRPTAGNTAALAAICR   |               |                 |              |              | Mascot      |             |
| 1545.7867                          | 1545.7667                                                 | -0.0200       | -13        | 66         | 66         | VLSTLDLDRDLR       |               |                 |              |              | Mascot      |             |
| 1622.7772                          | 1622.813                                                  | 0.141         | 87         | 822        | 837        | VPGTAGNTAALAAICR   |               |                 |              |              | Mascot      |             |
| 1631.9843                          | 1631.957                                                  | -0.0273       | -17        | 993        | 1006       | LGIALPAAVAADLLAPR  | 144           | 100             |              |              | Mascot      |             |
| 1631.9843                          | 1631.957                                                  | -0.0273       | -17        | 993        | 1006       | LGIALPAAVAADLLAPR  |               |                 |              |              | Mascot      |             |
| 1681.8445                          | 1681.8108                                                 | -0.0337       | -18        | 889        | 904        | FAFEVGTAVGASHAAR   |               |                 |              |              | Mascot      |             |
| 1748.845                           | 1748.8136                                                 | -0.0314       | -16        | 519        | 536        | FDTDEAALLNDAGGLR   | 136           | 100             |              |              | Mascot      |             |
| 1748.845                           | 1748.8136                                                 | -0.0314       | -16        | 519        | 536        | FDTDEAALLNDAGGLR   |               |                 |              |              | Mascot      |             |
| 1762.8137                          | 1762.7791                                                 | -0.0346       | -20        | 1032       | 1047       | LLSAGDSADRDQACQR   |               |                 |              |              | Mascot      |             |
| 1804.8937                          | 1804.8573                                                 | -0.0364       | -20        | 267        | 283        | HPADRPTAADVGEELR   |               |                 |              |              | Mascot      |             |
| 1846.9293                          | 1846.8928                                                 | -0.0365       | -20        | 539        | 556        | ADVQALTTSTDGWAALR  | 157           | 100             |              |              | Mascot      |             |
| 1846.9293                          | 1846.8928                                                 | -0.0365       | -20        | 539        | 556        | ADVQALTTSTDGWAALR  |               |                 |              |              | Mascot      |             |
| 1846.9293                          | 1846.8928                                                 | -0.0365       | -20        | 539        | 556        | ADVQALTTSTDGWAALR  |               |                 |              |              | Mascot      |             |
| 1907.8651                          | 1907.8235                                                 | -0.0416       | -22        | 1014       | 1031       | DNGIATMTAELDEDSAVR |               |                 |              |              | Mascot      |             |
| 1914.9291                          | 1914.8869                                                 | -0.0423       | -22        | 704        | 720        | AVDLVEQETNLPEQSK   |               |                 |              |              | Mascot      |             |
| 1931.8698                          | 1931.8981                                                 | 0.0283        | 18         | 1088       | 1102       | NELAPVATKCAELGLSR  |               |                 |              |              | Mascot      |             |
| 1939.9794                          | 1939.9386                                                 | -0.0408       | -21        | 289        | 306        | NGVSVDEMPLPVELGVE  |               |                 |              |              | Mascot      |             |
| 1939.9794                          | 1939.9386                                                 | -0.0408       | -21        | 289        | 306        | NGVSVDEMPLPVELGVE  |               |                 |              |              | Mascot      |             |
| 1995.9663                          | 1995.9725                                                 | 0.0062        | 3          | 125        | 142        | ETLSGKVLGAGALEAHR  |               |                 |              |              | Mascot      |             |
| 2012.0117                          | 2011.9703                                                 | -0.0414       | -21        | 804        | 821        | VDDLLEAMSRPDTLPP   |               |                 |              |              | Mascot      |             |
| 2090.1128                          | 2090.0718                                                 | -0.041        | -20        | 905        | 925        | LAGSLAELLYETGDLAG  |               |                 |              |              | Mascot      |             |
| 2230.0696                          | 2230.0222                                                 | -0.0474       | -21        | 926        | 946        | LMDESYLEGEGGAVDY   |               |                 |              |              | Mascot      |             |
| 2230.0696                          | 2230.0222                                                 | -0.0474       | -21        | 926        | 946        | LMDESYLEGEGGAVDY   | 161           | 100             |              |              | Mascot      |             |
| 2243.2983                          | 2243.2505                                                 | -0.0478       | -21        | 1080       | 1080       | RPLAALQAOILHETLAAT |               |                 |              |              | Mascot      |             |
| 2246.0645                          | 2246.0164                                                 | -0.0481       | -21        | 926        | 946        | LMDESYLEGEGGAVDY   |               |                 |              |              | Mascot      |             |
| 2303.1487                          | 2303.1006                                                 | -0.0481       | -21        | 267        | 287        | HPADRPTAADVGEELR   |               |                 |              |              | Mascot      |             |
| 2358.1797                          | 2358.1289                                                 | -0.0508       | -22        | 418        | 439        | VRPTLAESLGHVLEEHG  |               |                 |              |              | Mascot      |             |
| 2510.2773                          | 2510.2209                                                 | -0.0564       | -22        | 12         | 34         | DLVPNIPAELEAGFDNV  |               |                 |              |              | Mascot      |             |
| 2632.3616                          | 2632.3037                                                 | -0.0579       | -22        | 149        | 172        | DVKPGNILLTDYGEPLT  | 184           | 100             |              |              | Mascot      |             |
| 2632.3616                          | 2632.3037                                                 | -0.0579       | -22        | 149        | 172        | DVKPGNILLTDYGEPLT  |               |                 |              |              | Mascot      |             |
| 2739.291                           | 2739.2271                                                 | -0.0639       | -23        | 678        | 703        | ASAWFAENGYLHEAVDH  |               |                 |              |              | Mascot      |             |
| 2840.4312                          | 2840.3694                                                 | -0.0618       | -22        | 574        | 599        | GLSGASDVHEFLSENVL  |               |                 |              |              | Mascot      |             |
| 2840.4312                          | 2840.3694                                                 | -0.0618       | -22        | 574        | 599        | GLSGASDVHEFLSENVL  |               |                 |              |              | Mascot      |             |
| Gel Idx/Pos: 33/66                 |                                                           |               |            |            |            |                    |               |                 |              |              |             |             |
| Plate (#) Name: (1) 31598          |                                                           |               |            |            |            |                    |               |                 |              |              |             |             |
| Instr./Gel Origin: BA2060/121107A  |                                                           |               |            |            |            |                    |               |                 |              |              |             |             |
| Process Status: Analysis Succeeded |                                                           |               |            |            |            |                    |               |                 |              |              |             |             |
| Spectra: 8                         |                                                           |               |            |            |            |                    |               |                 |              |              |             |             |

| Calc. Mass                                                                                               | Obsrv. Mass                                         | ± da                 | ± ppm             | Start Seq.        | End Seq.          | Sequence             | Ion Score            | C. I. %                | Modification                             | Rank           | Result Type        |
|----------------------------------------------------------------------------------------------------------|-----------------------------------------------------|----------------------|-------------------|-------------------|-------------------|----------------------|----------------------|------------------------|------------------------------------------|----------------|--------------------|
| 846.5196                                                                                                 | 846.5083                                            | -0.0112              | -13               | 232               | 238               | VIAQFLR              |                      |                        |                                          |                | Mascot             |
| 854.4518                                                                                                 | 854.4405                                            | -0.0113              | -13               | 35                | 42                | GGFVWYR              |                      |                        |                                          |                | Mascot             |
| 880.4424                                                                                                 | 880.4323                                            | -0.0101              | -11               | 118               | 124               | HGFLDWR              |                      |                        |                                          |                | Mascot             |
| 932.4948                                                                                                 | 932.4852                                            | -0.0096              | -10               | 375               | 382               | STLAAGWR             |                      |                        |                                          |                | Mascot             |
| 945.5363                                                                                                 | 945.5241                                            | -0.0122              | -13               | 169               | 175               | NSLLELR              |                      |                        |                                          |                | Mascot             |
| 977.5261                                                                                                 | 977.492                                             | -0.035               | -13               | 792               | 800               | AVAEVADR             |                      |                        |                                          |                | Mascot             |
| 987.5217                                                                                                 | 987.5089                                            | -0.0128              | -13               | 564               | 573               | GGDATQLLR            |                      |                        |                                          |                | Mascot             |
| 1008.5584                                                                                                | 1008.5454                                           | -0.013               | -13               | 133               | 142               | LAGALEAHR            |                      |                        |                                          |                | Mascot             |
| 1036.5436                                                                                                | 1036.5291                                           | -0.0145              | -14               | 117               | 124               | RHGFLDWR             |                      |                        |                                          |                | Mascot             |
| 1139.662                                                                                                 | 1139.6394                                           | -0.0226              | -13               | 239               | 248               | ITSQIPDLR            |                      |                        |                                          |                | Mascot             |
| 1179.5066                                                                                                | 1179.4916                                           | -0.015               | -13               | 642               | 650               | TEDDPWFR             |                      |                        |                                          |                | Mascot             |
| 1179.5066                                                                                                | 1179.4916                                           | -0.015               | -13               | 642               | 650               | TEDDPWFR             | 38                   | 0                      |                                          |                | Mascot             |
| 1223.6532                                                                                                | 1223.6361                                           | -0.0171              | -14               | 466               | 466               | IAYVDDWHR            |                      |                        |                                          |                | Mascot             |
| 1252.7472                                                                                                | 1252.7229                                           | -0.0243              | -15               | 363               | 374               | LLHAPSGFGK           |                      |                        |                                          |                | Mascot             |
| 1259.7106                                                                                                | 1259.6946                                           | -0.016               | -13               | 877               | 887               | LDNLAQNGFR           |                      |                        |                                          |                | Mascot             |
| 1263.6943                                                                                                | 1263.6783                                           | -0.016               | -13               | 600               | 610               | EFLLVASVTER          |                      |                        |                                          |                | Mascot             |
| 1263.6943                                                                                                | 1263.6783                                           | -0.016               | -13               | 600               | 610               | EFLLVASVTER          | 38                   | 0                      |                                          |                | Mascot             |
| 1267.7368                                                                                                | 1267.7156                                           | -0.0212              | -17               | 239               | 249               | ITSQIPDLR            |                      |                        |                                          |                | Mascot             |
| 1313.6696                                                                                                | 1313.6522                                           | -0.0174              | -13               | 773               | 784               | KELPEATQADLR         |                      |                        |                                          |                | Mascot             |
| 1361.7172                                                                                                | 1361.6934                                           | -0.0238              | -15               | 782               | 803               | AVAEVADRVRR          |                      |                        |                                          |                | Mascot             |
| 1448.6892                                                                                                | 1448.6676                                           | -0.0216              | -15               | 661               | 661               | FHQMFADLHR           | 55                   | 77.837                 |                                          |                | Mascot             |
| 1448.6892                                                                                                | 1448.6676                                           | -0.0216              | -15               | 661               | 661               | FHQMFADLHR           |                      |                        |                                          |                | Mascot             |
| 1454.6841                                                                                                | 1454.6588                                           | -0.0253              | -17               | 661               | 661               | FHQMFADLHR           |                      |                        | Oxidation (M[4])                         |                | Mascot             |
| 1472.759                                                                                                 | 1472.735                                            | -0.024               | -16               | 505               | 518               | IGDELAEDSAALR        |                      |                        |                                          |                | Mascot             |
| 1484.8268                                                                                                | 1484.7939                                           | -0.0329              | -15               | 867               | 884               | LSISGGDTAVDGLRR      |                      |                        |                                          |                | Mascot             |
| 1518.7693                                                                                                | 1518.7469                                           | -0.0224              | -15               | 811               | 826               | ITCGASLAGITNRR       |                      |                        | Carbamidomethyl (C[2])                   |                | Mascot             |
| 1529.8546                                                                                                | 1529.8276                                           | -0.027               | -16               | 875               | 887               | NRLDVAALQNGFR        |                      |                        |                                          |                | Mascot             |
| 1542.8057                                                                                                | 1542.7795                                           | -0.0262              | -17               | 822               | 837               | VPGTAGNTAALAAQR      |                      |                        | Carbamidomethyl (C[15])                  |                | Mascot             |
| 1545.7967                                                                                                | 1545.7667                                           | -0.03                | -13               | 56                | 66                | VLSTDLDRDNLRR        |                      |                        |                                          |                | Mascot             |
| 1622.772                                                                                                 | 1622.813                                            | 0.041                | 87                | 822               | 837               | SVPRTAGNTAALAAQR     |                      |                        | Carbamidomethyl (C[15]), Phospho (ST[4]) |                | Mascot             |
| 1631.9843                                                                                                | 1631.957                                            | -0.0273              | -17               | 993               | 1009              | LGALPAVAADLLAPR      | 144                  | 100                    |                                          |                | Mascot             |
| 1631.9843                                                                                                | 1631.957                                            | -0.0273              | -17               | 993               | 1009              | LGALPAVAADLLAPR      |                      |                        |                                          |                | Mascot             |
| 1681.8405                                                                                                | 1681.8106                                           | -0.0297              | -16               | 888               | 904               | TAFEVGTAVGASHAAR     |                      |                        |                                          |                | Mascot             |
| 1748.845                                                                                                 | 1748.8136                                           | -0.0314              | -16               | 518               | 536               | FDTDEAALLNDAGGLR     |                      |                        |                                          |                | Mascot             |
| 1748.845                                                                                                 | 1748.8136                                           | -0.0314              | -16               | 518               | 536               | FDTDEAALLNDAGGLR     | 136                  | 100                    |                                          |                | Mascot             |
| 1762.8137                                                                                                | 1762.791                                            | -0.0226              | -16               | 1032              | 1047              | LLSAGDSARDQDQGR      |                      |                        | Carbamidomethyl (C[14])                  |                | Mascot             |
| 1804.8937                                                                                                | 1804.8573                                           | -0.0364              | -20               | 267               | 283               | HPADRPTAADVGEELR     |                      |                        |                                          |                | Mascot             |
| 1846.9293                                                                                                | 1846.8928                                           | -0.0365              | -20               | 539               | 556               | ADVQALTTSDGWAAAL     | 157                  | 100                    |                                          |                | Mascot             |
| 1846.9293                                                                                                | 1846.8928                                           | -0.0365              | -20               | 539               | 556               | ADVQALTTSDGWAAAL     |                      |                        |                                          |                | Mascot             |
| 1897.8651                                                                                                | 1897.8236                                           | -0.0415              | -22               | 1940              | 1938              | DNKATMTALDEDSAVR     |                      |                        |                                          |                | Mascot             |
| 1914.8291                                                                                                | 1914.8668                                           | 0.0377               | 20                | 704               | 720               | AVDLYQDETNLPEQGR     |                      |                        |                                          |                | Mascot             |
| 1931.8698                                                                                                | 1931.8981                                           | 0.0283               | 15                | 1089              | 1102              | NELAPVATKCAELGSR     |                      |                        | Phospho (ST[16]), Phospho (ST[8])        |                | Mascot             |
| 1939.9794                                                                                                | 1939.9385                                           | -0.0409              | -21               | 289               | 306               | NGVSDPEMLPVELGVE     |                      |                        |                                          |                | Mascot             |
| 1995.9563                                                                                                | 1995.9725                                           | 0.0162               | 3                 | 125               | 142               | ETLSIGVLLAGALEAHR    |                      |                        | Phospho (ST[4]), Phospho (ST[2])         |                | Mascot             |
| 2012.0117                                                                                                | 2011.9703                                           | -0.0414              | -21               | 804               | 821               | VYDLLAEAMSPDPLRP     |                      |                        | Oxidation (M[9])                         |                | Mascot             |
| 2090.1128                                                                                                | 2090.0718                                           | -0.041               | -20               | 906               | 925               | LAGSLAELLYEQDLG      |                      |                        |                                          |                | Mascot             |
| 2230.0696                                                                                                | 2230.0239                                           | -0.0457              | -20               | 906               | 946               | LMDESYLEGSEGGAVDY    |                      |                        |                                          |                | Mascot             |
| 2243.2963                                                                                                | 2243.2512                                           | -0.0451              | -21               | 1060              | 1080              | RPLAALQAQIHETLAAT    | 43                   | 0                      |                                          |                | Mascot             |
| 2243.2963                                                                                                | 2243.2512                                           | -0.0451              | -21               | 1060              | 1080              | RPLAALQAQIHETLAAT    |                      |                        |                                          |                | Mascot             |
| 2246.0645                                                                                                | 2246.0183                                           | -0.0462              | -21               | 926               | 946               | LMDESYLEGSEGGAVDY    |                      |                        | Oxidation (M[2])                         |                | Mascot             |
| 2303.1487                                                                                                | 2303.1021                                           | -0.0466              | -20               | 267               | 287               | HPADRPTAADVGEELR     |                      |                        |                                          |                | Mascot             |
| 2358.1797                                                                                                | 2358.1292                                           | -0.0505              | -21               | 418               | 439               | VRPTLAESLGHVLEHG     |                      |                        |                                          |                | Mascot             |
| 2510.2773                                                                                                | 2510.2205                                           | -0.0568              | -23               | 12                | 34                | DLVPNIPAELEAGFQNV    |                      |                        |                                          |                | Mascot             |
| 2632.3616                                                                                                | 2632.3037                                           | -0.0579              | -22               | 149               | 172               | DVKPGNILLDYGEPQLT    |                      |                        |                                          |                | Mascot             |
| 2739.291                                                                                                 | 2739.2261                                           | -0.0648              | -24               | 678               | 703               | ASAWFAENGLHEAVDH     |                      |                        |                                          |                | Mascot             |
| 2840.4312                                                                                                | 2840.3696                                           | -0.0616              | -22               | 574               | 599               | GLSGASDVHEFLSENVL    |                      |                        |                                          |                | Mascot             |
| <b>Gel Idx/Pos</b> 34/7 <b>Instr./Gel Origin</b> BA2060/121107A <b>Process Status</b> Analysis Succeeded |                                                     |                      |                   |                   |                   |                      |                      |                        |                                          |                |                    |
| <b>Plate #/Name</b>                                                                                      | [1] 31598                                           |                      |                   |                   |                   |                      |                      |                        |                                          |                |                    |
| <b>Rank</b>                                                                                              | <b>Protein Name</b>                                 | <b>Accession No.</b> | <b>Protein MW</b> | <b>Protein PI</b> | <b>Pep. Count</b> | <b>Protein Score</b> | <b>Protein Score</b> | <b>Total Ion Score</b> | <b>Total Ion C. I. %</b>                 | <b>Spectra</b> | <b>8</b>           |
| 1                                                                                                        | transcription termination factor Rho [Mycobacterium | glt11847197          | 71704.7           | 6.71              | 24                | 158                  | 100                  |                        |                                          |                |                    |
| <b>Peptide Information</b>                                                                               |                                                     |                      |                   |                   |                   |                      |                      |                        |                                          |                |                    |
| <b>Calc. Mass</b>                                                                                        | <b>Obsrv. Mass</b>                                  | <b>± da</b>          | <b>± ppm</b>      | <b>Start Seq.</b> | <b>End Seq.</b>   | <b>Sequence</b>      | <b>Ion Score</b>     | <b>C. I. %</b>         | <b>Modification</b>                      | <b>Rank</b>    | <b>Result Type</b> |
| 861.494                                                                                                  | 861.4823                                            | -0.0117              | -14               | 369               | 376               | KRPEFGK              |                      |                        |                                          |                | Mascot             |
| 870.4679                                                                                                 | 870.5305                                            | 0.0626               | 72                | 112               | 120               | QAGAPVAEK            |                      |                        |                                          |                | Mascot             |
| 870.4679                                                                                                 | 870.5305                                            | 0.0626               | 72                | 112               | 120               | QAGAPVAEK            |                      |                        |                                          |                | Mascot             |
| 1001.5486                                                                                                | 1001.5614                                           | 0.0128               | 13                | 325               | 334               | RGDVAVTAVR           |                      |                        |                                          |                | Mascot             |
| 1097.5742                                                                                                | 1097.5573                                           | -0.0169              | -16               | 48                | 61                | GVNVEASLRR           |                      |                        |                                          |                | Mascot             |
| 1100.6058                                                                                                | 1100.5905                                           | -0.0153              | -14               | 369               | 393               | LRLETSPER            |                      |                        |                                          |                | Mascot             |
| 1102.5891                                                                                                | 1102.5742                                           | -0.0149              | -14               | 376               | 384               | LTPLYNRR             |                      |                        |                                          |                | Mascot             |
| 1102.5891                                                                                                | 1102.5742                                           | -0.0149              | -14               | 376               | 384               | LTPLYNRR             | 18                   | 0                      |                                          |                | Mascot             |
| 1107.5177                                                                                                | 1107.5084                                           | -0.0093              | -8                | 510               | 520               | AYNNASPSGR           |                      |                        |                                          |                | Mascot             |
| 1165.7052                                                                                                | 1165.7242                                           | 0.019                | 16                | 408               | 418               | GQRALVSPPK           |                      |                        |                                          |                | Mascot             |
| 1165.7052                                                                                                | 1165.7242                                           | 0.019                | 16                | 408               | 418               | GQRALVSPPK           |                      |                        |                                          |                | Mascot             |
| 1327.6862                                                                                                | 1327.6654                                           | -0.0208              | -16               | 645               | 651               | VNVEFLVQGR           |                      |                        |                                          |                | Mascot             |
| 1355.7063                                                                                                | 1356.6905                                           | -0.0259              | -19               | 591               | 603               | VFPADVNVPSGTR        |                      |                        |                                          |                | Mascot             |
| 1403.7562                                                                                                | 1403.7301                                           | -0.0261              | -19               | 32                | 44                | SASLSTMVLEPLR        |                      |                        |                                          |                | Mascot             |
| 1419.7512                                                                                                | 1419.7244                                           | -0.0268              | -19               | 32                | 44                | SASLSTMVLEPLR        |                      |                        | Oxidation (M[7])                         |                | Mascot             |
| 1429.8009                                                                                                | 1429.7726                                           | -0.0283              | -20               | 422               | 434               | TTLQDIANTR           |                      |                        |                                          |                | Mascot             |
| 1514.8074                                                                                                | 1514.7772                                           | -0.0302              | -20               | 590               | 603               | RVPFADVNVPSGTR       |                      |                        |                                          |                | Mascot             |
| 1656.746                                                                                                 | 1656.7128                                           | -0.0332              | -20               | 172               | 187               | AAEAPGAGESQGR        |                      |                        |                                          |                | Mascot             |
| 1673.9221                                                                                                | 1673.8881                                           | -0.034               | -20               | 521               | 536               | ILSGVDSTALYPNRR      |                      |                        |                                          |                | Mascot             |
| 1702.7488                                                                                                | 1702.7097                                           | -0.0391              | -23               | 219               | 233               | SERDDQGGQGGQGR       |                      |                        |                                          |                | Mascot             |
| 1854.0007                                                                                                | 1853.968                                            | -0.0427              | -23               | 604               | 610               | KDELLSPDEFVWIK       |                      |                        |                                          |                | Mascot             |
| 1884.0891                                                                                                | 1884.0376                                           | -0.0515              | -23               | 480               | 506               | LVESGGKDWLLDSTR      |                      |                        |                                          |                | Mascot             |
| 2073.9731                                                                                                | 2073.9256                                           | -0.0475              | -23               | 301               | 319               | TSQYLGGPNVYYSMM      |                      |                        |                                          |                | Mascot             |



| Rank                                                                                 | Protein Name                                                                | Accession No. | Protein MW | Protein PI | Peptide Count | Protein Score       | Protein Score | Total Ion Score | Total Ion Score                                     | C. I. % | Modification | Rank | Result Type |
|--------------------------------------------------------------------------------------|-----------------------------------------------------------------------------|---------------|------------|------------|---------------|---------------------|---------------|-----------------|-----------------------------------------------------|---------|--------------|------|-------------|
| 1                                                                                    | transcription termination factor Rho [Mycobacterium smegmatis str. MC2 155] | gi118471197   | 71704.7    | 6.71       | 26            | 327                 | 100           | 238             | 100                                                 |         |              |      |             |
| Peptide Information                                                                  |                                                                             |               |            |            |               |                     |               |                 |                                                     |         |              |      |             |
| Calc. Mass                                                                           | Obsrv. Mass                                                                 | ± da          | ± ppm      | Start Seq. | End Seq.      | Sequence            | Ion           | C. I. %         | Modification                                        | Rank    | Result Type  |      |             |
| 861.494                                                                              | 861.4862                                                                    | -0.0078       | -9         | 369        | 374           | KRPEFOK             |               |                 |                                                     |         |              |      | Mascot      |
| 870.4670                                                                             | 870.5341                                                                    | 0.0663        | 76         | 112        | 120           | QAGAPVAEK           | 5             | 0               |                                                     |         |              |      | Mascot      |
| 870.4670                                                                             | 870.5341                                                                    | 0.0663        | 76         | 112        | 120           | QAGAPVAEK           | 5             | 0               |                                                     |         |              |      | Mascot      |
| 1001.5486                                                                            | 1001.5644                                                                   | 0.0158        | 16         | 325        | 334           | RGDAVITGAVR         |               |                 |                                                     |         |              |      | Mascot      |
| 1087.5742                                                                            | 1087.5667                                                                   | -0.0075       | -7         | 49         | 59            | EIGVEGASGLR         |               |                 |                                                     |         |              |      | Mascot      |
| 1103.6298                                                                            | 1103.6377                                                                   | 0.0079        | 7          | 383        | 393           | LRLETSPER           |               |                 |                                                     |         |              |      | Mascot      |
| 1102.5891                                                                            | 1102.5808                                                                   | -0.0083       | -8         | 376        | 384           | LTPLYPNER           |               |                 |                                                     |         |              |      | Mascot      |
| 1102.5891                                                                            | 1102.5808                                                                   | -0.0083       | -8         | 376        | 384           | LTPLYPNER           | 26            | 0               |                                                     |         |              |      | Mascot      |
| 1107.5177                                                                            | 1107.5112                                                                   | -0.0065       | -6         | 510        | 520           | AYNNASPASGR         |               |                 |                                                     |         |              |      | Mascot      |
| 1165.7052                                                                            | 1165.7329                                                                   | 0.0277        | 24         | 408        | 416           | GQRALVSPKK          |               |                 |                                                     |         |              |      | Mascot      |
| 1229.71                                                                              | 1229.6971                                                                   | -0.0129       | -10        | 489        | 509           | DRVILVLSITR         |               |                 |                                                     |         |              |      | Mascot      |
| 1327.6892                                                                            | 1327.6702                                                                   | -0.019        | -14        | 645        | 655           | TNYEFLVQVSK         |               |                 |                                                     |         |              |      | Mascot      |
| 1358.7063                                                                            | 1358.6932                                                                   | -0.0131       | -10        | 591        | 603           | VFPADVNPSSGTR       |               |                 |                                                     |         |              |      | Mascot      |
| 1403.7562                                                                            | 1403.7416                                                                   | -0.0146       | -10        | 32         | 41            | SASLSTMVPELR        |               |                 |                                                     |         |              |      | Mascot      |
| 1418.7512                                                                            | 1419.7369                                                                   | 0.0143        | 10         | 32         | 41            | SASLSTMVPELR        |               |                 | Oxidation (M)[7]                                    |         |              |      | Mascot      |
| 1429.8093                                                                            | 1429.7853                                                                   | -0.024        | -10        | 423        | 431           | STLEGANATR          |               |                 |                                                     |         |              |      | Mascot      |
| 1514.8074                                                                            | 1514.7861                                                                   | -0.0213       | -14        | 590        | 603           | RVFPADVNPSSGTR      |               |                 |                                                     |         |              |      | Mascot      |
| 1656.746                                                                             | 1656.7239                                                                   | -0.0221       | -13        | 172        | 187           | AAEAPFAGESEDSQPR    |               |                 |                                                     |         |              |      | Mascot      |
| 1673.9221                                                                            | 1673.8937                                                                   | -0.0284       | -17        | 521        | 536           | ILSGGVDSTALVPPKR    |               |                 |                                                     |         |              |      | Mascot      |
| 1702.7488                                                                            | 1702.7273                                                                   | -0.0215       | -13        | 219        | 233           | SERDQDQGGGQGNR      |               |                 |                                                     |         |              |      | Mascot      |
| 1854.0007                                                                            | 1853.9869                                                                   | -0.0138       | -17        | 684        | 619           | KDGLLSDFEFPAHK      |               |                 |                                                     |         |              |      | Mascot      |
| 1884.0601                                                                            | 1884.0631                                                                   | 0.003         | 14         | 490        | 506           | LVEDGKDVVLLDSITR    |               |                 |                                                     |         |              |      | Mascot      |
| 1993.7874                                                                            | 1993.9427                                                                   | 0.1553        | 78         | 521        | 536           | ILSGGVDSTALVPPKR    |               |                 | Phospho (ST)[3,8], Phospho (ST)[9], Phospho (Y)[12] |         |              |      | Mascot      |
| 2073.9731                                                                            | 2073.9404                                                                   | -0.0327       | -16        | 301        | 319           | TSGYLAGPNDVYVSMNM   |               |                 |                                                     |         |              |      | Mascot      |
| 2078.1604                                                                            | 2078.1296                                                                   | -0.0308       | -15        | 623        | 641           | VLSGLDISHQADLLLSQLR |               |                 |                                                     |         |              |      | Mascot      |
| 2078.1604                                                                            | 2078.1296                                                                   | -0.0308       | -15        | 623        | 641           | VLSGLDISHQADLLLSQLR | 73            | 99.877          |                                                     |         |              |      | Mascot      |
| 2078.1604                                                                            | 2078.1296                                                                   | -0.0308       | -15        | 623        | 641           | VLSGLDISHQADLLLSQLR |               |                 |                                                     |         |              |      | Mascot      |
| 2089.9683                                                                            | 2089.9331                                                                   | -0.0349       | -17        | 301        | 319           | TSGYLAGPNDVYVSMNM   |               |                 | Oxidation (M)[15]                                   |         |              |      | Mascot      |
| 2105.9629                                                                            | 2105.9214                                                                   | -0.0415       | -20        | 301        | 319           | TSGYLAGPNDVYVSMNM   |               |                 | Oxidation (M)[15,17]                                |         |              |      | Mascot      |
| 2206.2554                                                                            | 2206.2178                                                                   | -0.0376       | -17        | 623        | 642           | VLSGLDISHQADLLLSQLR |               |                 |                                                     |         |              |      | Mascot      |
| 2297.0044                                                                            | 2297.1589                                                                   | 0.1545        | 67         | 645        | 664           | TNYEFLVQVSKTPAGSM   |               |                 | Oxidation (M)[17], Phospho (Y)[3]                   |         |              |      | Mascot      |
| 2398.1116                                                                            | 2398.0706                                                                   | -0.041        | -17        | 78         | 102           | TAEASSPATADAQTGEO   |               |                 |                                                     |         |              |      | Mascot      |
| 2398.1116                                                                            | 2398.0706                                                                   | -0.041        | -17        | 78         | 102           | TAEASSPATADAQTGEO   | 165           | 100             |                                                     |         |              |      | Mascot      |
| 2710.343                                                                             | 2710.2959                                                                   | -0.0471       | -17        | 462        | 486           | GEVIASFDRPPSDHTQA   |               |                 |                                                     |         |              |      | Mascot      |
| 2910.3542                                                                            | 2910.3025                                                                   | -0.0517       | -18        | 435        | 458           | NNPECHLMVLLVDERPE   |               |                 | Carbamidomethyl (C)[5]                              |         |              |      | Mascot      |
| 2949.2939                                                                            | 2949.29                                                                     | -0.0039       | -1         | 435        | 458           | NNPECHLMVLLVDERPE   |               |                 | Oxidation (M)[8], Phospho (ST)[20]                  |         |              |      | Mascot      |
| Gel Idx/Pos 36/B9 Instr./Gel Origin BA2060/121107A Process Status Analysis Succeeded |                                                                             |               |            |            |               |                     |               |                 |                                                     |         |              |      |             |
| Plate (#) Name (U) 131598 Instrument Sample Name                                     |                                                                             |               |            |            |               |                     |               |                 |                                                     |         |              |      |             |
| Rank                                                                                 | Protein Name                                                                | Accession No. | Protein MW | Protein PI | Peptide Count | Protein Score       | Protein Score | Total Ion Score | Total Ion Score                                     | C. I. % | Modification | Rank | Result Type |
| 1                                                                                    | nitidine ammonia-lyase [Mycobacterium smegmatis str. MC2 155]               | gi118471752   | 53354.7    | 5.86       | 21            | 776                 | 100           | 746             | 100                                                 |         |              |      |             |
| Peptide Information                                                                  |                                                                             |               |            |            |               |                     |               |                 |                                                     |         |              |      |             |
| Calc. Mass                                                                           | Obsrv. Mass                                                                 | ± da          | ± ppm      | Start Seq. | End Seq.      | Sequence            | Ion           | C. I. %         | Modification                                        | Rank    | Result Type  |      |             |
| 821.4628                                                                             | 821.4951                                                                    | 0.0323        | 39         | 69         | 76            | HVAPELR             |               |                 |                                                     |         |              |      | Mascot      |
| 904.4958                                                                             | 904.4536                                                                    | -0.0422       | -47        | 255        | 262           | TSASNLRR            |               |                 |                                                     |         |              |      | Mascot      |
| 1020.4857                                                                            | 1020.47                                                                     | -0.0157       | -15        | 475        | 484           | DHVAGGPR            |               |                 |                                                     |         |              |      | Mascot      |
| 1210.5811                                                                            | 1210.5858                                                                   | 0.0047        | 4          | 85         | 85            | SHAGDTGFEVER        |               |                 |                                                     |         |              |      | Mascot      |
| 1283.7682                                                                            | 1283.75                                                                     | -0.0182       | -14        | 441        | 452           | NVLAIELTAAR         | 65            | 97.388          |                                                     |         |              |      | Mascot      |
| 1283.7682                                                                            | 1283.75                                                                     | -0.0182       | -14        | 441        | 452           | NVLAIELTAAR         |               |                 |                                                     |         |              |      | Mascot      |
| 1342.6783                                                                            | 1342.6614                                                                   | -0.0169       | -13        | 263        | 271           | LLADSAMESHR         |               |                 |                                                     |         |              |      | Mascot      |
| 1360.708                                                                             | 1360.6805                                                                   | -0.0275       | -20        | 472        | 484           | ALRDHVAGGPR         |               |                 |                                                     |         |              |      | Mascot      |
| 1586.7373                                                                            | 1580.7395                                                                   | -5.9978       | -38        | 275        | 285           | GRDCTVVDGAVLSIR     |               |                 | Carbamidomethyl (C)[4]                              |         |              |      | Mascot      |
| 1586.9012                                                                            | 1586.8781                                                                   | -0.0231       | -17        | 8          | 23            | VGVGRLPSSDVLHVAR    |               |                 |                                                     |         |              |      | Mascot      |
| 1586.9012                                                                            | 1586.8735                                                                   | -0.0277       | -17        | 8          | 23            | VGVGRLPSSDVLHVAR    | 92            | 99.994          |                                                     |         |              |      | Mascot      |
| 1594.7407                                                                            | 1594.7233                                                                   | -0.0174       | -11        | 262        | 271           | RLADSAMESHR         |               |                 | Oxidation (M)[9], Phospho (ST)[6]                   |         |              |      | Mascot      |
| 1675.8762                                                                            | 1675.8447                                                                   | -0.0315       | -19        | 311        | 326           | ELAAAVDNPVLLHDGR    |               |                 |                                                     |         |              |      | Mascot      |
| 1675.8762                                                                            | 1675.8447                                                                   | -0.0315       | -19        | 311        | 326           | ELAAAVDNPVLLHDGR    | 88            | 99.984          |                                                     |         |              |      | Mascot      |
| 1904.9109                                                                            | 1894.8784                                                                   | -10.0325      | -53        | 221        | 236           | TADIAAAMSVEALLGSTR  |               |                 |                                                     |         |              |      | Mascot      |
| 1819.9562                                                                            | 1819.9235                                                                   | -0.0327       | -18        | 239        | 254           | VFADLQALRPHPGQR     | 53            | 57.044          |                                                     |         |              |      | Mascot      |
| 1819.9562                                                                            | 1819.9235                                                                   | -0.0327       | -18        | 239        | 254           | VFADLQALRPHPGQR     |               |                 |                                                     |         |              |      | Mascot      |
| 1915.8828                                                                            | 1915.8469                                                                   | -0.0359       | -19        | 289        | 305           | CSPQVHGAAHDTLEHTR   |               |                 | Carbamidomethyl (C)[1]                              |         |              |      | Mascot      |
| 2550.3521                                                                            | 2550.3022                                                                   | -0.0499       | -20        | 167        | 192           | DASGTLRPAADLAAALD   |               |                 |                                                     |         |              |      | Mascot      |
| 2550.3521                                                                            | 2550.3022                                                                   | -0.0499       | -20        | 167        | 192           | DASGTLRPAADLAAALD   | 158           | 100             |                                                     |         |              |      | Mascot      |
| 2589.3306                                                                            | 2589.2791                                                                   | -0.0515       | -20        | 43         | 68            | DAVEQLAQAPVPAYGV    | 224           | 100             |                                                     |         |              |      | Mascot      |
| 2589.3306                                                                            | 2589.2791                                                                   | -0.0515       | -20        | 43         | 68            | DAVEQLAQAPVPAYGV    |               |                 |                                                     |         |              |      | Mascot      |
| 2832.4639                                                                            | 2832.4084                                                                   | -0.0555       | -20        | 41         | 68            | SRDAVEQLAQAPVPAYG   | 67            | 98.059          |                                                     |         |              |      | Mascot      |
| 2832.4639                                                                            | 2832.4084                                                                   | -0.0555       | -20        | 41         | 68            | SRDAVEQLAQAPVPAYG   |               |                 |                                                     |         |              |      | Mascot      |
| 2904.3979                                                                            | 2904.3511                                                                   | -0.0468       | -16        | 283        | 288           | LLADSAMESHRGPDCTV   |               |                 | Carbamidomethyl (C)[16]                             |         |              |      | Mascot      |
| 2917.3455                                                                            | 2917.2859                                                                   | -0.0596       | -20        | 403        | 430           | LATPASVDSIPSSAMQED  |               |                 |                                                     |         |              |      | Mascot      |
| 2933.3403                                                                            | 2933.2827                                                                   | -0.0576       | -20        | 403        | 430           | LATPASVDSIPSSAMQED  |               |                 | Oxidation (M)[15]                                   |         |              |      | Mascot      |
| 2949.3352                                                                            | 2949.2842                                                                   | -0.051        | -17        | 403        | 430           | LATPASVDSIPSSAMQED  |               |                 | Oxidation (M)[15,22]                                |         |              |      | Mascot      |
| 2979.2488                                                                            | 2979.4312                                                                   | 0.1824        | 61         | 139        | 166           | EYGLSCGSDLAPLHC     |               |                 | Phospho (ST)[4], Phospho (Y)[2]                     |         |              |      | Mascot      |

| Gel Idx/Pos         |                                                                        | 37/B10        |            | Instr./Gel Origin      |          | BA2060/121107A     |         | Process Status |                                       | Analysis Succeeded |             |
|---------------------|------------------------------------------------------------------------|---------------|------------|------------------------|----------|--------------------|---------|----------------|---------------------------------------|--------------------|-------------|
| Plate (#)           | Name                                                                   | [1] 31598     |            | Instrument Sample Name |          |                    |         | Spectra        |                                       | 8                  |             |
| Rank                | Protein Name                                                           | Accession No. | Protein MW | Protein                | Pep.     | Protein            | Protein | Total Ion      | Total Ion                             | C. I. %            |             |
|                     |                                                                        |               |            | PI                     | Count    | Score              | Score   | Score          | C. I. %                               |                    |             |
| 1                   | hypothetical protein MSMEG_5010 [Mycobacterium smegmatis str. MC2 155] | gi118469659   | 19502.0    | 6                      | 16       | 514                | 100     | 425            | 100                                   |                    |             |
| Peptide Information |                                                                        |               |            |                        |          |                    |         |                |                                       |                    |             |
| Calc. Mass          | Obsrv. Mass                                                            | ± da          | ± ppm      | Start Seq.             | End Seq. | Sequence           | Ion     | C. I. %        | Modification                          | Rank               | Result Type |
| 892.400             | 892.5545                                                               | 0.1465        | 165        | 477                    | 484      | TAVDALGR           |         |                | Phospho (ST)11                        |                    | Mascot      |
| 1675.8762           | 1675.8447                                                              | -0.0315       | -19        | 324                    | 330      | ELAAAVDNPVVLHDGR   |         |                |                                       |                    | Mascot      |
| 1675.8762           | 1675.8447                                                              | -0.0315       | -19        | 324                    | 330      | ELAAAVDNPVVLHDGR   | 88      | 99.984         |                                       |                    | Mascot      |
| 2799.4487           | 2799.2385                                                              | -0.2102       | -75        | 252                    | 276      | VLAPELHAVRPHPGQAA  |         |                | Phospho (ST)23                        |                    | Mascot      |
| 2933.3186           | 2933.2827                                                              | -0.0359       | -12        | 10                     | 36       | TLLNMDMHTVVVGTSGT  |         |                | Phospho (ST)1,9                       |                    | Mascot      |
| 2949.3135           | 2949.2842                                                              | -0.0293       | -10        | 10                     | 36       | TLLNMDMHTVVVGTSGT  |         |                | Oxidation (M)9, Phospho (ST)1,9       |                    | Mascot      |
| 2979.1667           | 2979.4312                                                              | 0.2645        | 89         | 56                     | 81       | SIVDTLAATPEPVYGVST |         |                | Phospho (ST)1,17, Phospho (ST)5,9     |                    | Mascot      |
|                     |                                                                        |               |            |                        |          | GFGLASR            |         |                | Phospho (Y)14                         |                    |             |
| 2                   | hypothetical protein MmcS_3943 [Mycobacterium sp. MCS]                 | gi10880907    | 22579.4    | 5.89                   | 6        | 123                | 100     | 105            | 100                                   |                    |             |
| Peptide Information |                                                                        |               |            |                        |          |                    |         |                |                                       |                    |             |
| Calc. Mass          | Obsrv. Mass                                                            | ± da          | ± ppm      | Start Seq.             | End Seq. | Sequence           | Ion     | C. I. %        | Modification                          | Rank               | Result Type |
| 917.4331            | 917.4154                                                               | -0.0177       | -19        | 12                     | 18       | CNHVIMK            |         |                | Carbamidomethyl (C)11, Oxidation (M)6 |                    | Mascot      |
| 956.4761            | 956.5776                                                               | 0.1015        | 102        | 66                     | 73       | EETVIGR            |         |                | Phospho (ST)4                         |                    | Mascot      |
| 1004.5159           | 1004.4965                                                              | -0.0194       | -19        | 165                    | 173      | SDALAWSVR          | 45      | 0              |                                       |                    | Mascot      |
| 1004.5159           | 1004.4965                                                              | -0.0194       | -19        | 165                    | 173      | SDALAWSVR          |         |                |                                       |                    | Mascot      |
| 1247.6492           | 1247.6222                                                              | -0.027        | -22        | 183                    | 173      | SRSDALAWSVR        | 60      | 92.904         |                                       |                    | Mascot      |
| 1247.6492           | 1247.6222                                                              | -0.027        | -22        | 183                    | 173      | SRSDALAWSVR        |         |                |                                       |                    | Mascot      |
| 1356.7482           | 1356.7175                                                              | -0.0307       | -23        | 150                    | 162      | QVLDLTVDAVGAR      |         |                |                                       |                    | Mascot      |
| 1577.8274           | 1577.7028                                                              | -0.1246       | -79        | 131                    | 143      | ILFTHIAPVMTIR      |         |                | Phospho (ST)4                         |                    | Mascot      |
| 1593.8223           | 1593.8909                                                              | -0.0686       | -20        | 371                    | 402      | GLPPFLADDPGVDSGHM  |         |                | Oxidation (M)11, Phospho (ST)4        |                    | Mascot      |

Table S3: Mass Spectrometry Analysis

| NCBI        |                   |               |                                                                                                   |               |            |            |            |               |                    |                 |                 |
|-------------|-------------------|---------------|---------------------------------------------------------------------------------------------------|---------------|------------|------------|------------|---------------|--------------------|-----------------|-----------------|
| Spot number | MALDI well number | Match Quality | Top Ranked Protein Name (Species)                                                                 | Accession No. | Protein MW | Protein pI | Peq. Count | Protein score | Protein Score c.1% | Total Ion Score | Total Ion C.I.% |
| 4           | G21               |               | ATP synthase subunit beta OS-Mycobacterium smegmatis (strain ATCC 700084 / mc2)155) GN=apd PE=1 G | ATPB_MYCS2    | 51,584     | 4.8        | 5          | 26            | 0                  | 26              | 99              |
| 9           | G22               |               | transcription termination factor Rho Mycobacterium smegmatis str. MC2 155)                        | gi11847197    | 17,705     | 6.7        | 25         | 282           | 100                | 195             | 100             |
| 11          | G23               |               | 1-deoxy-D-xylulose-5-phosphate synthase OS-Mycobacterium smegmatis (strain ATCC 700084 / mc2)155) | DXS_MYCS2     | 67,993     | 5.7        | 5          | 19            | 0                  | 19              | 96              |
| 14          | G24               |               | negative regulator of genetic competence CpcMedB [Mycobacterium smegmatis str. MC2 155]           | gi118472509   | 93,496     | 5.5        | 41         | 688           | 100                | 550             | 100             |
| 15          | H1                |               | isocitrate dehydrogenase [Mycobacterium smegmatis str. MC2 155]                                   | gi118467432   | 82,552     | 5.6        | 33         | 271           | 100                | 193             | 100             |
| 16          | H2                |               | ribonucleotide-diphosphate reductase subunit alpha [Mycobacterium smegmatis str. MC2 155]         | gi118463034   | 80,496     | 5.7        | 28         | 344           | 100                | 276             | 100             |
| 20          | H3                |               | metalloproteinase [Mycobacterium smegmatis str. MC2 155]                                          | gi118467687   | 74,084     | 4.8        | 34         | 718           | 100                | 615             | 100             |
| 22          | H4                |               | 1-pyrimidine-5-carboxylate dehydrogenase [Mycobacterium smegmatis str. MC2 155]                   | gi118469637   | 58,397     | 5.5        | 24         | 700           | 100                | 615             | 100             |
| 27          | H5                |               | ATP-dependent ma helicase, dead-end box family protein [Mycobacterium smegmatis str. MC2 155]     | gi118470234   | 63,685     | 7.3        | 20         | 252           | 100                | 217             | 100             |
| 44          | H6                |               | acyl-CoA acyltransferase [Mycobacterium smegmatis str. MC2 155]                                   | gi118468168   | 45,201     | 6.13       | 12         | 225           | 100                | 221             | 100             |
| 53          | H7                |               | S30AE family protein [Mycobacterium smegmatis str. MC2 155]                                       | gi118473146   | 26,382     | 6.27       | 15         | 253           | 100                | 217             | 100             |
| 70          | H8                |               | hypothetical protein MSMEG_5010 [Mycobacterium smegmatis str. MC2 155]                            | gi118469659   | 19,503     | 6.0        | 18         | 426           | 100                | 293             | 100             |
| Control     |                   |               |                                                                                                   |               |            |            |            |               |                    |                 |                 |
| 1 fmoI      | H9                |               | Beta-galactosidase OS-Escherichia coli O127:H6 (strain E2349/69 / EPEC) GN=lacZ PE=3 SV=1         | BGAL_EC027    | 116,343    | 5.2        | 22         | 312           | 100                | 209             | 100             |
| 2 fmoI      | H10               |               | Beta-galactosidase OS-Escherichia coli O127:H6 (strain E2349/69 / EPEC) GN=lacZ PE=3 SV=1         | BGAL_EC027    | 116,343    | 5.2        | 23         | 490           | 100                | 388             | 100             |
| 5 fmoI      | H11               |               | Beta-galactosidase OS-Escherichia coli (strain K12) GN=lacZ PE=1 SV=2                             | BGAL_ECOL1    | 116,409    | 5.3        | 24         | 492           | 100                | 377             | 100             |
| 10 fmoI     | H12               |               | Beta-galactosidase OS-Escherichia coli (strain K12) GN=lacZ PE=1 SV=2                             | BGAL_ECOL1    | 116,409    | 5.3        | 25         | 520           | 100                | 391             | 100             |

high confidence  
 low confidence  
 no confidence

| 2012_11                |                                                                                                    |                                 |             |            |                             |               |                        |                    |                     |                 |                                             |                 |                 |                   |                   |                   |                    |  |
|------------------------|----------------------------------------------------------------------------------------------------|---------------------------------|-------------|------------|-----------------------------|---------------|------------------------|--------------------|---------------------|-----------------|---------------------------------------------|-----------------|-----------------|-------------------|-------------------|-------------------|--------------------|--|
| MAVA121113             |                                                                                                    |                                 |             |            |                             |               |                        |                    |                     |                 |                                             |                 |                 |                   |                   |                   |                    |  |
| Analysis Information   |                                                                                                    |                                 |             |            |                             |               |                        |                    |                     |                 |                                             |                 |                 |                   |                   |                   |                    |  |
| Report Type            |                                                                                                    | Protein-Peptide Summary by Spot |             |            |                             |               | Analysis Type          |                    | Combined (MS+MS/MS) |                 |                                             |                 |                 |                   |                   |                   |                    |  |
| Sample Set Name        |                                                                                                    | MAVA121113                      |             |            |                             |               | Database               |                    | NCBI nr             |                 |                                             |                 |                 |                   |                   |                   |                    |  |
| Analysis Name          |                                                                                                    | M.Smeagmatis P                  |             |            |                             |               | Creation Date          |                    |                     |                 |                                             |                 |                 |                   |                   |                   |                    |  |
| Reported By            |                                                                                                    |                                 |             |            |                             |               | Last Modified          |                    |                     |                 |                                             |                 |                 |                   |                   |                   |                    |  |
| MS Acq.: Proc. Methods |                                                                                                    |                                 |             |            | (Unspecified) (Unspecified) |               |                        |                    |                     |                 |                                             |                 |                 |                   |                   |                   |                    |  |
| Interpretation Method  |                                                                                                    |                                 |             |            | (Unspecified)               |               |                        |                    |                     |                 |                                             |                 |                 |                   |                   |                   |                    |  |
| Gel Idx/Pos            |                                                                                                    | 170/G21                         |             |            |                             |               | Instr./Gel Origin      |                    |                     |                 |                                             | BA2060/12115A   |                 |                   | Process Status    |                   | Analysis Succeeded |  |
| Plate [6] Name         |                                                                                                    | [1] 31598                       |             |            |                             |               | Instrument Sample Name |                    |                     |                 |                                             |                 |                 |                   | Spectra           |                   | 11                 |  |
| Rank                   | Protein Name                                                                                       | Accession No.                   | Protein MW  | Protein PI | Peptide Count               | Protein Score | Protein Score          | Protein Score      | Protein Score       | Total Ion Score | Total Ion Score                             | Total Ion Score | Total Ion Score | Total Ion C. I. % | Total Ion C. I. % | Total Ion C. I. % | Total Ion C. I. %  |  |
| 1                      | ATP synthase subunit beta OS=Mycobacterium smegmatis (strain ATCC 7000847 mc2[155]) GN=atpD PE=1 S | ATPB_MYCS2                      | 51584.4     | 4.84       | 5                           | 26            | 0                      | 26                 | 0                   | 26              | 98.682                                      |                 |                 |                   |                   |                   |                    |  |
| Peptide Information    |                                                                                                    | Calc. Mass                      | Obsrv. Mass | ± da       | ± ppm                       | Start Seq.    | End Seq.               | Sequence           | Ion Score           | C. I. %         | Modification                                | Rank            | Result Type     |                   |                   |                   |                    |  |
|                        |                                                                                                    | 856.5111                        | 856.483     | -0.0281    | -33                         | 400           | 406                    | QLVNRAR            |                     |                 |                                             |                 | Mascot          |                   |                   |                   |                    |  |
|                        |                                                                                                    | 870.4879                        | 870.4983    | 0.0094     | 83                          | 234           | 320                    | ITSTRGR            | 15                  | 81.297          | Phospho (ST)[3]                             |                 | Mascot          |                   |                   |                   |                    |  |
|                        |                                                                                                    | 870.4183                        | 870.4999    | 0.0806     | 93                          | 234           | 300                    | ITSTRGR            |                     |                 | Phospho (ST)[2]                             |                 | Mascot          |                   |                   |                   |                    |  |
|                        |                                                                                                    | 1165.465                        | 1165.8904   | 0.2254     | 193                         | 2             | 11                     | TATAEKTAGR         | 12                  | 62.51           | Phospho (ST)[3,7]                           |                 | Mascot          |                   |                   |                   |                    |  |
|                        |                                                                                                    | 1165.465                        | 1165.8904   | 0.2254     | 193                         | 2             | 11                     | TATAEKTAGR         |                     |                 | Phospho (ST)[1,3]                           |                 | Mascot          |                   |                   |                   |                    |  |
|                        |                                                                                                    | 1334.6157                       | 1334.8275   | 0.2118     | 159                         | 143           | 152                    | VVDLLTPYVR         |                     |                 | Phospho (ST)[6], Phospho (Y)[8]             |                 | Mascot          |                   |                   |                   |                    |  |
|                        |                                                                                                    | 2283.1929                       | 2283.0503   | -0.1426    | -62                         | 156           | 176                    | IALFGGAGVGKTVLIQEM |                     |                 | Oxidation (M)[18], Phospho (ST)[12]         |                 | Mascot          |                   |                   |                   |                    |  |
|                        |                                                                                                    | 2283.1929                       | 2283.0503   | -0.1426    | -62                         | 156           | 176                    | IALFGGAGVGKTVLIQEM |                     |                 | Oxidation (M)[18], Phospho (ST)[12]         |                 | Mascot          |                   |                   |                   |                    |  |
|                        |                                                                                                    |                                 |             |            |                             |               |                        | NR                 |                     |                 |                                             |                 |                 |                   |                   |                   |                    |  |
|                        |                                                                                                    |                                 |             |            |                             |               |                        | NR                 |                     |                 |                                             |                 |                 |                   |                   |                   |                    |  |
| Gel Idx/Pos            |                                                                                                    | 171/G22                         |             |            |                             |               | Instr./Gel Origin      |                    |                     |                 |                                             | BA2060/12115A   |                 |                   | Process Status    |                   | Analysis Succeeded |  |
| Plate [6] Name         |                                                                                                    | [1] 31598                       |             |            |                             |               | Instrument Sample Name |                    |                     |                 |                                             |                 |                 |                   | Spectra           |                   | 8                  |  |
| Rank                   | Protein Name                                                                                       | Accession No.                   | Protein MW  | Protein PI | Peptide Count               | Protein Score | Protein Score          | Protein Score      | Protein Score       | Total Ion Score | Total Ion Score                             | Total Ion Score | Total Ion Score | Total Ion C. I. % | Total Ion C. I. % | Total Ion C. I. % | Total Ion C. I. %  |  |
| 1                      | transcription termination factor Rho [Mycobacterium smegmatis str. MC2 155]                        | gii118471197                    | 71704.7     | 6.71       | 25                          | 262           | 100                    | 195                | 100                 |                 |                                             |                 |                 |                   |                   |                   |                    |  |
| Peptide Information    |                                                                                                    | Calc. Mass                      | Obsrv. Mass | ± da       | ± ppm                       | Start Seq.    | End Seq.               | Sequence           | Ion Score           | C. I. %         | Modification                                | Rank            | Result Type     |                   |                   |                   |                    |  |
|                        |                                                                                                    | 861.494                         | 861.4538    | -0.0402    | -47                         | 369           | 375                    | KRPEFGK            |                     |                 |                                             |                 | Mascot          |                   |                   |                   |                    |  |
|                        |                                                                                                    | 870.4879                        | 870.4983    | 0.0094     | 37                          | 112           | 120                    | QAGAPVAEK          |                     |                 |                                             |                 | Mascot          |                   |                   |                   |                    |  |
|                        |                                                                                                    | 870.4879                        | 870.5002    | 0.0323     | 37                          | 112           | 120                    | QAGAPVAEK          |                     |                 |                                             |                 | Mascot          |                   |                   |                   |                    |  |
|                        |                                                                                                    | 1000.6149                       | 1000.5636   | -0.0513    | -51                         | 60            | 68                     | KSELAIAIR          |                     |                 |                                             |                 | Mascot          |                   |                   |                   |                    |  |
|                        |                                                                                                    | 1001.5486                       | 1001.5173   | -0.0313    | -31                         | 325           | 334                    | RGDAVTGAVR         |                     |                 |                                             |                 | Mascot          |                   |                   |                   |                    |  |
|                        |                                                                                                    | 1087.5742                       | 1087.5203   | -0.0539    | -50                         | 49            | 59                     | EIGVEGASGLR        |                     |                 |                                             |                 | Mascot          |                   |                   |                   |                    |  |
|                        |                                                                                                    | 1102.5891                       | 1102.5358   | -0.0533    | -48                         | 376           | 384                    | LTPLYPNER          | 17                  | 0               |                                             |                 | Mascot          |                   |                   |                   |                    |  |
|                        |                                                                                                    | 1102.5891                       | 1102.5358   | -0.0533    | -48                         | 376           | 384                    | LTPLYPNER          |                     |                 |                                             |                 | Mascot          |                   |                   |                   |                    |  |
|                        |                                                                                                    | 1107.5177                       | 1107.4714   | -0.0463    | -42                         | 510           | 520                    | AYNNASPASGR        |                     |                 |                                             |                 | Mascot          |                   |                   |                   |                    |  |
|                        |                                                                                                    |                                 |             |            |                             |               |                        |                    |                     |                 |                                             |                 |                 |                   |                   |                   |                    |  |
|                        |                                                                                                    | 1165.7052                       | 1165.8866   | -0.0186    | -16                         | 408           | 418                    | GQRALIVSPPK        |                     |                 |                                             |                 | Mascot          |                   |                   |                   |                    |  |
|                        |                                                                                                    | 1229.71                         | 1229.6475   | -0.0625    | -51                         | 496           | 506                    | DVVVLLDSITR        |                     |                 |                                             |                 | Mascot          |                   |                   |                   |                    |  |
|                        |                                                                                                    | 1327.6892                       | 1327.6201   | -0.0691    | -52                         | 645           | 655                    | TNYEFLVQVSK        |                     |                 |                                             |                 | Mascot          |                   |                   |                   |                    |  |
|                        |                                                                                                    | 1358.7063                       | 1358.6399   | -0.0664    | -49                         | 591           | 603                    | VFPADVVPNSGTR      |                     |                 |                                             |                 | Mascot          |                   |                   |                   |                    |  |
|                        |                                                                                                    | 1403.7562                       | 1403.6883   | -0.0679    | -49                         | 32            | 44                     | SASLSTMLPELR       |                     |                 |                                             |                 | Mascot          |                   |                   |                   |                    |  |
|                        |                                                                                                    | 1419.7512                       | 1419.6788   | -0.0724    | -51                         | 32            | 44                     | SASLSTMLPELR       |                     |                 | Oxidation (M)[7]                            |                 | Mascot          |                   |                   |                   |                    |  |
|                        |                                                                                                    | 1429.8009                       | 1429.7295   | -0.0714    | -50                         | 422           | 434                    | TTILODIANAIR       |                     |                 |                                             |                 | Mascot          |                   |                   |                   |                    |  |
|                        |                                                                                                    | 1429.8009                       | 1429.7295   | -0.0714    | -50                         | 422           | 434                    | TTILODIANAIR       | 44                  | 0               |                                             |                 | Mascot          |                   |                   |                   |                    |  |
|                        |                                                                                                    | 1514.8074                       | 1514.7292   | -0.0782    | -52                         | 590           | 603                    | RVPADVVPNSGTR      |                     |                 |                                             |                 | Mascot          |                   |                   |                   |                    |  |
|                        |                                                                                                    | 1656.746                        | 1656.6627   | -0.0833    | -50                         | 172           | 187                    | AAEAPAGESOESQPR    |                     |                 |                                             |                 | Mascot          |                   |                   |                   |                    |  |
|                        |                                                                                                    | 1702.7488                       | 1702.6627   | -0.0861    | -51                         | 219           | 233                    | SESDQDQGGGSGQNR    |                     |                 |                                             |                 | Mascot          |                   |                   |                   |                    |  |
|                        |                                                                                                    | 1854.0207                       | 1853.9037   | -0.097     | -52                         | 604           | 619                    | KDELLSPDEFVNIHK    |                     |                 |                                             |                 | Mascot          |                   |                   |                   |                    |  |
|                        |                                                                                                    | 1884.0801                       | 1883.986    | -0.0941    | -50                         | 490           | 506                    | LVEGGKDVVLLDSITR   |                     |                 |                                             |                 | Mascot          |                   |                   |                   |                    |  |
|                        |                                                                                                    | 2073.9731                       | 2073.8679   | -0.1052    | -51                         | 301           | 319                    | TSGYLAGPNDVYVSMNM  |                     |                 |                                             |                 | Mascot          |                   |                   |                   |                    |  |
|                        |                                                                                                    |                                 |             |            |                             |               |                        | VR                 |                     |                 |                                             |                 |                 |                   |                   |                   |                    |  |
|                        |                                                                                                    | 2078.1604                       | 2078.0542   | -0.1062    | -51                         | 623           | 641                    | VLSGLDSHOAIDLLSQLR |                     |                 |                                             |                 | Mascot          |                   |                   |                   |                    |  |
|                        |                                                                                                    | 2297.0044                       | 2297.0825   | 0.0781     | 34                          | 645           | 664                    | TNYEFLVQVSKTAPGSM  |                     |                 | Oxidation (M)[17], Phospho (Y)[3]           |                 | Mascot          |                   |                   |                   |                    |  |
|                        |                                                                                                    |                                 |             |            |                             |               |                        | DVD                |                     |                 |                                             |                 |                 |                   |                   |                   |                    |  |
|                        |                                                                                                    | 2298.0293                       | 2298.0725   | 0.0432     | 19                          | 301           | 320                    | TSGYLAGPNDVYVSMNM  |                     |                 | Oxidation (M)[15], Phospho (Y)[4]           |                 | Mascot          |                   |                   |                   |                    |  |
|                        |                                                                                                    |                                 |             |            |                             |               |                        | VRK                |                     |                 |                                             |                 |                 |                   |                   |                   |                    |  |
|                        |                                                                                                    | 2398.1116                       | 2397.99     | -0.1216    | -51                         | 78            | 102                    | TAEASSPATADAQTGEC  |                     |                 |                                             |                 | Mascot          |                   |                   |                   |                    |  |
|                        |                                                                                                    |                                 |             |            |                             |               |                        | AAEAPAPR           |                     |                 |                                             |                 |                 |                   |                   |                   |                    |  |
|                        |                                                                                                    | 2398.1116                       | 2397.99     | -0.1216    | -51                         | 78            | 102                    | TAEASSPATADAQTGEC  | 128                 | 100             |                                             |                 | Mascot          |                   |                   |                   |                    |  |
|                        |                                                                                                    |                                 |             |            |                             |               |                        | AAEAPAPR           |                     |                 |                                             |                 |                 |                   |                   |                   |                    |  |
|                        |                                                                                                    | 2710.343                        | 2710.2104   | -0.1328    | -49                         | 462           | 486                    | GEVIASTFRPPSDHTQA  | 23                  | 0               |                                             |                 | Mascot          |                   |                   |                   |                    |  |
|                        |                                                                                                    |                                 |             |            |                             |               |                        | AELAIAIR           |                     |                 |                                             |                 |                 |                   |                   |                   |                    |  |
|                        |                                                                                                    | 2710.343                        | 2710.2104   | -0.1328    | -49                         | 462           | 486                    | GEVIASTFRPPSDHTQA  |                     |                 |                                             |                 | Mascot          |                   |                   |                   |                    |  |
|                        |                                                                                                    |                                 |             |            |                             |               |                        | AELAIAIR           |                     |                 |                                             |                 |                 |                   |                   |                   |                    |  |
|                        |                                                                                                    | 2910.3542                       | 2910.2083   | -0.1459    | -50                         | 435           | 458                    | NNPECHLMVLDVERPE   |                     |                 | Carbamidomethyl (C)[5]                      |                 | Mascot          |                   |                   |                   |                    |  |
|                        |                                                                                                    |                                 |             |            |                             |               |                        | EVTDMQR            |                     |                 |                                             |                 |                 |                   |                   |                   |                    |  |
| 2                      | transcription termination factor Rho [Mycobacterium leprae Br4923]                                 | gii221230040                    | 66063.6     | 5.31       | 15                          | 58            | 0                      | 44                 | 0                   |                 |                                             |                 |                 |                   |                   |                   |                    |  |
| Peptide Information    |                                                                                                    | Calc. Mass                      | Obsrv. Mass | ± da       | ± ppm                       | Start Seq.    | End Seq.               | Sequence           | Ion Score           | C. I. %         | Modification                                | Rank            | Result Type     |                   |                   |                   |                    |  |
|                        |                                                                                                    | 861.494                         | 861.4538    | -0.0402    | -47                         | 315           | 321                    | KRPEFGK            |                     |                 |                                             |                 | Mascot          |                   |                   |                   |                    |  |
|                        |                                                                                                    |                                 | 861.4538    |            |                             |               |                        |                    |                     |                 |                                             |                 | Mascot          |                   |                   |                   |                    |  |
|                        |                                                                                                    | 1001.5486                       | 1001.5173   | -0.0313    | -31                         | 273           | 282                    | RGDAVTGAVR         |                     |                 |                                             |                 | Mascot          |                   |                   |                   |                    |  |
|                        |                                                                                                    | 1165.7052                       | 1165.8866   | -0.0186    | -16                         | 354           | 364                    | GQRALIVSPPK        |                     |                 |                                             |                 | Mascot          |                   |                   |                   |                    |  |
|                        |                                                                                                    | 1229.71                         | 1229.6475   | -0.0625    | -51                         | 442           | 452                    | DVVVLLDSITR        |                     |                 |                                             |                 | Mascot          |                   |                   |                   |                    |  |
|                        |                                                                                                    | 1327.6892                       | 1327.6201   | -0.0691    | -52                         | 591           | 601                    | TNYEFLVQVSK        |                     |                 |                                             |                 | Mascot          |                   |                   |                   |                    |  |
|                        |                                                                                                    | 1358.7063                       | 1358.6399   | -0.0664    | -49                         | 537           | 549                    | VFPADVVPNSGTR      |                     |                 |                                             |                 | Mascot          |                   |                   |                   |                    |  |
|                        |                                                                                                    | 1429.8009                       | 1429.7295   | -0.0714    | -50                         | 368           | 380                    | TTILODIANAIR       |                     |                 |                                             |                 | Mascot          |                   |                   |                   |                    |  |
|                        |                                                                                                    | 1429.8009                       | 1429.7295   | -0.0714    | -50                         | 368           | 380                    | TTILODIANAIR       | 44                  | 0               |                                             |                 | Mascot          |                   |                   |                   |                    |  |
|                        |                                                                                                    | 1514.8074                       | 1514.7292   | -0.0782    | -52                         | 536           | 549                    | RVPADVVPNSGTR      |                     |                 |                                             |                 | Mascot          |                   |                   |                   |                    |  |
|                        |                                                                                                    | 1884.0801                       | 1883.986    | -0.0941    | -50                         | 436           | 452                    | LVEGGKDVVLLDSITR   |                     |                 |                                             |                 | Mascot          |                   |                   |                   |                    |  |
|                        |                                                                                                    | 2230.063                        | 2230.0942   | 0.0312     | 14                          | 249           | 268                    | TSGYLAGPHDVYVSMNM  |                     |                 | Oxidation (M)[15,17]                        |                 | Mascot          |                   |                   |                   |                    |  |
|                        |                                                                                                    |                                 |             |            |                             |               |                        | VRK                |                     |                 |                                             |                 |                 |                   |                   |                   |                    |  |
|                        |                                                                                                    | 2247.0122                       | 2246.989    | -0.0232    | -10                         | 591           | 610                    | TNYEFLVQVSKTTPGSM  |                     |                 |                                             |                 | Mascot          |                   |                   |                   |                    |  |
|                        |                                                                                                    |                                 |             |            |                             |               |                        | DDD                |                     |                 |                                             |                 |                 |                   |                   |                   |                    |  |
|                        |                                                                                                    | 2384.1445                       | 2383.8267   | -0.3178    | -133                        | 569           | 588                    | VLSGLDSHOAIDLLMSQL |                     |                 | Phospho (ST)[3,7]                           |                 | Mascot          |                   |                   |                   |                    |  |
|                        |                                                                                                    |                                 |             |            |                             |               |                        | RK                 |                     |                 |                                             |                 |                 |                   |                   |                   |                    |  |
|                        |                                                                                                    | 2565.7712                       | 2566.1416   | 0.3704     | 144                         | 249           | 267                    | TSGYLAGPHDVYVSMNM  |                     |                 | Oxidation (M)[15], Phospho (ST)[2,14,16]    |                 | Mascot          |                   |                   |                   |                    |  |
|                        |                                                                                                    |                                 |             |            |                             |               |                        | VR                 |                     |                 | Phospho (ST)[11], Phospho (Y)[4,12]         |                 |                 |                   |                   |                   |                    |  |
|                        |                                                                                                    | 2709.8611                       | 2710.2104   | 0.3493     | 129                         | 249           | 268                    | TSGYLAGPHDVYVSMNM  |                     |                 | Oxidation (M)[15,17], Phospho (ST)[2,14,16] |                 | Mascot          |                   |                   |                   |                    |  |
|                        |                                                                                                    |                                 |             |            |                             |               |                        | VRK                |                     |                 | Phospho (ST)[11], Phospho (Y)[4,12]         |                 |                 |                   |                   |                   |                    |  |
|                        |                                                                                                    | 2709.8611                       | 2710.2104   | 0.3493     | 129                         | 249           | 268                    | TSGYLAGPHDVYVSMNM  |                     |                 | Oxidation (M)[15,17], Phospho (ST)[2,14,16] |                 | Mascot          |                   |                   |                   |                    |  |
|                        |                                                                                                    |                                 |             |            |                             |               |                        | VRK                |                     |                 | Phospho (ST)[11], Phospho (Y)[4,12]         |                 |                 |                   |                   |                   |                    |  |
|                        |                                                                                                    | 3337.3098                       | 3337.5999   | 0.2901     | 87                          | 92            | 120                    | DHGSASIASTEALAAEG  |                     |                 | Phospho (ST)[5,10], Phospho (ST)[7]         |                 | Mascot          |                   |                   |                   |                    |  |
|                        |                                                                                                    |                                 |             |            |                             |               |                        | EONVANVEVSR        |                     |                 | Phospho (Y)[22]                             |                 |                 |                   |                   |                   |                    |  |
| Gel Idx/Pos            |                                                                                                    | 172/G23                         |             |            |                             |               | Instr./Gel Origin      |                    |                     |                 |                                             | BA2060/12115A   |                 |                   | Process Status    |                   | Analysis Succeeded |  |
| Plate [6] Name         |                                                                                                    | [1] 31598                       |             |            |                             |               | Instrument Sample Name |                    |                     |                 |                                             |                 |                 |                   | Spectra           |                   | 8                  |  |
| Rank                   | Protein Name                                                                                       | Accession No.                   | Protein MW  | Protein PI | Peptide Count               | Protein Score | Protein Score          | Protein Score      | Protein Score       | Total Ion Score | Total Ion Score                             | Total Ion Score | Total Ion Score | Total Ion C. I. % | Total Ion C. I. % | Total Ion C. I. % | Total Ion C. I. %  |  |

|                                                             |                                                                                              |               |            |            |               |                    |                 |                   |                                         |                    | C. I. %                         |         |      |    |     |     |     |        |  |  |  |  |
|-------------------------------------------------------------|----------------------------------------------------------------------------------------------|---------------|------------|------------|---------------|--------------------|-----------------|-------------------|-----------------------------------------|--------------------|---------------------------------|---------|------|----|-----|-----|-----|--------|--|--|--|--|
| 1                                                           | 1-deoxy-D-xylulose-5-phosphate synthase                                                      |               |            |            |               |                    |                 |                   |                                         |                    | DXS_MYCS2                       | 67992.9 | 5.7  | 5  | 19  | 0   | 19  | 95.991 |  |  |  |  |
| OS-Mycobacterium smegmatis (strain ATCC 700084 / mcl(2)155) |                                                                                              |               |            |            |               |                    |                 |                   |                                         |                    |                                 |         |      |    |     |     |     |        |  |  |  |  |
| Peptide Information                                         |                                                                                              |               |            |            |               |                    |                 |                   |                                         |                    |                                 |         |      |    |     |     |     |        |  |  |  |  |
| Calc. Mass                                                  | Obsrv. Mass                                                                                  | ± da          | ± ppm      | Start      | End           | Sequence           | Ion             | C. I. %           | Modification                            | Rank               | Result Type                     |         |      |    |     |     |     |        |  |  |  |  |
| Seq.                                                        | Seq.                                                                                         |               |            |            |               |                    | Score           |                   |                                         |                    |                                 |         |      |    |     |     |     |        |  |  |  |  |
| 1102.6289                                                   | 1102.5399                                                                                    | -0.089        | -81        | 514        | 523           | MALAVAEELR         |                 |                   | Oxidation (M)[1]                        |                    | Mascot                          |         |      |    |     |     |     |        |  |  |  |  |
| 1307.6355                                                   | 1307.6167                                                                                    | -0.0188       | -14        | 524        | 535           | SQGIQTVVDPDR       |                 |                   | Phospho (ST)[1]                         |                    | Mascot                          |         |      |    |     |     |     |        |  |  |  |  |
| 2225.0784                                                   | 2225.0132                                                                                    | -0.0652       | -29        | 333        | 353           | DVVAITAAMPGPTGLSAF |                 |                   | Phospho (ST)[6]                         |                    | Mascot                          |         |      |    |     |     |     |        |  |  |  |  |
|                                                             |                                                                                              |               |            |            |               | RDR                |                 |                   |                                         |                    |                                 |         |      |    |     |     |     |        |  |  |  |  |
| 2225.0784                                                   | 2225.0132                                                                                    | -0.0652       | -29        | 333        | 353           | DVVAITAAMPGPTGLSAF | 19              | 95.991            | Phospho (ST)[6]                         |                    | Mascot                          |         |      |    |     |     |     |        |  |  |  |  |
|                                                             |                                                                                              |               |            |            |               | RDR                |                 |                   |                                         |                    |                                 |         |      |    |     |     |     |        |  |  |  |  |
| 2269.9841                                                   | 2269.9272                                                                                    | -0.0569       | -25        | 332        | 351           | RDVVAITAAMPGPTGLSA |                 |                   | Phospho (ST)[17]; Phospho (ST)[7,14]    |                    | Mascot                          |         |      |    |     |     |     |        |  |  |  |  |
|                                                             |                                                                                              |               |            |            |               | FR                 |                 |                   |                                         |                    |                                 |         |      |    |     |     |     |        |  |  |  |  |
| 2720.9126                                                   | 2720.1482                                                                                    | -0.7644       | -281       | 311        | 331           | ASGTSWTSVFSDELISQA |                 |                   | Phospho (S)[2,5,8,11]; Phospho (S)[4,7] |                    | Mascot                          |         |      |    |     |     |     |        |  |  |  |  |
|                                                             |                                                                                              |               |            |            |               | AKR                |                 |                   |                                         |                    |                                 |         |      |    |     |     |     |        |  |  |  |  |
| Gel Idx/Pos 173/G24                                         |                                                                                              |               |            |            |               |                    |                 |                   |                                         |                    | Instr./Gel Origin BA2060/12115A |         |      |    |     |     |     |        |  |  |  |  |
| Plate (6) Name [1] 31598                                    |                                                                                              |               |            |            |               |                    |                 |                   |                                         |                    | Instrument Sample Name          |         |      |    |     |     |     |        |  |  |  |  |
| Rank                                                        | Protein Name                                                                                 | Accession No. | Protein MW | Protein PI | Peptide Count | Protein Score      | Protein C. I. % | Protein Ion Score | Spectra Total Ion C. I. %               | Analysis Succeeded |                                 |         |      |    |     |     |     |        |  |  |  |  |
| 1                                                           | negative regulator of genetic competence CtpC/mecB<br>[Mycobacterium smegmatis str. MC2 155] | gil118472509  | 93496      | 5.45       | 41            | 688                | 100             | 550               | 100                                     |                    |                                 |         |      |    |     |     |     |        |  |  |  |  |
| Peptide Information                                         |                                                                                              |               |            |            |               |                    |                 |                   |                                         |                    |                                 |         |      |    |     |     |     |        |  |  |  |  |
| Calc. Mass                                                  | Obsrv. Mass                                                                                  | ± da          | ± ppm      | Start      | End           | Sequence           | Ion             | C. I. %           | Modification                            | Rank               | Result Type                     |         |      |    |     |     |     |        |  |  |  |  |
| Seq.                                                        | Seq.                                                                                         |               |            |            |               |                    | Score           |                   |                                         |                    |                                 |         |      |    |     |     |     |        |  |  |  |  |
| 812.3798                                                    | 812.3414                                                                                     | -0.0384       | -47        | 366        | 371           | YEAHRR             |                 |                   |                                         |                    | Mascot                          |         |      |    |     |     |     |        |  |  |  |  |
| 829.5141                                                    | 829.4765                                                                                     | -0.0376       | -45        | 87         | 93            | VLELSLR            |                 |                   |                                         |                    | Mascot                          |         |      |    |     |     |     |        |  |  |  |  |
| 832.4709                                                    | 832.4371                                                                                     | -0.0339       | -41        | 200        | 208           | VMQVLSR            |                 |                   |                                         |                    | Mascot                          |         |      |    |     |     |     |        |  |  |  |  |
| 840.4249                                                    | 840.388                                                                                      | -0.0369       | -44        | 818        | 825           | FTFSGGPK           |                 |                   |                                         |                    | Mascot                          |         |      |    |     |     |     |        |  |  |  |  |
| 900.4608                                                    | 900.4171                                                                                     | -0.0437       | -49        | 415        | 422           | MTAPDRLR           |                 |                   |                                         |                    | Mascot                          |         |      |    |     |     |     |        |  |  |  |  |
| 931.4189                                                    | 931.4565                                                                                     | 0.0376        | 40         | 510        | 516           | MEELHKK            |                 |                   | Oxidation (M)[1]                        |                    | Mascot                          |         |      |    |     |     |     |        |  |  |  |  |
| 996.5472                                                    | 996.5475                                                                                     | 0.0003        | 0          | 695        | 702           | QKVHDELK           |                 |                   |                                         |                    | Mascot                          |         |      |    |     |     |     |        |  |  |  |  |
| 1071.4854                                                   | 1071.4399                                                                                    | -0.0455       | -42        | 261        | 268           | YRDFEER            |                 |                   |                                         |                    | Mascot                          |         |      |    |     |     |     |        |  |  |  |  |
| 1083.5078                                                   | 1083.4543                                                                                    | -0.0535       | -49        | 364        | 371           | DRYEAHRR           |                 |                   |                                         |                    | Mascot                          |         |      |    |     |     |     |        |  |  |  |  |
| 1087.52                                                     | 1087.5461                                                                                    | 0.0261        | 24         | 510        | 517           | MEELHKK            |                 |                   | Oxidation (M)[1]                        |                    | Mascot                          |         |      |    |     |     |     |        |  |  |  |  |
| 1113.6262                                                   | 1113.5708                                                                                    | -0.0554       | -50        | 12         | 21            | VVLAQEAR           |                 |                   |                                         |                    | Mascot                          |         |      |    |     |     |     |        |  |  |  |  |
| 1143.6005                                                   | 1143.5475                                                                                    | -0.053        | -46        | 399        | 409           | AIDLDEAGAR         |                 |                   |                                         |                    | Mascot                          |         |      |    |     |     |     |        |  |  |  |  |
| 1215.6382                                                   | 1215.5828                                                                                    | -0.0554       | -46        | 704        | 712           | HRPEFLNR           | 20              | 0                 |                                         |                    | Mascot                          |         |      |    |     |     |     |        |  |  |  |  |
| 1215.6382                                                   | 1215.5828                                                                                    | -0.0554       | -46        | 704        | 712           | HRPEFLNR           |                 |                   |                                         |                    | Mascot                          |         |      |    |     |     |     |        |  |  |  |  |
| 1280.7273                                                   | 1280.6663                                                                                    | -0.061        | -48        | 11         | 21            | VVLAQEAR           |                 |                   |                                         |                    | Mascot                          |         |      |    |     |     |     |        |  |  |  |  |
| 1293.7161                                                   | 1293.6525                                                                                    | -0.0636       | -49        | 210        | 222           | NNPVLGEPGVGK       |                 |                   |                                         |                    | Mascot                          |         |      |    |     |     |     |        |  |  |  |  |
| 1359.7413                                                   | 1359.6835                                                                                    | -0.0578       | -43        | 196        | 206           | EIERVMQVLSR        |                 |                   |                                         |                    | Mascot                          |         |      |    |     |     |     |        |  |  |  |  |
| 1359.7478                                                   | 1359.6835                                                                                    | -0.0643       | -47        | 48         | 60            | SLESIGLSEGVR       | 67              | 98.246            |                                         |                    | Mascot                          |         |      |    |     |     |     |        |  |  |  |  |
| 1461.806                                                    | 1461.7352                                                                                    | -0.0708       | -48        | 136        | 148           | QQVIQLSGYQDK       |                 |                   |                                         |                    | Mascot                          |         |      |    |     |     |     |        |  |  |  |  |
| 1550.8464                                                   | 1550.7694                                                                                    | -0.077        | -50        | 617        | 629           | KPFSVVLDFEIK       |                 |                   |                                         |                    | Mascot                          |         |      |    |     |     |     |        |  |  |  |  |
| 1563.8278                                                   | 1563.7537                                                                                    | -0.0741       | -47        | 544        | 559           | RPSGSFIFAGPSGVGK   | 69              | 98.86             |                                         |                    | Mascot                          |         |      |    |     |     |     |        |  |  |  |  |
| 1563.8278                                                   | 1563.7537                                                                                    | -0.0741       | -47        | 544        | 559           | RPSGSFIFAGPSGVGK   |                 |                   |                                         |                    | Mascot                          |         |      |    |     |     |     |        |  |  |  |  |
| 1592.8643                                                   | 1592.7865                                                                                    | -0.0778       | -49        | 246        | 260           | QLYTLDSLVAQSR      |                 |                   |                                         |                    | Mascot                          |         |      |    |     |     |     |        |  |  |  |  |
| 1666.8282                                                   | 1666.7502                                                                                    | -0.078        | -47        | 315        | 329           | GELOTGATLDEYR      |                 |                   |                                         |                    | Mascot                          |         |      |    |     |     |     |        |  |  |  |  |
| 1691.8633                                                   | 1691.7784                                                                                    | -0.0849       | -50        | 372        | 388           | VSDTSAMVAATLADR    |                 |                   |                                         |                    | Mascot                          |         |      |    |     |     |     |        |  |  |  |  |
| 1706.9475                                                   | 1706.8636                                                                                    | -0.0839       | -49        | 616        | 629           | RKPPSVLDFEIK       |                 |                   |                                         |                    | Mascot                          |         |      |    |     |     |     |        |  |  |  |  |
| 1784.8197                                                   | 1784.7339                                                                                    | -0.0858       | -48        | 676        | 692           | AVGLGFSQGGSENNYER  |                 |                   |                                         |                    | Mascot                          |         |      |    |     |     |     |        |  |  |  |  |
| 1784.8197                                                   | 1784.7339                                                                                    | -0.0858       | -48        | 676        | 692           | AVGLGFSQGGSENNYER  | 71              | 99.28             |                                         |                    | Mascot                          |         |      |    |     |     |     |        |  |  |  |  |
| 1794.9232                                                   | 1794.8361                                                                                    | -0.0871       | -49        | 315        | 330           | GELOTGATLDEYRK     |                 |                   |                                         |                    | Mascot                          |         |      |    |     |     |     |        |  |  |  |  |
| 1809.9592                                                   | 1809.8735                                                                                    | -0.0857       | -47        | 659        | 675           | NTVLIPTSLNLTSDISK  |                 |                   |                                         |                    | Mascot                          |         |      |    |     |     |     |        |  |  |  |  |
| 1820.8773                                                   | 1820.7891                                                                                    | -0.0882       | -48        | 159        | 176           | GGESGNPSTSLVLDQFG  | 83              | 99.961            |                                         |                    | Mascot                          |         |      |    |     |     |     |        |  |  |  |  |
|                                                             |                                                                                              |               |            |            |               | R                  |                 |                   |                                         |                    |                                 |         |      |    |     |     |     |        |  |  |  |  |
|                                                             |                                                                                              |               |            |            |               | R                  |                 |                   |                                         |                    |                                 |         |      |    |     |     |     |        |  |  |  |  |
| 1820.8773                                                   | 1820.7891                                                                                    | -0.0882       | -48        | 159        | 176           | GGESGNPSTSLVLDQFG  |                 |                   |                                         |                    | Mascot                          |         |      |    |     |     |     |        |  |  |  |  |
|                                                             |                                                                                              |               |            |            |               | R                  |                 |                   |                                         |                    |                                 |         |      |    |     |     |     |        |  |  |  |  |
| 1985.0087                                                   | 1984.9116                                                                                    | -0.0971       | -49        | 630        | 646           | AHQEYNSLLOVLEDR    | 124             | 100               |                                         |                    | Mascot                          |         |      |    |     |     |     |        |  |  |  |  |
| 1985.0087                                                   | 1984.9116                                                                                    | -0.0971       | -49        | 630        | 646           | AHQEYNSLLOVLEDR    |                 |                   |                                         |                    | Mascot                          |         |      |    |     |     |     |        |  |  |  |  |
| 2083.989                                                    | 2083.8875                                                                                    | -0.1015       | -49        | 826        | 848           | RAETAEPLDLAGAGAGA  |                 |                   |                                         |                    | Mascot                          |         |      |    |     |     |     |        |  |  |  |  |
|                                                             |                                                                                              |               |            |            |               | PTAGTE             |                 |                   |                                         |                    |                                 |         |      |    |     |     |     |        |  |  |  |  |
| 2112.0283                                                   | 2111.929                                                                                     | -0.0993       | -47        | 594        | 613           | LFGAPPYGYGEEGGQL   |                 |                   |                                         |                    | Mascot                          |         |      |    |     |     |     |        |  |  |  |  |
|                                                             |                                                                                              |               |            |            |               | TEK                |                 |                   |                                         |                    |                                 |         |      |    |     |     |     |        |  |  |  |  |
| 2161.1863                                                   | 2161.0808                                                                                    | -0.1055       | -49        | 223        | 243           | TAVVEGLAQAVHGEVPE  |                 |                   |                                         |                    | Mascot                          |         |      |    |     |     |     |        |  |  |  |  |
|                                                             |                                                                                              |               |            |            |               | TLK                |                 |                   |                                         |                    |                                 |         |      |    |     |     |     |        |  |  |  |  |
| 2164.1648                                                   | 2164.0605                                                                                    | -0.1043       | -48        | 342        | 360           | FQPVQVGEPTVEHTIELK |                 |                   |                                         |                    | Mascot                          |         |      |    |     |     |     |        |  |  |  |  |
| 2283.8642                                                   | 2284.0649                                                                                    | 0.2107        | 92         | 676        | 694           | AVGLGFSQGGSENNYER  |                 |                   | Phospho (ST)[7,11]; Phospho (Y)[15]     |                    | Mascot                          |         |      |    |     |     |     |        |  |  |  |  |
|                                                             |                                                                                              |               |            |            |               | MK                 |                 |                   |                                         |                    |                                 |         |      |    |     |     |     |        |  |  |  |  |
| 2320.2659                                                   | 2320.1504                                                                                    | -0.1155       | -50        | 341        | 360           | RFOPVQVGEPTVEHTIEI |                 |                   |                                         |                    | Mascot                          |         |      |    |     |     |     |        |  |  |  |  |
|                                                             |                                                                                              |               |            |            |               | LK                 |                 |                   |                                         |                    |                                 |         |      |    |     |     |     |        |  |  |  |  |
| 2360.3083                                                   | 2360.1919                                                                                    | -0.1164       | -49        | 94         | 114           | EALQLGHNYGTEHLLGL  |                 |                   |                                         |                    | Mascot                          |         |      |    |     |     |     |        |  |  |  |  |
|                                                             |                                                                                              |               |            |            |               | IR                 |                 |                   |                                         |                    |                                 |         |      |    |     |     |     |        |  |  |  |  |
| 2404.3081                                                   | 2404.189                                                                                     | -0.1191       | -50        | 223        | 245           | TAVVEGLAQAVHGEVPE  |                 |                   |                                         |                    | Mascot                          |         |      |    |     |     |     |        |  |  |  |  |
|                                                             |                                                                                              |               |            |            |               | TLKDK              |                 |                   |                                         |                    |                                 |         |      |    |     |     |     |        |  |  |  |  |
| 2476.2578                                                   | 2476.1362                                                                                    | -0.1216       | -49        | 81         | 83            | SOVEEIQGGQAPSGHI   |                 |                   |                                         |                    | Mascot                          |         |      |    |     |     |     |        |  |  |  |  |
|                                                             |                                                                                              |               |            |            |               | PFTPR              |                 |                   |                                         |                    |                                 |         |      |    |     |     |     |        |  |  |  |  |
| 2476.2578                                                   | 2476.1362                                                                                    | -0.1216       | -49        | 81         | 83            | SOVEEIQGGQAPSGHI   | 140             | 100               |                                         |                    | Mascot                          |         |      |    |     |     |     |        |  |  |  |  |
|                                                             |                                                                                              |               |            |            |               | PFTPR              |                 |                   |                                         |                    |                                 |         |      |    |     |     |     |        |  |  |  |  |
| 2723.2769                                                   | 2723.1482                                                                                    | -0.1287       | -47        | 565        | 588           | ALANFLGDDDLAQIDM   |                 |                   |                                         |                    | Mascot                          |         |      |    |     |     |     |        |  |  |  |  |
|                                                             |                                                                                              |               |            |            |               | GEFHDR             |                 |                   |                                         |                    |                                 |         |      |    |     |     |     |        |  |  |  |  |
| 2739.272                                                    | 2739.1421                                                                                    | -0.1299       | -47        | 565        | 588           | ALANFLGDDDLAQIDM   |                 |                   | Oxidation (M)[18]                       |                    | Mascot                          |         |      |    |     |     |     |        |  |  |  |  |
|                                                             |                                                                                              |               |            |            |               | GEFHDR             |                 |                   |                                         |                    |                                 |         |      |    |     |     |     |        |  |  |  |  |
| 2829.4714                                                   | 2829.3354                                                                                    | -0.136        | -48        | 22         | 47            | MLNHNHYGTEHILLGLIE |                 |                   |                                         |                    | Mascot                          |         |      |    |     |     |     |        |  |  |  |  |
|                                                             |                                                                                              |               |            |            |               | GEGVAAK            |                 |                   |                                         |                    |                                 |         |      |    |     |     |     |        |  |  |  |  |
| 3087.4792                                                   | 3087.343                                                                                     | -0.1362       | -44        | 789        | 817           | ILFEEIGPGLVTDVVEG  |                 |                   |                                         |                    | Mascot                          |         |      |    |     |     |     |        |  |  |  |  |
|                                                             |                                                                                              |               |            |            |               | WDGEGGGEDAK        |                 |                   |                                         |                    |                                 |         |      |    |     |     |     |        |  |  |  |  |
| 2                                                           | ATP-dependent Ctp protease, ATP-binding subunit<br>CtpC [Mycobacterium tuberculosis CDC1551] |               |            |            |               |                    |                 |                   |                                         |                    | gil15843209                     | 93467.2 | 5.64 | 34 | 490 | 100 | 396 | 100    |  |  |  |  |
| Peptide Information                                         |                                                                                              |               |            |            |               |                    |                 |                   |                                         |                    |                                 |         |      |    |     |     |     |        |  |  |  |  |
| Calc. Mass                                                  | Obsrv. Mass                                                                                  | ± da          | ± ppm      | Start      | End           | Sequence           | Ion             | C. I. %           | Modification                            | Rank               | Result Type                     |         |      |    |     |     |     |        |  |  |  |  |
| Seq.                                                        | Seq.                                                                                         |               |            |            |               |                    | Score           |                   |                                         |                    |                                 |         |      |    |     |     |     |        |  |  |  |  |
| 812.3798                                                    | 812.3414                                                                                     | -0.0384       | -47        | 366        | 371           | YEAHRR             |                 |                   |                                         |                    | Mascot                          |         |      |    |     |     |     |        |  |  |  |  |
| 829.5141                                                    | 829.4765                                                                                     | -0.0376       | -45        | 87         | 93            | VLELSLR            |                 |                   |                                         |                    | Mascot                          |         |      |    |     |     |     |        |  |  |  |  |
| 832.4709                                                    | 832.4371                                                                                     | -0.0339       | -41        | 200        | 206           | VMQVLSR            |                 |                   |                                         |                    | Mascot                          |         |      |    |     |     |     |        |  |  |  |  |
| 900.4608                                                    | 900.4171                                                                                     | -0.0437       | -49        | 415        | 422           | MTAPDRLR           |                 |                   |                                         |                    | Mascot                          |         |      |    |     |     |     |        |  |  |  |  |
| 931.4189                                                    | 931.4565                                                                                     | 0.0376        | 40         | 510        | 516           | MEELHKK            |                 |                   | Oxidation (M)[1]                        |                    | Mascot                          |         |      |    |     |     |     |        |  |  |  |  |
| 996.4852                                                    | 996.5475                                                                                     | 0.0623        | 63         | 730        | 737           | MVDLMISR           |                 |                   | Oxidation (M)[1,5]                      |                    | Mascot                          |         |      |    |     |     |     |        |  |  |  |  |
| 1071.4854                                                   | 1071.4399                                                                                    | -0.0455       | -42        | 261        | 268           | YRDFEER            |                 |                   |                                         |                    | Mascot                          |         |      |    |     |     |     |        |  |  |  |  |
| 1083.5078                                                   | 1083.4543                                                                                    | -0.0535       | -49        | 364        | 371           | DRYEAHRR           |                 |                   |                                         |                    | Mascot                          |         |      |    |     |     |     |        |  |  |  |  |
| 1087.52                                                     | 1087.5461                                                                                    | 0.0261        | 24         | 510        | 517           | MEELHKK            |                 |                   | Oxidation (M)[1]                        |                    | Mascot                          |         |      |    |     |     |     |        |  |  |  |  |
| 1113.6262                                                   | 1113.5708                                                                                    | -0.0554       | -50        | 12         | 21            | VVLAQEAR           |                 |                   |                                         |                    | Mascot                          |         |      |    |     |     |     |        |  |  |  |  |
| 1143.6005                                                   | 1143.5475                                                                                    | -0.053        | -46        | 399        | 409           | AIDLDEAGAR         |                 |                   |                                         |                    | Mascot                          |         |      |    |     |     |     |        |  |  |  |  |
| 1215.6382                                                   | 1215.5828                                                                                    | -0.0554       | -46        | 704        | 712           | HRPEFLNR           | 20              | 0                 |                                         |                    | Mascot                          |         |      |    |     |     |     |        |  |  |  |  |
| 1215.6382                                                   | 1215.5828                                                                                    | -0.0554       | -46        | 704        | 712           | HRPEFLNR           |                 |                   |                                         |                    | Mascot                          |         |      |    |     |     |     |        |  |  |  |  |
| 1293.7161                                                   | 1293.6525                                                                                    | -0.0636       | -49        | 210        | 222           | NNPVLGEPGVGK       |                 |                   |                                         |                    | Mascot                          |         |      |    |     |     |     |        |  |  |  |  |
| 1359.7413                                                   | 1359.6835                                                                                    | -0.0578       | -43        | 196        | 206           | EIERVMQVLSR        |                 |                   |                                         |                    | Mascot                          |         |      |    |     |     |     |        |  |  |  |  |
| 1359.7478                                                   | 1359.6835                                                                                    | -0.0643       | -47        | 48         | 60            | SLESIGLSEGVR       | 67              | 98.246            |                                         |                    | Mascot                          |         |      |    |     |     |     |        |  |  |  |  |
| 1461.806                                                    | 1461.7352                                                                                    | -0.0708       | -48        | 136        | 148           | QQVIQLSGYQDK       |                 |                   |                                         |                    | Mascot                          |         |      |    |     |     |     |        |  |  |  |  |
| 1550.8464                                                   | 1550.7694                                                                                    | -0.077        | -50        | 617        | 629           | KPFSVVLDFEIK       |                 |                   |                                         |                    | Mascot                          |         |      |    |     |     |     |        |  |  |  |  |
| 1563.8278                                                   | 1563.7537                                                                                    | -0.0741       | -47        | 544        | 559           | RPSGSFIFAGPSGVGK   | 69              | 98.86             |                                         |                    | Mascot                          |         |      |    |     |     |     |        |  |  |  |  |
| 1563.8278                                                   | 1563.7537                                                                                    | -0.0741       | -47        | 544        | 559           | RPSGSFIFAGPSGVGK   |                 |                   |                                         |                    | Mascot                          |         |      |    |     |     |     |        |  |  |  |  |
| 1592.8499                                                   | 1592.7865                                                                                    | -0.0634       | -40</      |            |               |                    |                 |                   |                                         |                    |                                 |         |      |    |     |     |     |        |  |  |  |  |





|              |                                                      |             |         |       |               |            |                           |            |                |                                           |                |             |                    |                                     |         |     |        |
|--------------|------------------------------------------------------|-------------|---------|-------|---------------|------------|---------------------------|------------|----------------|-------------------------------------------|----------------|-------------|--------------------|-------------------------------------|---------|-----|--------|
|              | 2282.9053                                            | 2282.9839   | 0.0786  | 34    | 726           | 743        | TSEVMRPSKTFNITLESV        |            |                |                                           |                |             |                    | Oxidation (M)[5], Phospho (ST)[2,8] |         |     | Mascot |
|              | 2284.1213                                            | 2283.981    | -0.1403 | -61   | 511           | 529        | DHDTGLKIQIIPQVVA          |            |                |                                           |                |             |                    | Phospho (ST)[1]                     |         |     | Mascot |
|              | 2344.1423                                            | 2343.9404   | -0.2019 | -86   | 339           | 360        | MR<br>GISNFHSPSDVVDASMP   |            |                |                                           |                |             |                    |                                     |         |     | Mascot |
|              |                                                      | 2343.9404   |         |       |               |            |                           |            |                |                                           |                |             |                    |                                     |         |     | Mascot |
|              | 2360.1372                                            | 2359.9363   | -0.2009 | -85   | 339           | 360        | AMIR<br>GISNFHSPSDVVDASMP |            |                |                                           |                |             |                    | Oxidation (M)[17]                   |         |     | Mascot |
|              | 2510.2861                                            | 2510.0698   | -0.2163 | -86   | 482           | 502        | LSGMPVFWLDRPHE            |            |                |                                           |                |             |                    |                                     |         |     | Mascot |
|              | 2872.1589                                            | 2872.1433   | -0.0156 | -5    | 712           | 734        | TVDIGYYYPDEKTSV           |            |                |                                           |                |             |                    | Phospho (Y)[7,8,9]                  |         |     | Mascot |
|              | 2973.4265                                            | 2973.1682   | -0.2583 | -87   | 661           | 686        | GSQFYLSLFWAQLAEQ          |            |                |                                           |                |             |                    |                                     |         |     | Mascot |
|              | 3090.5742                                            | 3090.3069   | -0.2673 | -86   | 287           | 314        | LFDELGVNNGLSLDLY          |            |                |                                           |                |             |                    |                                     |         |     | Mascot |
|              | 3091.6714                                            | 3091.3442   | -0.3272 | -106  | 2             | 29         | SAQOPTIYTLTDEAPLLA        |            |                |                                           |                |             |                    |                                     |         |     | Mascot |
|              | 3687.791                                             | 3687.4727   | -0.3183 | -86   | 428           | 460        | TFEIPEDGVANVDIDTGE        |            |                |                                           |                |             |                    |                                     |         |     | Mascot |
|              |                                                      |             |         |       |               |            | VLLTQNVVEGDIWR            |            |                |                                           |                |             |                    |                                     |         |     |        |
| 2            | isocitrate dehydrogenase [Mycobacterium vanbaalenii] |             |         |       | gi 120404190  | 82312.6    | 5.26                      | 17         | 82             | 94.567                                    | 73             | 99.644      |                    |                                     |         |     |        |
|              | PYR-1                                                |             |         |       |               |            |                           |            |                |                                           |                |             |                    |                                     |         |     |        |
|              | Peptide Information                                  |             |         |       |               |            |                           |            |                |                                           |                |             |                    |                                     |         |     |        |
|              | Calc. Mass                                           | Obsrv. Mass | ± da    | ± ppm | Start         | End        | Sequence                  | Ion        | C. I. %        | Modification                              | Rank           | Result Type |                    |                                     |         |     |        |
|              |                                                      |             |         |       | Seq.          | Seq.       |                           | Score      |                |                                           |                |             |                    |                                     |         |     |        |
|              | 1045.4384                                            | 1045.4758   | 0.0374  | 36    | 189           | 196        | SMTLDKDR                  |            |                | Phospho (ST)[1]                           |                | Mascot      |                    |                                     |         |     |        |
|              | 1099.6293                                            | 1099.4961   | -0.1332 | -121  | 462           | 471        | MPVVKDAAIR                |            |                |                                           |                | Mascot      |                    |                                     |         |     |        |
|              | 1107.5428                                            | 1107.4495   | -0.0933 | -84   | 378           | 387        | AVNPSTFSR                 |            |                |                                           |                | Mascot      |                    |                                     |         |     |        |
|              | 1107.5428                                            | 1107.4495   | -0.0933 | -84   | 378           | 387        | AVNPSTFSR                 |            |                |                                           |                | Mascot      |                    |                                     |         |     |        |
|              | 1118.6027                                            | 1118.4713   | -0.1314 | -117  | 249           | 258        | TGVNFSLVHK                |            |                |                                           |                | Mascot      |                    |                                     |         |     |        |
|              | 1277.5388                                            | 1277.6024   | 0.0636  | 50    | 222           | 232        | GDVIMVMSK                 |            |                | Oxidation (M)[7,9]                        |                | Mascot      |                    |                                     |         |     |        |
|              | 1290.5857                                            | 1290.621    | 0.0353  | 27    | 388           | 397        | MYQEVNFK                  |            |                | Oxidation (M)[1]                          |                | Mascot      |                    |                                     |         |     |        |
|              | 1510.7874                                            | 1510.6597   | -0.1277 | -85   | 593           | 604        | HVHQLVEENHLR              |            |                |                                           |                | Mascot      |                    |                                     |         |     |        |
|              | 1510.7874                                            | 1510.6597   | -0.1277 | -85   | 593           | 604        | HVHQLVEENHLR              | 73         | 99.644         |                                           |                | Mascot      |                    |                                     |         |     |        |
|              | 1634.984                                             | 1634.9411   | -0.0429 | -87   | 85            | 100        | LPNISASVPLLAAIK           |            |                |                                           |                | Mascot      |                    |                                     |         |     |        |
|              | 1637.7601                                            | 1637.6205   | -0.1396 | -85   | 159           | 172        | KPHPSMGEVSDASR            |            |                |                                           |                | Mascot      |                    |                                     |         |     |        |
|              | 1653.755                                             | 1653.6143   | -0.1407 | -85   | 159           | 172        | KPHPSMGEVSDASR            |            |                | Oxidation (M)[6]                          |                | Mascot      |                    |                                     |         |     |        |
|              | 1657.6437                                            | 1657.6716   | 0.0279  | 17    | 406           | 419        | TMGTVPNVGLMAMK            |            |                | Oxidation (M)[2,11,13], Phospho (ST)[1,4] |                | Mascot      |                    |                                     |         |     |        |
|              | 1657.6437                                            | 1657.6716   | 0.0279  | 17    | 406           | 419        | TMGTVPNVGLMAMK            |            |                | Oxidation (M)[2,11,13], Phospho (ST)[1,4] |                | Mascot      |                    |                                     |         |     |        |
|              | 1779.8265                                            | 1779.6713   | -0.1552 | -87   | 326           | 339        | CHEHRPELAMVDSAK           |            |                | Carbamidomethyl (C)[1]                    |                | Mascot      |                    |                                     |         |     |        |
|              | 1892.714                                             | 1892.7313   | 0.0173  | 22    | 325           | 339        | CHEHRPELAMVDSAK           |            |                | Phospho (ST)[13]                          |                | Mascot      |                    |                                     |         |     |        |
|              | 1896.0001                                            | 1895.8351   | -0.165  | -87   | 552           | 568        | DVLTDLFPILELGSATK         |            |                |                                           |                | Mascot      |                    |                                     |         |     |        |
|              | 2165.1382                                            | 2164.9546   | -0.1836 | -85   | 85            | 103        | LPNISASVPLLAAIKELK        |            |                |                                           |                | Mascot      |                    |                                     |         |     |        |
|              | 2344.1423                                            | 2343.9404   | -0.2019 | -86   | 340           | 361        | GISNFHSPSDVVDASMP         |            |                | Phospho (ST)[5,7]                         |                | Mascot      |                    |                                     |         |     |        |
|              |                                                      |             |         |       |               |            | AMIR                      |            |                |                                           |                |             |                    |                                     |         |     |        |
|              | 2360.1372                                            | 2359.9363   | -0.2009 | -85   | 340           | 361        | GISNFHSPSDVVDASMP         |            |                | Oxidation (M)[17]                         |                | Mascot      |                    |                                     |         |     |        |
|              |                                                      |             |         |       |               |            | AMIR                      |            |                |                                           |                |             |                    |                                     |         |     |        |
|              | 2510.1179                                            | 2510.0698   | -0.0481 | -19   | 662           | 682        | GSQFYLYMYWAQALAEQ         |            |                | Oxidation (M)[9]                          |                | Mascot      |                    |                                     |         |     |        |
|              |                                                      |             |         |       |               |            | TDDK                      |            |                |                                           |                |             |                    |                                     |         |     |        |
|              | 3090.6106                                            | 3090.3069   | -0.3037 | -86   | 288           | 315        | LFDELGVNNGLSLDLYS         |            |                |                                           |                | Mascot      |                    |                                     |         | Mis |        |
|              |                                                      |             |         |       |               |            | KIEVLPASQR                |            |                |                                           |                |             |                    |                                     |         |     |        |
|              | 3686.8071                                            | 3687.4727   | 0.6656  | 181   | 429           | 461        | TFEIPEDGVANVDIDTGE        |            |                |                                           |                | Mascot      |                    |                                     |         |     |        |
|              |                                                      |             |         |       |               |            | VLLTQNVVEGDIWR            |            |                |                                           |                |             |                    |                                     |         |     |        |
| 3            | isocitrate dehydrogenase, NADP-dependent             |             |         |       | gi 118463374  | 83086.2    | 5.82                      | 11         | 73             | 58.784                                    | 73             | 99.644      |                    |                                     |         |     |        |
|              | [Mycobacterium avium 104]                            |             |         |       |               |            |                           |            |                |                                           |                |             |                    |                                     |         |     |        |
|              | Peptide Information                                  |             |         |       |               |            |                           |            |                |                                           |                |             |                    |                                     |         |     |        |
|              | Calc. Mass                                           | Obsrv. Mass | ± da    | ± ppm | Start         | End        | Sequence                  | Ion        | C. I. %        | Modification                              | Rank           | Result Type |                    |                                     |         |     |        |
|              |                                                      |             |         |       | Seq.          | Seq.       |                           | Score      |                |                                           |                |             |                    |                                     |         |     |        |
|              | 1045.4498                                            | 1045.4758   | 0.0262  | 25    | 188           | 196        | SMTLDRAR                  |            |                | Oxidation (M)[2], Phospho (ST)[1]         |                | Mascot      |                    |                                     |         |     |        |
|              | 1107.5428                                            | 1107.4495   | -0.0933 | -84   | 377           | 386        | AVNPSTFSR                 |            |                |                                           |                | Mascot      |                    |                                     |         |     |        |
|              | 1107.5714                                            | 1107.4495   | -0.1219 | -110  | 197           | 205        | NVKMELETK                 |            |                | Oxidation (M)[4]                          |                | Mascot      |                    |                                     |         |     |        |
|              | 1109.421                                             | 1109.4098   | -0.0112 | -10   | 189           | 196        | SMTLDRAR                  |            |                | Phospho (ST)[1], Phospho (ST)[3]          |                | Mascot      |                    |                                     |         |     |        |
|              | 1118.4799                                            | 1118.4713   | -0.0086 | -8    | 208           | 208        | MELETKSGK                 |            |                | Oxidation (M)[1], Phospho (ST)[5]         |                | Mascot      |                    |                                     |         |     |        |
|              | 1290.7317                                            | 1290.621    | -0.1107 | -86   | 263           | 274        | VSHPIVFGHAVK              |            |                |                                           |                | Mascot      |                    |                                     |         |     |        |
|              | 1510.7874                                            | 1510.6597   | -0.1277 | -85   | 592           | 603        | HVHQLVEENHLR              |            |                |                                           |                | Mascot      |                    |                                     |         |     |        |
|              | 1510.7874                                            | 1510.6597   | -0.1277 | -85   | 592           | 603        | HVHQLVEENHLR              | 73         | 99.644         |                                           |                | Mascot      |                    |                                     |         |     |        |
|              | 1616.5962                                            | 1616.6095   | 0.0133  | 64    | 220           | 231        | TGDIIDSMFMK               |            |                | Oxidation (M)[8,10], Phospho (ST)[7,11]   |                | Mascot      |                    |                                     |         |     |        |
|              |                                                      |             |         |       |               |            |                           |            |                | Phospho (ST)[1]                           |                | Mascot      |                    |                                     |         |     |        |
|              | 1707.7689                                            | 1707.6257   | -0.1432 | -84   | 128           | 141        | YAKCLGSVAVNPLR            |            |                | Carbamidomethyl (C)[4], Phospho (ST)[7]   |                | Mascot      |                    |                                     |         |     |        |
|              |                                                      |             |         |       |               |            |                           |            |                | Phospho (Y)[1]                            |                | Mascot      |                    |                                     |         |     |        |
|              | 1896.0001                                            | 1895.8351   | -0.165  | -87   | 551           | 567        | DVLTDLFPILELGSATK         |            |                |                                           |                | Mascot      |                    |                                     |         |     |        |
|              | 2238.9783                                            | 2238.9409   | -0.0374 | -17   | 320           | 338        | DLHACHEHRPELAMVDS         |            |                | Phospho (ST)[17]                          |                | Mascot      |                    |                                     |         |     |        |
|              |                                                      |             |         |       |               |            | AK                        |            |                |                                           |                |             |                    |                                     |         |     |        |
|              | 3091.4902                                            | 3091.3442   | -0.146  | -47   | 232           | 257        | KALVEFYEQMQDAYET          |            |                |                                           |                | Mascot      |                    |                                     |         |     |        |
|              |                                                      |             |         |       |               |            | GVMFSLHVK                 |            |                |                                           |                |             |                    |                                     |         |     |        |
| 4            | isocitrate dehydrogenase, NADP-dependent             |             |         |       | gi 118465799  | 83549.2    | 5.7                       | 10         | 73             | 58.784                                    | 73             | 99.644      |                    |                                     |         |     |        |
|              | [Mycobacterium avium 104]                            |             |         |       |               |            |                           |            |                |                                           |                |             |                    |                                     |         |     |        |
|              | Peptide Information                                  |             |         |       |               |            |                           |            |                |                                           |                |             |                    |                                     |         |     |        |
|              | Calc. Mass                                           | Obsrv. Mass | ± da    | ± ppm | Start         | End        | Sequence                  | Ion        | C. I. %        | Modification                              | Rank           | Result Type |                    |                                     |         |     |        |
|              |                                                      |             |         |       | Seq.          | Seq.       |                           | Score      |                |                                           |                |             |                    |                                     |         |     |        |
|              | 842.3655                                             | 842.4393    | 0.0738  | 88    | 635           | 642        | SLDAATGK                  |            |                | Phospho (ST)[1]                           |                | Mascot      |                    |                                     |         |     |        |
|              | 1045.4498                                            | 1045.4758   | 0.0262  | 25    | 188           | 196        | SMTLDRAR                  |            |                | Oxidation (M)[2], Phospho (ST)[1]         |                | Mascot      |                    |                                     |         |     |        |
|              | 1109.421                                             | 1109.4098   | -0.0112 | -10   | 189           | 196        | SMTLDRAR                  |            |                | Phospho (ST)[1], Phospho (ST)[3]          |                | Mascot      |                    |                                     |         |     |        |
|              | 1290.7317                                            | 1290.621    | -0.1107 | -86   | 263           | 274        | VSHPIVFGHAVK              |            |                |                                           |                | Mascot      |                    |                                     |         |     |        |
|              | 1320.431                                             | 1320.4691   | 0.0381  | 29    | 377           | 386        | AVSPSTFSR                 |            |                | Phospho (ST)[3,6], Phospho (ST)[7]        |                | Mascot      |                    |                                     |         |     |        |
|              | 1329.7122                                            | 1329.6324   | -0.0798 | -60   | 538           | 550        | GQDTAATGNLR               |            |                |                                           |                | Mascot      |                    |                                     |         |     |        |
|              | 1510.7874                                            | 1510.6597   | -0.1277 | -85   | 592           | 603        | HVHQLVEENHLR              |            |                |                                           |                | Mascot      |                    |                                     |         |     |        |
|              | 1510.7874                                            | 1510.6597   | -0.1277 | -85   | 592           | 603        | HVHQLVEENHLR              | 73         | 99.644         |                                           |                | Mascot      |                    |                                     |         |     |        |
|              | 1895.8279                                            | 1895.8351   | 0.0072  | 4     | 216           | 231        | VSLRGGVDSMFMK             |            |                | Oxidation (M)[13], Phospho (ST)[2]        |                | Mascot      |                    |                                     |         |     |        |
|              | 2238.9783                                            | 2238.9409   | -0.0374 | -17   | 320           | 338        | DLHACHEHRPELAMVDS         |            |                | Phospho (ST)[17]                          |                | Mascot      |                    |                                     |         |     |        |
|              |                                                      |             |         |       |               |            | AK                        |            |                |                                           |                |             |                    |                                     |         |     |        |
|              | 2283.1079                                            | 2282.9839   | -0.124  | -54   | 726           | 744        | LTAVMRPSKTLNDALVTH        |            |                | Phospho (ST)[8], Phospho (ST)[2]          |                | Mascot      |                    |                                     |         |     |        |
|              |                                                      |             |         |       |               |            | R                         |            |                |                                           |                |             |                    |                                     |         |     |        |
|              | 2297.0374                                            | 2296.9937   | -0.0437 | -19   | 160           | 179        | HPSMGEVSMASRTHV           |            |                | Oxidation (M)[5]                          |                | Mascot      |                    |                                     |         |     |        |
|              |                                                      |             |         |       |               |            | ATMK                      |            |                |                                           |                |             |                    |                                     |         |     |        |
| Gel Idx/Pos  | 175/H2                                               |             |         |       |               |            | Instr/Gel Origin          |            | BA2060/121115A |                                           | Process Status |             | Analysis Succeeded |                                     |         |     |        |
| Plate #/Name | [1] 31598                                            |             |         |       |               |            | Instrument Sample Name    |            |                |                                           | Spectra        |             | 8                  |                                     |         |     |        |
| Rank         | Protein Name                                         |             |         |       | Accession No. | Protein MW | Protein PI                | Pep. Count | Protein Score  | Protein Score                             | Protein Score  | Total Ion   | Total Ion          | C. I. %                             | C. I. % |     |        |
| 1            | ribonucleotide-diphosphate reductase subunit alpha   |             |         |       | gi 118468034  | 80495.6    | 5.72                      | 26         | 344            | 100                                       | 276            | 100         |                    |                                     |         |     |        |
|              | [Mycobacterium smegmatis str. MC2 155]               |             |         |       |               |            |                           |            |                |                                           |                |             |                    |                                     |         |     |        |
|              | Peptide Information                                  |             |         |       |               |            |                           |            |                |                                           |                |             |                    |                                     |         |     |        |
|              | Calc. Mass                                           | Obsrv. Mass | ± da    | ± ppm | Start         | End        | Sequence                  | Ion        | C. I. %        | Modification                              | Rank           | Result Type |                    |                                     |         |     |        |
|              |                                                      |             |         |       | Seq.          | Seq.       |                           | Score      |                |                                           |                |             |                    |                                     |         |     |        |
|              | 828.4614                                             | 828.3936    | -0.0679 | -82   | 682           | 687        | TLYYIR                    |            |                |                                           |                | Mascot      |                    |                                     |         |     |        |
|              | 907.4784                                             | 907.4011    | -0.0773 | -85   | 671           | 677        | AGIYAWR                   | 26         | 0              |                                           |                | Mascot      |                    |                                     |         |     |        |
|              | 907.4784                                             | 907.4011    | -0.0773 | -85   | 671           | 677        | AGIYAWR                   |            |                |                                           |                | Mascot      |                    |                                     |         |     |        |
|              | 1009.4948                                            | 1009.4092   | -0.0856 | -85   | 67            | 74         | EVLDDYSR                  |            |                |                                           |                | Mascot      |                    |                                     |         |     |        |
|              | 1027.5612                                            | 1027.4718   | -0.0896 | -87   | 91            | 98         | FPFTLGFAR                 |            |                |                                           |                | Mascot      |                    |                                     |         |     |        |
|              | 1029.5575                                            | 1029.4779   | -0.0796 | -77   | 140           | 148        | LVDEIDGR                  |            |                |                                           |                | Mascot      |                    |                                     |         |     |        |
|              | 1036.5786                                            | 1036.4456   | -0.133  | -128  | 79            | 87         | SLLDRAVAK                 |            |                |                                           |                | Mascot      |                    |                                     |         |     |        |
|              | 1107.5275                                            | 1107.4509   | -0.0766 | -69   | 91            | 99         | FPFTLGFAR                 |            |                | Phospho (ST)[3]                           |                | Mascot      |                    |                                     |         |     |        |
|              |                                                      |             |         |       |               |            |                           |            |                |                                           |                |             |                    |                                     |         |     |        |



|   |                                                    |             |          |       |              |          |                     |    |       |         |              |      |                                                                 |     |  |  |        |        |        |
|---|----------------------------------------------------|-------------|----------|-------|--------------|----------|---------------------|----|-------|---------|--------------|------|-----------------------------------------------------------------|-----|--|--|--------|--------|--------|
|   | 1169.7001                                          | 1169.6041   | -0.096   | -82   | 196          | 207      | GGVALLSNIR          |    |       | 4       | 0            |      |                                                                 |     |  |  | Mascot |        |        |
|   | 1169.7001                                          | 1169.6041   | -0.096   | -82   | 196          | 207      | GGVALLSNIR          |    |       |         |              |      |                                                                 |     |  |  | Mascot |        |        |
|   | 1177.483                                           | 1177.5038   | 0.0206   | 18    | 323          | 331      | YYEMVDDAR           |    |       |         |              |      | Oxidation (M)[4]                                                |     |  |  | Mascot |        |        |
|   | 1179.531                                           | 1179.5062   | -0.0248  | -21   | 175          | 184      | IEDNESIGR           |    |       |         |              |      | Oxidation (M)[5]                                                |     |  |  | Mascot |        |        |
|   |                                                    | 1179.5062   |          |       |              |          |                     |    |       |         |              |      |                                                                 |     |  |  | Mascot |        |        |
|   | 1407.7267                                          | 1407.597    | -0.1297  | -92   | 149          | 161      | FQPATPTFLNSGK       |    |       | 31      | 0            |      |                                                                 |     |  |  | Mascot |        |        |
|   | 1407.7267                                          | 1407.597    | -0.1297  | -92   | 149          | 161      | FQPATPTFLNSGK       |    |       |         |              |      |                                                                 |     |  |  | Mascot |        |        |
|   | 1461.7631                                          | 1461.6401   | -0.123   | -84   | 163          | 174      | QRGEPVSCFLLR        |    |       |         |              |      | Carbamidomethyl (C)[8]                                          |     |  |  | Mascot |        |        |
|   | 1510.6396                                          | 1510.6488   | 0.0092   | 6     | 323          | 333      | YYEMVDDARIR         |    |       |         |              |      | Phospho (Y)[1]                                                  |     |  |  | Mascot |        |        |
|   | 1619.7588                                          | 1619.6208   | -0.1382  | -85   | 55           | 66       | LDYLIENEYER         |    |       |         |              |      |                                                                 |     |  |  | Mascot |        |        |
|   | 1619.7588                                          | 1619.6208   | -0.1382  | -85   | 55           | 66       | LDYLIENEYER         |    |       |         |              | 42   | 0                                                               |     |  |  | Mascot |        |        |
|   | 1683.8336                                          | 1683.6906   | -0.143   | -85   | 229          | 243      | LLEDSFSYANQLGAR     |    |       |         |              | 97   | 99.999                                                          |     |  |  | Mascot |        |        |
|   | 1683.8336                                          | 1683.6906   | -0.143   | -85   | 229          | 243      | LLEDSFSYANQLGAR     |    |       |         |              |      |                                                                 |     |  |  | Mascot |        |        |
|   | 1763.7999                                          | 1763.709    | -0.0909  | -52   | 229          | 243      | LLEDSFSYANQLGAR     |    |       |         |              |      | Phospho (Y)[8]                                                  |     |  |  | Mascot |        |        |
|   | 1763.8633                                          | 1763.709    | -0.1543  | -87   | 417          | 432      | AMDSPDFAQTIEVAIR    |    |       | 63      | 95.618       |      |                                                                 |     |  |  | Mascot |        |        |
|   | 1779.6914                                          | 1779.7051   | 0.0137   | 8     | 55           | 66       | LDYLIENEYER         |    |       |         |              |      | Phospho (Y)[3,9]                                                |     |  |  | Mascot |        |        |
|   | 1815.7632                                          | 1815.8851   | 0.1219   | 67    | 690          | 706      | QMALEGTVEGCVSCMIL   |    |       |         |              |      | Oxidation (M)[2]                                                |     |  |  | Mascot |        |        |
|   | 1884.9127                                          | 1884.7593   | -0.1622  | -86   | 544          | 559      | LFADADHIPTQDDWK     |    |       |         |              |      |                                                                 |     |  |  | Mascot |        |        |
|   | 1904.9514                                          | 1904.7892   | -0.1622  | -85   | 244          | 260      | QGAGAVYLHAHHPDIYR   |    |       | 47      | 0            |      |                                                                 |     |  |  | Mascot |        |        |
|   | 1904.9514                                          | 1904.7892   | -0.1622  | -85   | 244          | 260      | QGAGAVYLHAHHPDIYR   |    |       |         |              |      |                                                                 |     |  |  | Mascot |        |        |
|   | 1906.8688                                          | 1906.762    | -0.1068  | -56   | 294          | 308      | KNEDMYLFSFYDVER     |    |       |         |              |      |                                                                 |     |  |  | Mascot |        |        |
|   | 1921.8636                                          | 1921.6995   | -0.1641  | -85   | 294          | 308      | KNEDMYLFSFYDVER     |    |       |         |              |      | Oxidation (M)[5]                                                |     |  |  | Mascot |        |        |
|   | 2041.0138                                          | 2040.8398   | -0.1742  | -85   | 543          | 559      | RLFADADHIPTQDDWK    |    |       |         |              |      |                                                                 |     |  |  | Mascot |        |        |
|   | 2210.0076                                          | 2209.8189   | -0.1878  | -86   | 520          | 537      | YASGFFDKYTDQWEPK    |    |       |         |              |      |                                                                 |     |  |  | Mascot |        |        |
|   | 2366.9229                                          | 2367.0586   | 0.1357   | 57    | 91           | 107      | FPTFLGAFKYTYSYTLK   |    |       |         |              |      | Phospho (ST)[3], Phospho (Y)[10,11,14]                          |     |  |  | Mascot |        |        |
|   | 2509.1895                                          | 2508.9763   | -0.2132  | -85   | 35           | 54       | QYFLQHVNGNTVFFHSQ   |    |       |         |              |      |                                                                 |     |  |  | Mascot |        |        |
|   |                                                    |             |          |       |              |          | DEK                 |    |       |         |              |      |                                                                 |     |  |  |        | Mascot |        |
|   | 2552.3396                                          | 2552.1208   | -0.2188  | -86   | 638          | 660      | IDITYAAATQHVDQGLSLT |    |       |         |              |      |                                                                 |     |  |  | Mascot |        |        |
|   |                                                    |             |          |       |              |          | LFK                 |    |       |         |              |      |                                                                 |     |  |  |        | Mascot |        |
|   | 3517.5129                                          | 3517.4856   | -0.0273  | -8    | 638          | 666      | IDITYAAATQHVDQGLSLT |    |       |         |              |      | Phospho (ST)[17], Phospho (ST)[4,9]                             |     |  |  | Mascot |        |        |
|   |                                                    |             |          |       |              |          | LFKDTATTR           |    |       |         |              |      | Phospho (Y)[5]                                                  |     |  |  |        | Mascot |        |
| 2 | ribonucleotide-diphosphate reductase subunit alpha |             |          |       | gil54026278  | 124681.1 | 6.01                | 25 | 286   |         |              | 100  | 233                                                             | 100 |  |  |        |        |        |
|   | [Nocardia farcinica IFM 10152]                     |             |          |       |              |          |                     |    |       |         |              |      |                                                                 |     |  |  |        |        |        |
|   | Peptide Information                                |             |          |       |              |          |                     |    |       |         |              |      |                                                                 |     |  |  |        |        |        |
|   | Calc. Mass                                         | Obsrv. Mass | ± da     | ± ppm | Start        | End      | Sequence            |    | Ion   | C. I. % | Modification | Rank | Result Type                                                     |     |  |  |        |        |        |
|   |                                                    |             |          |       | Seq.         | Seq.     |                     |    | Score |         |              |      |                                                                 |     |  |  |        |        |        |
|   | 828.4614                                           | 828.3935    | -0.0679  | -82   | 1076         | 1083     | TLYYIR              |    |       |         |              |      |                                                                 |     |  |  |        | Mascot |        |
|   | 842.5457                                           | 842.4472    | -0.1045  | -124  | 467          | 474      | LQIVSVWR            |    |       |         |              |      |                                                                 |     |  |  |        | Mascot |        |
|   | 870.4829                                           | 870.4682    | -0.0147  | -16   | 59           | 66       | YSRAFLVR            |    |       |         |              |      |                                                                 |     |  |  |        | Mascot |        |
|   | 907.4784                                           | 907.4011    | -0.0773  | -85   | 1067         | 1073     | AQIYAWR             |    | 26    | 0       |              |      |                                                                 |     |  |  |        | Mascot |        |
|   | 907.4784                                           | 907.4011    | -0.0773  | -85   | 1067         | 1073     | AQIYAWR             |    |       |         |              |      |                                                                 |     |  |  |        | Mascot |        |
|   | 1027.5612                                          | 1027.4716   | -0.0896  | -87   | 78           | 86       | FPTFLGAFK           |    |       |         |              |      |                                                                 |     |  |  |        | Mascot |        |
|   | 1029.5575                                          | 1029.4779   | -0.0796  | -77   | 127          | 135      | LVDEIDGR            |    |       |         |              |      |                                                                 |     |  |  |        | Mascot |        |
|   | 1045.4463                                          | 1045.4753   | 0.029    | 28    | 506          | 513      | NLQNYTGR            |    |       |         |              |      | Phospho (Y)[5]                                                  |     |  |  |        | Mascot |        |
|   | 1107.5275                                          | 1107.4509   | -0.0766  | -69   | 78           | 86       | FPTFLGAFK           |    |       |         |              |      | Phospho (ST)[3]                                                 |     |  |  |        | Mascot |        |
|   | 1169.7001                                          | 1169.6041   | -0.096   | -82   | 592          | 603      | GGVALLSNIR          |    | 4     | 0       |              |      |                                                                 |     |  |  |        | Mascot |        |
|   | 1169.7001                                          | 1169.6041   | -0.096   | -82   | 592          | 603      | GGVALLSNIR          |    |       |         |              |      |                                                                 |     |  |  |        | Mascot |        |
|   | 1177.6129                                          | 1177.5038   | -0.1091  | -93   | 1078         | 1085     | TLYYIRLR            |    |       |         |              |      | Phospho (Y)[3]                                                  |     |  |  |        | Mascot |        |
|   | 1179.5082                                          | 1179.5062   | -0.002   | -2    | 66           | 74       | SLFQGYDK            |    |       |         |              |      | Phospho (Y)[7]                                                  |     |  |  |        | Mascot |        |
|   | 1222.3774                                          | 1222.5355   | 0.1581   | 129   | 719          | 726      | YYEMVDDK            |    |       |         |              |      | Phospho (Y)[1,2]                                                |     |  |  |        | Mascot |        |
|   | 1234.5409                                          | 1234.5753   | 0.0344   | 28    | 719          | 727      | YYEMVDDK            |    |       |         |              |      | Oxidation (M)[4]                                                |     |  |  |        | Mascot |        |
|   | 1407.7267                                          | 1407.597    | -0.1297  | -92   | 136          | 148      | FQPATPTFLNSGK       |    | 31    | 0       |              |      |                                                                 |     |  |  |        | Mascot |        |
|   | 1407.7267                                          | 1407.597    | -0.1297  | -92   | 136          | 148      | FQPATPTFLNSGK       |    |       |         |              |      |                                                                 |     |  |  |        | Mascot |        |
|   | 1683.8336                                          | 1683.6906   | -0.143   | -85   | 625          | 639      | LLEDSFSYANQLGAR     |    |       |         |              | 97   | 99.999                                                          |     |  |  |        | Mascot |        |
|   | 1683.8336                                          | 1683.6906   | -0.143   | -85   | 625          | 639      | LLEDSFSYANQLGAR     |    |       |         |              |      |                                                                 |     |  |  |        | Mascot |        |
|   | 1763.7999                                          | 1763.709    | -0.0909  | -52   | 625          | 639      | LLEDSFSYANQLGAR     |    |       |         |              |      | Phospho (Y)[8]                                                  |     |  |  |        | Mascot |        |
|   | 1763.8633                                          | 1763.709    | -0.1543  | -87   | 813          | 828      | AMDSPDFAQTIEVAIR    |    | 63    | 95.618  |              |      |                                                                 |     |  |  |        | Mascot |        |
|   | 1779.6914                                          | 1779.7051   | -0.1531  | -86   | 813          | 828      | AMDSPDFAQTIEVAIR    |    |       |         |              |      | Oxidation (M)[2]                                                |     |  |  |        | Mascot |        |
|   | 1815.7632                                          | 1815.8851   | 0.1219   | 67    | 690          | 706      | QMALEGTVEGCVSCMIL   |    |       |         |              |      | Phospho (ST)[12]                                                |     |  |  |        | Mascot |        |
|   | 1884.8488                                          | 1884.7505   | -0.0983  | -52   | 179          | 194      | AGDRLVSDHSGSYATVEK  |    |       |         |              |      | Phospho (Y)[12]                                                 |     |  |  |        | Mascot |        |
|   | 1904.9514                                          | 1904.7892   | -0.1622  | -85   | 640          | 656      | QGAGAVYLHAHHPDIYR   |    | 47    | 0       |              |      |                                                                 |     |  |  |        | Mascot |        |
|   | 1904.9514                                          | 1904.7892   | -0.1622  | -85   | 640          | 656      | QGAGAVYLHAHHPDIYR   |    |       |         |              |      |                                                                 |     |  |  |        | Mascot |        |
|   | 1906.8688                                          | 1906.762    | -0.1068  | -56   | 690          | 704      | KNEDMYLFSFYDVER     |    |       |         |              |      |                                                                 |     |  |  |        | Mascot |        |
|   | 1921.8636                                          | 1921.6995   | -0.1641  | -85   | 690          | 704      | KNEDMYLFSFYDVER     |    |       |         |              |      | Oxidation (M)[5]                                                |     |  |  |        | Mascot |        |
|   | 2287.9848                                          | 2287.9623   | -0.0225  | -11   | 939          | 953      | QLFADADHIPTQDDWK    |    |       |         |              |      | Phospho (ST)[12]                                                |     |  |  |        | Mascot |        |
|   | 2238.9841                                          | 2238.9404   | -0.0437  | -20   | 42           | 58       | LDYLIENEYEPVLDLR    |    |       |         |              |      | Phospho (Y)[3]                                                  |     |  |  |        | Mascot |        |
|   | 2366.9229                                          | 2367.0586   | 0.1357   | 57    | 78           | 94       | FPTFLGAFKYTYSYTLK   |    |       |         |              |      | Phospho (ST)[3], Phospho (Y)[10,11,14]                          |     |  |  |        | Mascot |        |
|   | 2509.2441                                          | 2508.9763   | -0.2678  | -107  | 392          | 414      | MVNSKIVASLLSLAGT    |    |       |         |              |      | Carbamidomethyl (C)[3], Oxidation (M)[1]                        |     |  |  |        | Mascot |        |
|   |                                                    |             |          |       |              |          | GYSTR               |    |       |         |              |      | Phospho (Y)[20]                                                 |     |  |  |        | Mascot |        |
|   | 2552.3396                                          | 2552.1208   | -0.2188  | -86   | 1034         | 1056     | IDITYAAATQHVDQGLSLT |    |       |         |              |      |                                                                 |     |  |  |        | Mascot |        |
|   |                                                    |             |          |       |              |          | LFK                 |    |       |         |              |      |                                                                 |     |  |  |        |        | Mascot |
|   | 3517.5078                                          | 3517.4856   | -0.0222  | -6    | 544          | 570      | QVYNLHVGHGTYTIRGA   |    |       |         |              |      | Carbamidomethyl (C)[23], Phospho (ST)[10,12], Phospho (Y)[3,13] |     |  |  |        | Mascot |        |
| 3 | ribonucleotide-diphosphate reductase subunit alpha |             |          |       | gil108798785 | 79307.2  | 6.12                | 19 | 277   |         |              | 100  | 233                                                             | 100 |  |  |        |        |        |
|   | [Mycobacterium sp. MCS]                            |             |          |       |              |          |                     |    |       |         |              |      |                                                                 |     |  |  |        |        |        |
|   | Peptide Information                                |             |          |       |              |          |                     |    |       |         |              |      |                                                                 |     |  |  |        |        |        |
|   | Calc. Mass                                         | Obsrv. Mass | ± da     | ± ppm | Start        | End      | Sequence            |    | Ion   | C. I. % | Modification | Rank | Result Type                                                     |     |  |  |        |        |        |
|   |                                                    |             |          |       | Seq.         | Seq.     |                     |    | Score |         |              |      |                                                                 |     |  |  |        |        |        |
|   | 828.4614                                           | 828.3935    | -0.0679  | -82   | 669          | 674      | TLYYIR              |    |       |         |              |      |                                                                 |     |  |  |        | Mascot |        |
|   | 907.4784                                           | 907.4011    | -0.0773  | -85   | 658          | 664      | AQIYAWR             |    | 26    | 0       |              |      |                                                                 |     |  |  |        | Mascot |        |
|   | 907.4784                                           | 907.4011    | -0.0773  | -85   | 658          | 664      | AQIYAWR             |    |       |         |              |      |                                                                 |     |  |  |        | Mascot |        |
|   | 1009.4948                                          | 1009.4092   | -0.0856  | -85   | 54           | 61       | EVLDDYSR            |    |       |         |              |      |                                                                 |     |  |  |        | Mascot |        |
|   |                                                    | 1009.4092   |          |       |              |          |                     |    |       |         |              |      |                                                                 |     |  |  |        |        | Mascot |
|   | 1027.5612                                          | 1027.4716   | -0.0896  | -87   | 78           | 86       | FPTFLGAFK           |    |       |         |              |      |                                                                 |     |  |  |        | Mascot |        |
|   | 1029.5575                                          | 1029.4779   | -0.0796  | -77   | 127          | 135      | LVDEIDGR            |    |       |         |              |      |                                                                 |     |  |  |        | Mascot |        |
|   | 1107.5275                                          | 1107.4509   | -0.0766  | -69   | 78           | 86       | FPTFLGAFK           |    |       |         |              |      | Phospho (ST)[3]                                                 |     |  |  |        | Mascot |        |
|   | 1169.7001                                          | 1169.6041   | -0.096   | -82   | 183          | 194      | GGVALLSNIR          |    | 4     | 0       |              |      |                                                                 |     |  |  |        | Mascot |        |
|   | 1169.7001                                          | 1169.6041   | -0.096   | -82   | 183          | 194      | GGVALLSNIR          |    |       |         |              |      |                                                                 |     |  |  |        | Mascot |        |
|   | 1177.483                                           | 1177.5038   | 0.0206   | 18    | 310          | 316      | YYEMVDDSR           |    |       |         |              |      |                                                                 |     |  |  |        | Mascot |        |
|   | 1179.531                                           | 1179.5062   | -0.0248  | -21   | 162          | 171      | IEDNESIGR           |    |       |         |              |      | Oxidation (M)[5]                                                |     |  |  |        | Mascot |        |
|   | 1407.7267                                          | 1407.597    | -0.1297  | -92   | 136          | 148      | FQPATPTFLNSGK       |    | 31    | 0       |              |      |                                                                 |     |  |  |        | Mascot |        |
|   | 1407.7267                                          | 1407.597    | -0.1297  | -92   | 136          | 148      | FQPATPTFLNSGK       |    |       |         |              |      |                                                                 |     |  |  |        | Mascot |        |
|   | 1461.7631                                          | 1461.6401   | -0.123   | -84   | 150          | 161      | QRGEPVSCFLLR        |    |       |         |              |      | Carbamidomethyl (C)[8]                                          |     |  |  |        | Mascot |        |
|   | 1683.8336                                          | 1683.6906   | -0.143   | -85   | 216          | 230      | LLEDSFSYANQLGAR     |    |       |         |              | 97   | 99.999                                                          |     |  |  |        | Mascot |        |
|   | 1683.8336                                          | 1683.6906   | -0.143   | -85   | 216          | 230      | LLEDSFSYANQLGAR     |    |       |         |              |      |                                                                 |     |  |  |        | Mascot |        |
|   | 1763.7999                                          | 1763.709    | -0.0909  | -52   | 216          | 230      | LLEDSFSYANQLGAR     |    |       |         |              |      | Phospho (Y)[8]                                                  |     |  |  |        | Mascot |        |
|   | 1763.8633                                          | 1763.709    | -0.1543  | -87   | 404          | 419      | AMDSPDFAQTIEVAIR    |    | 63    | 95.618  |              |      |                                                                 |     |  |  |        | Mascot |        |
|   | 1779.6914                                          | 1779.7051   | -0.1531  | -86   | 404          | 419      | AMDSPDFAQTIEVAIR    |    |       |         |              |      |                                                                 |     |  |  |        | Mascot |        |
|   | 1815.7632                                          | 1815.8851   | 0.1219</ |       |              |          |                     |    |       |         |              |      |                                                                 |     |  |  |        |        |        |



|              |                                                                                             |               |            |            |            |               |                    |               |               |                                        |               |               |                                            |                                           |               |               |                        |               |  |                |                    |  |  |
|--------------|---------------------------------------------------------------------------------------------|---------------|------------|------------|------------|---------------|--------------------|---------------|---------------|----------------------------------------|---------------|---------------|--------------------------------------------|-------------------------------------------|---------------|---------------|------------------------|---------------|--|----------------|--------------------|--|--|
|              | 1425.6678                                                                                   | 1425.6527     | -0.1151    | -81        | 343        | 355           | MGDDFLSATEALR      |               |               | 57                                     | 82.613        |               |                                            |                                           |               |               |                        | Mascot        |  |                |                    |  |  |
|              | 1441.8627                                                                                   | 1441.5455     | -0.1172    | -81        | 343        | 355           | MGDDFLSATEALR      |               |               |                                        |               |               |                                            |                                           |               |               |                        | Mascot        |  |                |                    |  |  |
|              | 1663.8551                                                                                   | 1663.7189     | -0.1362    | -82        | 298        | 312           | DFVLAHSSAHPDVLNR   |               |               |                                        |               |               | Oxidation (M)[1]                           |                                           |               |               |                        | Mascot        |  |                |                    |  |  |
|              | 1793.9857                                                                                   | 1793.8171     | -0.15      | -84        | 158        | 173           | QILAQGPISGPGWNR    |               |               |                                        |               |               |                                            |                                           |               |               |                        | Mascot        |  |                |                    |  |  |
|              | 1793.9857                                                                                   | 1793.8157     | -0.15      | -84        | 158        | 173           | QILAQGPISGPGWNR    |               |               | 118                                    | 100           |               |                                            |                                           |               |               |                        | Mascot        |  |                |                    |  |  |
|              | 1870.8429                                                                                   | 1870.6825     | -0.1604    | -86        | 527        | 542           | ETFVPPNTNHYPHMEA   |               |               |                                        |               |               |                                            |                                           |               |               |                        | Mascot        |  |                |                    |  |  |
|              | 1886.8378                                                                                   | 1886.678      | -0.1598    | -85        | 527        | 542           | ETFVPPNTNHYPHMEA   |               |               |                                        |               |               |                                            | Oxidation (M)[14]                         |               |               |                        | Mascot        |  |                |                    |  |  |
|              | 1913.8876                                                                                   | 1913.7261     | -0.1615    | -84        | 356        | 373           | YGDVADLTNYGGAVIDD  |               |               |                                        |               |               |                                            |                                           |               |               |                        | Mascot        |  |                |                    |  |  |
|              |                                                                                             |               |            |            |            |               | R                  |               |               |                                        |               |               |                                            |                                           |               |               |                        |               |  |                |                    |  |  |
|              | 1950.8092                                                                                   | 1950.6316     | -0.1776    | -91        | 527        | 542           | ETFVPPNTNHYPHMEA   |               |               |                                        |               |               |                                            | Phospho (Y)[11]                           |               |               |                        | Mascot        |  |                |                    |  |  |
|              |                                                                                             | 1950.6316     |            |            |            |               |                    |               |               |                                        |               |               |                                            |                                           |               |               |                        | Mascot        |  |                |                    |  |  |
|              | 1993.8539                                                                                   | 1993.8054     | -0.0485    | -24        | 356        | 373           | YGDVADLTNYGGAVIDD  |               |               |                                        |               |               |                                            | Phospho (Y)[11]                           |               |               |                        | Mascot        |  |                |                    |  |  |
|              |                                                                                             |               |            |            |            |               | R                  |               |               |                                        |               |               |                                            |                                           |               |               |                        |               |  |                |                    |  |  |
|              | 2043.0559                                                                                   | 2042.8778     | -0.1781    | -87        | 258        | 275           | LAGHFTGSTATFQHLWR  |               |               |                                        |               |               |                                            |                                           |               |               |                        | Mascot        |  |                |                    |  |  |
|              | 2184.0066                                                                                   | 2183.813      | -0.1936    | -89        | 133        | 150           | SAYQAEIDAPCELDVWR  |               |               |                                        |               |               |                                            | Carbamidomethyl (C)[11]                   |               |               |                        | Mascot        |  |                |                    |  |  |
|              | 2184.0066                                                                                   | 2183.813      | -0.1936    | -89        | 133        | 150           | SAYQAEIDAPCELDVWR  |               |               | 150                                    | 100           |               |                                            | Carbamidomethyl (C)[11]                   |               |               |                        | Mascot        |  |                |                    |  |  |
|              | 2209.1458                                                                                   | 2208.9548     | -0.191     | -86        | 70         | 92            | LGLTNAEHADASAIEA   |               |               |                                        |               |               |                                            |                                           |               |               |                        | Mascot        |  |                |                    |  |  |
|              |                                                                                             |               |            |            |            |               | AIAAK              |               |               |                                        |               |               |                                            |                                           |               |               |                        |               |  |                |                    |  |  |
|              | 2282.9548                                                                                   | 2282.9783     | 0.0235     | 10         | 258        | 275           | LAGHFTGSTATFQHLWR  |               |               |                                        |               |               |                                            | Phospho (ST)[9], Phospho (ST)[7,10]       |               |               |                        | Mascot        |  |                |                    |  |  |
|              | 2298.1755                                                                                   | 2297.9814     | -0.1941    | -84        | 298        | 317           | DFVLAHSSAHPDVLRTAL |               |               |                                        |               |               |                                            | Phospho (ST)[7]                           |               |               |                        | Mascot        |  |                |                    |  |  |
|              |                                                                                             |               |            |            |            |               | IR                 |               |               |                                        |               |               |                                            |                                           |               |               |                        |               |  |                |                    |  |  |
|              | 2405.2571                                                                                   | 2405.0427     | -0.2144    | -89        | 290        | 312           | LVGETGKDFVLAHSSA   |               |               |                                        |               |               |                                            |                                           |               |               |                        | Mascot        |  |                |                    |  |  |
|              |                                                                                             |               |            |            |            |               | HPDILR             |               |               |                                        |               |               |                                            |                                           |               |               |                        |               |  |                |                    |  |  |
|              | 2603.3689                                                                                   | 2603.1404     | -0.2285    | -88        | 28         | 51            | LTALHDLASTHIDLPHVI |               |               |                                        |               |               |                                            |                                           |               |               |                        | Mascot        |  |                |                    |  |  |
|              |                                                                                             |               |            |            |            |               | GGEHR              |               |               |                                        |               |               |                                            |                                           |               |               |                        |               |  |                |                    |  |  |
|              | 2714.332                                                                                    | 2714.0879     | -0.2441    | -90        | 477        | 502           | YAAGNFYNDKPTGAVVG  |               |               | 146                                    | 100           |               |                                            |                                           |               |               |                        | Mascot        |  |                |                    |  |  |
|              |                                                                                             |               |            |            |            |               | QQPFGGSR           |               |               |                                        |               |               |                                            |                                           |               |               |                        |               |  |                |                    |  |  |
|              | 2714.332                                                                                    | 2714.0879     | -0.2441    | -90        | 477        | 502           | YAAGNFYNDKPTGAVVG  |               |               |                                        |               |               |                                            |                                           |               |               |                        | Mascot        |  |                |                    |  |  |
|              |                                                                                             |               |            |            |            |               | QQPFGGSR           |               |               |                                        |               |               |                                            |                                           |               |               |                        |               |  |                |                    |  |  |
|              | 2724.2571                                                                                   | 2724.0105     | -0.2466    | -91        | 1          | 25            | MDAITDVPTANEPIDHY  |               |               |                                        |               |               |                                            |                                           |               |               |                        | Mascot        |  |                |                    |  |  |
|              |                                                                                             |               |            |            |            |               | APFSQER            |               |               |                                        |               |               |                                            |                                           |               |               |                        |               |  |                |                    |  |  |
|              | 2740.252                                                                                    | 2740.0168     | -0.2352    | -86        | 1          | 25            | MDAITDVPTANEPIDHY  |               |               |                                        |               |               |                                            | Oxidation (M)[1]                          |               |               |                        | Mascot        |  |                |                    |  |  |
|              |                                                                                             |               |            |            |            |               | APFSQER            |               |               |                                        |               |               |                                            |                                           |               |               |                        |               |  |                |                    |  |  |
|              | 3337.5269                                                                                   | 3337.4487     | -0.0782    | -23        | 122        | 150           | VAAATMLGOSKSAQAEI  |               |               |                                        |               |               |                                            | Carbamidomethyl (C)[22], Oxidation (M)[6] |               |               |                        | Mascot        |  |                |                    |  |  |
|              |                                                                                             |               |            |            |            |               | DAPCELDVWR         |               |               |                                        |               |               |                                            | Phospho (Y)[14]                           |               |               |                        |               |  |                |                    |  |  |
|              | 3338.55                                                                                     | 3338.4436     | -0.1064    | -32        | 28         | 57            | LTALHDLASTHIDLPHVI |               |               |                                        |               |               |                                            | Oxidation (M)[25], Phospho (ST)[2,3]      |               |               |                        | Mascot        |  |                |                    |  |  |
|              |                                                                                             |               |            |            |            |               | GGEHRMGSGAR        |               |               |                                        |               |               |                                            |                                           |               |               |                        |               |  |                |                    |  |  |
| 2            | delta-1-pyrroline-5-carboxylate dehydrogenase [Acidothermus cellulolyticus 11B]             |               |            |            |            |               |                    |               |               |                                        |               |               |                                            |                                           |               |               |                        |               |  |                |                    |  |  |
|              | Peptide Information                                                                         |               |            |            |            |               |                    |               |               |                                        |               |               |                                            |                                           |               |               |                        |               |  |                |                    |  |  |
|              | Calc. Mass                                                                                  | Obsrv. Mass   | ± da       | ± ppm      | Start      | End           | Sequence           | Ion           | C. I. %       | Modification                           | Rank          | Result Type   |                                            |                                           |               |               |                        |               |  |                |                    |  |  |
|              |                                                                                             |               |            |            | Seq.       | Seq.          |                    | Score         |               |                                        |               |               |                                            |                                           |               |               |                        |               |  |                |                    |  |  |
|              | 824.2739                                                                                    | 824.3768      | 0.1029     | 125        | 520        | 524           | WTTTR              |               |               |                                        |               |               | Phospho (ST)[2,3]                          |                                           |               |               | Mascot                 |               |  |                |                    |  |  |
|              | 873.5152                                                                                    | 873.3713      | -0.144     | -165       | 33         | 40            | LKQLAASR           |               |               |                                        |               |               |                                            |                                           |               |               |                        | Mascot        |  |                |                    |  |  |
|              | 947.4039                                                                                    | 947.3994      | -0.0045    | -5         | 538        | 544           | YPMEDR             |               |               |                                        |               |               |                                            |                                           |               |               |                        | Mascot        |  |                |                    |  |  |
|              | 963.3989                                                                                    | 963.4557      | 0.0568     | 59         | 538        | 544           | YPMEDR             |               |               |                                        |               |               | Oxidation (M)[4]                           |                                           |               |               |                        | Mascot        |  |                |                    |  |  |
|              | 1013.4485                                                                                   | 1013.3864     | -0.0621    | -61        | 468        | 475           | ATLACER            |               |               |                                        |               |               | Carbamidomethyl (C)[6], Phospho (ST)[3]    |                                           |               |               | Mascot                 |               |  |                |                    |  |  |
|              | 1250.6232                                                                                   | 1250.5396     | -0.0836    | -67        | 121        | 133           | AAMAATMLGOSK       |               |               |                                        |               |               |                                            |                                           |               |               |                        | Mascot        |  |                |                    |  |  |
|              | 1346.5844                                                                                   | 1346.54       | -0.0444    | -33        | 121        | 133           | AAMAATMLGOSK       | 8             | 0             | Oxidation (M)[3], Phospho (ST)[12]     |               |               |                                            |                                           |               |               | Mascot                 |               |  |                |                    |  |  |
|              | 1346.5844                                                                                   | 1346.54       | -0.0444    | -33        | 121        | 133           | AAMAATMLGOSK       |               |               | Oxidation (M)[3], Phospho (ST)[7]      |               |               |                                            |                                           |               |               |                        | Mascot        |  |                |                    |  |  |
|              | 1776.7354                                                                                   | 1776.7869     | 0.0535     | 30         | 13         | 26            | NEPVDYRPSTAEK      |               |               |                                        |               |               | Phospho (ST)[1], Phospho (Y)[7]            |                                           |               |               | Mascot                 |               |  |                |                    |  |  |
|              | 1870.6632                                                                                   | 1870.6825     | 0.0193     | 10         | 319        | 333           | GAFYDYGKCSAVSR     |               |               |                                        |               |               | Phospho (ST)[11,14], Phospho (Y)[5]        |                                           |               |               | Mascot                 |               |  |                |                    |  |  |
|              | 1908.7694                                                                                   | 1908.6544     | -0.115     | -60        | 160        | 174           | ILADQPLSTPTGWNK    |               |               |                                        |               |               | Phospho (ST)[8], Phospho (ST)[9,12]        |                                           |               |               | Mascot                 |               |  |                |                    |  |  |
|              | 2261.0002                                                                                   | 2260.835      | -0.1652    | -73        | 134        | 151           | TCYQAEIDAICELADFWR |               |               |                                        |               |               | Carbamidomethyl (C)[2,11]                  |                                           |               |               | Mascot                 |               |  |                |                    |  |  |
|              | 2283.9451                                                                                   | 2283.9736     | 0.0285     | 12         | 134        | 151           | TCYQAEIDAICELADFWR |               |               |                                        |               |               | Carbamidomethyl (C)[2,11]                  |                                           |               |               | Mascot                 |               |  |                |                    |  |  |
|              | 2714.332                                                                                    | 2714.0879     | -0.2441    | -90        | 478        | 503           | YAAGNFYNDKPTGAVVG  | 146           | 100           | Carbamidomethyl (C)[2], Phospho (Y)[3] |               |               |                                            |                                           |               |               | Mascot                 |               |  |                |                    |  |  |
|              |                                                                                             |               |            |            |            |               | QQPFGGSR           |               |               |                                        |               |               |                                            |                                           |               |               |                        |               |  |                |                    |  |  |
|              | 2714.332                                                                                    | 2714.0879     | -0.2441    | -90        | 478        | 503           | YAAGNFYNDKPTGAVVG  |               |               |                                        |               |               |                                            |                                           |               |               |                        | Mascot        |  |                |                    |  |  |
|              |                                                                                             |               |            |            |            |               | QQPFGGSR           |               |               |                                        |               |               |                                            |                                           |               |               |                        |               |  |                |                    |  |  |
| 3            | delta-1-pyrroline-5-carboxylate dehydrogenase [Kneococcus radiotolerans SRS30216]           |               |            |            |            |               |                    |               |               |                                        |               |               |                                            |                                           |               |               |                        |               |  |                |                    |  |  |
|              | Peptide Information                                                                         |               |            |            |            |               |                    |               |               |                                        |               |               |                                            |                                           |               |               |                        |               |  |                |                    |  |  |
|              | Calc. Mass                                                                                  | Obsrv. Mass   | ± da       | ± ppm      | Start      | End           | Sequence           | Ion           | C. I. %       | Modification                           | Rank          | Result Type   |                                            |                                           |               |               |                        |               |  |                |                    |  |  |
|              |                                                                                             |               |            |            | Seq.       | Seq.          |                    | Score         |               |                                        |               |               |                                            |                                           |               |               |                        |               |  |                |                    |  |  |
|              | 1250.5251                                                                                   | 1250.5396     | 0.0145     | 12         | 122        | 132           | IAAATMLGOSK        |               |               |                                        |               |               | Phospho (ST)[10], Phospho (ST)[5]          |                                           |               |               | Mascot                 |               |  |                |                    |  |  |
|              | 1329.6311                                                                                   | 1329.5137     | -0.1174    | -88        | 374        | 384           | SYARNYAAIER        |               |               |                                        |               |               | Phospho (Y)[2]                             |                                           |               |               | Mascot                 |               |  |                |                    |  |  |
|              | 2280.9216                                                                                   | 2280.835      | -0.0866    | -38        | 83         | 103           | AAADAAALAAPEWAAMD  |               |               |                                        |               |               | Oxidation (M)[16], Phospho (Y)[18]         |                                           |               |               | Mascot                 |               |  |                |                    |  |  |
|              |                                                                                             |               |            |            |            |               | YDDR               |               |               |                                        |               |               |                                            |                                           |               |               |                        |               |  |                |                    |  |  |
|              | 2603.344                                                                                    | 2603.1404     | -0.2036    | -78        | 26         | 49            | ERLLAALAEQTANPVELT |               |               |                                        |               |               | Phospho (ST)[11]                           |                                           |               |               | Mascot                 |               |  |                |                    |  |  |
|              |                                                                                             |               |            |            |            |               | QTIGKK             |               |               |                                        |               |               |                                            |                                           |               |               |                        |               |  |                |                    |  |  |
|              | 2714.332                                                                                    | 2714.0879     | -0.2441    | -90        | 480        | 505           | FTAGNFYNDKPTGAVV   | 96            | 99.998        |                                        |               |               |                                            |                                           |               |               | Mascot                 |               |  |                |                    |  |  |
|              |                                                                                             |               |            |            |            |               | GQPFGGSR           |               |               |                                        |               |               |                                            |                                           |               |               |                        |               |  |                |                    |  |  |
|              | 2714.332                                                                                    | 2714.0879     | -0.2441    | -90        | 480        | 505           | FTAGNFYNDKPTGAVV   |               |               |                                        |               |               |                                            |                                           |               |               |                        | Mascot        |  |                |                    |  |  |
|              |                                                                                             |               |            |            |            |               | GQPFGGSR           |               |               |                                        |               |               |                                            |                                           |               |               |                        |               |  |                |                    |  |  |
|              | 2779.9731                                                                                   | 2779.6926     | -0.2805    | -101       | 351        | 373           | VDSLSDYGVDSLHFGG   |               |               |                                        |               |               | Phospho (ST)[3,5,10,13], Phospho (Y)[6]    |                                           |               |               | Mascot                 |               |  |                |                    |  |  |
|              |                                                                                             |               |            |            |            |               | AVIDAR             |               |               |                                        |               |               |                                            |                                           |               |               |                        |               |  |                |                    |  |  |
|              | 2779.9731                                                                                   | 2780.1946     | 0.2215     | 80         | 351        | 373           | VDSLSDYGVDSLHFGG   |               |               |                                        |               |               | Phospho (ST)[3,5,10,13], Phospho (Y)[6]    |                                           |               |               | Mascot                 |               |  |                |                    |  |  |
|              |                                                                                             |               |            |            |            |               | AVIDAR             |               |               |                                        |               |               |                                            |                                           |               |               |                        |               |  |                |                    |  |  |
|              | 3337.1731                                                                                   | 3337.4487     | 0.2756     | 83         | 351        | 377           | VDSLSDYGVDSLHFGG   |               |               |                                        |               |               | Phospho (ST)[3,5,10,13], Phospho (Y)[6,25] |                                           |               |               | Mascot                 |               |  |                |                    |  |  |
|              |                                                                                             |               |            |            |            |               | AVIDARSTAR         |               |               |                                        |               |               |                                            |                                           |               |               |                        |               |  |                |                    |  |  |
| 4            | 1-pyrroline-5-carboxylate dehydrogenase [Mycobacterium avium 104]                           |               |            |            |            |               |                    |               |               |                                        |               |               |                                            |                                           |               |               |                        |               |  |                |                    |  |  |
|              | Peptide Information                                                                         |               |            |            |            |               |                    |               |               |                                        |               |               |                                            |                                           |               |               |                        |               |  |                |                    |  |  |
|              | Calc. Mass                                                                                  | Obsrv. Mass   | ± da       | ± ppm      | Start      | End           | Sequence           | Ion           | C. I. %       | Modification                           | Rank          | Result Type   |                                            |                                           |               |               |                        |               |  |                |                    |  |  |
|              |                                                                                             |               |            |            | Seq.       | Seq.          |                    | Score         |               |                                        |               |               |                                            |                                           |               |               |                        |               |  |                |                    |  |  |
|              | 824.4413                                                                                    | 824.3768      | -0.0645    | -78        | 163        | 169           | FNVAFAK            |               |               |                                        |               |               |                                            |                                           |               |               |                        | Mascot        |  |                |                    |  |  |
|              | 863.537                                                                                     | 863.4557      | -0.0813    | -84        | 70         | 77            | IDVYQPIK           |               |               |                                        |               |               |                                            |                                           |               |               |                        | Mascot        |  |                |                    |  |  |
|              | 1013.4686                                                                                   | 1013.3864     | -0.0822    | -81        | 330        | 338           | GAFDYQK            |               |               |                                        |               |               |                                            |                                           |               |               |                        | Mascot        |  |                |                    |  |  |
|              | 1250.5251                                                                                   | 1250.5396     | 0.0145     | 12         | 144        | 144           | IAAATMLGOSK        |               |               |                                        |               |               | Phospho (ST)[10], Phospho (ST)[5]          |                                           |               |               | Mascot                 |               |  |                |                    |  |  |
|              | 1793.9293                                                                                   | 1793.8157     | -0.1136    | -63        | 170        | 185           | QILAQGPISGPGWNR    |               |               |                                        |               |               |                                            |                                           |               |               |                        | Mascot        |  |                |                    |  |  |
|              | 1793.9293                                                                                   | 1793.8157     | -0.1136    | -63        | 170        | 185           | QILAQGPISGPGWNR    | 77            | 99.849        |                                        |               |               |                                            |                                           |               |               | Mascot                 |               |  |                |                    |  |  |
|              | 1892.7316                                                                                   | 1892.6631     | -0.0685    | -36        | 239        | 253           | CSAASRAFIQSVWR     |               |               |                                        |               |               | Phospho (ST)[2,5,12]                       |                                           |               |               | Mascot                 |               |  |                |                    |  |  |
|              | 2298.6824                                                                                   | 2298.9549     | 0.2724     | 123        | 539        | 555           | ETFVPTADHTYPMAGAD  |               |               |                                        |               |               | Phospho (ST)[2,7,10], Phospho (Y)[11]      |                                           |               |               | Mascot                 |               |  |                |                    |  |  |
|              | 2224.6772                                                                                   | 2224.8243     | 0.2471     | 111        | 538        | 555           | ETFVPTADHTYPMAGAD  |               |               |                                        |               |               | Oxidation (M)[14], Phospho (ST)[2,7,10]    |                                           |               |               | Mascot                 |               |  |                |                    |  |  |
|              |                                                                                             |               |            |            |            |               |                    |               |               |                                        |               |               | Phospho (Y)[11]                            |                                           |               |               |                        | Mascot        |  |                |                    |  |  |
| Gel Idx/Pos  | 178/H5                                                                                      |               |            |            |            |               |                    |               |               |                                        |               |               |                                            |                                           |               |               | Instr./Gel Origin      | BA2060/12115A |  | Process Status | Analysis Succeeded |  |  |
| Plate #/Name | [1] 31598                                                                                   |               |            |            |            |               |                    |               |               |                                        |               |               |                                            |                                           |               |               | Instrument Sample Name |               |  | Spectra        | 8                  |  |  |
| Rank         | Protein Name                                                                                | Accession No. | Protein MW | Protein PI | Pep. Count | Protein Score | Protein Score      | Protein Score | Protein Score | Protein Score                          | Protein Score | Protein Score | Protein Score                              | Protein Score                             | Protein Score | Protein Score | Protein Score          | Protein Score |  |                |                    |  |  |
| 1            | ATP-dependent malicase, dead/deaf box family protein [Mycobacterium smegmatis str. MC2 155] | gi118470234   | 63684.6    | 7.29       | 20         | 252           | 100                | 217           | 100           |                                        |               |               |                                            |                                           |               |               |                        |               |  |                |                    |  |  |
|              | Peptide Information                                                                         |               |            |            |            |               |                    |               |               |                                        |               |               |                                            |                                           |               |               |                        |               |  |                |                    |  |  |
|              | Calc. Mass                                                                                  | Obsrv. Mass   | ± da       | ± ppm      | Start      | End           | Sequence           | Ion           | C. I. %       | Modification                           | Rank          | Result Type   |                                            |                                           |               |               |                        |               |  |                |                    |  |  |
|              |                                                                                             |               |            |            | Seq.       | Seq.          |                    | Score         |               |                                        |               |               |                                            |                                           |               |               |                        |               |  |                |                    |  |  |
|              | 850.4451                                                                                    | 850.4596      | 0.0145     | 17         | 247        | 253           | KMDALTR            |               |               |                                        |               |               | Oxidation (M)[2]                           |                                           |               |               | Mascot                 |               |  |                |                    |  |  |
|              | 887.5097                                                                                    | 887.4251      | -0.0846    | -95        | 239        | 246           | FIQVAGP            |               |               |                                        |               |               |                                            |                                           |               |               |                        | Mascot        |  |                |                    |  |  |
|              | 937.4625                                                                                    | 937.38        | -0.0825    | -88        | 421        | 427           | LIEDYER            |               |               |                                        |               |               |                                            |                                           |               |               |                        | Mascot        |  |                |                    |  |  |
|              | 1045.6                                                                                      | 1045.4651     | -0.1349    | -129       | 540        | 548           | TLKALENTR          |               |               |                                        |               |               |                                            |                                           |               |               |                        | Mascot        |  |                |                    |  |  |
|              | 1086.5691                                                                                   | 1086.4663     | -0.1028    | -95        | 516        | 524           | NEFGHTIR           |               |               |                                        |               |               | Phospho (ST)[7]                            |                                           |               |               | Mascot                 |               |  |                |                    |  |  |
|              | 1180.5354                                                                                   | 1186.4423     | -0.0931    | -80        | 516        | 524           | NEFGHTIR           |               |               |                                        |               |               |                                            |                                           |               |               |                        | Mascot        |  |                |                    |  |  |
|              | 1183.6582                                                                                   | 1183.5469     | -0.1114    | -94        | 357        | 367           | SGHALVLTPTK        |               |               |                                        |               |               |                                            |                                           |               |               |                        | Mascot        |  |                |                    |  |  |
|              | 1303.7004                                                                                   | 1303.5739     | -0.1265    | -97        | 100        | 111           | ELALQVAEAFGR       |               |               |                                        |               |               |                                            |                                           |               |               |                        | Mascot        |  |                |                    |  |  |
|              | 1303.7004                                                                                   | 1303.5739     | -0.1265    | -97        | 100        | 111           | ELALQVAEAFGR       | 44            | 0             |                                        |               |               |                                            |                                           |               |               |                        |               |  |                |                    |  |  |





**Table S4. Differential Gene Expression Profile of WT PknK and K55M mutant PknK overexpression strains as a function of growth**

|                              | Up Regulated Genes <sup>a</sup>   |                                    |            |                      |                               |
|------------------------------|-----------------------------------|------------------------------------|------------|----------------------|-------------------------------|
| Strain_Condition             | Cellular Processes and Signaling  | Information Storage and Processing | Metabolism | Poorly Characterized | Total No. of DEG <sup>c</sup> |
| WT <sub>OE</sub> vs VC_24 h  | 6                                 | 21                                 | 52         | 20                   | 99                            |
| Mut <sub>OE</sub> vs VC_24 h | 13                                | 24                                 | 32         | 18                   | 87                            |
| WT <sub>OE</sub> vs VC_96 h  | 103                               | 121                                | 316        | 192                  | 732                           |
| Mut <sub>OE</sub> vs VC_96 h | 11                                | 10                                 | 38         | 10                   | 69                            |
|                              |                                   |                                    |            |                      |                               |
|                              |                                   |                                    |            |                      |                               |
|                              | Down Regulated Genes <sup>b</sup> |                                    |            |                      |                               |
| Strain_Condition             | Cellular Processes and Signaling  | Information Storage and Processing | Metabolism | Poorly Characterized | Total No. of DEG <sup>c</sup> |
| WT <sub>OE</sub> vs VC_24 h  | 33                                | 37                                 | 124        | 75                   | 269                           |
| Mut <sub>OE</sub> vs VC_24 h | 23                                | 29                                 | 116        | 65                   | 233                           |
| WT <sub>OE</sub> vs VC_96 h  | 43                                | 82                                 | 295        | 140                  | 560                           |
| Mut <sub>OE</sub> vs VC_96 h | 12                                | 33                                 | 43         | 35                   | 123                           |
|                              |                                   |                                    |            |                      |                               |

<sup>a</sup> Upregulated - fold greater than 1 (log base<sub>2</sub>)

<sup>b</sup> Downregulated - fold less than 1 (log base<sub>2</sub>)

<sup>c</sup> DEG -Differentially expressed genes

COG annotation was performed using COGs functional categories classification (<http://www.ncbi.nlm.nih.gov/COG> )

| LIX79 t24-1 vs. LIX70 t24-1 |                                                            |          |                                    |           |              |         |            |
|-----------------------------|------------------------------------------------------------|----------|------------------------------------|-----------|--------------|---------|------------|
| GeneName                    | Product                                                    | COG_Code | Function                           | RV Number | Geomean Fold | P-value | Regulation |
| MSMEG_0699                  | hypothetical protein                                       | O        | CELLULAR PROCESSES AND SIGNALING   |           | 1.17         | 0.260   | Up         |
| MSMEG_3448                  | two-component system sensor kinase                         | T        | CELLULAR PROCESSES AND SIGNALING   |           | 1.01         | 0.047   | Up         |
| MSMEG_2695                  | hypothetical protein                                       | T        | CELLULAR PROCESSES AND SIGNALING   | RV2744C   | 1.18         | 0.272   | Up         |
| subB                        | FeS assembly protein SufB                                  | O        | CELLULAR PROCESSES AND SIGNALING   | RV1461    | 2.06         | 0.354   | Up         |
| MSMEG_5481                  | hypothetical protein                                       | O        | CELLULAR PROCESSES AND SIGNALING   | RV0990C   | 1.04         | 0.425   | Up         |
| MSMEG_0155                  | transcriptional regulator                                  | T        | CELLULAR PROCESSES AND SIGNALING   |           | 1.27         | 0.490   | Up         |
| rplV                        | 50S ribosomal protein L22                                  | J        | INFORMATION STORAGE AND PROCESSING | Rv0706    | 1.13         | 0.128   | Up         |
| MSMEG_4486                  | ArsR family transcriptional regulator                      | K        | INFORMATION STORAGE AND PROCESSING | RV2358    | 1.51         | 0.445   | Up         |
| MSMEG_5229                  | hypothetical protein                                       | J        | INFORMATION STORAGE AND PROCESSING |           | 1.37         | 0.023   | Up         |
| MSMEG_0778                  | transcriptional regulator                                  | K        | INFORMATION STORAGE AND PROCESSING |           | 1.26         | 0.038   | Up         |
| MSMEG_4154                  | transposase, Mutator family protein                        | L        | INFORMATION STORAGE AND PROCESSING | RV3431C   | 2.60         | 0.044   | Up         |
| MSMEG_2794                  | GntR family transcriptional regulator                      | K        | INFORMATION STORAGE AND PROCESSING |           | 3.61         | 0.054   | Up         |
| rpsS                        | 30S ribosomal protein S19                                  | J        | INFORMATION STORAGE AND PROCESSING | Rv0705    | 1.06         | 0.101   | Up         |
| MSMEG_4948                  | Sua5/YciO/YrdC/YwC family protein                          | J        | INFORMATION STORAGE AND PROCESSING | RV1301    | 1.07         | 0.129   | Up         |
| MSMEG_3959                  | transcriptional regulator                                  | K        | INFORMATION STORAGE AND PROCESSING |           | 2.05         | 0.149   | Up         |
| MSMEG_1445                  | 30S ribosomal protein S17                                  | J        | INFORMATION STORAGE AND PROCESSING | Rv0710    | 1.01         | 0.188   | Up         |
| MSMEG_3606                  | transcriptional regulator                                  | K        | INFORMATION STORAGE AND PROCESSING |           | 1.02         | 0.190   | Up         |
| MSMEG_3960                  | transcriptional regulator                                  | K        | INFORMATION STORAGE AND PROCESSING |           | 1.85         | 0.203   | Up         |
| MSMEG_4439                  | acetyltransferase                                          | J        | INFORMATION STORAGE AND PROCESSING |           | 1.07         | 0.203   | Up         |
| MSMEG_3121                  | DNA-binding protein                                        | K        | INFORMATION STORAGE AND PROCESSING | RV1460    | 2.57         | 0.272   | Up         |
| MSMEG_3264                  | transcriptional regulator                                  | K        | INFORMATION STORAGE AND PROCESSING |           | 1.26         | 0.290   | Up         |
| MSMEG_6139                  | HTH-type transcriptional regulator                         | K        | INFORMATION STORAGE AND PROCESSING | RV2912C   | 1.39         | 0.315   | Up         |
| MSMEG_4492                  | amidase                                                    | J        | INFORMATION STORAGE AND PROCESSING | Rv2363    | 1.19         | 0.358   | Up         |
| MSMEG_6441                  | TetR family transcriptional regulator                      | K        | INFORMATION STORAGE AND PROCESSING | Rv3855    | 2.87         | 0.371   | Up         |
| dinP                        | DNA polymerase IV                                          | L        | INFORMATION STORAGE AND PROCESSING |           | 1.65         | 0.398   | Up         |
| MSMEG_2989                  | LacI family transcriptional regulator                      | K        | INFORMATION STORAGE AND PROCESSING |           | 1.33         | 0.404   | Up         |
| MSMEG_5405                  | ArsR family transcriptional regulator                      | K        | INFORMATION STORAGE AND PROCESSING | RV3744    | 1.00         | 0.484   | Up         |
| MSMEG_1546                  | coenzyme B12-dependent glycerol dehydrogenase small su     | Q        | METABOLISM                         |           | 1.42         | 0.047   | Up         |
| MSMEG_3786                  | D-amino acid deaminase                                     | E        | METABOLISM                         |           | 1.21         | 0.055   | Up         |
| MSMEG_6591                  | class V aminotransferase                                   | E        | METABOLISM                         |           | 1.09         | 0.076   | Up         |
| folB                        | dihydroneopterin aldolase                                  | H        | METABOLISM                         | Rv3607c   | 1.24         | 0.129   | Up         |
| MSMEG_6802                  | ABC transporter ATP-binding protein                        | G        | METABOLISM                         |           | 1.29         | 0.158   | Up         |
| MSMEG_3266                  | maltose/maltodextrin-binding protein                       | G        | METABOLISM                         |           | 1.62         | 0.323   | Up         |
| MSMEG_6294                  | caib/baif family protein                                   | C        | METABOLISM                         |           | 1.33         | 0.348   | Up         |
| MSMEG_2680                  | amino acid transporter                                     | E        | METABOLISM                         |           | 1.19         | 0.353   | Up         |
| argC                        | N-acetyl-gamma-glutamyl-phosphate reductase                | E        | METABOLISM                         | Rv1652    | 1.15         | 0.412   | Up         |
| MSMEG_6225                  | proton antiporter efflux pump                              | G        | METABOLISM                         |           | 1.42         | 0.417   | Up         |
| MSMEG_2405                  | MarR family transcriptional regulator                      | E        | METABOLISM                         |           | 1.05         | 0.521   | Up         |
| MSMEG_3269                  | sugar ABC transporter ATP-binding protein                  | G        | METABOLISM                         |           | 1.86         | 0.525   | Up         |
| MSMEG_6804                  | sugar ABC transporter substrate-binding protein            | G        | METABOLISM                         |           | 1.91         | 0.005   | Up         |
| MSMEG_2796                  | integral membrane protein                                  | P        | METABOLISM                         |           | 1.09         | 0.020   | Up         |
| MSMEG_2911                  | integral membrane transporter                              | G        | METABOLISM                         |           | 1.14         | 0.028   | Up         |
| MSMEG_1124                  | ferredoxin FdxA                                            | C        | METABOLISM                         |           | 1.00         | 0.028   | Up         |
| MSMEG_6846                  | C4 decarboxylate transporter                               | G        | METABOLISM                         |           | 1.12         | 0.042   | Up         |
| MSMEG_6046                  | ABC transporter ATP-binding protein                        | P        | METABOLISM                         |           | 2.36         | 0.043   | Up         |
| MSMEG_4527                  | ferredoxin sulfite reductase                               | P        | METABOLISM                         |           | 1.32         | 0.043   | Up         |
| MSMEG_1566                  | oxidoreductase                                             | C        | METABOLISM                         |           | 1.06         | 0.068   | Up         |
| MSMEG_4487                  | ferric uptake regulation protein                           | P        | METABOLISM                         | Rv2359    | 1.31         | 0.075   | Up         |
| MSMEG_4785                  | mce-family protein mce1f                                   | Q        | METABOLISM                         |           | 1.21         | 0.076   | Up         |
| pruA                        | 1-pyrroline-5-carboxylate dehydrogenase                    | C        | METABOLISM                         | Rv1187    | 1.13         | 0.078   | Up         |
| MSMEG_1318                  | polysaccharide deacetylase                                 | G        | METABOLISM                         |           | 2.18         | 0.092   | Up         |
| MSMEG_2471                  | pyruvate dehydrogenase subunit alpha                       | C        | METABOLISM                         |           | 1.89         | 0.115   | Up         |
| MSMEG_6050                  | solute-binding lipoprotein                                 | P        | METABOLISM                         | RV2059    | 1.03         | 0.128   | Up         |
| MSMEG_6047                  | cation ABC transporter periplasmic cation-binding protein  | P        | METABOLISM                         |           | 2.46         | 0.142   | Up         |
| MSMEG_5995                  | P450 heme-thiolate protein                                 | Q        | METABOLISM                         | Rv3545c   | 1.14         | 0.150   | Up         |
| MSMEG_0338                  | acyl-CoA dehydrogenase                                     | I        | METABOLISM                         |           | 1.07         | 0.163   | Up         |
| MSMEG_6262                  | FwdC/FmdC family protein                                   | E        | METABOLISM                         |           | 1.06         | 0.170   | Up         |
| MSMEG_4510                  | peptide synthetase mbf1                                    | Q        | METABOLISM                         | Rv2379c   | 1.10         | 0.173   | Up         |
| MSMEG_5477                  | 2-hydroxy-3-oxopropionate reductase                        | I        | METABOLISM                         |           | 1.00         | 0.193   | Up         |
| MSMEG_2795                  | transmembrane transporter                                  | P        | METABOLISM                         |           | 2.55         | 0.194   | Up         |
| MSMEG_5523                  | peptidase                                                  | E        | METABOLISM                         |           | 1.27         | 0.199   | Up         |
| argJ                        | bifunctional ornithine acetyltransferase/N-acetylglutamate | E        | METABOLISM                         | Rv1653    | 1.90         | 0.201   | Up         |
| MSMEG_4036                  | crotonobetaine/carnitine-CoA ligase                        | Q        | METABOLISM                         |           | 1.63         | 0.225   | Up         |
| MSMEG_4515                  | non-ribosomal peptide synthetase                           | Q        | METABOLISM                         | Rv2383c   | 1.19         | 0.247   | Up         |
| MSMEG_2172                  | dicarboxylate-carrier protein                              | P        | METABOLISM                         |           | 1.12         | 0.289   | Up         |
| MSMEG_6440                  | monooxygenase, flavin-binding family protein               | P        | METABOLISM                         | Rv3854c   | 2.12         | 0.322   | Up         |
| MSMEG_3389                  | acetolactate synthase                                      | H        | METABOLISM                         |           | 1.08         | 0.327   | Up         |
| MSMEG_3355                  | hypothetical protein                                       | G        | METABOLISM                         |           | 1.04         | 0.333   | Up         |
| MSMEG_3268                  | ABC transporter permease                                   | G        | METABOLISM                         |           | 1.67         | 0.355   | Up         |
| MSMEG_5577                  | fructokinase                                               | G        | METABOLISM                         |           | 1.16         | 0.362   | Up         |
| MSMEG_1821                  | acyl-CoA dehydrogenase                                     | I        | METABOLISM                         | Rv3274c   | 1.12         | 0.364   | Up         |
| MSMEG_6141                  | N-acyl-D-glutamate amidohydrolase                          | Q        | METABOLISM                         | RV2913C   | 1.93         | 0.427   | Up         |
| MSMEG_3267                  | transporter                                                | G        | METABOLISM                         |           | 1.78         | 0.433   | Up         |
| MSMEG_3198                  | NUDIX family hydrolase                                     | F        | METABOLISM                         | RV1593C   | 1.92         | 0.436   | Up         |
| cysD                        | sulfate adenylyltransferase subunit 2                      | H        | METABOLISM                         | Rv1285    | 1.88         | 0.445   | Up         |
| MSMEG_5576                  | D-mannonate oxidoreductase                                 | G        | METABOLISM                         |           | 1.75         | 0.445   | Up         |
| MSMEG_2323                  | GntR family transcriptional regulator                      | E        | METABOLISM                         |           | 1.68         | 0.479   | Up         |
| MSMEG_4886                  | major facilitator family protein transporter               | G        | METABOLISM                         |           | 1.13         | 0.500   | Up         |
| MSMEG_4325                  | malonyl CoA-ACP transacylase                               | I        | METABOLISM                         | Rv2243    | 1.27         | 0.555   | Up         |
| MSMEG_6069                  | CobW/P47K domain-containing protein                        | R        | POORLY CHARACTERIZED               | RV0106    | 1.72         | 0.009   | Up         |
| MSMEG_6399                  | antigen 85-C                                               | R        | POORLY CHARACTERIZED               |           | 1.47         | 0.078   | Up         |
| MSMEG_3879                  | short chain dehydrogenase                                  | R        | POORLY CHARACTERIZED               | RV2073C   | 1.58         | 0.290   | Up         |
| MSMEG_3607                  | short chain dehydrogenase                                  | R        | POORLY CHARACTERIZED               |           | 1.21         | 0.461   | Up         |
| mhpB                        | 3-(2,3-dihydroxyphenyl)propionate dioxygenase              | S        | POORLY CHARACTERIZED               |           | 1.04         | 0.003   | Up         |
| MSMEG_0992                  | 2-nitropropane dioxygenase                                 | R        | POORLY CHARACTERIZED               | RV1533    | 1.44         | 0.011   | Up         |
| MSMEG_0300                  | amidohydrolase                                             | R        | POORLY CHARACTERIZED               |           | 1.48         | 0.034   | Up         |
| MSMEG_1544                  | PduO protein                                               | R        | POORLY CHARACTERIZED               |           | 1.66         | 0.044   | Up         |
| MSMEG_3464                  | alcohol dehydrogenase                                      | R        | POORLY CHARACTERIZED               |           | 1.07         | 0.094   | Up         |
| MSMEG_4125                  | oxidoreductase, short chain dehydrogenase/reductase        | R        | POORLY CHARACTERIZED               |           | 1.06         | 0.144   | Up         |





|            |                                                             |   |            |         |       |       |      |
|------------|-------------------------------------------------------------|---|------------|---------|-------|-------|------|
| MSMEG_5990 | lipid-transfer protein                                      | I | METABOLISM | Rv3540c | -1.10 | 0.049 | Down |
| MSMEG_5857 | oxidoreductase                                              | I | METABOLISM | RV0770  | -1.12 | 0.051 | Down |
| MSMEG_1292 | FAD binding domain-containing protein                       | C | METABOLISM |         | -1.31 | 0.053 | Down |
| MSMEG_4356 | ABC transporter                                             | P | METABOLISM | Rv3664c | -1.65 | 0.056 | Down |
| MSMEG_2347 | phytoene dehydrogenase                                      | Q | METABOLISM |         | -2.05 | 0.057 | Down |
| MSMEG_2103 | 5,10-methylenetetrahydromethanopterin reductase             | C | METABOLISM |         | -1.07 | 0.059 | Down |
| treS       | trehalose synthase                                          | G | METABOLISM | Rv0126  | -1.22 | 0.060 | Down |
| MSMEG_3314 | transporter                                                 | G | METABOLISM |         | -1.16 | 0.060 | Down |
| MSMEG_6869 | regulatory protein                                          | G | METABOLISM |         | -1.57 | 0.061 | Down |
| cysA       | sulfate ABC transporter ATP-binding protein                 | P | METABOLISM |         | -1.76 | 0.063 | Down |
| MSMEG_5251 | hypothetical protein                                        | P | METABOLISM |         | -1.52 | 0.065 | Down |
| MSMEG_4501 | sodium:dicarboxylate symporter                              | C | METABOLISM |         | -1.03 | 0.065 | Down |
| metX       | homoserine O-acetyltransferase                              | E | METABOLISM |         | -1.05 | 0.072 | Down |
| MSMEG_3007 | succinate-semialdehyde dehydrogenase                        | C | METABOLISM |         | -1.62 | 0.078 | Down |
| MSMEG_6514 | trehalose synthase-fused maltokinase                        | G | METABOLISM | RV0127  | -1.21 | 0.084 | Down |
| MSMEG_6615 | hypothetical protein                                        | Q | METABOLISM |         | -2.06 | 0.085 | Down |
| xfp        | phosphoketolase                                             | G | METABOLISM |         | -1.04 | 0.085 | Down |
| MSMEG_3986 | acetyl-coenzyme A synthetase                                | I | METABOLISM |         | -1.30 | 0.086 | Down |
| MSMEG_4618 | isochorismatase                                             | Q | METABOLISM |         | -1.22 | 0.086 | Down |
| MSMEG_3460 | ferric uptake regulation protein                            | P | METABOLISM |         | -1.23 | 0.087 | Down |
| MSMEG_6727 | amino acid permease                                         | E | METABOLISM |         | -1.84 | 0.089 | Down |
| MSMEG_6740 | 1-aminocyclopropane-1-carboxylate deaminase                 | E | METABOLISM |         | -1.20 | 0.092 | Down |
| MSMEG_1847 | 4Fe-4S ferredoxin                                           | C | METABOLISM |         | -1.57 | 0.094 | Down |
| ehuD       | ectoine/hydroxyectoine ABC transporter permease EhuD        | E | METABOLISM |         | -1.29 | 0.101 | Down |
| MSMEG_0782 | class III aminotransferase                                  | E | METABOLISM |         | -1.11 | 0.102 | Down |
| MSMEG_5153 | hypothetical protein                                        | I | METABOLISM | RV1157C | -2.09 | 0.103 | Down |
| MSMEG_0375 | phospholipase D                                             | I | METABOLISM |         | -2.28 | 0.104 | Down |
| glgB       | glycogen branching protein                                  | G | METABOLISM | Rv1326c | -1.34 | 0.106 | Down |
| MSMEG_1296 | uricase                                                     | Q | METABOLISM |         | -2.50 | 0.106 | Down |
| MSMEG_0637 | iron-sulfur binding oxidoreductase                          | E | METABOLISM |         | -2.53 | 0.107 | Down |
| MSMEG_1980 | hypothetical protein                                        | C | METABOLISM | RV0575C | -1.54 | 0.109 | Down |
| MSMEG_4916 | alpha-amylase                                               | G | METABOLISM | Rv1327c | -1.49 | 0.114 | Down |
| MSMEG_0210 | LprO protein                                                | G | METABOLISM | Rv0179c | -1.66 | 0.116 | Down |
| nadE       | NAD synthetase                                              | H | METABOLISM | Rv2438c | -1.36 | 0.118 | Down |
| MSMEG_2925 | permease membrane component                                 | E | METABOLISM |         | -1.14 | 0.119 | Down |
| MSMEG_3536 | sugar transporter                                           | G | METABOLISM |         | -1.41 | 0.125 | Down |
| MSMEG_3304 | succinate semialdehyde dehydrogenase                        | C | METABOLISM |         | -2.15 | 0.127 | Down |
| MSMEG_1886 | Fatty acid desaturase                                       | I | METABOLISM | Rv3229c | -1.74 | 0.128 | Down |
| MSMEG_0684 | aldehyde oxidase                                            | C | METABOLISM |         | -2.07 | 0.129 | Down |
| MSMEG_0686 | oxidoreductase                                              | C | METABOLISM |         | -2.26 | 0.129 | Down |
| MSMEG_0432 | bifunctional uroporphyrinogen-III synthetase/response reg   | H | METABOLISM | RV0260C | -1.16 | 0.130 | Down |
| MSMEG_3005 | 3-hydroxyacyl-CoA dehydrogenase                             | I | METABOLISM |         | -1.59 | 0.130 | Down |
| MSMEG_2346 | phytoene synthase                                           | I | METABOLISM |         | -1.66 | 0.132 | Down |
| MSMEG_0816 | flavin-binding monooxygenase                                | P | METABOLISM | RV1393C | -1.12 | 0.134 | Down |
| MSMEG_6671 | sulfate/thiosulfate import ATP-binding protein CysA         | E | METABOLISM |         | -1.12 | 0.137 | Down |
| MSMEG_5473 | transporter                                                 | E | METABOLISM | Rv0522  | -1.45 | 0.137 | Down |
| MSMEG_6664 | methylenetetrahydrofolate reductase                         | E | METABOLISM |         | -1.77 | 0.139 | Down |
| MSMEG_3618 | hypothetical protein                                        | I | METABOLISM | Rv1860  | -1.02 | 0.141 | Down |
| MSMEG_1742 | oxidoreductase                                              | C | METABOLISM |         | -2.26 | 0.144 | Down |
| malQ       | 4-alpha-glucanotransferase                                  | G | METABOLISM | Rv1781c | -2.05 | 0.148 | Down |
| MSMEG_1794 | dehydrogenase                                               | C | METABOLISM |         | -2.21 | 0.148 | Down |
| MSMEG_6769 | transporter monovalent cation:proton antiporter-2 (CPA2)    | P | METABOLISM |         | -2.81 | 0.148 | Down |
| MSMEG_6768 | halogenase                                                  | C | METABOLISM |         | -2.44 | 0.150 | Down |
| MSMEG_2855 | virulence factor Mce family protein                         | Q | METABOLISM |         | -1.62 | 0.154 | Down |
| MSMEG_4003 | hypothetical protein                                        | E | METABOLISM |         | -1.43 | 0.159 | Down |
| MSMEG_1062 | O-succinylbenzoic acid-CoA ligase                           | Q | METABOLISM | Rv0542c | -1.45 | 0.159 | Down |
| katA       | catalase KatA                                               | P | METABOLISM |         | -2.17 | 0.165 | Down |
| fni        | isopentenyl pyrophosphate isomerase                         | C | METABOLISM |         | -2.07 | 0.165 | Down |
| MSMEG_2289 | cytochrome p450                                             | Q | METABOLISM | Rv3059  | -1.34 | 0.169 | Down |
| MSMEG_6663 | C5-O-methyltransferase                                      | H | METABOLISM |         | -1.51 | 0.170 | Down |
| MSMEG_5826 | pyruvate decarboxylase                                      | H | METABOLISM |         | -2.05 | 0.173 | Down |
| MSMEG_3999 | ABC transporter periplasmic protein                         | G | METABOLISM |         | -1.21 | 0.174 | Down |
| MSMEG_5463 | 6-phosphogluconate dehydrogenase                            | I | METABOLISM |         | -1.58 | 0.175 | Down |
| MSMEG_5799 | nucleoside-diphosphate-sugar epimerase                      | G | METABOLISM |         | -1.35 | 0.179 | Down |
| MSMEG_2728 | glutamate transport ATP-binding protein GluA                | E | METABOLISM |         | -1.12 | 0.181 | Down |
| MSMEG_2122 | dihydroxyacetone kinase subunit DhaL                        | G | METABOLISM |         | -1.03 | 0.182 | Down |
| MSMEG_2112 | hypothetical protein                                        | E | METABOLISM |         | -1.87 | 0.183 | Down |
| MSMEG_5358 | acetamidase/formamidase                                     | C | METABOLISM |         | -1.30 | 0.184 | Down |
| MSMEG_5877 | hypothetical protein                                        | G | METABOLISM | RV3096  | -1.02 | 0.192 | Down |
| MSMEG_2035 | amine oxidase                                               | E | METABOLISM | Rv3170  | -1.28 | 0.197 | Down |
| MSMEG_6213 | manganese containing catalase                               | P | METABOLISM |         | -2.07 | 0.200 | Down |
| aspA       | aspartate ammonia-lyase                                     | E | METABOLISM |         | -1.88 | 0.202 | Down |
| MSMEG_1019 | ribonucleotide-diphosphate reductase subunit alpha          | F | METABOLISM | Rv3051c | -1.22 | 0.211 | Down |
| MSMEG_1989 | phenoxybenzoate dioxygenase subunit beta                    | C | METABOLISM |         | -1.53 | 0.212 | Down |
| MSMEG_5605 | cytochrome bd ubiquinol oxidase subunit I                   | C | METABOLISM |         | -1.21 | 0.216 | Down |
| MSMEG_0264 | transmembrane transporter                                   | G | METABOLISM |         | -1.39 | 0.220 | Down |
| MSMEG_0764 | Na <sup>+</sup> /H <sup>+</sup> antiporter                  | P | METABOLISM |         | -1.49 | 0.221 | Down |
| MSMEG_5189 | oxidoreductase                                              | G | METABOLISM |         | -1.03 | 0.223 | Down |
| MSMEG_5559 | metabolite/sugar transporter                                | G | METABOLISM | Rv3331  | -2.55 | 0.225 | Down |
| MSMEG_6582 | pyridine nucleotide-disulfide oxidoreductase domain-cont    | C | METABOLISM |         | -1.21 | 0.227 | Down |
| MSMEG_1112 | aconitate hydratase                                         | C | METABOLISM |         | -1.82 | 0.232 | Down |
| MSMEG_2205 | acyl-CoA dehydrogenase                                      | I | METABOLISM |         | -1.20 | 0.234 | Down |
| MSMEG_5400 | dehydrogenase                                               | Q | METABOLISM |         | -2.75 | 0.244 | Down |
| MSMEG_4000 | ABC transporter ATP-binding protein                         | G | METABOLISM |         | -1.09 | 0.249 | Down |
| MSMEG_3992 | integral membrane transporter                               | G | METABOLISM |         | -1.04 | 0.255 | Down |
| MSMEG_4318 | hypothetical protein                                        | P | METABOLISM |         | -1.72 | 0.256 | Down |
| MSMEG_1695 | phosphoglucomutase/phosphomannomutase                       | G | METABOLISM | Rv3308  | -1.17 | 0.263 | Down |
| MSMEG_0206 | acyltransferase                                             | I | METABOLISM |         | -1.09 | 0.264 | Down |
| MSMEG_1885 | 2Fe-2S iron-sulfur cluster binding domain-containing protei | C | METABOLISM | RV3230C | -2.06 | 0.265 | Down |
| MSMEG_5908 | acyl-CoA synthetase                                         | Q | METABOLISM | Rv3506  | -1.23 | 0.272 | Down |
| catA       | catechol 1,2-dioxygenase                                    | Q | METABOLISM |         | -1.05 | 0.274 | Down |
| MSMEG_2470 | acyl-CoA thioesterase                                       | I | METABOLISM |         | -1.13 | 0.279 | Down |
| MSMEG_0266 | arginine decarboxylase                                      | E | METABOLISM | RV2531C | -1.43 | 0.284 | Down |
| MSMEG_4379 | isochorismatase hydrolase                                   | Q | METABOLISM |         | -1.39 | 0.287 | Down |
| MSMEG_0614 | methyltransferase                                           | Q | METABOLISM | RV0281  | -1.30 | 0.298 | Down |
| MSMEG_1477 | major facilitator superfamily protein                       | G | METABOLISM |         | -1.57 | 0.302 | Down |
| MSMEG_1682 | flavin-containing monooxygenase FMO                         | P | METABOLISM |         | -1.26 | 0.307 | Down |
| treZ       | malto-oligosyltrehalose trehalohydrolase                    | G | METABOLISM | Rv1562c | -1.09 | 0.319 | Down |
| glgX       | glycogen debranching protein GlgX                           | G | METABOLISM |         | -1.07 | 0.333 | Down |
| MSMEG_1986 | tartrate dehydrogenase                                      | E | METABOLISM |         | -1.08 | 0.349 | Down |
| MSMEG_3930 | [NiFe] hydrogenase subunit gamma                            | C | METABOLISM |         | -1.09 | 0.367 | Down |
| MSMEG_4038 | vanillin dehydrogenase                                      | C | METABOLISM |         | -1.09 | 0.376 | Down |
| cysW       | sulfate ABC transporter permease CysW                       | P | METABOLISM | Rv2398c | -1.64 | 0.397 | Down |
| MSMEG_2037 | hypothetical protein                                        | C | METABOLISM |         | -1.18 | 0.398 | Down |

|            |                                                          |   |                      |         |       |       |      |
|------------|----------------------------------------------------------|---|----------------------|---------|-------|-------|------|
| MSMEG_3954 | trehalose 6-phosphate phosphorylase                      | G | METABOLISM           |         | -1.05 | 0.461 | Down |
| MSMEG_3689 | sodium:solute symporter                                  | R | POORLY CHARACTERIZED |         | -1.22 | 0.005 | Down |
| MSMEG_6151 | alpha/beta hydrolase                                     | R | POORLY CHARACTERIZED | RV1190  | -1.72 | 0.007 | Down |
| MSMEG_4295 | alpha/beta hydrolase                                     | R | POORLY CHARACTERIZED | RV2223C | -1.08 | 0.009 | Down |
| MSMEG_0674 | Erk/YbiS/YcfS/YnhG family protein                        | S | POORLY CHARACTERIZED | RV1433  | -1.46 | 0.011 | Down |
| MSMEG_6542 | B12-binding domain-containing protein                    | R | POORLY CHARACTERIZED |         | -2.14 | 0.013 | Down |
| MSMEG_6116 | OHCU decarboxylase                                       | S | POORLY CHARACTERIZED |         | -1.05 | 0.015 | Down |
| MSMEG_5616 | glyoxalase/bleomycin resistance protein/dioxygenase      | R | POORLY CHARACTERIZED | RV0911  | -1.58 | 0.016 | Down |
| MSMEG_1768 | hypothetical protein                                     | R | POORLY CHARACTERIZED | RV0925C | -1.91 | 0.030 | Down |
| MSMEG_1908 | benzoate 1,2-dioxygenase subunit alpha                   | R | POORLY CHARACTERIZED |         | -1.48 | 0.032 | Down |
| MSMEG_3290 | regulatory protein                                       | R | POORLY CHARACTERIZED |         | -1.24 | 0.044 | Down |
| MSMEG_3581 | FabG protein                                             | R | POORLY CHARACTERIZED |         | -1.55 | 0.045 | Down |
| MSMEG_3593 | hypothetical protein                                     | S | POORLY CHARACTERIZED |         | -2.68 | 0.050 | Down |
| mraZ       | cell division protein MraZ                               | S | POORLY CHARACTERIZED |         | -1.36 | 0.054 | Down |
| MSMEG_3615 | zinc-binding alcohol dehydrogenase                       | R | POORLY CHARACTERIZED | Rv1862  | -1.26 | 0.063 | Down |
| MSMEG_4570 | hypothetical protein                                     | S | POORLY CHARACTERIZED | RV2411C | -1.10 | 0.067 | Down |
| MSMEG_5237 | hypothetical protein                                     | R | POORLY CHARACTERIZED | RV1101C | -1.84 | 0.069 | Down |
| MSMEG_0536 | intracellular protease PfpI family protein               | R | POORLY CHARACTERIZED |         | -1.23 | 0.072 | Down |
| MSMEG_1806 | hypothetical protein                                     | R | POORLY CHARACTERIZED | RV0345  | -1.29 | 0.076 | Down |
| MSMEG_3312 | hemerythrin HHE cation binding domain-containing protein | S | POORLY CHARACTERIZED |         | -2.01 | 0.082 | Down |
| MSMEG_0249 | integral membrane protein                                | R | POORLY CHARACTERIZED | RV0205  | -1.54 | 0.082 | Down |
| MSMEG_1772 | hypothetical protein                                     | S | POORLY CHARACTERIZED |         | -1.98 | 0.083 | Down |
| MSMEG_3289 | gp61 protein                                             | R | POORLY CHARACTERIZED |         | -3.25 | 0.085 | Down |
| MSMEG_3459 | hypothetical protein                                     | S | POORLY CHARACTERIZED | RV3737  | -1.09 | 0.093 | Down |
| MSMEG_0600 | dehydrogenase                                            | R | POORLY CHARACTERIZED |         | -1.87 | 0.097 | Down |
| MSMEG_4743 | hypothetical protein                                     | S | POORLY CHARACTERIZED |         | -1.27 | 0.099 | Down |
| MSMEG_6233 | hypothetical protein                                     | R | POORLY CHARACTERIZED |         | -1.83 | 0.107 | Down |
| MSMEG_1932 | MmpS3 protein                                            | S | POORLY CHARACTERIZED | RV3209  | -1.75 | 0.110 | Down |
| MSMEG_1295 | transthyretin                                            | R | POORLY CHARACTERIZED |         | -2.01 | 0.111 | Down |
| MSMEG_5218 | hypothetical protein                                     | R | POORLY CHARACTERIZED |         | -1.66 | 0.112 | Down |
| MSMEG_1910 | muconate cycloisomerase                                  | R | POORLY CHARACTERIZED |         | -1.55 | 0.115 | Down |
| MSMEG_5590 | carboxylate-amine ligase                                 | S | POORLY CHARACTERIZED |         | -2.56 | 0.119 | Down |
| MSMEG_0671 | S-(hydroxymethyl)glutathione dehydrogenase               | R | POORLY CHARACTERIZED | RV1895  | -1.85 | 0.122 | Down |
| MSMEG_3254 | RDD family protein                                       | S | POORLY CHARACTERIZED |         | -2.27 | 0.125 | Down |
| MSMEG_6667 | hypothetical protein                                     | S | POORLY CHARACTERIZED |         | -2.99 | 0.125 | Down |
| MSMEG_3288 | LysM domain-containing protein                           | S | POORLY CHARACTERIZED |         | -2.92 | 0.126 | Down |
| MSMEG_4247 | integral membrane protein                                | S | POORLY CHARACTERIZED | RV2181  | -1.48 | 0.127 | Down |
| MSMEG_5644 | membrane protein                                         | S | POORLY CHARACTERIZED | RV0180C | -1.38 | 0.127 | Down |
| MSMEG_5961 | glycosyl transferase family protein                      | R | POORLY CHARACTERIZED |         | -1.41 | 0.131 | Down |
| MSMEG_6354 | serine esterase, cutinase                                | R | POORLY CHARACTERIZED |         | -2.52 | 0.131 | Down |
| MSMEG_4063 | amidohydrolase                                           | R | POORLY CHARACTERIZED |         | -1.60 | 0.132 | Down |
| MSMEG_1001 | acetyltransferase, gnat family protein                   | R | POORLY CHARACTERIZED |         | -1.49 | 0.132 | Down |
| MSMEG_3255 | DoxX subfamily protein                                   | S | POORLY CHARACTERIZED |         | -2.05 | 0.133 | Down |
| MSMEG_4707 | non-heme bromoperoxidase BPO-A2                          | R | POORLY CHARACTERIZED |         | -1.71 | 0.133 | Down |
| MSMEG_1782 | oxidoreductase, short chain dehydrogenase/reductase      | R | POORLY CHARACTERIZED |         | -2.43 | 0.134 | Down |
| MSMEG_0066 | early secretory antigenic target, 6 kDa                  | S | POORLY CHARACTERIZED | Rv3875  | -1.58 | 0.135 | Down |
| MSMEG_5402 | dehydrogenase DhgA                                       | R | POORLY CHARACTERIZED |         | -2.11 | 0.136 | Down |
| MSMEG_5981 | glycosyl transferase family protein                      | S | POORLY CHARACTERIZED |         | -1.52 | 0.148 | Down |
| MSMEG_6569 | hypothetical protein                                     | S | POORLY CHARACTERIZED |         | -1.01 | 0.149 | Down |
| MSMEG_0763 | antibiotic transporter                                   | R | POORLY CHARACTERIZED |         | -1.81 | 0.151 | Down |
| MSMEG_2808 | short-chain dehydrogenase/reductase SDR                  | R | POORLY CHARACTERIZED |         | -1.04 | 0.156 | Down |
| MSMEG_3019 | hypothetical protein                                     | S | POORLY CHARACTERIZED | RV2568C | -1.36 | 0.159 | Down |
| MSMEG_0382 | transporter                                              | R | POORLY CHARACTERIZED | Rv0450c | -1.38 | 0.162 | Down |
| MSMEG_3580 | antigen 85-C                                             | R | POORLY CHARACTERIZED | Rv0129c | -1.65 | 0.166 | Down |
| MSMEG_0697 | integral membrane protein                                | S | POORLY CHARACTERIZED |         | -2.37 | 0.167 | Down |
| MSMEG_2914 | L-idonate 5-dehydrogenase                                | R | POORLY CHARACTERIZED |         | -1.21 | 0.168 | Down |
| MSMEG_6616 | S-(hydroxymethyl)glutathione dehydrogenase               | R | POORLY CHARACTERIZED |         | -1.11 | 0.168 | Down |
| MSMEG_3287 | alpha/beta hydrolase                                     | R | POORLY CHARACTERIZED |         | -1.52 | 0.169 | Down |
| MSMEG_3374 | hypothetical protein                                     | S | POORLY CHARACTERIZED |         | -1.16 | 0.182 | Down |
| wrbA       | NAD(P)H:quinone oxidoreductase, type IV                  | R | POORLY CHARACTERIZED |         | -2.15 | 0.185 | Down |
| MSMEG_2837 | nitrate reductase NarB                                   | R | POORLY CHARACTERIZED |         | -1.32 | 0.192 | Down |
| MSMEG_6583 | antigen 85-C                                             | R | POORLY CHARACTERIZED |         | -1.17 | 0.193 | Down |
| MSMEG_3420 | gluconate 5-dehydrogenase                                | R | POORLY CHARACTERIZED |         | -1.17 | 0.195 | Down |
| MSMEG_1299 | oxidoreductase, 2OG-Fe(II) oxygenase                     | R | POORLY CHARACTERIZED |         | -1.18 | 0.197 | Down |
| MSMEG_3022 | transglycosylase associated protein                      | S | POORLY CHARACTERIZED |         | -1.64 | 0.204 | Down |
| MSMEG_6610 | hypothetical protein                                     | R | POORLY CHARACTERIZED |         | -2.00 | 0.210 | Down |
| MSMEG_3309 | tryptophan synthase subunit beta                         | R | POORLY CHARACTERIZED |         | -1.42 | 0.222 | Down |
| MSMEG_3083 | nucleoside-diphosphate sugar epimerase                   | R | POORLY CHARACTERIZED |         | -1.39 | 0.236 | Down |
| trmB       | tRNA (guanine-N(7)-methyltransferase                     | R | POORLY CHARACTERIZED |         | -1.11 | 0.260 | Down |
| MSMEG_1679 | AmiB protein                                             | R | POORLY CHARACTERIZED |         | -1.77 | 0.286 | Down |
| MSMEG_5027 | glyoxalase                                               | S | POORLY CHARACTERIZED |         | -1.11 | 0.289 | Down |
| MSMEG_5179 | DoxX subfamily protein                                   | S | POORLY CHARACTERIZED |         | -1.16 | 0.308 | Down |
| MSMEG_2913 | hydrolase                                                | R | POORLY CHARACTERIZED |         | -1.46 | 0.329 | Down |
| MSMEG_1379 | hypothetical protein                                     | R | POORLY CHARACTERIZED |         | -1.13 | 0.331 | Down |
| MSMEG_2157 | hypothetical protein                                     | S | POORLY CHARACTERIZED |         | -1.81 | 0.335 | Down |
| MSMEG_1680 | hypothetical protein                                     | S | POORLY CHARACTERIZED |         | -1.21 | 0.339 | Down |

| LIX80 t24-1 vs. LIX70 t24-1 |                                         |          |                                    |           |              |         |            |
|-----------------------------|-----------------------------------------|----------|------------------------------------|-----------|--------------|---------|------------|
| GeneName                    | Product                                 | COG_Code | Function                           | RV Number | Geomean_Fold | P-value | Regulation |
| sufB                        | FeS assembly protein SufB               | O        | CELLULAR PROCESSES AND SIGNALING   | RV1461    | 2.34         | 0.262   | Up         |
| ftsZ                        | cell division protein FtsZ              | D        | CELLULAR PROCESSES AND SIGNALING   | Rv2150c   | 1.07         | 0.003   | Up         |
| MSMEG_4253                  | glycoside hydrolase family protein      | M        | CELLULAR PROCESSES AND SIGNALING   | Rv0557    | 1.04         | 0.003   | Up         |
| dnak                        | molecular chaperone DnaK                | O        | CELLULAR PROCESSES AND SIGNALING   | Rv0350    | 1.02         | 0.034   | Up         |
| MSMEG_3162                  | beta-lactamase                          | V        | CELLULAR PROCESSES AND SIGNALING   | Rv1497    | 1.11         | 0.212   | Up         |
| groEL                       | molecular chaperone GroEL               | O        | CELLULAR PROCESSES AND SIGNALING   |           | 1.56         | 0.252   | Up         |
| MSMEG_4309                  | low molecular weight protein-tyrosin    | T        | CELLULAR PROCESSES AND SIGNALING   | Rv2234    | 1.00         | 0.269   | Up         |
| MSMEG_5611                  | spore pressor                           | O        | CELLULAR PROCESSES AND SIGNALING   |           | 1.21         | 0.292   | Up         |
| lexA                        | LexA repressor                          | T        | CELLULAR PROCESSES AND SIGNALING   | Rv2720    | 1.34         | 0.318   | Up         |
| groES                       | co-chaperonin GroES                     | O        | CELLULAR PROCESSES AND SIGNALING   |           | 1.46         | 0.333   | Up         |
| MSMEG_5733                  | universal stress protein family protein | T        | CELLULAR PROCESSES AND SIGNALING   |           | 1.09         | 0.359   | Up         |
| MSMEG_5372                  | sensor protein KdpD                     | T        | CELLULAR PROCESSES AND SIGNALING   | Rv1028c   | 1.10         | 0.535   | Up         |
| MSMEG_0787                  | extracellular solute-binding protein    | T        | CELLULAR PROCESSES AND SIGNALING   | Rv0411c   | 1.08         | 0.573   | Up         |
| MSMEG_4154                  | transposase, Mutator family protein     | L        | INFORMATION STORAGE AND PROCESSING | RV3431C   | 3.17         | 0.010   | Up         |
| MSMEG_3121                  | DNA-binding protein                     | K        | INFORMATION STORAGE AND PROCESSING | RV1460    | 2.95         | 0.175   | Up         |
| MSMEG_3959                  | transcriptional regulator               | K        | INFORMATION STORAGE AND PROCESSING |           | 2.79         | 0.240   | Up         |
| MSMEG_5229                  | hypothetical protein                    | J        | INFORMATION STORAGE AND PROCESSING |           | 1.09         | 0.244   | Up         |
| MSMEG_6441                  | TetR family transcriptional regulator   | K        | INFORMATION STORAGE AND PROCESSING | Rv3855    | 3.23         | 0.253   | Up         |
| MSMEG_4492                  | amidase                                 | J        | INFORMATION STORAGE AND PROCESSING | Rv2363    | 1.14         | 0.330   | Up         |
| MSMEG_3960                  | transcriptional regulator               | K        | INFORMATION STORAGE AND PROCESSING |           | 1.43         | 0.331   | Up         |
| MSMEG_6139                  | HTH-type transcriptional regulator      | K        | INFORMATION STORAGE AND PROCESSING | RV2912C   | 1.19         | 0.387   | Up         |
| MSMEG_2794                  | GntR family transcriptional regulator   | K        | INFORMATION STORAGE AND PROCESSING |           | 1.68         | 0.417   | Up         |
| MSMEG_2989                  | LacI family transcriptional regulator   | K        | INFORMATION STORAGE AND PROCESSING |           | 1.67         | 0.430   | Up         |
| dinP                        | DNA polymerase IV                       | L        | INFORMATION STORAGE AND PROCESSING |           | 1.52         | 0.453   | Up         |
| MSMEG_0471                  | LysR family transcriptional regulator   | K        | INFORMATION STORAGE AND PROCESSING |           | 1.08         | 0.012   | Up         |
| MSMEG_4622                  | TetR family transcriptional regulator   | K        | INFORMATION STORAGE AND PROCESSING |           | 1.09         | 0.125   | Up         |
| MSMEG_6077                  | CarD family transcriptional regulator   | K        | INFORMATION STORAGE AND PROCESSING | RV3583C   | 1.37         | 0.159   | Up         |
| MSMEG_2030                  | TetR family transcriptional regulator   | K        | INFORMATION STORAGE AND PROCESSING |           | 1.37         | 0.168   | Up         |
| ruvC                        | Holliday junction resolvase             | L        | INFORMATION STORAGE AND PROCESSING | Rv2594c   | 1.43         | 0.176   | Up         |
| MSMEG_6009                  | TetR family transcriptional regulator   | K        | INFORMATION STORAGE AND PROCESSING | RV3557C   | 1.88         | 0.198   | Up         |
| MSMEG_2606                  | ArsR family transcriptional regulator   | K        | INFORMATION STORAGE AND PROCESSING |           | 1.58         | 0.210   | Up         |
| ruvA                        | Holliday junction DNA helicase RuvA     | L        | INFORMATION STORAGE AND PROCESSING | Rv2593c   | 1.57         | 0.221   | Up         |
| MSMEG_5669                  | ISMsmZ, transposase                     | L        | INFORMATION STORAGE AND PROCESSING |           | 1.13         | 0.246   | Up         |
| MSMEG_0296                  | MarR family transcriptional regulator   | K        | INFORMATION STORAGE AND PROCESSING |           | 1.21         | 0.258   | Up         |
| MSMEG_6731                  | transcriptional regulatory protein      | K        | INFORMATION STORAGE AND PROCESSING |           | 1.16         | 0.403   | Up         |
| MSMEG_5563                  | AraC family transcriptional regulator   | K        | INFORMATION STORAGE AND PROCESSING |           | 1.28         | 0.419   | Up         |
| MSMEG_6223                  | TetR family transcriptional regulator   | K        | INFORMATION STORAGE AND PROCESSING |           | 1.01         | 0.423   | Up         |
| MSMEG_5995                  | P450 heme-thiolate protein              | Q        | METABOLISM                         | Rv3545c   | 1.10         | 0.072   | Up         |
| MSMEG_3389                  | acetolactate synthase                   | H        | METABOLISM                         |           | 1.06         | 0.084   | Up         |
| MSMEG_2323                  | GntR family transcriptional regulator   | E        | METABOLISM                         |           | 2.38         | 0.230   | Up         |
| MSMEG_3198                  | NUDIX family hydrolase                  | F        | METABOLISM                         | RV1593C   | 2.23         | 0.232   | Up         |
| MSMEG_1821                  | acyl-CoA dehydrogenase                  | I        | METABOLISM                         | Rv3274c   | 1.22         | 0.304   | Up         |
| MSMEG_4325                  | malonyl CoA-ACP transacylase            | I        | METABOLISM                         | Rv2243    | 2.01         | 0.321   | Up         |
| MSMEG_3269                  | sugar ABC transporter ATP-binding pr    | G        | METABOLISM                         |           | 1.30         | 0.322   | Up         |
| MSMEG_3267                  | transporter                             | G        | METABOLISM                         |           | 1.24         | 0.327   | Up         |
| MSMEG_6225                  | proton antiporter efflux pump           | G        | METABOLISM                         |           | 1.79         | 0.346   | Up         |
| MSMEG_6141                  | N-acyl-D-glutamate amidohydrolase       | Q        | METABOLISM                         | RV2913C   | 1.47         | 0.389   | Up         |
| MSMEG_5576                  | D-mannosate oxidoreductase              | G        | METABOLISM                         |           | 1.17         | 0.459   | Up         |
| MSMEG_6440                  | monooxygenase, flavin-binding family    | P        | METABOLISM                         | Rv3854c   | 1.55         | 0.461   | Up         |
| cysD                        | sulfate adenyltransferase subunit 2     | H        | METABOLISM                         | RV1285    | 1.54         | 0.621   | Up         |
| MSMEG_6867                  | oligopeptide ABC transporter integra    | P        | METABOLISM                         | Rv3664c   | 1.41         | 0.002   | Up         |
| MSMEG_4646                  | pyruvate synthase                       | C        | METABOLISM                         | RV2455C   | 1.01         | 0.003   | Up         |
| MSMEG_6330                  | prephenate dehydrogenase                | E        | METABOLISM                         | Rv3754    | 1.11         | 0.046   | Up         |
| MSMEG_4757                  | fatty acid synthase                     | I        | METABOLISM                         | RV2524c   | 1.50         | 0.115   | Up         |
| ald                         | alanine dehydrogenase                   | E        | METABOLISM                         | Rv2780    | 1.15         | 0.126   | Up         |
| MSMEG_4386                  | ABC transporter permease                | P        | METABOLISM                         |           | 1.55         | 0.170   | Up         |
| MSMEG_5491                  | acyl-CoA dehydrogenase                  | I        | METABOLISM                         | Rv0975c   | 1.01         | 0.176   | Up         |
| MSMEG_3583                  | monooxygenase                           | C        | METABOLISM                         |           | 1.14         | 0.205   | Up         |
| thyA                        | thymidylate synthase                    | F        | METABOLISM                         | Rv2764c   | 1.13         | 0.236   | Up         |
| MSMEG_2242                  | coniferyl aldehyde dehydrogenase        | C        | METABOLISM                         | RV0147    | 1.18         | 0.258   | Up         |
| pyrB                        | aspartate carbamoyltransferase          | F        | METABOLISM                         | Rv1380    | 1.07         | 0.258   | Up         |
| MSMEG_1511                  | oxidoreductase                          | C        | METABOLISM                         |           | 1.20         | 0.311   | Up         |
| MSMEG_1129                  | D-amino-acid dehydrogenase              | E        | METABOLISM                         |           | 1.56         | 0.315   | Up         |
| MSMEG_3270                  | sn-glycerol-3-phosphate ABC transpo     | G        | METABOLISM                         |           | 1.07         | 0.360   | Up         |
| MSMEG_5732                  | monooxygenase                           | C        | METABOLISM                         |           | 1.28         | 0.400   | Up         |
| MSMEG_4525                  | coproporphyrinogen III oxidase          | H        | METABOLISM                         | RV2388c   | 1.04         | 0.425   | Up         |
| MSMEG_5572                  | sugar ABC transporter permease          | G        | METABOLISM                         |           | 1.05         | 0.488   | Up         |
| MSMEG_4151                  | hypothetical protein                    | C        | METABOLISM                         |           | 1.02         | 0.503   | Up         |
| MSMEG_0305                  | acyltransferase domain-containing pr    | I        | METABOLISM                         | RV1428C   | 1.00         | 0.547   | Up         |
| MSMEG_0992                  | 2-nitropropane dioxygenase              | R        | POORLY CHARACTERIZED               | RV1533    | 2.05         | 0.057   | Up         |
| MSMEG_2755                  | hypothetical protein                    | S        | POORLY CHARACTERIZED               | RV2707    | 1.45         | 0.408   | Up         |
| MSMEG_5565                  | hypothetical protein                    | S        | POORLY CHARACTERIZED               |           | 2.57         | 0.437   | Up         |
| MSMEG_3265                  | arabitol-phosphate dehydrogenase        | R        | POORLY CHARACTERIZED               |           | 1.03         | 0.474   | Up         |
| MSMEG_5329                  | hypothetical protein                    | S        | POORLY CHARACTERIZED               | RV3848    | 1.43         | 0.144   | Up         |
| MSMEG_6672                  | type I phosphodiesterase / nucleotid    | R        | POORLY CHARACTERIZED               |           | 1.20         | 0.156   | Up         |
| murQ                        | N-acetylmuramic acid 6-phosphate et     | R        | POORLY CHARACTERIZED               |           | 1.30         | 0.167   | Up         |
| MSMEG_6722                  | hypothetical protein                    | S        | POORLY CHARACTERIZED               | RV2237    | 1.16         | 0.188   | Up         |
| MSMEG_6742                  | hypothetical protein                    | R        | POORLY CHARACTERIZED               |           | 1.62         | 0.206   | Up         |
| MSMEG_0530                  | short chain dehydrogenase               | R        | POORLY CHARACTERIZED               |           | 1.07         | 0.273   | Up         |
| MSMEG_5816                  | hypothetical protein                    | S        | POORLY CHARACTERIZED               |           | 1.54         | 0.317   | Up         |
| MSMEG_1278                  | death-on-curing protein                 | R        | POORLY CHARACTERIZED               |           | 1.94         | 0.328   | Up         |
| MSMEG_4029                  | hypothetical protein                    | R        | POORLY CHARACTERIZED               |           | 1.15         | 0.340   | Up         |
| MSMEG_1045                  | integral membrane protein               | S        | POORLY CHARACTERIZED               |           | 1.41         | 0.355   | Up         |



|            |                                         |   |                      |         |       |       |      |
|------------|-----------------------------------------|---|----------------------|---------|-------|-------|------|
| MSMEG_0375 | phospholipase D                         | I | METABOLISM           |         | -2.51 | 0.125 | Down |
| MSMEG_1296 | uricase                                 | Q | METABOLISM           |         | -2.13 | 0.134 | Down |
| MSMEG_6664 | methylenetetrahydrofolate reductas      | E | METABOLISM           |         | -2.20 | 0.142 | Down |
| MSMEG_0968 | cytochrome P450                         | Q | METABOLISM           |         | -2.53 | 0.143 | Down |
| MSMEG_5799 | nucleoside-diphosphate-sugar epime      | G | METABOLISM           |         | -1.53 | 0.145 | Down |
| MSMEG_3421 | inner membrane metabolite transpor      | G | METABOLISM           |         | -1.33 | 0.149 | Down |
| MSMEG_6213 | manganese containing catalase           | P | METABOLISM           |         | -2.51 | 0.155 | Down |
| MSMEG_1477 | major facilitator superfamily protein   | G | METABOLISM           |         | -2.18 | 0.160 | Down |
| malQ       | 4-alpha-glucanotransferase              | G | METABOLISM           | Rv1781c | -2.29 | 0.161 | Down |
| MSMEG_6615 | hypothetical protein                    | Q | METABOLISM           |         | -2.29 | 0.161 | Down |
| glgX       | glycogen debranching protein GlgX       | G | METABOLISM           |         | -1.81 | 0.165 | Down |
| katA       | catalase KatA                           | P | METABOLISM           |         | -2.43 | 0.166 | Down |
| xfp        | phosphoketolase                         | G | METABOLISM           |         | -1.53 | 0.167 | Down |
| MSMEG_5189 | oxidoreductase                          | G | METABOLISM           |         | -1.39 | 0.168 | Down |
| MSMEG_5358 | acetamidase/formamidase                 | C | METABOLISM           |         | -1.63 | 0.171 | Down |
| MSMEG_2035 | amine oxidase                           | E | METABOLISM           | Rv3170  | -1.48 | 0.172 | Down |
| MSMEG_5400 | dehydrogenase                           | Q | METABOLISM           |         | -3.19 | 0.179 | Down |
| MSMEG_2122 | dihydroxyacetone kinase subunit Dha     | G | METABOLISM           |         | -1.42 | 0.191 | Down |
| MSMEG_4916 | alpha-amylase                           | G | METABOLISM           | Rv1327c | -1.57 | 0.191 | Down |
| MSMEG_1112 | aconitate hydratase                     | C | METABOLISM           |         | -2.37 | 0.197 | Down |
| cysW       | sulfate ABC transporter permease Cys    | P | METABOLISM           | Rv2398c | -2.38 | 0.203 | Down |
| MSMEG_5826 | pyruvate decarboxylase                  | H | METABOLISM           |         | -2.37 | 0.210 | Down |
| MSMEG_0684 | aldehyde oxidase                        | C | METABOLISM           |         | -1.90 | 0.210 | Down |
| MSMEG_0266 | arginine decarboxylase                  | E | METABOLISM           | RV2531C | -1.92 | 0.214 | Down |
| MSMEG_3304 | succinate semialdehyde dehydrogen       | C | METABOLISM           |         | -2.15 | 0.215 | Down |
| MSMEG_0357 | transmembrane transporter               | G | METABOLISM           |         | -2.15 | 0.217 | Down |
| MSMEG_4318 | hypothetical protein                    | P | METABOLISM           |         | -2.08 | 0.218 | Down |
| MSMEG_6740 | 1-aminocyclopropane-1-carboxylate e     | E | METABOLISM           |         | -1.16 | 0.221 | Down |
| MSMEG_4356 | ABC transporter                         | P | METABOLISM           | Rv3664c | -1.78 | 0.229 | Down |
| MSMEG_5605 | cytochrome bd ubiquinol oxidase sub     | C | METABOLISM           |         | -1.38 | 0.251 | Down |
| MSMEG_2037 | hypothetical protein                    | C | METABOLISM           |         | -1.56 | 0.266 | Down |
| MSMEG_0782 | class III aminotransferase              | E | METABOLISM           |         | -1.08 | 0.281 | Down |
| catA       | catechol 1,2-dioxygenase                | Q | METABOLISM           |         | -1.03 | 0.325 | Down |
| MSMEG_0432 | bifunctional uroporphyrinogen-III syn   | H | METABOLISM           | RV0260C | -1.10 | 0.335 | Down |
| MSMEG_1846 | polysulfide reductase NrfD              | P | METABOLISM           |         | -1.39 | 0.346 | Down |
| MSMEG_0614 | methyltransferase                       | Q | METABOLISM           | RV0281  | -1.44 | 0.366 | Down |
| MSMEG_1292 | FAD binding domain-containing prote     | C | METABOLISM           |         | -1.26 | 0.367 | Down |
| MSMEG_1886 | Fatty acid desaturase                   | I | METABOLISM           | Rv3229c | -1.16 | 0.369 | Down |
| MSMEG_1742 | oxidoreductase                          | C | METABOLISM           |         | -1.57 | 0.389 | Down |
| MSMEG_3007 | succinate-semialdehyde dehydrogen       | C | METABOLISM           |         | -1.32 | 0.407 | Down |
| glgC       | glucose-1-phosphate adenyltransfera     | G | METABOLISM           | Rv1213  | -1.30 | 0.000 | Down |
| MSMEG_1432 | acetylcholinesterase                    | I | METABOLISM           |         | -1.28 | 0.002 | Down |
| MSMEG_2926 | glycine betaine/carnitine/choline tra   | E | METABOLISM           |         | -1.14 | 0.020 | Down |
| MSMEG_5341 | dipeptidyl aminopeptidase/acylamin      | I | METABOLISM           |         | -1.08 | 0.041 | Down |
| MSMEG_4034 | NAD dependent epimerase/dehydrat        | G | METABOLISM           |         | -1.25 | 0.043 | Down |
| MSMEG_6230 | acyltransferase                         | I | METABOLISM           |         | -1.59 | 0.048 | Down |
| MSMEG_0604 | glyoxylate reductase                    | E | METABOLISM           |         | -1.00 | 0.051 | Down |
| MSMEG_5504 | hypothetical protein                    | G | METABOLISM           |         | -1.17 | 0.065 | Down |
| MSMEG_3108 | ABC transporter ATPase                  | G | METABOLISM           |         | -1.12 | 0.074 | Down |
| oppC       | ABC transporter permease                | P | METABOLISM           | RV1282C | -1.11 | 0.088 | Down |
| MSMEG_6235 | thiopurine S-methyltransferase (tpmt    | H | METABOLISM           | RV3699  | -1.22 | 0.090 | Down |
| MSMEG_1780 | hypothetical protein                    | P | METABOLISM           |         | -1.11 | 0.091 | Down |
| MSMEG_3273 | glutamyl aminopeptidase, M42 family     | G | METABOLISM           |         | -1.33 | 0.102 | Down |
| MSMEG_4719 | peptidase S9, prolyl oligopeptidase     | E | METABOLISM           |         | -1.20 | 0.105 | Down |
| MSMEG_3444 | choline dehydrogenase                   | E | METABOLISM           |         | -1.46 | 0.115 | Down |
| MSMEG_1361 | alpha-mannosidase                       | G | METABOLISM           | RV0648  | -1.27 | 0.116 | Down |
| MSMEG_0762 | cytochrome P450                         | Q | METABOLISM           |         | -1.19 | 0.116 | Down |
| MSMEG_1132 | FAD binding domain-containing prote     | C | METABOLISM           | RV0561C | -1.33 | 0.126 | Down |
| MSMEG_6471 | glycine/D-amino acid oxidase            | E | METABOLISM           |         | -1.05 | 0.137 | Down |
| MSMEG_1572 | GntR family transcriptional regulator   | E | METABOLISM           |         | -1.29 | 0.141 | Down |
| MSMEG_6312 | cytochrome P450                         | Q | METABOLISM           |         | -1.12 | 0.153 | Down |
| MSMEG_5715 | hypothetical protein                    | C | METABOLISM           |         | -1.16 | 0.161 | Down |
| MSMEG_4708 | methyltransferase                       | H | METABOLISM           | RV0089  | -1.04 | 0.170 | Down |
| MSMEG_6321 | glycerol dehydratase large subunit      | Q | METABOLISM           |         | -1.08 | 0.176 | Down |
| MSMEG_4857 | hypothetical protein                    | C | METABOLISM           |         | -1.05 | 0.181 | Down |
| MSMEG_5592 | hypothetical protein                    | C | METABOLISM           |         | -1.28 | 0.184 | Down |
| MSMEG_2982 | periplasmic binding protein             | E | METABOLISM           |         | -1.45 | 0.193 | Down |
| MSMEG_6735 | amino acid permease                     | E | METABOLISM           |         | -1.26 | 0.223 | Down |
| MSMEG_5163 | glycine/betaine ABC transporter peri    | E | METABOLISM           |         | -1.30 | 0.283 | Down |
| MSMEG_4077 | enoyl-CoA hydratase                     | J | METABOLISM           |         | -1.06 | 0.296 | Down |
| phoU       | phosphate transporter regulatory pro    | P | METABOLISM           |         | -1.05 | 0.302 | Down |
| MSMEG_3620 | hypothetical protein                    | C | METABOLISM           | RV1855C | -1.06 | 0.306 | Down |
| MSMEG_4076 | butyryl-CoA dehydrogenase               | I | METABOLISM           |         | -1.69 | 0.311 | Down |
| sthA       | soluble pyridine nucleotide transhyd    | C | METABOLISM           | Rv2713  | -1.03 | 0.313 | Down |
| MSMEG_0818 | transporter major facilitator family pr | G | METABOLISM           |         | -1.23 | 0.322 | Down |
| MSMEG_1204 | 3-oxoacyl-ACP synthase                  | Q | METABOLISM           |         | -1.07 | 0.361 | Down |
| MSMEG_2208 | acyl-CoA dehydrogenase                  | I | METABOLISM           |         | -1.06 | 0.388 | Down |
| MSMEG_1705 | D-xylose transport ATP-binding prote    | G | METABOLISM           |         | -1.09 | 0.392 | Down |
| MSMEG_5022 | flavin-containing monooxygenase FM      | P | METABOLISM           |         | -1.08 | 0.491 | Down |
| MSMEG_4570 | hypothetical protein                    | S | POORLY CHARACTERIZED | RV2411C | -1.49 | 0.002 | Down |
| MSMEG_6667 | hypothetical protein                    | S | POORLY CHARACTERIZED |         | -3.38 | 0.010 | Down |
| MSMEG_5616 | glyoxalase/bleomycin resistance prot    | R | POORLY CHARACTERIZED | RV0911  | -1.95 | 0.011 | Down |
| MSMEG_3689 | sodium:solute symporter                 | R | POORLY CHARACTERIZED |         | -1.31 | 0.015 | Down |
| MSMEG_5590 | carboxylate-amine ligase                | S | POORLY CHARACTERIZED |         | -2.97 | 0.016 | Down |
| MSMEG_4247 | integral membrane protein               | S | POORLY CHARACTERIZED | RV2181  | -1.84 | 0.017 | Down |
| MSMEG_5218 | hypothetical protein                    | R | POORLY CHARACTERIZED |         | -2.08 | 0.021 | Down |
| MSMEG_0249 | integral membrane protein               | R | POORLY CHARACTERIZED | RV0205  | -1.76 | 0.024 | Down |
| MSMEG_3289 | gp61 protein                            | R | POORLY CHARACTERIZED |         | -3.40 | 0.027 | Down |
| MSMEG_5237 | hypothetical protein                    | R | POORLY CHARACTERIZED | RV1101C | -1.69 | 0.034 | Down |
| MSMEG_1806 | hypothetical protein                    | R | POORLY CHARACTERIZED | RV0345  | -1.63 | 0.035 | Down |
| MSMEG_1295 | transthyretin                           | R | POORLY CHARACTERIZED |         | -1.83 | 0.040 | Down |
| MSMEG_0600 | dehydrogenase                           | R | POORLY CHARACTERIZED |         | -2.32 | 0.042 | Down |
| MSMEG_3255 | DoxX subfamily protein                  | S | POORLY CHARACTERIZED |         | -2.79 | 0.043 | Down |
| MSMEG_3083 | nucleoside-diphosphate sugar epime      | R | POORLY CHARACTERIZED |         | -1.70 | 0.045 | Down |
| MSMEG_0697 | integral membrane protein               | S | POORLY CHARACTERIZED |         | -3.16 | 0.057 | Down |
| MSMEG_3593 | hypothetical protein                    | S | POORLY CHARACTERIZED |         | -3.08 | 0.060 | Down |
| MSMEG_5402 | dehydrogenase DhgA                      | R | POORLY CHARACTERIZED |         | -2.62 | 0.061 | Down |

|            |                                         |   |                      |         |       |       |      |
|------------|-----------------------------------------|---|----------------------|---------|-------|-------|------|
| MSMEG_1768 | hypothetical protein                    | R | POORLY CHARACTERIZED | RV0925C | -2.37 | 0.066 | Down |
| MSMEG_6116 | OHCU decarboxylase                      | S | POORLY CHARACTERIZED |         | -1.74 | 0.071 | Down |
| MSMEG_1782 | oxidoreductase, short chain dehydrog    | R | POORLY CHARACTERIZED |         | -3.08 | 0.071 | Down |
| MSMEG_6542 | B12-binding domain-containing prote     | R | POORLY CHARACTERIZED |         | -1.95 | 0.072 | Down |
| MSMEG_6233 | hypothetical protein                    | R | POORLY CHARACTERIZED |         | -2.15 | 0.072 | Down |
| MSMEG_0671 | S-(hydroxymethyl)glutathione dehyd      | R | POORLY CHARACTERIZED | RV1895  | -2.26 | 0.082 | Down |
| MSMEG_0536 | intracellular protease Pfp1 family prot | R | POORLY CHARACTERIZED |         | -1.63 | 0.095 | Down |
| MSMEG_1001 | acetyltransferase, gnat family protein  | R | POORLY CHARACTERIZED |         | -2.11 | 0.096 | Down |
| MSMEG_3287 | alpha/beta hydrolase                    | R | POORLY CHARACTERIZED |         | -1.44 | 0.097 | Down |
| MSMEG_3022 | transglycosylase associated protein     | S | POORLY CHARACTERIZED |         | -2.46 | 0.099 | Down |
| MSMEG_2837 | nitrate reductase NarB                  | R | POORLY CHARACTERIZED |         | -1.70 | 0.108 | Down |
| MSMEG_1772 | hypothetical protein                    | S | POORLY CHARACTERIZED |         | -2.05 | 0.108 | Down |
| MSMEG_6151 | alpha/beta hydrolase                    | R | POORLY CHARACTERIZED | RV1190  | -2.29 | 0.113 | Down |
| MSMEG_3312 | hemerythrin HHE cation binding dom      | S | POORLY CHARACTERIZED |         | -1.96 | 0.114 | Down |
| MSMEG_0763 | antibiotic transporter                  | R | POORLY CHARACTERIZED |         | -2.24 | 0.116 | Down |
| MSMEG_4707 | non-heme bromoperoxidase BPO-A2         | R | POORLY CHARACTERIZED |         | -1.96 | 0.144 | Down |
| MSMEG_1910 | muconate cycloisomerase                 | R | POORLY CHARACTERIZED |         | -1.55 | 0.145 | Down |
| MSMEG_3420 | gluconate 5-dehydrogenase               | R | POORLY CHARACTERIZED |         | -1.28 | 0.147 | Down |
| MSMEG_6616 | S-(hydroxymethyl)glutathione dehyd      | R | POORLY CHARACTERIZED |         | -1.17 | 0.150 | Down |
| MSMEG_3254 | RDD family protein                      | S | POORLY CHARACTERIZED |         | -2.61 | 0.159 | Down |
| wrbA       | NAD(P)H:quinone oxidoreductase, ty      | R | POORLY CHARACTERIZED |         | -2.65 | 0.169 | Down |
| MSMEG_6354 | serine esterase, cutinase               | R | POORLY CHARACTERIZED |         | -2.88 | 0.178 | Down |
| MSMEG_2808 | short-chain dehydrogenase/reductas      | R | POORLY CHARACTERIZED |         | -1.10 | 0.196 | Down |
| MSMEG_6610 | hypothetical protein                    | R | POORLY CHARACTERIZED |         | -2.25 | 0.238 | Down |
| MSMEG_4743 | hypothetical protein                    | S | POORLY CHARACTERIZED |         | -1.14 | 0.248 | Down |
| MSMEG_3288 | LysM domain-containing protein          | S | POORLY CHARACTERIZED |         | -2.89 | 0.310 | Down |
| MSMEG_2157 | hypothetical protein                    | S | POORLY CHARACTERIZED |         | -2.20 | 0.365 | Down |
| MSMEG_6614 | integral membrane protein               | R | POORLY CHARACTERIZED |         | -1.06 | 0.003 | Down |
| MSMEG_0356 | acetyltransferase                       | R | POORLY CHARACTERIZED |         | -1.08 | 0.024 | Down |
| MSMEG_1817 | transmembrane protein                   | S | POORLY CHARACTERIZED | RV3277  | -1.61 | 0.033 | Down |
| MSMEG_2870 | oxygenase KshA                          | R | POORLY CHARACTERIZED |         | -1.10 | 0.046 | Down |
| MSMEG_1655 | alpha/beta hydrolase                    | R | POORLY CHARACTERIZED |         | -1.47 | 0.048 | Down |
| moxR       | ATPase, MoxR family protein             | R | POORLY CHARACTERIZED | Rv1479  | -1.43 | 0.060 | Down |
| MSMEG_2942 | glyoxalase/bleomycin resistance prot    | R | POORLY CHARACTERIZED |         | -1.53 | 0.085 | Down |
| MSMEG_6000 | short chain dehydrogenase               | R | POORLY CHARACTERIZED | RV3549C | -1.01 | 0.094 | Down |
| MSMEG_6069 | CobW/P47K domain-containing prote       | R | POORLY CHARACTERIZED | RV0106  | -1.34 | 0.096 | Down |
| MSMEG_2589 | hypothetical protein                    | S | POORLY CHARACTERIZED |         | -1.16 | 0.101 | Down |
| MSMEG_5834 | metallo-beta-lactamase superfamily p    | R | POORLY CHARACTERIZED | RV0786C | -1.28 | 0.116 | Down |
| MSMEG_2066 | hypothetical protein                    | R | POORLY CHARACTERIZED |         | -1.12 | 0.138 | Down |
| MSMEG_6150 | 4-carboxymuconolactone decarboxyl       | S | POORLY CHARACTERIZED |         | -1.01 | 0.143 | Down |
| MSMEG_0780 | phosphotransferase enzyme family pr     | R | POORLY CHARACTERIZED |         | -1.88 | 0.203 | Down |
| MSMEG_2947 | polyketide cyclase/dehydrase            | R | POORLY CHARACTERIZED | RV1716  | -1.19 | 0.262 | Down |
| MSMEG_1844 | hypothetical protein                    | S | POORLY CHARACTERIZED |         | -1.32 | 0.308 | Down |
| MSMEG_1297 | hydroxydechloroatrazine ethylamino      | R | POORLY CHARACTERIZED |         | -1.07 | 0.356 | Down |
| MSMEG_2076 | hypothetical protein                    | S | POORLY CHARACTERIZED | Rv1631  | -1.14 | 0.404 | Down |
| MSMEG_5020 | acetoin(diacetyl) reductase             | R | POORLY CHARACTERIZED |         | -1.07 | 0.420 | Down |
| MSMEG_0437 | hypothetical protein                    | S | POORLY CHARACTERIZED |         | -1.12 | 0.461 | Down |

Table S7. Genes Up / Down regulated in LIX 79 (WT PknK Overexpression Strain at t=96 h)

Upregulated

For filtering upregulation we consider Geomean fold >=1 in treated sample.

Downregulated

For filtering downregulation we consider Geomean fold <= -1 in treated sample.

Expression fold values are provided in terms of log base 2

| LIX79 t96-1 vs. LIX70 t96-1 |                                               |          |                                  |           |              |         |            |
|-----------------------------|-----------------------------------------------|----------|----------------------------------|-----------|--------------|---------|------------|
| GeneName                    | Product                                       | COG_Code | Function                         | RV Number | Geomean_Fold | P-value | Regulation |
| MSMEG_3246                  | response regulator                            | T        | CELLULAR PROCESSES AND SIGNALING |           | 1.42         | 0.002   | Up         |
| MSMEG_2798                  | hypothetical protein                          | O        | CELLULAR PROCESSES AND SIGNALING |           | 1.32         | 0.002   | Up         |
| MSMEG_3895                  | proteasome subunit beta                       | O        | CELLULAR PROCESSES AND SIGNALING | Rv2110c   | 1.17         | 0.003   | Up         |
| MSMEG_4303                  | methyltransferase                             | O        | CELLULAR PROCESSES AND SIGNALING |           | 1.89         | 0.005   | Up         |
| MSMEG_0877                  | dihydropicolinate synthase                    | M        | CELLULAR PROCESSES AND SIGNALING |           | 1.50         | 0.006   | Up         |
| MSMEG_3235                  | amino acid ABC transporter                    | T        | CELLULAR PROCESSES AND SIGNALING |           | 1.09         | 0.012   | Up         |
| MSMEG_0311                  | glycosyltransferase                           | M        | CELLULAR PROCESSES AND SIGNALING | RV0225    | 1.27         | 0.012   | Up         |
| MSMEG_3647                  | forkhead-associated protein                   | T        | CELLULAR PROCESSES AND SIGNALING | RV1827    | 1.20         | 0.024   | Up         |
| MSMEG_6366                  | O-antigen export system, ATP-binding protein  | M        | CELLULAR PROCESSES AND SIGNALING | Rv3781    | 1.48         | 0.028   | Up         |
| MSMEG_0699                  | hypothetical protein                          | O        | CELLULAR PROCESSES AND SIGNALING |           | 2.13         | 0.037   | Up         |
| MSMEG_5738                  | hypothetical protein                          | O        | CELLULAR PROCESSES AND SIGNALING |           | 1.39         | 0.041   | Up         |
| MSMEG_0234                  | metallopeptidase                              | O        | CELLULAR PROCESSES AND SIGNALING | RV0198C   | 1.11         | 0.060   | Up         |
| rfdD                        | dTDP-4-dehydrohamnose reductase               | M        | CELLULAR PROCESSES AND SIGNALING | Rv3266c   | 1.64         | 0.060   | Up         |
| MSMEG_2421                  | hypothetical protein                          | O        | CELLULAR PROCESSES AND SIGNALING | RV2923C   | 2.45         | 0.075   | Up         |
| MSMEG_6091                  | negative regulator of genetic competence C    | O        | CELLULAR PROCESSES AND SIGNALING |           | 1.25         | 0.076   | Up         |
| MSMEG_4231                  | UDP-N-acetylmuramoyl-tripeptide--D-alanyl-    | M        | CELLULAR PROCESSES AND SIGNALING | Rv2157c   | 1.71         | 0.094   | Up         |
| MSMEG_5554                  | ANTAR domain-containing protein               | T        | CELLULAR PROCESSES AND SIGNALING |           | 1.20         | 0.095   | Up         |
| MSMEG_5009                  | ABC transporter                               | V        | CELLULAR PROCESSES AND SIGNALING | RV1272C   | 1.06         | 0.095   | Up         |
| MSMEG_1661                  | D-alanyl-D-alanine carboxypeptidase           | M        | CELLULAR PROCESSES AND SIGNALING | RV3330    | 1.17         | 0.106   | Up         |
| MSMEG_3884                  | hypothetical protein                          | D        | CELLULAR PROCESSES AND SIGNALING | RV2091C   | 1.37         | 0.106   | Up         |
| MSMEG_2806                  | two-component system response regulator       | T        | CELLULAR PROCESSES AND SIGNALING |           | 1.38         | 0.107   | Up         |
| MSMEG_6554                  | ABC transporter ATP-binding protein           | V        | CELLULAR PROCESSES AND SIGNALING | RV1348    | 1.26         | 0.117   | Up         |
| MSMEG_2665                  | hypothetical protein                          | O        | CELLULAR PROCESSES AND SIGNALING | RV2772C   | 1.46         | 0.125   | Up         |
| MSMEG_4968                  | two-component system sensor kinase            | T        | CELLULAR PROCESSES AND SIGNALING |           | 1.47         | 0.127   | Up         |
| MSMEG_2416                  | hypothetical protein                          | D        | CELLULAR PROCESSES AND SIGNALING | RV2927C   | 2.91         | 0.128   | Up         |
| secG                        | preprotein translocase subunit SecG           | U        | CELLULAR PROCESSES AND SIGNALING | Rv1440    | 1.04         | 0.129   | Up         |
| MSMEG_3780                  | adenylate and guanylate cyclase catalytic do  | T        | CELLULAR PROCESSES AND SIGNALING | RV1647    | 1.21         | 0.132   | Up         |
| MSMEG_2433                  | D-alanyl-D-alanine carboxypeptidase           | M        | CELLULAR PROCESSES AND SIGNALING |           | 1.20         | 0.138   | Up         |
| MSMEG_6105                  | cell division protein                         | O        | CELLULAR PROCESSES AND SIGNALING | Rv3610c   | 1.31         | 0.140   | Up         |
| MSMEG_0100                  | phosphotyrosine protein phosphatase ptpb      | T        | CELLULAR PROCESSES AND SIGNALING | Rv0153c   | 1.80         | 0.153   | Up         |
| MSMEG_3477                  | inv protein                                   | M        | CELLULAR PROCESSES AND SIGNALING | RV1566C   | 1.24         | 0.159   | Up         |
| MSMEG_5006                  | phosphohistidine phosphatase                  | T        | CELLULAR PROCESSES AND SIGNALING | RV1276C   | 1.48         | 0.164   | Up         |
| MSMEG_5259                  | hypothetical protein                          | O        | CELLULAR PROCESSES AND SIGNALING | RV1084    | 1.09         | 0.166   | Up         |
| secD                        | preprotein translocase subunit SecD           | U        | CELLULAR PROCESSES AND SIGNALING | RV2587c   | 1.59         | 0.170   | Up         |
| MSMEG_2731                  | DNA repair ATPase                             | D        | CELLULAR PROCESSES AND SIGNALING | RV2731    | 2.08         | 0.176   | Up         |
| MSMEG_2804                  | two-component system sensor kinase            | T        | CELLULAR PROCESSES AND SIGNALING |           | 1.63         | 0.176   | Up         |
| MSMEG_6238                  | two-component system sensor kinase            | T        | CELLULAR PROCESSES AND SIGNALING |           | 1.10         | 0.177   | Up         |
| MSMEG_2087                  | transporter small conductance mechanosen      | M        | CELLULAR PROCESSES AND SIGNALING | RV3104C   | 1.16         | 0.178   | Up         |
| sppA                        | signal peptide peptidase SppA, 67K type       | U        | CELLULAR PROCESSES AND SIGNALING | Rv0724    | 1.59         | 0.182   | Up         |
| MSMEG_1854                  | valosin containing protein-1                  | O        | CELLULAR PROCESSES AND SIGNALING |           | 2.39         | 0.185   | Up         |
| MSMEG_3902                  | ATPase AAA                                    | O        | CELLULAR PROCESSES AND SIGNALING |           | 1.58         | 0.186   | Up         |
| lgt                         | prolipoprotein diacylglycerol transferase     | M        | CELLULAR PROCESSES AND SIGNALING |           | 1.73         | 0.193   | Up         |
| crcB                        | camphor resistance protein CrcB               | D        | CELLULAR PROCESSES AND SIGNALING |           | 1.82         | 0.196   | Up         |
| MSMEG_0067                  | hypothetical protein                          | D        | CELLULAR PROCESSES AND SIGNALING |           | 1.24         | 0.199   | Up         |
| MSMEG_3213                  | hypothetical protein                          | V        | CELLULAR PROCESSES AND SIGNALING | RV3263    | 1.70         | 0.208   | Up         |
| MSMEG_0064                  | PPE family protein                            | N        | CELLULAR PROCESSES AND SIGNALING | Rv3873    | 1.83         | 0.213   | Up         |
| MSMEG_4217                  | DivIVA protein                                | D        | CELLULAR PROCESSES AND SIGNALING |           | 1.04         | 0.214   | Up         |
| MSMEG_3146                  | invasin 1                                     | M        | CELLULAR PROCESSES AND SIGNALING | RV1478    | 1.42         | 0.223   | Up         |
| MSMEG_0617                  | fsk/SpolIIE family protein                    | D        | CELLULAR PROCESSES AND SIGNALING |           | 2.40         | 0.226   | Up         |
| mrsB                        | methionine-R-sulfoxide reductase              | O        | CELLULAR PROCESSES AND SIGNALING | RV2674    | 1.47         | 0.234   | Up         |
| MSMEG_5641                  | glycoside hydrolase family protein            | M        | CELLULAR PROCESSES AND SIGNALING |           | 1.10         | 0.236   | Up         |
| MSMEG_3239                  | two-component system sensor kinase            | T        | CELLULAR PROCESSES AND SIGNALING |           | 1.66         | 0.248   | Up         |
| MSMEG_0993                  | histidine kinase                              | T        | CELLULAR PROCESSES AND SIGNALING |           | 2.20         | 0.252   | Up         |
| MSMEG_3119                  | ABC transporter ATP-binding protein           | V        | CELLULAR PROCESSES AND SIGNALING | RV1458C   | 2.02         | 0.255   | Up         |
| murD                        | UDP-N-acetylmuramoyl-L-alanyl-D-glutamate     | M        | CELLULAR PROCESSES AND SIGNALING | Rv2155c   | 1.96         | 0.273   | Up         |
| MSMEG_4225                  | cell division protein FtsQ                    | M        | CELLULAR PROCESSES AND SIGNALING | Rv2151c   | 1.71         | 0.282   | Up         |
| MSMEG_0032                  | cell cycle protein, FtsW/RodA/SpoVE family    | D        | CELLULAR PROCESSES AND SIGNALING | Rv2154c   | 1.10         | 0.286   | Up         |
| dacB                        | D-alanyl-D-alanine carboxypeptidase/D-alanyl  | M        | CELLULAR PROCESSES AND SIGNALING | RV3627C   | 1.52         | 0.288   | Up         |
| MSMEG_4253                  | glycoside hydrolase family protein            | M        | CELLULAR PROCESSES AND SIGNALING | Rv0557    | 2.05         | 0.291   | Up         |
| MSMEG_6087                  | beta-lactamase                                | V        | CELLULAR PROCESSES AND SIGNALING | Rv3593    | 1.17         | 0.293   | Up         |
| MSMEG_3622                  | hypothetical protein                          | O        | CELLULAR PROCESSES AND SIGNALING | Rv1853    | 1.54         | 0.296   | Up         |
| hypE                        | hydrogenase expression/formation protein H    | O        | CELLULAR PROCESSES AND SIGNALING |           | 1.29         | 0.298   | Up         |
| MSMEG_3029                  | peptidase, A24 (type IV prepilin peptidase) f | U        | CELLULAR PROCESSES AND SIGNALING | RV2551C   | 1.97         | 0.300   | Up         |
| MSMEG_6900                  | penicillin-binding protein 1                  | M        | CELLULAR PROCESSES AND SIGNALING | Rv0050    | 1.48         | 0.308   | Up         |
| MSMEG_1096                  | urease accessory protein UreD                 | O        | CELLULAR PROCESSES AND SIGNALING |           | 1.46         | 0.309   | Up         |
| MSMEG_4349                  | hypothetical protein                          | O        | CELLULAR PROCESSES AND SIGNALING | RV2264C   | 1.05         | 0.318   | Up         |
| MSMEG_2793                  | sensor-type histidine kinase PrrB             | T        | CELLULAR PROCESSES AND SIGNALING |           | 1.46         | 0.327   | Up         |
| MSMEG_5695                  | glutathione S-transferase                     | O        | CELLULAR PROCESSES AND SIGNALING |           | 1.36         | 0.336   | Up         |
| MSMEG_4576                  | SpH domain-containing protein                 | O        | CELLULAR PROCESSES AND SIGNALING |           | 1.90         | 0.337   | Up         |
| air                         | alanine racemase                              | M        | CELLULAR PROCESSES AND SIGNALING | Rv3423c   | 1.51         | 0.351   | Up         |
| lspA                        | lipoprotein signal peptidase                  | U        | CELLULAR PROCESSES AND SIGNALING | RV1539    | 1.07         | 0.356   | Up         |
| MSMEG_6133                  | 5-dehydro-4-deoxyglucarate dehydratase        | M        | CELLULAR PROCESSES AND SIGNALING |           | 1.22         | 0.366   | Up         |
| lexA                        | LexA repressor                                | T        | CELLULAR PROCESSES AND SIGNALING | Rv2720    | 2.16         | 0.379   | Up         |
| MSMEG_3761                  | Clp protease subunit                          | O        | CELLULAR PROCESSES AND SIGNALING |           | 1.03         | 0.384   | Up         |
| ftsZ                        | cell division protein FtsZ                    | D        | CELLULAR PROCESSES AND SIGNALING | Rv2150c   | 1.25         | 0.384   | Up         |
| MSMEG_4233                  | penicillin binding protein transpeptidase do  | M        | CELLULAR PROCESSES AND SIGNALING | Rv2163c   | 1.68         | 0.409   | Up         |
| MSMEG_6171                  | hypothetical protein                          | D        | CELLULAR PROCESSES AND SIGNALING | RV3660C   | 1.86         | 0.415   | Up         |
| MSMEG_0627                  | glycosyl transferase family protein           | M        | CELLULAR PROCESSES AND SIGNALING |           | 1.74         | 0.420   | Up         |
| ginD                        | PII uridylyl-transferase                      | O        | CELLULAR PROCESSES AND SIGNALING | Rv2918c   | 2.10         | 0.429   | Up         |
| MSMEG_5076                  | ABC transporter                               | M        | CELLULAR PROCESSES AND SIGNALING | RV1217C   | 1.02         | 0.439   | Up         |
| MSMEG_3145                  | secreted cell wall-associated hydrolase       | M        | CELLULAR PROCESSES AND SIGNALING | RV1477    | 1.40         | 0.443   | Up         |
| MSMEG_2584                  | penicillin-binding protein                    | M        | CELLULAR PROCESSES AND SIGNALING | RV2864C   | 1.64         | 0.452   | Up         |
| MSMEG_1624                  | universal stress protein family protein       | T        | CELLULAR PROCESSES AND SIGNALING |           | 1.80         | 0.452   | Up         |
| smc                         | chromosome segregation protein SMC            | D        | CELLULAR PROCESSES AND SIGNALING | RV2922c   | 1.65         | 0.470   | Up         |
| MSMEG_0973                  | hypothetical protein                          | O        | CELLULAR PROCESSES AND SIGNALING | RV0528    | 1.37         | 0.473   | Up         |
| MSMEG_4279                  | adenylate and guanylate cyclase catalytic do  | T        | CELLULAR PROCESSES AND SIGNALING | RV2212    | 1.72         | 0.481   | Up         |
| MSMEG_4256                  | NLP/P60 family protein                        | M        | CELLULAR PROCESSES AND SIGNALING | RV2190C   | 1.59         | 0.481   | Up         |
| MSMEG_2739                  | hypothetical protein                          | M        | CELLULAR PROCESSES AND SIGNALING | RV2721C   | 1.12         | 0.482   | Up         |
| MSMEG_3860                  | polyprenol-monophosphomannose synthase        | M        | CELLULAR PROCESSES AND SIGNALING | RV2051c   | 1.55         | 0.498   | Up         |
| MSMEG_6318                  | diol dehydratase reactivation protein         | D        | CELLULAR PROCESSES AND SIGNALING |           | 1.56         | 0.498   | Up         |
| murG                        | UDPdi(phospho-muramoyl)pentapeptide beta      | M        | CELLULAR PROCESSES AND SIGNALING | Rv2153c   | 1.66         | 0.498   | Up         |
| MSMEG_5075                  | ABC transporter ATP-binding protein           | V        | CELLULAR PROCESSES AND SIGNALING | RV1218C   | 1.73         | 0.500   | Up         |
| MSMEG_0972                  | cytochrome C biogenesis protein transmem      | O        | CELLULAR PROCESSES AND SIGNALING | Rv0527    | 1.12         | 0.511   | Up         |
| MSMEG_1536                  | fsk/SpolIIE family protein                    | D        | CELLULAR PROCESSES AND SIGNALING |           | 1.49         | 0.515   | Up         |

|            |                                               |   |                                    |         |      |       |    |
|------------|-----------------------------------------------|---|------------------------------------|---------|------|-------|----|
| MSMEG_2181 | cell filamentation protein                    | D | CELLULAR PROCESSES AND SIGNALING   | Rv3641c | 1.25 | 0.515 | Up |
| murE       | UDP-N-acetylmuramoylalanyl-D-glutamate-2      | M | CELLULAR PROCESSES AND SIGNALING   |         | 1.15 | 0.536 | Up |
| ftsW       | cell division protein FtsW                    | D | CELLULAR PROCESSES AND SIGNALING   | RV2154C | 1.21 | 0.555 | Up |
| MSMEG_3480 | streptomycin 6-kinase                         | V | CELLULAR PROCESSES AND SIGNALING   |         | 1.41 | 0.555 | Up |
| MSMEG_6168 | type II secretion system protein F            | U | CELLULAR PROCESSES AND SIGNALING   | RV3658C | 1.38 | 0.561 | Up |
| MSMEG_0680 | UDP-glucose 6-dehydrogenase                   | M | CELLULAR PROCESSES AND SIGNALING   | Rv0322  | 1.35 | 0.612 | Up |
| MSMEG_0619 | PPE family protein                            | N | CELLULAR PROCESSES AND SIGNALING   | Rv0286  | 1.04 | 0.640 | Up |
| MSMEG_1533 | subtilase                                     | O | CELLULAR PROCESSES AND SIGNALING   | Rv3449  | 1.60 | 0.644 | Up |
| mraY       | phospho-N-acetylmuramoyl-pentapeptide-tr      | M | CELLULAR PROCESSES AND SIGNALING   |         | 1.21 | 0.646 | Up |
| MSMEG_2489 | GntR family transcriptional regulator         | K | INFORMATION STORAGE AND PROCESSING |         | 2.16 | 0.007 | Up |
| MSMEG_5451 | alkylated DNA repair protein                  | L | INFORMATION STORAGE AND PROCESSING | RV1000C | 1.09 | 0.012 | Up |
| MSMEG_1648 | transcriptional regulator                     | K | INFORMATION STORAGE AND PROCESSING |         | 1.01 | 0.016 | Up |
| MSMEG_4339 | hypothetical protein                          | K | INFORMATION STORAGE AND PROCESSING |         | 1.12 | 0.020 | Up |
| MSMEG_4925 | transcriptional regulator, Ada family protein | L | INFORMATION STORAGE AND PROCESSING |         | 1.52 | 0.023 | Up |
| MSMEG_0244 | two component response transcriptional reg    | K | INFORMATION STORAGE AND PROCESSING |         | 1.05 | 0.027 | Up |
| MSMEG_3630 | CopY family transcriptional regulator protein | K | INFORMATION STORAGE AND PROCESSING |         | 1.42 | 0.038 | Up |
| rplV       | 50S ribosomal protein L22                     | J | INFORMATION STORAGE AND PROCESSING | Rv0706  | 1.05 | 0.042 | Up |
| MSMEG_0092 | transcriptional regulatory protein            | K | INFORMATION STORAGE AND PROCESSING | RV0144  | 1.14 | 0.045 | Up |
| MSMEG_6125 | transcriptional regulatory protein            | K | INFORMATION STORAGE AND PROCESSING |         | 1.49 | 0.045 | Up |
| greA       | transcription elongation factor GreA          | K | INFORMATION STORAGE AND PROCESSING | Rv1080c | 1.31 | 0.051 | Up |
| MSMEG_4659 | GntR family transcriptional regulator         | K | INFORMATION STORAGE AND PROCESSING |         | 1.87 | 0.056 | Up |
| MSMEG_3173 | L-asparaginase                                | J | INFORMATION STORAGE AND PROCESSING | Rv1538c | 2.39 | 0.074 | Up |
| MSMEG_2553 | TetR family transcriptional regulator         | K | INFORMATION STORAGE AND PROCESSING |         | 1.23 | 0.077 | Up |
| MSMEG_4449 | transcriptional regulator                     | K | INFORMATION STORAGE AND PROCESSING |         | 1.62 | 0.078 | Up |
| MSMEG_6191 | translation initiation inhibitor              | J | INFORMATION STORAGE AND PROCESSING | RV3678C | 1.55 | 0.080 | Up |
| MSMEG_5019 | regulatory protein                            | K | INFORMATION STORAGE AND PROCESSING |         | 2.16 | 0.086 | Up |
| uvrB       | excinuclease ABC subunit B                    | L | INFORMATION STORAGE AND PROCESSING | Rv1633  | 1.14 | 0.086 | Up |
| MSMEG_5706 | DNA or RNA helicase of superfamily protein H  | L | INFORMATION STORAGE AND PROCESSING | Rv0861c | 2.07 | 0.098 | Up |
| ksgA       | dimethyladenosine transferase                 | J | INFORMATION STORAGE AND PROCESSING |         | 1.21 | 0.102 | Up |
| MSMEG_5309 | hypothetical protein                          | K | INFORMATION STORAGE AND PROCESSING |         | 1.05 | 0.111 | Up |
| MSMEG_6077 | Card family transcriptional regulator         | K | INFORMATION STORAGE AND PROCESSING | RV3583C | 1.28 | 0.116 | Up |
| MSMEG_2507 | hypothetical protein                          | K | INFORMATION STORAGE AND PROCESSING |         | 1.19 | 0.116 | Up |
| MSMEG_6044 | ligand-binding/sugar binding domain-contain   | K | INFORMATION STORAGE AND PROCESSING | RV3575C | 1.38 | 0.117 | Up |
| MSMEG_2105 | ATP dependent DNA ligase                      | L | INFORMATION STORAGE AND PROCESSING |         | 1.41 | 0.118 | Up |
| MSMEG_5025 | transcriptional regulator                     | K | INFORMATION STORAGE AND PROCESSING |         | 1.26 | 0.120 | Up |
| MSMEG_1939 | 6-O-methylguanine DNA methyltransferase       | L | INFORMATION STORAGE AND PROCESSING | RV3204  | 1.09 | 0.123 | Up |
| MSMEG_3191 | hypothetical protein                          | J | INFORMATION STORAGE AND PROCESSING | RV1571  | 2.30 | 0.127 | Up |
| ruvC       | Holliday junction resolvase                   | L | INFORMATION STORAGE AND PROCESSING | Rv2594c | 1.79 | 0.131 | Up |
| MSMEG_6275 | DNA polymerase III subunit epsilon            | K | INFORMATION STORAGE AND PROCESSING | Rv3711c | 2.39 | 0.136 | Up |
| MSMEG_4394 | LysR family transcriptional regulator         | K | INFORMATION STORAGE AND PROCESSING |         | 1.14 | 0.140 | Up |
| MSMEG_5375 | GntR family transcriptional regulator         | K | INFORMATION STORAGE AND PROCESSING |         | 1.13 | 0.141 | Up |
| MSMEG_4174 | IcIR family transcriptional regulator         | K | INFORMATION STORAGE AND PROCESSING |         | 1.25 | 0.145 | Up |
| MSMEG_4969 | two-component system response regulator       | K | INFORMATION STORAGE AND PROCESSING |         | 1.06 | 0.151 | Up |
| mnmA       | tRNA-specific 2-thiouridylylase MnmA          | J | INFORMATION STORAGE AND PROCESSING |         | 1.98 | 0.153 | Up |
| MSMEG_6083 | base excision DNA repair protein, HhH-GPD H   | L | INFORMATION STORAGE AND PROCESSING | Rv3589  | 1.41 | 0.156 | Up |
| MSMEG_1139 | transcriptional regulator                     | K | INFORMATION STORAGE AND PROCESSING |         | 1.06 | 0.159 | Up |
| MSMEG_6864 | transcriptional regulator                     | K | INFORMATION STORAGE AND PROCESSING |         | 1.33 | 0.159 | Up |
| MSMEG_6931 | RNA polymerase sigma-70 factor                | K | INFORMATION STORAGE AND PROCESSING | Rv3911  | 2.17 | 0.165 | Up |
| MSMEG_5193 | AraC family transcriptional regulator         | K | INFORMATION STORAGE AND PROCESSING |         | 1.61 | 0.170 | Up |
| MSMEG_4626 | ribonuclease, Rne/Rng family protein          | J | INFORMATION STORAGE AND PROCESSING | Rv2444c | 1.37 | 0.171 | Up |
| MSMEG_3822 | GntR family transcriptional regulator         | K | INFORMATION STORAGE AND PROCESSING |         | 1.35 | 0.175 | Up |
| MSMEG_3677 | serine/threonine protein kinase               | L | INFORMATION STORAGE AND PROCESSING | Rv1746  | 1.53 | 0.177 | Up |
| MSMEG_6174 | IcIR family transcriptional regulator         | K | INFORMATION STORAGE AND PROCESSING |         | 1.91 | 0.177 | Up |
| MSMEG_3644 | MerR family transcriptional regulator         | K | INFORMATION STORAGE AND PROCESSING | RV1830  | 1.39 | 0.178 | Up |
| MSMEG_5673 | transcriptional regulator                     | K | INFORMATION STORAGE AND PROCESSING |         | 2.13 | 0.180 | Up |
| MSMEG_5696 | cold-shock DNA-binding domain-containing p    | K | INFORMATION STORAGE AND PROCESSING | Rv0871  | 1.40 | 0.186 | Up |
| mtrA       | DNA-binding response regulator MtrA           | K | INFORMATION STORAGE AND PROCESSING | Rv3246c | 1.30 | 0.194 | Up |
| xerC       | site-specific tyrosine recombinase XerC       | L | INFORMATION STORAGE AND PROCESSING | Rv2894c | 1.90 | 0.195 | Up |
| MSMEG_2106 | transcriptional regulator                     | K | INFORMATION STORAGE AND PROCESSING |         | 1.99 | 0.195 | Up |
| MSMEG_5282 | transcriptional regulator                     | K | INFORMATION STORAGE AND PROCESSING |         | 1.03 | 0.197 | Up |
| MSMEG_4898 | hypothetical protein                          | K | INFORMATION STORAGE AND PROCESSING | RV1343C | 1.52 | 0.201 | Up |
| MSMEG_0028 | serine-threonine protein kinase               | L | INFORMATION STORAGE AND PROCESSING | Rv0014c | 1.31 | 0.205 | Up |
| ruvA       | Holliday junction DNA helicase RuvA           | L | INFORMATION STORAGE AND PROCESSING | Rv2593c | 1.43 | 0.206 | Up |
| MSMEG_0207 | MarR family transcriptional regulator         | K | INFORMATION STORAGE AND PROCESSING |         | 1.17 | 0.206 | Up |
| pth        | peptidyl-tRNA hydrolase                       | J | INFORMATION STORAGE AND PROCESSING | Rv1014c | 1.05 | 0.207 | Up |
| gatA       | glutamyl-tRNA(Gln)/aspartyl-tRNA(Asn) amid    | J | INFORMATION STORAGE AND PROCESSING | Rv3011c | 1.59 | 0.225 | Up |
| dnaE       | DNA polymerase III subunit alpha              | L | INFORMATION STORAGE AND PROCESSING |         | 1.51 | 0.229 | Up |
| MSMEG_2120 | hypothetical protein                          | K | INFORMATION STORAGE AND PROCESSING |         | 2.48 | 0.229 | Up |
| MSMEG_5838 | TetR family transcriptional regulator         | K | INFORMATION STORAGE AND PROCESSING |         | 1.49 | 0.231 | Up |
| MSMEG_3240 | LuxR family transcriptional regulator         | K | INFORMATION STORAGE AND PROCESSING |         | 1.08 | 0.233 | Up |
| nth        | endonuclease III                              | L | INFORMATION STORAGE AND PROCESSING | Rv3674c | 1.26 | 0.242 | Up |
| alaS       | alanyl-tRNA synthetase                        | J | INFORMATION STORAGE AND PROCESSING | Rv2555c | 1.38 | 0.243 | Up |
| selB       | selenocysteine-specific translation elongatio | J | INFORMATION STORAGE AND PROCESSING |         | 2.79 | 0.245 | Up |
| MSMEG_6096 | pantothenate kinase                           | K | INFORMATION STORAGE AND PROCESSING |         | 2.45 | 0.248 | Up |
| MSMEG_6128 | two-component system response regulator       | K | INFORMATION STORAGE AND PROCESSING |         | 1.66 | 0.250 | Up |
| MSMEG_2182 | transcriptional regulator                     | K | INFORMATION STORAGE AND PROCESSING | RV0258C | 1.43 | 0.256 | Up |
| lysS       | lysyl-tRNA synthetase                         | J | INFORMATION STORAGE AND PROCESSING |         | 1.26 | 0.270 | Up |
| rph        | ribonuclease PH                               | J | INFORMATION STORAGE AND PROCESSING |         | 1.34 | 0.276 | Up |
| hrpA       | ATP-dependent helicase HrpA                   | L | INFORMATION STORAGE AND PROCESSING |         | 2.16 | 0.283 | Up |
| MSMEG_6926 | tRNA adenylyltransferase                      | J | INFORMATION STORAGE AND PROCESSING |         | 2.01 | 0.293 | Up |
| MSMEG_5987 | two-component regulator                       | K | INFORMATION STORAGE AND PROCESSING |         | 1.49 | 0.293 | Up |
| MSMEG_4912 | helicase                                      | K | INFORMATION STORAGE AND PROCESSING | Rv1329c | 1.68 | 0.299 | Up |
| MSMEG_2453 | GntR family transcriptional regulator         | K | INFORMATION STORAGE AND PROCESSING |         | 1.21 | 0.311 | Up |
| MSMEG_4964 | TetR family transcriptional regulator         | K | INFORMATION STORAGE AND PROCESSING |         | 1.13 | 0.311 | Up |
| MSMEG_6682 | RNA polymerase sigma-70 factor                | K | INFORMATION STORAGE AND PROCESSING |         | 1.09 | 0.311 | Up |
| rimM       | 16S rRNA-processing protein RimM              | J | INFORMATION STORAGE AND PROCESSING | Rv2907c | 1.24 | 0.334 | Up |
| MSMEG_0592 | ribose catabolism operon transcriptional      | K | INFORMATION STORAGE AND PROCESSING |         | 1.66 | 0.337 | Up |
| MSMEG_3505 | 6-aminohexanoate-cyclic-dimer hydrolase       | J | INFORMATION STORAGE AND PROCESSING |         | 2.19 | 0.343 | Up |
| MSMEG_0105 | LuxR family transcriptional regulator         | K | INFORMATION STORAGE AND PROCESSING | Rv0844c | 1.37 | 0.350 | Up |
| MSMEG_1681 | endoribonuclease L-PSF superfamily protein    | J | INFORMATION STORAGE AND PROCESSING |         | 1.45 | 0.350 | Up |
| MSMEG_3885 | DEAD/DEAH box helicase                        | L | INFORMATION STORAGE AND PROCESSING | Rv2092c | 2.13 | 0.355 | Up |
| MSMEG_6327 | cytidine and deoxycytidylate deaminase        | J | INFORMATION STORAGE AND PROCESSING | Rv3752c | 1.36 | 0.363 | Up |
| MSMEG_1902 | transcriptional regulator                     | K | INFORMATION STORAGE AND PROCESSING |         | 1.59 | 0.366 | Up |
| recO       | DNA repair protein RecO                       | L | INFORMATION STORAGE AND PROCESSING | Rv2362c | 1.21 | 0.379 | Up |
| MSMEG_4486 | ArsR family transcriptional regulator         | K | INFORMATION STORAGE AND PROCESSING | RV2358  | 1.57 | 0.400 | Up |
| MSMEG_4572 | hypothetical protein                          | L | INFORMATION STORAGE AND PROCESSING | RV2413C | 1.44 | 0.404 | Up |
| atzF       | allophanate hydrolase                         | J | INFORMATION STORAGE AND PROCESSING |         | 1.36 | 0.407 | Up |
| MSMEG_3026 | Holliday junction resolvase-like protein      | L | INFORMATION STORAGE AND PROCESSING | RV2554C | 1.10 | 0.408 | Up |
| xseB       | exodeoxyribonuclease VII small subunit        | L | INFORMATION STORAGE AND PROCESSING | Rv1107c | 1.17 | 0.410 | Up |
| MSMEG_6903 | PadR family transcriptional regulator         | K | INFORMATION STORAGE AND PROCESSING | RV0047C | 1.14 | 0.419 | Up |
| ung        | uracil-DNA glycosylase                        | L | INFORMATION STORAGE AND PROCESSING | Rv2976c | 1.45 | 0.421 | Up |
| MSMEG_1646 | ribosomal RNA adenine dimethylase             | J | INFORMATION STORAGE AND PROCESSING |         | 1.98 | 0.431 | Up |
| MSMEG_3790 | TrmH family RNA methyltransferase             | J | INFORMATION STORAGE AND PROCESSING | Rv1644  | 1.13 | 0.438 | Up |
| MSMEG_0691 | transcriptional regulatory protein            | K | INFORMATION STORAGE AND PROCESSING | RV0339C | 1.44 | 0.439 | Up |
| MSMEG_4304 | regulatory protein                            | K | INFORMATION STORAGE AND PROCESSING |         | 1.64 | 0.461 | Up |
| MSMEG_2472 | AsnC family transcriptional regulator         | K | INFORMATION STORAGE AND PROCESSING |         | 1.06 | 0.462 | Up |
| MSMEG_1692 | ECF-family protein RNA polymerase sigma fac   | K | INFORMATION STORAGE AND PROCESSING |         | 1.51 | 0.465 | Up |
| MSMEG_6673 | 6-aminohexanoate-cyclic-dimer hydrolase       | J | INFORMATION STORAGE AND PROCESSING |         | 1.08 | 0.479 | Up |



|            |                                                      |   |                                    |          |      |       |    |
|------------|------------------------------------------------------|---|------------------------------------|----------|------|-------|----|
| MSMEG_2576 | deoxyribodipyrimidine photo-lyase                    | L | INFORMATION STORAGE AND PROCESSING |          | 1.07 | 0.488 | Up |
| MSMEG_6421 | transcriptional regulator                            | K | INFORMATION STORAGE AND PROCESSING | RV3840   | 1.47 | 0.489 | Up |
| MSMEG_5513 | serine/threonine protein kinase                      | L | INFORMATION STORAGE AND PROCESSING |          | 1.35 | 0.493 | Up |
| MSMEG_1901 | DNA-binding,HTH domain-containing protein            | K | INFORMATION STORAGE AND PROCESSING |          | 1.32 | 0.502 | Up |
| MSMEG_4205 | transcriptional regulator                            | K | INFORMATION STORAGE AND PROCESSING |          | 1.11 | 0.503 | Up |
| MSMEG_5074 | transcriptional regulatory protein                   | K | INFORMATION STORAGE AND PROCESSING | RV1219C  | 2.02 | 0.505 | Up |
| dnaG       | DNA primase                                          | L | INFORMATION STORAGE AND PROCESSING | Rv2343c  | 1.15 | 0.505 | Up |
| MSMEG_1700 | TetR family transcriptional regulator                | K | INFORMATION STORAGE AND PROCESSING |          | 1.41 | 0.507 | Up |
| MSMEG_5004 | DNA repair exonuclease                               | L | INFORMATION STORAGE AND PROCESSING | RV1277   | 1.24 | 0.508 | Up |
| MSMEG_4517 | TetR family transcriptional regulator                | K | INFORMATION STORAGE AND PROCESSING |          | 1.45 | 0.511 | Up |
| rho        | transcription termination factor Rho                 | K | INFORMATION STORAGE AND PROCESSING | Rv1297   | 1.45 | 0.519 | Up |
| MSMEG_3193 | TetR family transcriptional regulator                | K | INFORMATION STORAGE AND PROCESSING |          | 1.55 | 0.520 | Up |
| MSMEG_0367 | O-demethylpuromycin-O-methyltransferase              | J | INFORMATION STORAGE AND PROCESSING |          | 1.51 | 0.526 | Up |
| MSMEG_4022 | TetR family transcriptional regulator                | K | INFORMATION STORAGE AND PROCESSING |          | 1.16 | 0.534 | Up |
| MSMEG_3856 | CadC family transcriptional regulator                | K | INFORMATION STORAGE AND PROCESSING |          | 1.04 | 0.550 | Up |
| MSMEG_4366 | serine/threonine protein kinase                      | L | INFORMATION STORAGE AND PROCESSING |          | 1.10 | 0.553 | Up |
| MSMEG_3172 | DNA polymerase IV                                    | L | INFORMATION STORAGE AND PROCESSING |          | 1.50 | 0.556 | Up |
| trmD       | tRNA [guanine-N(1)-]methyltransferase                | J | INFORMATION STORAGE AND PROCESSING | Rv2906c  | 1.01 | 0.570 | Up |
| MSMEG_1941 | helicase, UvrD/Rep family protein                    | L | INFORMATION STORAGE AND PROCESSING | RV3202C  | 1.65 | 0.604 | Up |
| MSMEG_1943 | ATP-dependent DNA helicase                           | L | INFORMATION STORAGE AND PROCESSING | RV3201C  | 1.09 | 0.612 | Up |
| priA       | primosome assembly protein PriA                      | L | INFORMATION STORAGE AND PROCESSING | Rv1402   | 1.65 | 0.666 | Up |
| MSMEG_1540 | ATP-dependent RNA helicase                           | J | INFORMATION STORAGE AND PROCESSING |          | 1.24 | 0.709 | Up |
| eutC       | ethanolamine ammonia-lyase small subunit             | E | METABOLISM                         |          | 2.28 | 0.006 | Up |
| MSMEG_4908 | endo-type 6-aminohexanoate oligomer hydrolase        | Q | METABOLISM                         | RV1333   | 1.70 | 0.009 | Up |
| MSMEG_2422 | acylphosphatase                                      | C | METABOLISM                         | Rv2922A  | 1.61 | 0.010 | Up |
| MSMEG_3108 | ABC transporter ATPase                               | G | METABOLISM                         |          | 1.24 | 0.010 | Up |
| MSMEG_3266 | maltose/maltodextrin-binding protein                 | G | METABOLISM                         |          | 1.10 | 0.012 | Up |
| phhB       | pterin-4-alpha-carbinolamine dehydratase             | H | METABOLISM                         |          | 2.19 | 0.016 | Up |
| MSMEG_2597 | aldehyde dehydrogenase                               | C | METABOLISM                         | Rv2858c  | 1.90 | 0.022 | Up |
| etfA       | electron transfer flavoprotein subunit alpha         | C | METABOLISM                         |          | 1.26 | 0.023 | Up |
| add        | adenosine deaminase                                  | F | METABOLISM                         | Rv3313c  | 1.31 | 0.024 | Up |
| trpB       | tryptophan synthase subunit beta                     | E | METABOLISM                         | Rv1612   | 1.51 | 0.027 | Up |
| MSMEG_3187 | acyltransferase domain-containing protein            | I | METABOLISM                         | RV1565C  | 1.11 | 0.029 | Up |
| MSMEG_6195 | ion-transporting ATPase                              | P | METABOLISM                         | RV3680   | 1.21 | 0.029 | Up |
| MSMEG_5163 | glycine/betaine ABC transporter periplasmic domain   | E | METABOLISM                         |          | 1.63 | 0.035 | Up |
| MSMEG_6041 | acyl-CoA dehydrogenase                               | I | METABOLISM                         | Rv3573c  | 1.33 | 0.036 | Up |
| pgm        | phosphoglucomutase                                   | G | METABOLISM                         | Rv3068c  | 1.04 | 0.040 | Up |
| MSMEG_2342 | glycosyltransferase                                  | C | METABOLISM                         |          | 1.39 | 0.041 | Up |
| MSMEG_2469 | AMP-dependent synthetase/ligase                      | Q | METABOLISM                         |          | 2.92 | 0.041 | Up |
| MSMEG_3848 | para-nitrobenzyl esterase                            | I | METABOLISM                         | Rv2045c  | 1.45 | 0.042 | Up |
| MSMEG_2488 | [NADP+] succinate-semialdehyde dehydrogenase         | C | METABOLISM                         |          | 2.40 | 0.042 | Up |
| MSMEG_5988 | hypothetical protein                                 | I | METABOLISM                         |          | 1.30 | 0.044 | Up |
| MSMEG_4662 | deoxyribose-phosphate aldolase superfamily           | G | METABOLISM                         |          | 1.49 | 0.047 | Up |
| MSMEG_5404 | propionate-CoA ligase                                | I | METABOLISM                         |          | 1.26 | 0.048 | Up |
| cbiQ       | cobalt ABC transporter permease                      | P | METABOLISM                         |          | 1.71 | 0.048 | Up |
| MSMEG_6483 | methyltransferase type 11                            | H | METABOLISM                         |          | 1.36 | 0.051 | Up |
| MSMEG_2632 | SAM-dependent methyltransferase                      | H | METABOLISM                         | RV2794C  | 2.02 | 0.053 | Up |
| MSMEG_2648 | Sfp-type phosphopantetheinyl transferase             | Q | METABOLISM                         |          | 1.24 | 0.054 | Up |
| ggT        | gamma-glutamyltranspeptidase                         | E | METABOLISM                         | Rv0773c  | 1.63 | 0.055 | Up |
| MSMEG_2878 | acyl-CoA dehydrogenase                               | I | METABOLISM                         |          | 1.38 | 0.055 | Up |
| leuB       | 3-isopropylmalate dehydrogenase                      | E | METABOLISM                         | Rv2995c  | 1.49 | 0.055 | Up |
| MSMEG_4519 | Nr1c protein                                         | I | METABOLISM                         |          | 2.13 | 0.057 | Up |
| dut        | deoxyuridine 5'-triphosphate nucleotidohydrolase     | F | METABOLISM                         | Rv2697c  | 1.89 | 0.057 | Up |
| MSMEG_4579 | phosphoglycerate mutase                              | G | METABOLISM                         | RV2419C  | 2.30 | 0.059 | Up |
| MSMEG_6250 | glutamate-cysteine ligase                            | H | METABOLISM                         | Rv3704c  | 1.54 | 0.062 | Up |
| MSMEG_0741 | hypothetical protein                                 | C | METABOLISM                         |          | 1.06 | 0.063 | Up |
| MSMEG_3125 | cysteine desulfurase                                 | E | METABOLISM                         |          | 1.21 | 0.063 | Up |
| MSMEG_4474 | acyl-CoA oxidase                                     | I | METABOLISM                         | RV1464   | 1.60 | 0.063 | Up |
| MSMEG_0200 | hypothetical protein                                 | C | METABOLISM                         |          | 1.09 | 0.064 | Up |
| MSMEG_2760 | polyphosphate glucokinase                            | G | METABOLISM                         | Rv2702   | 1.03 | 0.065 | Up |
| MSMEG_0762 | cytochrome P450                                      | Q | METABOLISM                         |          | 1.00 | 0.066 | Up |
| MSMEG_5970 | glutamate-1-semialdehyde 2,1-aminomutase             | H | METABOLISM                         |          | 1.51 | 0.067 | Up |
| MSMEG_2941 | NAD dependent epimerase/dehydratase                  | G | METABOLISM                         |          | 1.06 | 0.075 | Up |
| MSMEG_2503 | hypothetical protein                                 | P | METABOLISM                         |          | 1.04 | 0.077 | Up |
| MSMEG_5863 | cytochrome P450                                      | Q | METABOLISM                         | Rv0764c  | 1.22 | 0.078 | Up |
| MSMEG_5906 | acyl-CoA dehydrogenase                               | I | METABOLISM                         | Rv3504   | 1.05 | 0.078 | Up |
| sodC       | copper/zinc superoxide dismutase                     | P | METABOLISM                         | Rv0432   | 1.17 | 0.079 | Up |
| MSMEG_0662 | putrescine transport ATP-binding protein             | E | METABOLISM                         |          | 1.39 | 0.082 | Up |
| MSMEG_6591 | class V aminotransferase                             | E | METABOLISM                         |          | 1.05 | 0.084 | Up |
| MSMEG_1245 | phosphoadenosine phosphosulfate reductase            | H | METABOLISM                         |          | 1.04 | 0.088 | Up |
| MSMEG_0667 | butyryl-CoA dehydrogenase                            | I | METABOLISM                         |          | 1.71 | 0.091 | Up |
| MSMEG_6914 | hypothetical protein                                 | G | METABOLISM                         |          | 1.69 | 0.091 | Up |
| MSMEG_2726 | glutamate permease                                   | E | METABOLISM                         |          | 1.18 | 0.093 | Up |
| MSMEG_5699 | ThiS family protein                                  | H | METABOLISM                         | Rv0868c  | 2.19 | 0.094 | Up |
| MSMEG_1062 | O-succinylbenzoic acid-CoA ligase                    | Q | METABOLISM                         | Rv0542c  | 1.08 | 0.094 | Up |
| MSMEG_5619 | acyl-CoA dehydrogenase                               | I | METABOLISM                         |          | 1.41 | 0.099 | Up |
| MSMEG_6533 | hypothetical protein                                 | I | METABOLISM                         |          | 1.41 | 0.100 | Up |
| otsB       | trehalose-phosphatase                                | G | METABOLISM                         |          | 1.53 | 0.103 | Up |
| MSMEG_4328 | 3-oxoacyl-ACP synthase                               | Q | METABOLISM                         | Rv2246   | 1.25 | 0.106 | Up |
| MSMEG_2249 | hypothetical protein                                 | C | METABOLISM                         |          | 1.11 | 0.110 | Up |
| MSMEG_1049 | UbiE/COQ5 family methyltransferase                   | H | METABOLISM                         | RV3038C  | 1.27 | 0.117 | Up |
| manB       | phosphomannomutase                                   | G | METABOLISM                         |          | 1.02 | 0.117 | Up |
| MSMEG_4717 | carboxyl transferase domain-containing protein       | I | METABOLISM                         | Rv2502c  | 1.30 | 0.121 | Up |
| MSMEG_0127 | oxidoreductase, zinc-binding dehydrogenase           | C | METABOLISM                         | Rv0162c  | 1.09 | 0.123 | Up |
| MSMEG_4977 | 3'(2'),5'-bisphosphate nucleotidase                  | P | METABOLISM                         |          | 1.15 | 0.124 | Up |
| MSMEG_5485 | molybdopterin biosynthesis protein                   | H | METABOLISM                         | Rv0984   | 1.69 | 0.124 | Up |
| MSMEG_3786 | D-amino acid deaminase                               | E | METABOLISM                         |          | 1.93 | 0.127 | Up |
| coaD       | phosphopantetheine adenyltransferase                 | H | METABOLISM                         |          | 1.29 | 0.128 | Up |
| MSMEG_4653 | AP endonuclease, family protein in 2 superfamily     | G | METABOLISM                         |          | 1.48 | 0.131 | Up |
| ispG       | 4-hydroxy-3-methylbut-2-en-1-yl diphosphate synthase | I | METABOLISM                         |          | 1.13 | 0.133 | Up |
| MSMEG_6392 | polyketide synthase                                  | Q | METABOLISM                         | Rv3800c  | 2.06 | 0.138 | Up |
| corA       | magnesium and cobalt transporter CorA                | P | METABOLISM                         | Rv1239c  | 1.78 | 0.144 | Up |
| MSMEG_1945 | ion channel membrane protein                         | P | METABOLISM                         | RV3200C  | 1.92 | 0.145 | Up |
| MSMEG_5853 | cytochrome P450                                      | Q | METABOLISM                         |          | 1.36 | 0.147 | Up |
| MSMEG_3463 | esterase                                             | Q | METABOLISM                         | Rv3298c  | 1.31 | 0.148 | Up |
| MSMEG_4334 | flavoprotein                                         | C | METABOLISM                         | RV2250.1 | 1.38 | 0.149 | Up |
| MSMEG_3618 | hypothetical protein                                 | I | METABOLISM                         | Rv1860   | 1.67 | 0.150 | Up |
| MSMEG_2699 | hypothetical protein                                 | C | METABOLISM                         | Rv2739C  | 1.21 | 0.150 | Up |
| trpD       | anthranilate phosphoribosyltransferase               | E | METABOLISM                         | Rv2192c  | 2.04 | 0.150 | Up |
| MSMEG_0435 | allophanate hydrolase subunit 2                      | E | METABOLISM                         | RV0263C  | 1.74 | 0.154 | Up |
| MSMEG_5639 | enoyl-CoA hydratase                                  | I | METABOLISM                         | Rv0905   | 1.09 | 0.157 | Up |
| MSMEG_6802 | ABC transporter ATP-binding protein                  | G | METABOLISM                         |          | 1.05 | 0.157 | Up |
| cobM       | precorrin-4 C(11)-methyltransferase                  | H | METABOLISM                         | Rv2071c  | 1.60 | 0.161 | Up |
| carA       | carbamoyl phosphate synthase small subunit           | F | METABOLISM                         | Rv1383   | 1.32 | 0.165 | Up |
| MSMEG_2698 | hypothetical protein                                 | Q | METABOLISM                         | RV2740   | 3.23 | 0.166 | Up |
| MSMEG_1219 | ABC transporter permease                             | E | METABOLISM                         |          | 1.05 | 0.166 | Up |
| MSMEG_1292 | FAD binding domain-containing protein                | C | METABOLISM                         |          | 1.97 | 0.166 | Up |
| MSMEG_1497 | acyl-CoA dehydrogenase                               | I | METABOLISM                         | Rv0752c  | 1.12 | 0.167 | Up |

|            |                                                  |   |            |         |      |       |    |
|------------|--------------------------------------------------|---|------------|---------|------|-------|----|
| nuoD       | NADH dehydrogenase subunit D                     | C | METABOLISM | Rv3148  | 1.67 | 0.168 | Up |
| MSMEG_3471 | hypothetical protein                             | H | METABOLISM |         | 1.26 | 0.168 | Up |
| MSMEG_3634 | inosine 5-monophosphate dehydrogenase            | F | METABOLISM | RV1843C | 1.35 | 0.170 | Up |
| MSMEG_1762 | piperidine-6-carboxylic acid dehydrogenase       | C | METABOLISM | Rv3293  | 1.71 | 0.171 | Up |
| MSMEG_5857 | oxidoreductase                                   | I | METABOLISM | RV0770  | 1.20 | 0.171 | Up |
| MSMEG_0358 | ribonucleotide-diphosphate reductase subunit     | F | METABOLISM | RV0233  | 1.33 | 0.177 | Up |
| MSMEG_2490 | decarboxylase                                    | Q | METABOLISM |         | 1.57 | 0.178 | Up |
| MSMEG_5470 | molybdopterin biosynthesis protein MoeA 1        | H | METABOLISM | Rv0994  | 1.82 | 0.178 | Up |
| MSMEG_6866 | peptide ABC transporter permease                 | P | METABOLISM |         | 1.48 | 0.179 | Up |
| MSMEG_6416 | phosphoglycerate mutase                          | G | METABOLISM | RV3837C | 1.38 | 0.180 | Up |
| moaC       | molybdenum cofactor biosynthesis protein N       | H | METABOLISM | Rv0864  | 1.26 | 0.180 | Up |
| thiE       | thiamine-phosphate pyrophosphorylase             | H | METABOLISM | Rv0414c | 1.74 | 0.182 | Up |
| MSMEG_4644 | molybdopterin-guanine dinucleotide biosynthesis  | H | METABOLISM | Rv2453c | 1.24 | 0.182 | Up |
| MSMEG_6408 | acyltransferase                                  | I | METABOLISM | RV3814C | 1.67 | 0.182 | Up |
| MSMEG_6173 | morphological differentiation-associated protein | E | METABOLISM | RV3661  | 1.53 | 0.182 | Up |
| MSMEG_2680 | amino acid transporter                           | E | METABOLISM |         | 1.13 | 0.189 | Up |
| MSMEG_1905 | acyl-CoA dehydrogenase                           | I | METABOLISM |         | 1.17 | 0.195 | Up |
| MSMEG_0889 | succinate-semialdehyde dehydrogenase             | C | METABOLISM |         | 1.70 | 0.196 | Up |
| MSMEG_6473 | tetracenomycin polyketide synthesis O-methyl     | Q | METABOLISM |         | 1.37 | 0.196 | Up |
| MSMEG_6175 | 2-keto-3-deoxy-galactonokinase                   | G | METABOLISM |         | 1.17 | 0.197 | Up |
| MSMEG_3269 | sugar ABC transporter ATP-binding protein        | G | METABOLISM |         | 1.05 | 0.197 | Up |
| MSMEG_5512 | magnesium chelatase                              | H | METABOLISM | RV0958  | 1.07 | 0.198 | Up |
| MSMEG_6290 | DNA-binding protein                              | Q | METABOLISM |         | 1.30 | 0.202 | Up |
| MSMEG_2762 | inositol-1-monophosphatase                       | G | METABOLISM | Rv2701c | 1.48 | 0.206 | Up |
| MSMEG_1340 | (3R)-hydroxyacyl-ACP dehydratase subunit H       | I | METABOLISM | RV0635  | 1.11 | 0.207 | Up |
| MSMEG_2405 | MarR family transcriptional regulator            | E | METABOLISM |         | 1.94 | 0.207 | Up |
| thrC       | threonine synthase                               | E | METABOLISM | Rv1295  | 2.07 | 0.208 | Up |
| dxs        | 1-deoxy-D-xylulose-5-phosphate synthase          | I | METABOLISM |         | 1.23 | 0.208 | Up |
| ispF       | 2-C-methyl-D-erythritol 2,4-cyclodiphosphate     | I | METABOLISM | Rv3581c | 1.18 | 0.210 | Up |
| MSMEG_2070 | acyl-CoA dehydrogenase                           | I | METABOLISM |         | 1.01 | 0.212 | Up |
| MSMEG_5442 | glutamate dehydrogenase                          | E | METABOLISM |         | 1.53 | 0.214 | Up |
| MSMEG_6203 | cysteine synthase/cystathionine beta-synthase    | E | METABOLISM | RV3684  | 1.14 | 0.215 | Up |
| MSMEG_0985 | sugar transporter family protein                 | G | METABOLISM | Rv3476c | 2.39 | 0.216 | Up |
| MSMEG_0971 | hypothetical protein                             | C | METABOLISM | RV0526  | 1.60 | 0.217 | Up |
| MSMEG_2511 | siderophore utilization protein                  | P | METABOLISM | RV2895C | 1.20 | 0.218 | Up |
| MSMEG_5064 | malyl-CoA lyase                                  | G | METABOLISM |         | 1.67 | 0.223 | Up |
| MSMEG_1366 | ABC transporter ATP-binding protein              | Q | METABOLISM | RV0655  | 1.41 | 0.229 | Up |
| MSMEG_1665 | gamma-aminobutyraldehyde dehydrogenase           | C | METABOLISM |         | 1.46 | 0.231 | Up |
| pstA       | phosphate ABC transporter permease               | P | METABOLISM | Rv0930  | 1.05 | 0.232 | Up |
| xylB       | xylulokinase                                     | G | METABOLISM |         | 2.06 | 0.232 | Up |
| MSMEG_6585 | acyl-CoA dehydrogenase                           | I | METABOLISM |         | 2.76 | 0.235 | Up |
| MSMEG_6179 | acetyl-coenzyme A synthetase                     | I | METABOLISM |         | 1.06 | 0.235 | Up |
| MSMEG_5059 | ABC transporter permease                         | G | METABOLISM | Rv1237  | 1.79 | 0.235 | Up |
| pyrC       | dihydroorotase                                   | F | METABOLISM |         | 1.09 | 0.236 | Up |
| MSMEG_2875 | esterase                                         | I | METABOLISM |         | 1.48 | 0.243 | Up |
| MSMEG_5883 | 2Fe-2S-binding domain-containing protein         | C | METABOLISM |         | 1.66 | 0.244 | Up |
| MSMEG_0968 | cytochrome P450                                  | Q | METABOLISM |         | 2.08 | 0.246 | Up |
| cobA       | uroporphyrin-III C-methyltransferase             | H | METABOLISM | RV2847c | 1.24 | 0.248 | Up |
| ilvE       | branched-chain amino acid aminotransferase       | H | METABOLISM | Rv2210c | 1.43 | 0.253 | Up |
| MSMEG_3116 | inositol-1-monophosphatase                       | G | METABOLISM |         | 2.11 | 0.254 | Up |
| MSMEG_5538 | [NADP+] succinate-semialdehyde dehydrogenase     | C | METABOLISM |         | 1.12 | 0.254 | Up |
| folE       | GTP cyclohydrolase I                             | H | METABOLISM | Rv3609c | 1.75 | 0.255 | Up |
| glpK       | glycerol kinase                                  | C | METABOLISM | Rv3696c | 1.18 | 0.255 | Up |
| MSMEG_0422 | transferase                                      | G | METABOLISM | RV1998C | 1.00 | 0.259 | Up |
| cobD       | cobalamin biosynthesis protein                   | H | METABOLISM | RV2236c | 1.70 | 0.259 | Up |
| rocD       | ornithine-oxo-acid transaminase                  | E | METABOLISM | Rv2321c | 2.13 | 0.261 | Up |
| MSMEG_2111 | chorismate mutase                                | E | METABOLISM | RV1885C | 1.26 | 0.262 | Up |
| MSMEG_3532 | serine/threonine dehydratase                     | E | METABOLISM |         | 1.21 | 0.263 | Up |
| MSMEG_3568 | hypothetical protein                             | P | METABOLISM |         | 1.20 | 0.264 | Up |
| MSMEG_5678 | glyoxalase/bleomycin resistance protein/di       | E | METABOLISM |         | 1.32 | 0.264 | Up |
| MSMEG_1046 | molybdenum ABC transporter ATPase                | P | METABOLISM | RV3041C | 1.28 | 0.264 | Up |
| MSMEG_6294 | caib/baif family protein                         | C | METABOLISM |         | 1.31 | 0.264 | Up |
| MSMEG_6688 | regulatory protein                               | Q | METABOLISM |         | 1.24 | 0.265 | Up |
| MSMEG_6020 | sugar ABC transporter periplasmic protein        | G | METABOLISM |         | 1.10 | 0.267 | Up |
| MSMEG_3465 | fatty-acid-CoA ligase                            | Q | METABOLISM | Rv1925  | 1.31 | 0.269 | Up |
| MSMEG_3608 | acetyl-CoA acetyltransferase                     | I | METABOLISM | RV1867  | 1.47 | 0.272 | Up |
| MSMEG_6430 | hypothetical protein                             | C | METABOLISM |         | 1.18 | 0.273 | Up |
| MSMEG_0087 | glucitol operon repressor                        | G | METABOLISM |         | 1.76 | 0.275 | Up |
| MSMEG_2117 | beta-glucoside-specific EIi permease             | G | METABOLISM |         | 1.17 | 0.279 | Up |
| MSMEG_5884 | 3-hydroxyisobutyrate dehydrogenase               | I | METABOLISM |         | 1.50 | 0.279 | Up |
| MSMEG_4719 | peptidase S9, prolyl oligopeptidase              | E | METABOLISM |         | 1.68 | 0.280 | Up |
| MSMEG_4906 | ThiS family protein                              | H | METABOLISM |         | 1.36 | 0.281 | Up |
| MSMEG_5153 | hypothetical protein                             | I | METABOLISM | RV1157C | 1.56 | 0.282 | Up |
| MSMEG_1475 | hypothetical protein                             | C | METABOLISM |         | 1.32 | 0.285 | Up |
| MSMEG_0098 | methyltransferase                                | H | METABOLISM | RV0839  | 1.18 | 0.288 | Up |
| lysA       | diaminopimelate decarboxylase                    | E | METABOLISM | Rv1293  | 1.30 | 0.291 | Up |
| MSMEG_4641 | salicylate hydroxylase                           | C | METABOLISM |         | 1.19 | 0.292 | Up |
| MSMEG_0634 | PAP2 superfamily protein                         | I | METABOLISM |         | 1.66 | 0.301 | Up |
| MSMEG_4301 | fatty-acid-CoA ligase                            | Q | METABOLISM | RV0308  | 1.14 | 0.301 | Up |
| MSMEG_1433 | thioesterase                                     | Q | METABOLISM |         | 1.06 | 0.301 | Up |
| MSMEG_0436 | allophanate hydrolase subunit 1                  | E | METABOLISM | RV0264C | 1.36 | 0.305 | Up |
| MSMEG_0970 | phosphoglycerate mutase                          | G | METABOLISM | RV0525  | 2.28 | 0.317 | Up |
| MSMEG_3668 | acyl-CoA dehydrogenase                           | I | METABOLISM |         | 2.15 | 0.317 | Up |
| MSMEG_3852 | aliphatic sulfonate binding protein              | P | METABOLISM |         | 2.30 | 0.317 | Up |
| malQ       | 4-alpha-glucanotransferase                       | G | METABOLISM | Rv1781c | 1.73 | 0.318 | Up |
| MSMEG_3598 | periplasmic sugar-binding proteins               | G | METABOLISM |         | 1.34 | 0.318 | Up |
| MSMEG_5339 | nitrile hydratase regulator1                     | E | METABOLISM |         | 1.16 | 0.318 | Up |
| MSMEG_1573 | carbohydrate kinase                              | G | METABOLISM | RV3433C | 1.76 | 0.318 | Up |
| MSMEG_2769 | TrkB protein                                     | P | METABOLISM |         | 1.14 | 0.318 | Up |
| MSMEG_1432 | acetylcholinesterase                             | I | METABOLISM |         | 1.68 | 0.319 | Up |
| MSMEG_2017 | MerR family transcriptional regulator            | H | METABOLISM |         | 1.50 | 0.319 | Up |
| serB       | phosphoserine phosphatase                        | E | METABOLISM | Rv3042c | 1.56 | 0.324 | Up |
| MSMEG_0316 | NagC regulator                                   | G | METABOLISM |         | 1.47 | 0.324 | Up |
| MSMEG_0991 | NAD-dependent epimerase/dehydratase              | G | METABOLISM | RV0536  | 1.79 | 0.324 | Up |
| MSMEG_6409 | acyltransferase                                  | I | METABOLISM | RV3816C | 1.11 | 0.325 | Up |
| thiS       | sulfur carrier protein ThiS                      | H | METABOLISM | Rv0416  | 1.11 | 0.329 | Up |
| MSMEG_5589 | manganese transporter MntH                       | P | METABOLISM | RV0924c | 1.75 | 0.330 | Up |
| MSMEG_5220 | esterase/lipase/thioesterase                     | I | METABOLISM |         | 1.50 | 0.337 | Up |
| MSMEG_6320 | diol dehydrase subunit gamma                     | Q | METABOLISM |         | 1.66 | 0.340 | Up |
| MSMEG_3059 | esterase                                         | I | METABOLISM | Rv1400c | 1.57 | 0.340 | Up |
| MSMEG_2353 | hypothetical protein                             | G | METABOLISM |         | 1.87 | 0.341 | Up |
| MSMEG_5199 | acyl-CoA dehydrogenase                           | I | METABOLISM |         | 1.01 | 0.341 | Up |
| MSMEG_0319 | acyltransferase                                  | I | METABOLISM | RV0228  | 1.19 | 0.343 | Up |
| MSMEG_4524 | salicylate synthase MbtI                         | H | METABOLISM | Rv2386c | 2.02 | 0.346 | Up |
| MSMEG_1546 | coenzyme B12-dependent glycerol dehydrogenase    | Q | METABOLISM |         | 1.42 | 0.347 | Up |
| gabD2      | succinate-semialdehyde dehydrogenase             | C | METABOLISM | Rv1731  | 2.06 | 0.348 | Up |
| MSMEG_4873 | enoyl-CoA hydratase/isomerase                    | I | METABOLISM |         | 1.77 | 0.348 | Up |
| cysM       | cysteine synthase B                              | E | METABOLISM | Rv1336  | 2.25 | 0.349 | Up |

|            |                                                             |   |            |         |      |       |    |
|------------|-------------------------------------------------------------|---|------------|---------|------|-------|----|
| MSMEG_6072 | citrate transporter                                         | P | METABOLISM | Rv3578  | 1.78 | 0.352 | Up |
| MSMEG_0862 | molybdopterin biosynthesis protein MoeA                     | H | METABOLISM | Rv0866  | 1.05 | 0.357 | Up |
| aroE       | shikimate 5-dehydrogenase                                   | E | METABOLISM | Rv2552c | 1.39 | 0.362 | Up |
| panC       | pantoate-beta-alanine ligase                                | H | METABOLISM | Rv3602c | 1.34 | 0.363 | Up |
| argC       | N-acetyl-gamma-glutamyl-phosphate reductase                 | E | METABOLISM | Rv1652  | 1.44 | 0.365 | Up |
| MSMEG_6582 | pyridine nucleotide-disulfide oxidoreductase                | C | METABOLISM |         | 2.04 | 0.366 | Up |
| ureB       | urease subunit beta                                         | E | METABOLISM | Rv1849  | 1.24 | 0.368 | Up |
| MSMEG_4962 | hypothetical protein                                        | C | METABOLISM | Rv1751  | 1.45 | 0.370 | Up |
| MSMEG_0871 | aldehyde or xanthine dehydrogenase, molyb                   | C | METABOLISM |         | 1.23 | 0.371 | Up |
| MSMEG_2501 | nitrate/sulfonate/bicarbonate ABC transporter               | P | METABOLISM |         | 1.03 | 0.371 | Up |
| MSMEG_0361 | glycosyl hydrolase                                          | G | METABOLISM | Rv0237  | 1.29 | 0.371 | Up |
| MSMEG_5533 | 4Fe-4S ferredoxin                                           | C | METABOLISM |         | 1.71 | 0.372 | Up |
| psd        | phosphatidylserine decarboxylase                            | I | METABOLISM | Rv0437c | 1.68 | 0.372 | Up |
| MSMEG_3203 | transporter LysE family protein                             | E | METABOLISM |         | 1.88 | 0.373 | Up |
| aroC       | chorismate synthase                                         | E | METABOLISM |         | 1.11 | 0.374 | Up |
| hisF       | imidazole glycerol phosphate synthase subunit               | E | METABOLISM | Rv1605  | 1.42 | 0.375 | Up |
| MSMEG_6520 | orotate phosphoribosyltransferase                           | F | METABOLISM | Rv0382c | 1.33 | 0.376 | Up |
| MSMEG_2122 | dihydroxyacetone kinase subunit DhaL                        | G | METABOLISM |         | 1.69 | 0.380 | Up |
| MSMEG_2357 | cysteine desulfurase                                        | E | METABOLISM | Rv3025c | 1.69 | 0.386 | Up |
| MSMEG_0935 | 2,3-bisphosphoglycerate-independent phosphoglycerate kinase | G | METABOLISM |         | 1.21 | 0.386 | Up |
| MSMEG_5491 | acyl-CoA dehydrogenase                                      | I | METABOLISM | Rv0975c | 1.21 | 0.390 | Up |
| thiO       | glycine oxidase ThiO                                        | E | METABOLISM | Rv0415  | 1.51 | 0.395 | Up |
| guaA       | GMP synthase                                                | F | METABOLISM |         | 1.09 | 0.396 | Up |
| MSMEG_5251 | hypothetical protein                                        | P | METABOLISM |         | 1.53 | 0.397 | Up |
| MSMEG_5994 | acyl-CoA dehydrogenase                                      | I | METABOLISM | Rv3544c | 1.47 | 0.398 | Up |
| MSMEG_5640 | amylase-like alpha-1,6-glucosidase                          | G | METABOLISM |         | 1.59 | 0.401 | Up |
| MSMEG_1374 | ribose ABC transporter periplasmic binding protein          | G | METABOLISM |         | 1.74 | 0.404 | Up |
| MSMEG_6584 | acyl-CoA dehydrogenase                                      | I | METABOLISM |         | 1.33 | 0.404 | Up |
| MSMEG_3057 | metal ABC transporter permease                              | P | METABOLISM |         | 1.23 | 0.406 | Up |
| MSMEG_6231 | hypothetical protein                                        | H | METABOLISM | RV1978  | 1.53 | 0.408 | Up |
| MSMEG_4305 | bifunctional RNase H/acid phosphatase                       | G | METABOLISM | RV2228C | 1.94 | 0.411 | Up |
| MSMEG_4984 | hypothetical protein                                        | Q | METABOLISM | RV1532C | 1.39 | 0.412 | Up |
| MSMEG_0357 | transmembrane transporter                                   | G | METABOLISM |         | 1.03 | 0.413 | Up |
| MSMEG_2359 | methionine synthase, vitamin-B12 independent                | E | METABOLISM | RV3015C | 1.17 | 0.414 | Up |
| uppS       | UDP pyrophosphatase                                         | I | METABOLISM | RV1086  | 1.40 | 0.421 | Up |
| MSMEG_1940 | alpha/beta hydrolase                                        | I | METABOLISM | Rv3203  | 1.71 | 0.423 | Up |
| MSMEG_1572 | GntR family transcriptional regulator                       | E | METABOLISM |         | 1.58 | 0.426 | Up |
| MSMEG_0232 | sugar transporter family protein                            | G | METABOLISM | RV0191  | 1.42 | 0.430 | Up |
| MSMEG_2493 | aminotransferase, class I and II family protein             | E | METABOLISM |         | 1.73 | 0.431 | Up |
| MSMEG_4299 | enoyl-CoA hydratase/isomerase                               | I | METABOLISM |         | 1.89 | 0.431 | Up |
| MSMEG_5693 | transporter major facilitator family protein                | G | METABOLISM | RV0876C | 1.80 | 0.434 | Up |
| MSMEG_3506 | amino acid decarboxylase                                    | E | METABOLISM |         | 1.42 | 0.436 | Up |
| MSMEG_2426 | nitrogen regulatory protein P-II                            | E | METABOLISM | Rv2919c | 1.85 | 0.442 | Up |
| MSMEG_5795 | 4-amino-4-deoxychorismate lyase                             | H | METABOLISM | RV0812  | 1.05 | 0.444 | Up |
| MSMEG_1378 | 1-phosphofructokinase                                       | G | METABOLISM |         | 2.34 | 0.445 | Up |
| MSMEG_5413 | exopolyphosphatase                                          | P | METABOLISM | RV1026  | 1.52 | 0.446 | Up |
| MSMEG_6437 | copper resistance protein D                                 | P | METABOLISM |         | 1.79 | 0.450 | Up |
| MSMEG_3524 | linalool 8-monoxygenase                                     | Q | METABOLISM |         | 1.05 | 0.451 | Up |
| cobH       | precoir-8X methylmutase                                     | H | METABOLISM |         | 1.47 | 0.454 | Up |
| MSMEG_6519 | pyridoxamine 5'-phosphate oxidase                           | P | METABOLISM |         | 1.47 | 0.454 | Up |
| moaE       | molybdopterin converting factor subunit 2                   | H | METABOLISM | Rv0866  | 1.21 | 0.455 | Up |
| MSMEG_4976 | isochorismatase hydrolase                                   | Q | METABOLISM |         | 1.18 | 0.457 | Up |
| MSMEG_5848 | amino acid permease                                         | E | METABOLISM |         | 1.42 | 0.457 | Up |
| hemL       | glutamate-1-semialdehyde aminotransferase                   | H | METABOLISM | RV0524  | 1.80 | 0.459 | Up |
| MSMEG_2787 | hypothetical protein                                        | H | METABOLISM | Rv2671  | 1.59 | 0.462 | Up |
| MSMEG_4250 | membrane transport ATPase                                   | P | METABOLISM | RV2184C | 1.10 | 0.463 | Up |
| MSMEG_1574 | glutamate decarboxylase                                     | E | METABOLISM | RV3432c | 1.12 | 0.467 | Up |
| MSMEG_4896 | fatty-acid-CoA ligase                                       | Q | METABOLISM |         | 1.53 | 0.467 | Up |
| MSMEG_1069 | amino acid permease                                         | E | METABOLISM |         | 1.07 | 0.469 | Up |
| MSMEG_4469 | cobalt transporter                                          | P | METABOLISM | RV2325C | 1.94 | 0.469 | Up |
| cobG       | precoir-3B synthase                                         | P | METABOLISM | Rv2064  | 1.09 | 0.470 | Up |
| MSMEG_3873 | cobalamin biosynthesis protein cobII                        | H | METABOLISM |         | 1.24 | 0.473 | Up |
| MSMEG_0580 | hypothetical protein                                        | I | METABOLISM |         | 1.55 | 0.474 | Up |
| MSMEG_4545 | extracellular solute-binding protein                        | E | METABOLISM | Rv3666c | 1.26 | 0.479 | Up |
| MSMEG_3007 | succinate-semialdehyde dehydrogenase                        | C | METABOLISM |         | 1.76 | 0.479 | Up |
| MSMEG_1589 | hypothetical protein                                        | C | METABOLISM |         | 1.03 | 0.481 | Up |
| cobB       | cobyrinic acid, alpha, gamma-diamide synthase               | H | METABOLISM | Rv2848c | 1.14 | 0.486 | Up |
| ptsI       | phosphoenolpyruvate-protein phosphotransferase              | G | METABOLISM |         | 1.40 | 0.486 | Up |
| pdxH       | pyridoxamine 5'-phosphate oxidase                           | H | METABOLISM | Rv2607  | 1.07 | 0.488 | Up |
| MSMEG_3671 | integral membrane protein                                   | G | METABOLISM |         | 1.02 | 0.490 | Up |
| MSMEG_6095 | D-amino acid deaminase                                      | E | METABOLISM |         | 1.32 | 0.493 | Up |
| MSMEG_4467 | ABC transporter permease                                    | G | METABOLISM | Rv2317  | 1.35 | 0.493 | Up |
| MSMEG_1764 | L-lysine aminotransferase                                   | E | METABOLISM | Rv3290c | 1.04 | 0.500 | Up |
| MSMEG_6230 | acyltransferase                                             | I | METABOLISM |         | 1.81 | 0.502 | Up |
| MSMEG_1491 | histidinol-phosphate aminotransferase 2                     | E | METABOLISM |         | 1.06 | 0.503 | Up |
| MSMEG_1371 | hypothetical protein                                        | G | METABOLISM |         | 1.44 | 0.504 | Up |
| mdcB       | triphosphoribosyl-dephospho-CoA synthase                    | H | METABOLISM |         | 1.27 | 0.505 | Up |
| rpe        | ribose-phosphate 3-epimerase                                | G | METABOLISM | Rv1408  | 1.41 | 0.507 | Up |
| edd        | phosphogluconate dehydratase                                | G | METABOLISM |         | 1.30 | 0.507 | Up |
| MSMEG_0318 | AMP-dependent synthetase/ligase                             | Q | METABOLISM |         | 1.58 | 0.508 | Up |
| MSMEG_3571 | thioesterase                                                | Q | METABOLISM |         | 1.57 | 0.508 | Up |
| MSMEG_0812 | amino acid transporter                                      | E | METABOLISM |         | 1.19 | 0.513 | Up |
| MSMEG_2470 | acyl-CoA thioesterase                                       | I | METABOLISM |         | 1.42 | 0.515 | Up |
| MSMEG_3783 | acyl-CoA dehydrogenase                                      | I | METABOLISM | Rv2789c | 1.48 | 0.517 | Up |
| MSMEG_3693 | cytochrome P450 monooxygenase                               | Q | METABOLISM |         | 1.24 | 0.517 | Up |
| MSMEG_4348 | hypothetical protein                                        | H | METABOLISM | Rv3509c | 1.38 | 0.526 | Up |
| MSMEG_5908 | acyl-CoA synthetase                                         | Q | METABOLISM | Rv3506  | 1.53 | 0.533 | Up |
| MSMEG_0503 | DeoR family transcriptional regulator                       | G | METABOLISM |         | 1.14 | 0.534 | Up |
| MSMEG_2130 | acyl-CoA dehydrogenase                                      | I | METABOLISM |         | 1.09 | 0.543 | Up |
| folB       | dihydroneopterin aldolase                                   | H | METABOLISM | Rv3607c | 1.08 | 0.544 | Up |
| MSMEG_0932 | ROK family protein                                          | G | METABOLISM | RV0485  | 1.09 | 0.546 | Up |
| bioB       | biotin synthase                                             | H | METABOLISM | Rv1589  | 1.66 | 0.548 | Up |
| MSMEG_2116 | PTS system, glucose-specific IIBC component                 | G | METABOLISM |         | 1.54 | 0.549 | Up |
| MSMEG_5674 | membrane transporter                                        | G | METABOLISM |         | 1.27 | 0.553 | Up |
| pyrD       | dihydroorotate dehydrogenase 2                              | F | METABOLISM | Rv2139  | 1.26 | 0.555 | Up |
| bioA       | adenosylmethionine-8-amino-7-oxononanoate synthase          | C | METABOLISM | Rv1568  | 1.26 | 0.555 | Up |
| MSMEG_5045 | D-2-hydroxyacid dehydrogenase                               | H | METABOLISM | RV0161  | 1.45 | 0.558 | Up |
| MSMEG_2431 | amidohydrolase                                              | Q | METABOLISM | RV2915C | 1.09 | 0.558 | Up |
| MSMEG_0470 | para-nitrobenzyl esterase                                   | I | METABOLISM |         | 1.11 | 0.562 | Up |
| MSMEG_6225 | proton antiporter efflux pump                               | G | METABOLISM |         | 1.74 | 0.562 | Up |
| cobT       | nicotinate-nucleotide-dimethylbenzimidazole synthase        | H | METABOLISM | Rv2207  | 1.84 | 0.565 | Up |
| MSMEG_1463 | gamma-glutamyltranspeptidase                                | E | METABOLISM |         | 1.05 | 0.570 | Up |
| MSMEG_1581 | hypothetical protein                                        | Q | METABOLISM |         | 1.78 | 0.570 | Up |
| cobN       | cobaltochelate subunit CobN                                 | H | METABOLISM | Rv2062c | 1.10 | 0.571 | Up |
| MSMEG_1899 | succinyl-CoA:3-ketoacid-coenzyme A transferase              | I | METABOLISM | Rv2503c | 1.63 | 0.577 | Up |
| MSMEG_2121 | multiphosphoryl transfer protein (MTP)                      | G | METABOLISM |         | 1.28 | 0.580 | Up |
| MSMEG_1906 | toluate 1,2-dioxygenase electron transfer cofactor          | C | METABOLISM |         | 1.13 | 0.589 | Up |
| MSMEG_0810 | pyrimidine permease RutG                                    | F | METABOLISM |         | 1.61 | 0.589 | Up |

|            |                                               |   |                      |         |      |       |    |
|------------|-----------------------------------------------|---|----------------------|---------|------|-------|----|
| MSMEG_0276 | aldehyde-alcohol dehydrogenase                | C | METABOLISM           |         | 1.42 | 0.593 | Up |
| MSMEG_3870 | alpha-ketoglutarate-dependent taurine diox    | Q | METABOLISM           |         | 1.58 | 0.593 | Up |
| MSMEG_1376 | xylulose kinase                               | G | METABOLISM           | Rv0729  | 1.07 | 0.595 | Up |
| MSMEG_2492 | D-lactate dehydrogenase                       | C | METABOLISM           |         | 1.05 | 0.599 | Up |
| MSMEG_3670 | transporter small multidrug resistance (SMR)  | P | METABOLISM           |         | 1.02 | 0.606 | Up |
| MSMEG_1701 | purine nucleoside phosphorylase               | F | METABOLISM           |         | 1.04 | 0.608 | Up |
| MSMEG_4511 | linear gramicidin synthetase subunit B        | Q | METABOLISM           | Rv2380c | 1.04 | 0.610 | Up |
| MSMEG_2738 | biotin sulfoxide reductase                    | C | METABOLISM           | Rv1442  | 1.06 | 0.610 | Up |
| MSMEG_1214 | oxidoreductase                                | G | METABOLISM           |         | 1.03 | 0.617 | Up |
| MSMEG_3058 | lipoprotein, nlpA family protein              | P | METABOLISM           |         | 1.08 | 0.624 | Up |
| mdcH       | malonate decarboxylase subunit epsilon        | I | METABOLISM           |         | 1.19 | 0.633 | Up |
| MSMEG_1903 | caib/baif family protein                      | C | METABOLISM           | RV1866  | 1.02 | 0.639 | Up |
| MSMEG_5684 | phosphoserine aminotransferase                | E | METABOLISM           | Rv0884c | 1.22 | 0.652 | Up |
| purN       | phosphoribosylglycinamide formyltransferase   | F | METABOLISM           | Rv0956  | 1.21 | 0.669 | Up |
| MSMEG_6399 | antigen 85-C                                  | R | POORLY CHARACTERIZED |         | 1.75 | 0.000 | Up |
| MSMEG_1684 | hypothetical protein                          | R | POORLY CHARACTERIZED | RV3311  | 1.69 | 0.008 | Up |
| MSMEG_1563 | short-chain dehydrogenase/reductase SDR       | R | POORLY CHARACTERIZED |         | 1.24 | 0.013 | Up |
| fbfC       | FO synthase                                   | R | POORLY CHARACTERIZED |         | 1.28 | 0.017 | Up |
| MSMEG_1932 | MmpS3 protein                                 | S | POORLY CHARACTERIZED | RV3209  | 2.05 | 0.025 | Up |
| MSMEG_2940 | hypothetical protein                          | S | POORLY CHARACTERIZED | RV2603C | 1.68 | 0.028 | Up |
| MSMEG_0657 | Rieske (2Fe-2S) domain-containing protein     | R | POORLY CHARACTERIZED | RV3161C | 1.05 | 0.030 | Up |
| murQ       | N-acetylmuramic acid 6-phosphate etherase     | R | POORLY CHARACTERIZED |         | 1.23 | 0.034 | Up |
| MSMEG_0101 | hypothetical protein                          | S | POORLY CHARACTERIZED | RV1890C | 1.28 | 0.037 | Up |
| MSMEG_6126 | D-isomer specific 2-hydroxyacid dehydrogen    | R | POORLY CHARACTERIZED |         | 1.13 | 0.039 | Up |
| MSMEG_1638 | roadblock/LC7 domain-contain protein          | R | POORLY CHARACTERIZED | RV3364C | 1.31 | 0.041 | Up |
| MSMEG_1382 | MmpL5 protein                                 | R | POORLY CHARACTERIZED |         | 1.48 | 0.045 | Up |
| MSMEG_4470 | ABC transporter                               | R | POORLY CHARACTERIZED | RV2326C | 2.39 | 0.047 | Up |
| MSMEG_0527 | 2-hydroxycyclohexanecarboxyl-CoA dehydrog     | R | POORLY CHARACTERIZED |         | 1.10 | 0.052 | Up |
| MSMEG_5234 | short-chain dehydrogenase/reductase SDR       | R | POORLY CHARACTERIZED |         | 1.68 | 0.053 | Up |
| MSMEG_0332 | 2-nitropropane dioxigenase                    | R | POORLY CHARACTERIZED |         | 1.29 | 0.054 | Up |
| MSMEG_0141 | mce associated transmembrane protein          | S | POORLY CHARACTERIZED | RV0176  | 1.09 | 0.055 | Up |
| MSMEG_1954 | ABC transporter                               | R | POORLY CHARACTERIZED | RV3197  | 1.60 | 0.058 | Up |
| trmB       | tRNA (guanine-N(7))-methyltransferase         | R | POORLY CHARACTERIZED |         | 1.09 | 0.058 | Up |
| MSMEG_3528 | Erk/Ybis/Ycf5/YnhG family protein             | S | POORLY CHARACTERIZED | RV0116C | 1.08 | 0.065 | Up |
| MSMEG_2159 | hypothetical protein                          | S | POORLY CHARACTERIZED |         | 1.54 | 0.066 | Up |
| MSMEG_2157 | hypothetical protein                          | S | POORLY CHARACTERIZED |         | 1.73 | 0.068 | Up |
| MSMEG_0399 | hypothetical protein                          | S | POORLY CHARACTERIZED | Rv2377c | 2.16 | 0.069 | Up |
| MSMEG_3781 | hypothetical protein                          | S | POORLY CHARACTERIZED | RV1645C | 1.49 | 0.074 | Up |
| MSMEG_1829 | F420-0-gamma-glutamyl ligase                  | S | POORLY CHARACTERIZED |         | 1.80 | 0.075 | Up |
| MSMEG_1425 | creatininase subfamily protein                | R | POORLY CHARACTERIZED | RV0695  | 1.04 | 0.076 | Up |
| MSMEG_5466 | oxidoreductase                                | R | POORLY CHARACTERIZED |         | 1.24 | 0.079 | Up |
| MSMEG_5258 | steroid delta-isomerase                       | R | POORLY CHARACTERIZED |         | 1.25 | 0.081 | Up |
| MSMEG_0863 | short chain dehydrogenase                     | R | POORLY CHARACTERIZED | RV0439C | 1.63 | 0.082 | Up |
| MSMEG_5183 | 3-hydroxyacyl-CoA dehydrogenase               | R | POORLY CHARACTERIZED | RV1144  | 1.21 | 0.084 | Up |
| MSMEG_4685 | oxidoreductase                                | R | POORLY CHARACTERIZED |         | 2.97 | 0.086 | Up |
| MSMEG_2361 | phosphoribosylglycinamide formyltransferase   | S | POORLY CHARACTERIZED |         | 1.64 | 0.089 | Up |
| MSMEG_3127 | hypothetical protein                          | R | POORLY CHARACTERIZED | RV1466  | 1.74 | 0.091 | Up |
| MSMEG_4220 | hypothetical protein                          | R | POORLY CHARACTERIZED | RV2148C | 1.60 | 0.091 | Up |
| MSMEG_1891 | hypothetical protein                          | S | POORLY CHARACTERIZED | RV3226C | 1.56 | 0.093 | Up |
| MSMEG_5762 | zinc-binding oxidoreductase                   | R | POORLY CHARACTERIZED |         | 1.08 | 0.094 | Up |
| MSMEG_1210 | hypothetical protein                          | S | POORLY CHARACTERIZED |         | 1.47 | 0.095 | Up |
| MSMEG_6398 | antigen 85-A                                  | R | POORLY CHARACTERIZED | RV1886c | 1.78 | 0.096 | Up |
| MSMEG_4975 | flavin-nucleotide-binding protein             | R | POORLY CHARACTERIZED |         | 1.48 | 0.096 | Up |
| MSMEG_3616 | integral membrane protein                     | S | POORLY CHARACTERIZED | RV1861  | 1.70 | 0.102 | Up |
| MSMEG_5511 | von Willebrand factor A                       | R | POORLY CHARACTERIZED | RV0959  | 1.82 | 0.104 | Up |
| MSMEG_4284 | hypothetical protein                          | R | POORLY CHARACTERIZED | RV2216  | 1.20 | 0.107 | Up |
| MSMEG_5210 | hydrolase                                     | R | POORLY CHARACTERIZED |         | 1.00 | 0.110 | Up |
| MSMEG_0836 | carboxylate-amine ligase                      | S | POORLY CHARACTERIZED | RV0433  | 1.48 | 0.111 | Up |
| MSMEG_4632 | saccharopine dehydrogenase                    | S | POORLY CHARACTERIZED | RV2449C | 1.11 | 0.113 | Up |
| clpS       | ATP-dependent Clp protease adaptor protein    | S | POORLY CHARACTERIZED |         | 2.19 | 0.115 | Up |
| MSMEG_2402 | dihydroxyacetone kinase                       | R | POORLY CHARACTERIZED | RV2974C | 1.86 | 0.127 | Up |
| MSMEG_6662 | short chain dehydrogenase                     | R | POORLY CHARACTERIZED |         | 1.52 | 0.128 | Up |
| MSMEG_5204 | oxidoreductase, short chain dehydrogenase/    | R | POORLY CHARACTERIZED |         | 1.21 | 0.130 | Up |
| MSMEG_6796 | hypothetical protein                          | R | POORLY CHARACTERIZED |         | 1.13 | 0.133 | Up |
| MSMEG_5858 | short chain dehydrogenase                     | R | POORLY CHARACTERIZED | RV0769  | 1.41 | 0.151 | Up |
| MSMEG_0216 | 3-hydroxyacyl-CoA dehydrogenase               | R | POORLY CHARACTERIZED |         | 1.79 | 0.155 | Up |
| MSMEG_4308 | 5'-nucleotidase                               | R | POORLY CHARACTERIZED | RV2232  | 1.20 | 0.158 | Up |
| MSMEG_3534 | 4-hydroxybenzoyl-CoA thioesterase             | R | POORLY CHARACTERIZED |         | 1.68 | 0.158 | Up |
| MSMEG_2642 | hypothetical protein                          | S | POORLY CHARACTERIZED |         | 1.55 | 0.158 | Up |
| MSMEG_1760 | short-chain dehydrogenase/reductase SDR       | R | POORLY CHARACTERIZED | RV0851C | 1.82 | 0.161 | Up |
| MSMEG_5430 | retinol dehydrogenase 13                      | R | POORLY CHARACTERIZED |         | 1.61 | 0.172 | Up |
| MSMEG_2942 | glyoxalase/bleomycin resistance protein/dic   | R | POORLY CHARACTERIZED |         | 1.69 | 0.176 | Up |
| MSMEG_3027 | hypothetical protein                          | R | POORLY CHARACTERIZED | RV2553C | 1.24 | 0.178 | Up |
| MSMEG_3515 | 3-alpha-(or 20-beta)-hydroxysteroid dehydro   | R | POORLY CHARACTERIZED | Rv2002  | 1.32 | 0.181 | Up |
| MSMEG_3570 | hypothetical protein                          | S | POORLY CHARACTERIZED |         | 1.84 | 0.182 | Up |
| MSMEG_6098 | chalcone/stilbene synthase                    | S | POORLY CHARACTERIZED | RV3603C | 1.09 | 0.182 | Up |
| MSMEG_6592 | short-chain dehydrogenase/reductase SDR       | R | POORLY CHARACTERIZED |         | 1.14 | 0.185 | Up |
| MSMEG_0737 | dehydrogenase                                 | R | POORLY CHARACTERIZED | RV1544  | 1.08 | 0.185 | Up |
| MSMEG_4496 | metalloprotease                               | R | POORLY CHARACTERIZED | RV2367C | 1.03 | 0.186 | Up |
| MSMEG_5761 | cupin                                         | S | POORLY CHARACTERIZED |         | 1.21 | 0.187 | Up |
| MSMEG_5862 | short chain dehydrogenase                     | R | POORLY CHARACTERIZED | RV0765C | 1.09 | 0.189 | Up |
| MSMEG_6583 | antigen 85-C                                  | R | POORLY CHARACTERIZED |         | 2.31 | 0.192 | Up |
| MSMEG_5644 | membrane protein                              | S | POORLY CHARACTERIZED | RV0180C | 1.79 | 0.196 | Up |
| MSMEG_0250 | membrane protein, Mmpl family protein         | R | POORLY CHARACTERIZED | Rv0206c | 1.40 | 0.197 | Up |
| MSMEG_1379 | hypothetical protein                          | R | POORLY CHARACTERIZED |         | 1.04 | 0.202 | Up |
| MSMEG_3508 | alpha/beta hydrolase                          | R | POORLY CHARACTERIZED | RV1191  | 1.01 | 0.205 | Up |
| MSMEG_1149 | hypothetical protein                          | S | POORLY CHARACTERIZED | RV2390C | 1.03 | 0.205 | Up |
| MSMEG_3843 | hypothetical protein                          | R | POORLY CHARACTERIZED | RV1628C | 1.61 | 0.210 | Up |
| MSMEG_3825 | 3-oxoacyl-ACP reductase                       | R | POORLY CHARACTERIZED |         | 1.02 | 0.210 | Up |
| MSMEG_4382 | dehydrogenase/reductase SDR family protein    | R | POORLY CHARACTERIZED |         | 1.31 | 0.218 | Up |
| MSMEG_0321 | transcriptional regulator                     | R | POORLY CHARACTERIZED |         | 1.68 | 0.221 | Up |
| MSMEG_1702 | amidohydrolase                                | R | POORLY CHARACTERIZED | Rv3306c | 1.03 | 0.227 | Up |
| MSMEG_3817 | hypothetical protein                          | S | POORLY CHARACTERIZED | RV1632C | 1.11 | 0.229 | Up |
| MSMEG_4208 | integral membrane protein                     | S | POORLY CHARACTERIZED |         | 1.30 | 0.229 | Up |
| obgE       | GTPase ObgE                                   | R | POORLY CHARACTERIZED |         | 1.09 | 0.231 | Up |
| MSMEG_2581 | acetyltransferase                             | R | POORLY CHARACTERIZED | RV2867C | 1.34 | 0.232 | Up |
| MSMEG_4463 | CalR5 protein                                 | R | POORLY CHARACTERIZED | RV2314C | 1.42 | 0.243 | Up |
| MSMEG_0066 | early secretory antigenic target, 6 kDa       | S | POORLY CHARACTERIZED | Rv3875  | 1.56 | 0.243 | Up |
| MSMEG_5885 | short chain dehydrogenase                     | R | POORLY CHARACTERIZED | RV3485C | 1.09 | 0.248 | Up |
| MSMEG_2033 | oxidoreductase, zinc-binding dehydrogenase    | R | POORLY CHARACTERIZED | RV3141  | 2.04 | 0.252 | Up |
| MSMEG_3580 | antigen 85-C                                  | R | POORLY CHARACTERIZED | Rv0129c | 2.63 | 0.252 | Up |
| MSMEG_5681 | ferredoxin/ferredoxin-NADP reductase          | R | POORLY CHARACTERIZED | RV0886  | 1.56 | 0.255 | Up |
| ahpD       | alkylhydroperoxidase                          | S | POORLY CHARACTERIZED | Rv2429  | 1.43 | 0.257 | Up |
| MSMEG_4221 | hypothetical protein                          | S | POORLY CHARACTERIZED | RV2149C | 1.20 | 0.260 | Up |
| MSMEG_2349 | glycosyl hydrolase family protein             | S | POORLY CHARACTERIZED | RV3031  | 1.02 | 0.261 | Up |
| MSMEG_4477 | hydrolase, alpha/beta hydrolase fold family p | R | POORLY CHARACTERIZED | Rv1900c | 2.14 | 0.272 | Up |
| MSMEG_4464 | modulator of DNA gyrase                       | R | POORLY CHARACTERIZED | RV2315C | 1.16 | 0.273 | Up |
| MSMEG_0231 | hypothetical protein                          | S | POORLY CHARACTERIZED | RV1898  | 2.23 | 0.275 | Up |

|            |                                              |   |                      |         |      |       |    |
|------------|----------------------------------------------|---|----------------------|---------|------|-------|----|
| MSMEG_3254 | RDD family protein                           | S | POORLY CHARACTERIZED |         | 1.39 | 0.276 | Up |
| MSMEG_0923 | hypothetical protein                         | S | POORLY CHARACTERIZED | RV0479C | 1.47 | 0.276 | Up |
| MSMEG_3581 | FabG protein                                 | R | POORLY CHARACTERIZED |         | 1.50 | 0.281 | Up |
| MSMEG_4219 | hypothetical protein                         | S | POORLY CHARACTERIZED |         | 1.01 | 0.286 | Up |
| MSMEG_0901 | hypothetical protein                         | S | POORLY CHARACTERIZED | RV0459  | 1.15 | 0.290 | Up |
| MSMEG_3607 | short chain dehydrogenase                    | R | POORLY CHARACTERIZED |         | 1.89 | 0.291 | Up |
| MSMEG_6190 | metallo-beta-lactamase                       | R | POORLY CHARACTERIZED | RV3677C | 1.25 | 0.293 | Up |
| MSMEG_6645 | 2-methylcitrate dehydratase                  | R | POORLY CHARACTERIZED | RV1130  | 1.02 | 0.299 | Up |
| MSMEG_4702 | ABC transporter permease                     | S | POORLY CHARACTERIZED | RV0102  | 1.18 | 0.304 | Up |
| MSMEG_6929 | hypothetical protein                         | R | POORLY CHARACTERIZED | RV3910  | 1.02 | 0.310 | Up |
| MSMEG_5547 | hypothetical protein                         | S | POORLY CHARACTERIZED |         | 1.70 | 0.316 | Up |
| MSMEG_6221 | integral membrane protein                    | S | POORLY CHARACTERIZED | RV3694C | 1.94 | 0.316 | Up |
| MSMEG_5850 | TetR family transcriptional regulator        | S | POORLY CHARACTERIZED | RV0775  | 1.09 | 0.317 | Up |
| MSMEG_5073 | O-methyltransferase, family protein 3        | R | POORLY CHARACTERIZED | RV1220C | 1.51 | 0.317 | Up |
| MSMEG_3081 | hypothetical protein                         | S | POORLY CHARACTERIZED | Rv1423  | 1.50 | 0.322 | Up |
| MSMEG_1577 | hypothetical protein                         | R | POORLY CHARACTERIZED | RV3422C | 1.47 | 0.323 | Up |
| MSMEG_3484 | cupin                                        | S | POORLY CHARACTERIZED |         | 1.17 | 0.326 | Up |
| MSMEG_3241 | hypothetical protein                         | S | POORLY CHARACTERIZED |         | 2.75 | 0.327 | Up |
| MSMEG_3252 | hypothetical protein                         | S | POORLY CHARACTERIZED | RV2639C | 1.42 | 0.337 | Up |
| MSMEG_5851 | esterase                                     | R | POORLY CHARACTERIZED | RV0774C | 1.66 | 0.337 | Up |
| MSMEG_0763 | antibiotic transporter                       | R | POORLY CHARACTERIZED |         | 1.96 | 0.343 | Up |
| MSMEG_1114 | short chain dehydrogenase                    | R | POORLY CHARACTERIZED |         | 1.08 | 0.345 | Up |
| MSMEG_3542 | hypothetical protein                         | S | POORLY CHARACTERIZED |         | 1.34 | 0.346 | Up |
| MSMEG_3079 | hypothetical protein                         | R | POORLY CHARACTERIZED | RV1421  | 1.29 | 0.346 | Up |
| MSMEG_0283 | short chain dehydrogenase                    | R | POORLY CHARACTERIZED |         | 1.13 | 0.349 | Up |
| MSMEG_0984 | trap transporter 4tm/12tm fusion protein     | R | POORLY CHARACTERIZED |         | 1.86 | 0.350 | Up |
| MSMEG_0999 | integral membrane protein                    | S | POORLY CHARACTERIZED | RV0541C | 1.62 | 0.354 | Up |
| MSMEG_5066 | integral membrane protein                    | S | POORLY CHARACTERIZED | RV1231C | 1.49 | 0.355 | Up |
| MSMEG_1894 | short chain dehydrogenase                    | R | POORLY CHARACTERIZED | RV3224  | 1.77 | 0.356 | Up |
| MSMEG_0996 | hypothetical protein                         | S | POORLY CHARACTERIZED | RV0540  | 2.60 | 0.365 | Up |
| MSMEG_5830 | hypothetical protein                         | S | POORLY CHARACTERIZED | Rv0798c | 1.09 | 0.368 | Up |
| MSMEG_3244 | hypothetical protein                         | S | POORLY CHARACTERIZED |         | 1.10 | 0.372 | Up |
| rimI       | ribosomal-protein-alanine acetyltransferase  | R | POORLY CHARACTERIZED | Rv3420c | 1.71 | 0.376 | Up |
| MSMEG_2596 | peptidase C26                                | R | POORLY CHARACTERIZED | RV2859C | 1.04 | 0.382 | Up |
| MSMEG_2936 | hydrolase, nudix family protein              | S | POORLY CHARACTERIZED | RV2609C | 1.13 | 0.385 | Up |
| MSMEG_1660 | oxidoreductase, 2-nitropropane dioxygenase   | R | POORLY CHARACTERIZED | RV0021C | 1.33 | 0.385 | Up |
| MSMEG_3255 | DoxX subfamily protein                       | S | POORLY CHARACTERIZED |         | 1.62 | 0.393 | Up |
| MSMEG_3842 | esterase                                     | R | POORLY CHARACTERIZED |         | 1.49 | 0.397 | Up |
| MSMEG_2566 | 3-(alpha-(or 20-beta)-hydroxysteroid dehydro | R | POORLY CHARACTERIZED |         | 1.01 | 0.398 | Up |
| MSMEG_3303 | carboxylic ester hydrolase                   | R | POORLY CHARACTERIZED |         | 1.45 | 0.401 | Up |
| engA       | GTP-binding protein EngA                     | R | POORLY CHARACTERIZED | Rv1713  | 1.23 | 0.402 | Up |
| MSMEG_4462 | sodium:solute symporter                      | R | POORLY CHARACTERIZED |         | 1.20 | 0.409 | Up |
| MSMEG_0865 | membrane flanked domain-containing prote     | S | POORLY CHARACTERIZED | RV1226C | 1.40 | 0.410 | Up |
| MSMEG_0929 | Erk/YbiS/YciS/YnhG family protein            | S | POORLY CHARACTERIZED | RV0483  | 2.01 | 0.412 | Up |
| MSMEG_0930 | serine 3-dehydrogenase                       | R | POORLY CHARACTERIZED | RV0484C | 1.34 | 0.420 | Up |
| MSMEG_4971 | oxidoreductase                               | R | POORLY CHARACTERIZED | RV2781C | 1.44 | 0.424 | Up |
| MSMEG_3879 | short chain dehydrogenase                    | R | POORLY CHARACTERIZED | RV2073C | 1.71 | 0.430 | Up |
| MSMEG_5203 | DoxX subfamily protein                       | S | POORLY CHARACTERIZED |         | 1.06 | 0.434 | Up |
| MSMEG_2788 | ATP/GTP-binding integral membrane protein    | R | POORLY CHARACTERIZED | RV2670C | 1.80 | 0.436 | Up |
| MSMEG_1643 | hypothetical protein                         | S | POORLY CHARACTERIZED |         | 1.28 | 0.437 | Up |
| MSMEG_6219 | ATPase AAA                                   | R | POORLY CHARACTERIZED | Rv3692  | 1.37 | 0.439 | Up |
| MSMEG_2278 | membrane-bound oxidoreductase                | R | POORLY CHARACTERIZED |         | 1.03 | 0.443 | Up |
| MSMEG_5237 | hypothetical protein                         | R | POORLY CHARACTERIZED | RV1101C | 1.41 | 0.443 | Up |
| MSMEG_3290 | regulatory protein                           | R | POORLY CHARACTERIZED |         | 1.97 | 0.451 | Up |
| MSMEG_0089 | chromosome condensation protein              | R | POORLY CHARACTERIZED |         | 1.20 | 0.452 | Up |
| MSMEG_6069 | CobW/P47K domain-containing protein          | R | POORLY CHARACTERIZED | RV0106  | 1.26 | 0.463 | Up |
| MSMEG_0090 | hypothetical protein                         | S | POORLY CHARACTERIZED |         | 1.04 | 0.464 | Up |
| MSMEG_1070 | 3-oxoacyl-ACP reductase                      | R | POORLY CHARACTERIZED |         | 1.21 | 0.467 | Up |
| MSMEG_2767 | hypothetical protein                         | R | POORLY CHARACTERIZED | RV2695  | 1.08 | 0.469 | Up |
| MSMEG_1698 | ammonia monooxygenase                        | R | POORLY CHARACTERIZED |         | 1.08 | 0.469 | Up |
| MSMEG_5383 | dehydrogenase/reductase SDR family protei    | R | POORLY CHARACTERIZED |         | 1.12 | 0.470 | Up |
| MSMEG_1641 | hypothetical protein                         | S | POORLY CHARACTERIZED | RV3361C | 1.36 | 0.471 | Up |
| MSMEG_4577 | DegV family protein                          | S | POORLY CHARACTERIZED | RV2417C | 1.48 | 0.473 | Up |
| MSMEG_5235 | short chain dehydrogenase                    | R | POORLY CHARACTERIZED |         | 1.56 | 0.477 | Up |
| MSMEG_3619 | short chain dehydrogenase                    | R | POORLY CHARACTERIZED | RV1856C | 1.02 | 0.481 | Up |
| MSMEG_2279 | 3-hydroxyacyl-CoA dehydrogenase              | R | POORLY CHARACTERIZED |         | 1.48 | 0.487 | Up |
| MSMEG_1001 | acetyltransferase, gnat family protein       | R | POORLY CHARACTERIZED |         | 1.33 | 0.488 | Up |
| MSMEG_4894 | hypothetical protein                         | S | POORLY CHARACTERIZED |         | 1.40 | 0.491 | Up |
| MSMEG_4502 | 16S ribosomal RNA methyltransferase RsmE     | S | POORLY CHARACTERIZED |         | 1.04 | 0.497 | Up |
| MSMEG_1640 | ATP/GTP-binding protein                      | R | POORLY CHARACTERIZED | RV3362C | 1.35 | 0.498 | Up |
| MSMEG_3062 | hypothetical protein                         | S | POORLY CHARACTERIZED |         | 1.91 | 0.502 | Up |
| MSMEG_3170 | hypothetical protein                         | S | POORLY CHARACTERIZED |         | 1.09 | 0.503 | Up |
| MSMEG_6160 | ATP-dependent rna helicase, dead/deah box    | R | POORLY CHARACTERIZED | RV3649  | 1.28 | 0.505 | Up |
| MSMEG_1199 | hypothetical protein                         | S | POORLY CHARACTERIZED | RV0585C | 1.59 | 0.512 | Up |
| MSMEG_2188 | integral membrane protein                    | R | POORLY CHARACTERIZED |         | 1.30 | 0.512 | Up |
| MSMEG_5910 | quinone binding protein                      | S | POORLY CHARACTERIZED |         | 1.26 | 0.515 | Up |
| MSMEG_0997 | hypothetical protein                         | R | POORLY CHARACTERIZED |         | 1.25 | 0.515 | Up |
| MSMEG_6099 | hypothetical protein                         | S | POORLY CHARACTERIZED | RV3604C | 1.41 | 0.515 | Up |
| MSMEG_0809 | isoprenylcysteine carboxyl methyltransferase | S | POORLY CHARACTERIZED | RV1139C | 1.50 | 0.522 | Up |
| MSMEG_0224 | O-methyltransferase MdmC                     | R | POORLY CHARACTERIZED | RV0187  | 1.30 | 0.535 | Up |
| MSMEG_0621 | low molecular weight protein antigen 7       | S | POORLY CHARACTERIZED |         | 1.36 | 0.537 | Up |
| MSMEG_3083 | nucleoside-diphosphate sugar epimerase       | R | POORLY CHARACTERIZED |         | 1.17 | 0.545 | Up |
| MSMEG_5591 | hypothetical protein                         | R | POORLY CHARACTERIZED | RV0923C | 1.27 | 0.553 | Up |
| MSMEG_4307 | hypothetical protein                         | S | POORLY CHARACTERIZED | RV2230C | 1.13 | 0.556 | Up |
| MSMEG_1460 | pyridine nucleotide-disulfide oxidoreductase | R | POORLY CHARACTERIZED |         | 1.46 | 0.559 | Up |
| MSMEG_4583 | ATPase AAA                                   | R | POORLY CHARACTERIZED | RV2426C | 1.12 | 0.575 | Up |
| MSMEG_5287 | dehydrogenase                                | R | POORLY CHARACTERIZED |         | 1.15 | 0.584 | Up |
| MSMEG_2355 | hypothetical protein                         | R | POORLY CHARACTERIZED | RV3027C | 1.12 | 0.587 | Up |
| MSMEG_3867 | ATPase AAA                                   | R | POORLY CHARACTERIZED | RV3163C | 1.45 | 0.588 | Up |
| MSMEG_3289 | gp61 protein                                 | R | POORLY CHARACTERIZED |         | 1.35 | 0.602 | Up |
| MSMEG_6220 | lipoprotein                                  | R | POORLY CHARACTERIZED | RV3693  | 1.41 | 0.603 | Up |
| MSMEG_1689 | 3-oxoacyl-ACP reductase                      | R | POORLY CHARACTERIZED |         | 1.90 | 0.604 | Up |
| MSMEG_1195 | hypothetical protein                         | S | POORLY CHARACTERIZED |         | 1.00 | 0.620 | Up |
| recX       | recombination regulator RecX                 | R | POORLY CHARACTERIZED | Rv2736c | 1.32 | 0.633 | Up |
| MSMEG_1571 | integral membrane protein                    | R | POORLY CHARACTERIZED |         | 1.03 | 0.637 | Up |
| MSMEG_2733 | hypothetical protein                         | S | POORLY CHARACTERIZED | RV2728C | 1.04 | 0.672 | Up |
| MSMEG_0320 | phosphotriesterase                           | R | POORLY CHARACTERIZED | RV0230C | 1.10 | 0.672 | Up |
| MSMEG_4375 | 3-oxoacyl-ACP reductase                      | R | POORLY CHARACTERIZED |         | 1.02 | 0.690 | Up |

LIX79 196-1 vs. LIX70 196-1

| GeneName   | Product                                  | COG_Code | Function                         | RV Number | Geomean_Fold | P-value | Regulation |
|------------|------------------------------------------|----------|----------------------------------|-----------|--------------|---------|------------|
| MSMEG_3910 | muconate cycloisomerase                  | R        | POORLY CHARACTERIZED             |           | -1.14        | 0.045   | Down       |
| MSMEG_2112 | hypothetical protein                     | E        | METABOLISM                       |           | -1.11        | 0.052   | Down       |
| MSMEG_1782 | oxidoreductase, short chain dehydrogenas | R        | POORLY CHARACTERIZED             |           | -1.03        | 0.059   | Down       |
| MSMEG_3022 | transglycosylase associated protein      | S        | POORLY CHARACTERIZED             |           | -1.03        | 0.064   | Down       |
| MSMEG_6935 | N-acetylmuramoyl-L-alanine amidase       | M        | CELLULAR PROCESSES AND SIGNALING | RV3915    | -1.14        | 0.081   | Down       |
| MSMEG_5661 | ABC transporter ATP-binding protein      | V        | CELLULAR PROCESSES AND SIGNALING |           | -1.62        | 0.109   | Down       |

|            |                                             |   |                                    |         |       |       |      |
|------------|---------------------------------------------|---|------------------------------------|---------|-------|-------|------|
| MSMEG_0266 | arginine decarboxylase                      | E | METABOLISM                         | RV2531C | -1.15 | 0.122 | Down |
| MSMEG_1775 | cytochrome P450 monooxygenase               | Q | METABOLISM                         |         | -1.50 | 0.148 | Down |
| MSMEG_0375 | phospholipase D                             | I | METABOLISM                         |         | -2.35 | 0.165 | Down |
| MSMEG_0670 | FAD dependent oxidoreductase                | O | CELLULAR PROCESSES AND SIGNALING   |         | -1.21 | 0.166 | Down |
| MSMEG_0536 | intracellular protease Pfpl family protein  | R | POORLY CHARACTERIZED               |         | -1.33 | 0.233 | Down |
| MSMEG_5616 | glyoxalase/bleomycin resistance protein/d   | R | POORLY CHARACTERIZED               | RV0911  | -1.28 | 0.274 | Down |
| MSMEG_6768 | halogenase                                  | C | METABOLISM                         |         | -1.39 | 0.276 | Down |
| MSMEG_6769 | transporter monovalent cation:proton anti   | P | METABOLISM                         |         | -1.03 | 0.298 | Down |
| MSMEG_3364 | RhtB family protein transporter             | E | METABOLISM                         |         | -1.44 | 0.305 | Down |
| MSMEG_4618 | isochorismatase                             | Q | METABOLISM                         |         | -1.60 | 0.312 | Down |
| MSMEG_3930 | [NiFe] hydrogenase subunit gamma            | C | METABOLISM                         |         | -2.17 | 0.344 | Down |
| MSMEG_3536 | sugar transporter                           | G | METABOLISM                         |         | -1.38 | 0.355 | Down |
| MSMEG_5605 | cytochrome bd ubiquinol oxidase subunit I   | C | METABOLISM                         |         | -1.60 | 0.370 | Down |
| MSMEG_2855 | virulence factor Mce family protein         | Q | METABOLISM                         |         | -1.41 | 0.387 | Down |
| MSMEG_4318 | hypothetical protein                        | P | METABOLISM                         |         | -1.02 | 0.400 | Down |
| MSMEG_3954 | trehalose 6-phosphate phosphorylase         | G | METABOLISM                         |         | -1.65 | 0.439 | Down |
| wrbA       | NAD(P)H:quinone oxidoreductase, type IV     | R | POORLY CHARACTERIZED               |         | -1.08 | 0.459 | Down |
| MSMEG_4063 | amidohydrolase                              | R | POORLY CHARACTERIZED               |         | -1.08 | 0.573 | Down |
| MSMEG_2563 | cytochrome P450                             | Q | METABOLISM                         |         | -1.21 | 0.005 | Down |
| MSMEG_5922 | lipid-transfer protein                      | I | METABOLISM                         | Rv3522  | -1.27 | 0.007 | Down |
| MSMEG_6734 | dibenzothioephene desulfurization enzyme    | C | METABOLISM                         |         | -2.01 | 0.008 | Down |
| MSMEG_3726 | alcohol dehydrogenase                       | G | METABOLISM                         |         | -1.76 | 0.011 | Down |
| MSMEG_6885 | Mmcl protein                                | C | METABOLISM                         |         | -1.93 | 0.012 | Down |
| MSMEG_4822 | hypothetical protein                        | C | METABOLISM                         |         | -1.25 | 0.013 | Down |
| MSMEG_1392 | alcohol dehydrogenase                       | C | METABOLISM                         |         | -1.65 | 0.015 | Down |
| recC       | exodeoxyribonuclease V subunit gamma        | L | INFORMATION STORAGE AND PROCESSING | Rv0631c | -1.14 | 0.017 | Down |
| anmK       | anhydro-N-acetylmuramic acid kinase         | O | CELLULAR PROCESSES AND SIGNALING   |         | -1.56 | 0.018 | Down |
| dnaA       | chromosomal replication initiation protein  | L | INFORMATION STORAGE AND PROCESSING | Rv0001  | -1.19 | 0.019 | Down |
| cheR       | chemotaxis protein CheR                     | T | CELLULAR PROCESSES AND SIGNALING   |         | -1.47 | 0.019 | Down |
| MSMEG_6264 | oxidoreductase                              | E | METABOLISM                         |         | -1.44 | 0.020 | Down |
| MSMEG_2098 | fumarylacetoacetate hydrolase               | Q | METABOLISM                         |         | -1.15 | 0.022 | Down |
| MSMEG_1972 | methane monooxygenase component C           | C | METABOLISM                         |         | -1.12 | 0.023 | Down |
| MSMEG_2846 | ABC transporter permease                    | P | METABOLISM                         |         | -1.10 | 0.023 | Down |
| MSMEG_3362 | enoyl-CoA hydratase                         | I | METABOLISM                         |         | -1.39 | 0.027 | Down |
| MSMEG_1228 | sulfatase                                   | P | METABOLISM                         |         | -1.03 | 0.028 | Down |
| MSMEG_2539 | thiopurine S-methyltransferase (tpmt) sul   | J | INFORMATION STORAGE AND PROCESSING | RV0560C | -1.27 | 0.030 | Down |
| MSMEG_4814 | hypothetical protein                        | I | METABOLISM                         |         | -1.27 | 0.033 | Down |
| MSMEG_3318 | oxidoreductase                              | C | METABOLISM                         |         | -1.29 | 0.037 | Down |
| MSMEG_1570 | carboxylesterase                            | R | POORLY CHARACTERIZED               |         | -1.02 | 0.037 | Down |
| MSMEG_2208 | acyl-CoA dehydrogenase                      | I | METABOLISM                         |         | -1.02 | 0.037 | Down |
| MSMEG_6710 | alpha/beta hydrolase                        | I | METABOLISM                         |         | -1.17 | 0.038 | Down |
| MSMEG_3994 | short chain dehydrogenase                   | R | POORLY CHARACTERIZED               |         | -1.07 | 0.038 | Down |
| MSMEG_1319 | Asp/Glu racemase                            | Q | METABOLISM                         |         | -1.09 | 0.044 | Down |
| MSMEG_4420 | cupin                                       | S | POORLY CHARACTERIZED               |         | -1.89 | 0.044 | Down |
| MSMEG_3042 | bifunctional pyrimidine regulatory protein  | F | METABOLISM                         | Rv1379  | -1.15 | 0.044 | Down |
| MSMEG_3934 | phosphoenolpyruvate synthase                | G | METABOLISM                         |         | -1.99 | 0.045 | Down |
| MSMEG_5124 | 2,4-dienoyl-CoA reductase                   | C | METABOLISM                         | Rv1175c | -1.41 | 0.045 | Down |
| MSMEG_2146 | gp15 protein                                | S | POORLY CHARACTERIZED               |         | -1.07 | 0.048 | Down |
| MSMEG_1303 | transcriptional regulator                   | K | INFORMATION STORAGE AND PROCESSING |         | -1.10 | 0.049 | Down |
| MSMEG_0447 | hypothetical protein                        | O | CELLULAR PROCESSES AND SIGNALING   |         | -1.28 | 0.050 | Down |
| MSMEG_4646 | pyruvate synthase                           | C | METABOLISM                         | RV2455C | -1.15 | 0.050 | Down |
| MSMEG_3095 | D-ribose-binding periplasmic protein        | G | METABOLISM                         |         | -1.08 | 0.050 | Down |
| MSMEG_4387 | ABC transporter permease                    | P | METABOLISM                         |         | -1.52 | 0.052 | Down |
| MSMEG_4066 | hypothetical protein                        | Q | METABOLISM                         |         | -1.12 | 0.054 | Down |
| pcgG       | protocatechuate 3,4-dioxygenase subunit I   | Q | METABOLISM                         |         | -1.04 | 0.055 | Down |
| MSMEG_0635 | hypothetical protein                        | S | POORLY CHARACTERIZED               | RV0309  | -1.68 | 0.055 | Down |
| MSMEG_1448 | integral membrane transporter               | P | METABOLISM                         |         | -1.36 | 0.056 | Down |
| ppqB       | pyrroloquinoline quinone biosynthesis prot  | R | POORLY CHARACTERIZED               |         | -1.55 | 0.059 | Down |
| ltaE       | L-threonine aldolase                        | E | METABOLISM                         |         | -1.04 | 0.061 | Down |
| MSMEG_0351 | virulence factor mce family protein         | Q | METABOLISM                         |         | -1.41 | 0.063 | Down |
| MSMEG_6367 | glycosyl transferase family protein         | R | POORLY CHARACTERIZED               | Rv3782  | -1.26 | 0.063 | Down |
| MSMEG_5198 | carnitiny-CoA dehydratase                   | I | METABOLISM                         |         | -1.43 | 0.065 | Down |
| MSMEG_6763 | oxidoreductase                              | R | POORLY CHARACTERIZED               | RV0077C | -1.70 | 0.065 | Down |
| MSMEG_2194 | MerR family transcriptional regulator       | K | INFORMATION STORAGE AND PROCESSING |         | -1.04 | 0.067 | Down |
| MSMEG_0517 | sugar binding-protein dependent transport   | G | METABOLISM                         | RV2039C | -1.32 | 0.067 | Down |
| MSMEG_0474 | glucosamine--fructose-6-phosphate amin      | M | CELLULAR PROCESSES AND SIGNALING   |         | -1.48 | 0.069 | Down |
| MSMEG_5130 | extracellular solute-binding protein        | E | METABOLISM                         | Rv1166  | -1.35 | 0.070 | Down |
| MSMEG_1797 | salicylate esterase                         | R | POORLY CHARACTERIZED               |         | -1.11 | 0.072 | Down |
| MSMEG_1963 | transcriptional regulatory protein          | R | POORLY CHARACTERIZED               |         | -1.27 | 0.073 | Down |
| MSMEG_6686 | glutaryl-CoA dehydrogenase                  | I | METABOLISM                         |         | -1.06 | 0.074 | Down |
| MSMEG_0288 | FAD dependent oxidoreductase                | E | METABOLISM                         |         | -1.39 | 0.075 | Down |
| MSMEG_5372 | sensor protein KdpD                         | T | CELLULAR PROCESSES AND SIGNALING   | Rv1028c | -1.05 | 0.076 | Down |
| MSMEG_1086 | ABC transporter permease                    | P | METABOLISM                         |         | -1.67 | 0.076 | Down |
| MSMEG_1297 | hydroxydechloroatrazine ethylaminohydro     | R | POORLY CHARACTERIZED               |         | -1.21 | 0.079 | Down |
| MSMEG_0734 | Rieske (2Fe-2S) domain-containing protei    | R | POORLY CHARACTERIZED               |         | -1.02 | 0.081 | Down |
| MSMEG_4393 | carboxyvinyl-carboxyphosphonate phosph      | G | METABOLISM                         |         | -1.37 | 0.081 | Down |
| MSMEG_3929 | [NiFe] hydrogenase subunit delta            | C | METABOLISM                         |         | -1.07 | 0.083 | Down |
| MSMEG_1151 | DNA-binding protein                         | K | INFORMATION STORAGE AND PROCESSING |         | -1.34 | 0.083 | Down |
| MSMEG_4110 | 3-hydroxyacyl-CoA dehydrogenase             | I | METABOLISM                         |         | -1.49 | 0.083 | Down |
| MSMEG_2254 | oxalate decarboxylase OxdC                  | R | POORLY CHARACTERIZED               |         | -1.12 | 0.085 | Down |
| kdpB       | potassium-transporting ATPase subunit B     | P | METABOLISM                         | Rv1030  | -1.04 | 0.085 | Down |
| MSMEG_1034 | esterase                                    | R | POORLY CHARACTERIZED               |         | -1.18 | 0.086 | Down |
| cysE       | serine O-acetyltransferase                  | E | METABOLISM                         | Rv2335  | -1.03 | 0.086 | Down |
| MSMEG_1486 | RNA polymerase sigma factor SigL            | K | INFORMATION STORAGE AND PROCESSING |         | -1.07 | 0.089 | Down |
| argB       | acetylglutamate kinase                      | E | METABOLISM                         | Rv1654  | -1.20 | 0.090 | Down |
| MSMEG_4606 | hypothetical protein                        | D | CELLULAR PROCESSES AND SIGNALING   |         | -1.75 | 0.092 | Down |
| MSMEG_2081 | acyl-CoA dehydrogenase                      | I | METABOLISM                         | Rv3139  | -1.21 | 0.096 | Down |
| MSMEG_0902 | cyclopropane-fatty-acyl-phospholipid synt   | M | CELLULAR PROCESSES AND SIGNALING   | Rv0644c | -1.27 | 0.099 | Down |
| MSMEG_4879 | hypothetical protein                        | C | METABOLISM                         |         | -1.49 | 0.100 | Down |
| MSMEG_3579 | transmembrane protein                       | M | CELLULAR PROCESSES AND SIGNALING   | RV2434C | -1.36 | 0.100 | Down |
| MSMEG_3809 | hypothetical protein                        | C | METABOLISM                         |         | -1.43 | 0.102 | Down |
| MSMEG_3427 | metal dependent hydrolase                   | R | POORLY CHARACTERIZED               |         | -1.67 | 0.102 | Down |
| MSMEG_6725 | ABC transporter ATP-binding protein         | R | POORLY CHARACTERIZED               |         | -1.03 | 0.104 | Down |
| MSMEG_4809 | Rieske (2Fe-2S) domain-containing protei    | R | POORLY CHARACTERIZED               |         | -1.65 | 0.109 | Down |
| MSMEG_4077 | enoyl-CoA hydratase                         | I | METABOLISM                         |         | -1.12 | 0.110 | Down |
| MSMEG_6718 | transporter major facilitator family protei | G | METABOLISM                         |         | -1.03 | 0.114 | Down |
| MSMEG_2102 | nitrate transport ATP-binding protein NtrC  | P | METABOLISM                         |         | -1.19 | 0.114 | Down |
| MSMEG_2229 | enoyl-CoA hydratase                         | I | METABOLISM                         |         | -1.55 | 0.115 | Down |
| MSMEG_1796 | membrane protein                            | C | METABOLISM                         |         | -1.72 | 0.117 | Down |
| MSMEG_4853 | peptidase, M24 family protein               | E | METABOLISM                         |         | -1.18 | 0.117 | Down |
| MSMEG_3017 | hypothetical protein                        | S | POORLY CHARACTERIZED               | RV2567  | -1.27 | 0.119 | Down |
| MSMEG_4731 | acyl-CoA synthetase                         | Q | METABOLISM                         | Rv1521  | -1.32 | 0.119 | Down |
| MSMEG_3090 | ribose transporter permease RbsC            | G | METABOLISM                         |         | -1.10 | 0.120 | Down |
| MSMEG_3970 | glutamyl-tRNA(Gln) amidotransferase sub     | J | INFORMATION STORAGE AND PROCESSING | RV3175  | -1.13 | 0.120 | Down |
| MSMEG_2209 | GntR family transcriptional regulator       | K | INFORMATION STORAGE AND PROCESSING |         | -1.63 | 0.121 | Down |
| MSMEG_2845 | ABC transporter permease                    | P | METABOLISM                         |         | -1.29 | 0.122 | Down |
| purH       | bifunctional phosphoribosylaminoimidazo     | F | METABOLISM                         | Rv0957  | -1.16 | 0.125 | Down |
| MSMEG_3378 | beta-lactamase                              | V | CELLULAR PROCESSES AND SIGNALING   |         | -1.80 | 0.126 | Down |

|            |                                             |   |                                    |         |       |       |      |
|------------|---------------------------------------------|---|------------------------------------|---------|-------|-------|------|
| MSMEG_0125 | integral membrane protein                   | S | POORLY CHARACTERIZED               |         | -1.41 | 0.129 | Down |
| MSMEG_5579 | MarR family transcriptional regulator       | K | INFORMATION STORAGE AND PROCESSING |         | -1.26 | 0.130 | Down |
| MSMEG_1155 | carnitiny-CoA dehydratase                   | I | METABOLISM                         |         | -1.27 | 0.131 | Down |
| MSMEG_4521 | Tat (twin-arginine translocation) pathway   | P | METABOLISM                         |         | -1.24 | 0.132 | Down |
| MSMEG_1249 | ISMsm7, transposase orfB                    | L | INFORMATION STORAGE AND PROCESSING |         | -1.04 | 0.133 | Down |
| MSMEG_0506 | ABC transporter permease                    | G | METABOLISM                         |         | -1.37 | 0.133 | Down |
| MSMEG_0487 | ABC transporter permease                    | P | METABOLISM                         |         | -1.00 | 0.134 | Down |
| MSMEG_5520 | hypothetical protein                        | C | METABOLISM                         | Rv0953C | -1.15 | 0.134 | Down |
| MSMEG_3948 | acyltransferase                             | R | POORLY CHARACTERIZED               |         | -2.45 | 0.139 | Down |
| MSMEG_1964 | mitomycin radical oxidase                   | C | METABOLISM                         | RV1774  | -1.08 | 0.139 | Down |
| MSMEG_3657 | hypothetical protein                        | C | METABOLISM                         | RV1817  | -1.35 | 0.139 | Down |
| MSMEG_6389 | arabinoxyltransferase A                     | M | CELLULAR PROCESSES AND SIGNALING   | Rv3795  | -1.37 | 0.140 | Down |
| MSMEG_0534 | permease, major facilitator family protein  | G | METABOLISM                         |         | -1.34 | 0.140 | Down |
| MSMEG_4422 | oxidoreductase                              | C | METABOLISM                         |         | -1.08 | 0.147 | Down |
| MSMEG_2096 | integral membrane protein                   | R | POORLY CHARACTERIZED               |         | -2.15 | 0.148 | Down |
| MSMEG_4135 | lysine decarboxylase superfamily protein    | R | POORLY CHARACTERIZED               |         | -1.16 | 0.149 | Down |
| MSMEG_0293 | Rieske (2Fe-2S) domain-containing protein   | R | POORLY CHARACTERIZED               |         | -1.08 | 0.150 | Down |
| MSMEG_1137 | amino acid permease                         | E | METABOLISM                         |         | -1.35 | 0.151 | Down |
| MSMEG_2069 | phosphotransferase enzyme family protein    | R | POORLY CHARACTERIZED               |         | -1.00 | 0.152 | Down |
| MSMEG_6263 | glutamate synthase                          | E | METABOLISM                         |         | -1.08 | 0.154 | Down |
| MSMEG_2108 | hypothetical protein                        | R | POORLY CHARACTERIZED               |         | -1.09 | 0.155 | Down |
| MSMEG_0149 | thiamine biosynthesis protein ThiC          | H | METABOLISM                         | Rv0423c | -1.04 | 0.156 | Down |
| MSMEG_2810 | major facilitator superfamily protein       | G | METABOLISM                         |         | -1.12 | 0.156 | Down |
| MSMEG_6712 | maleylacetate reductase                     | C | METABOLISM                         |         | -1.36 | 0.156 | Down |
| MSMEG_5609 | carotenoid oxygenase                        | Q | METABOLISM                         | Rv0913C | -1.22 | 0.158 | Down |
| MSMEG_3357 | metal-dependent phosphohydrolase            | R | POORLY CHARACTERIZED               |         | -1.79 | 0.162 | Down |
| MSMEG_2005 | sugar phosphate isomerase/epimerase         | G | METABOLISM                         |         | -1.33 | 0.164 | Down |
| MSMEG_2807 | two-component system response regulator     | K | INFORMATION STORAGE AND PROCESSING |         | -1.43 | 0.164 | Down |
| MSMEG_3557 | amino acid permease                         | E | METABOLISM                         |         | -1.09 | 0.166 | Down |
| MSMEG_5593 | pyruvate dehydrogenase                      | H | METABOLISM                         |         | -1.24 | 0.166 | Down |
| MSMEG_2909 | starvation-sensing protein RspA             | R | POORLY CHARACTERIZED               |         | -1.20 | 0.166 | Down |
| MSMEG_5954 | cell surface polysaccharide biosynthesis    | M | CELLULAR PROCESSES AND SIGNALING   |         | -1.30 | 0.167 | Down |
| MSMEG_3346 | hydroxyacid aldolase                        | G | METABOLISM                         |         | -1.63 | 0.168 | Down |
| MSMEG_0174 | inner membrane protein                      | S | POORLY CHARACTERIZED               |         | -1.14 | 0.169 | Down |
| MSMEG_4386 | ABC transporter permease                    | P | METABOLISM                         |         | -2.23 | 0.170 | Down |
| MSMEG_2657 | peptidase, M16 family protein               | R | POORLY CHARACTERIZED               | Rv2782C | -1.19 | 0.170 | Down |
| MSMEG_5021 | alcohol dehydrogenase                       | R | POORLY CHARACTERIZED               |         | -1.33 | 0.171 | Down |
| MSMEG_0170 | transmembrane transporter                   | G | METABOLISM                         |         | -1.77 | 0.172 | Down |
| MSMEG_5509 | hypothetical protein                        | R | POORLY CHARACTERIZED               |         | -1.07 | 0.174 | Down |
| MSMEG_5364 | amidohydrolase                              | R | POORLY CHARACTERIZED               |         | -1.29 | 0.178 | Down |
| MSMEG_5420 | Tat-translocated enzyme                     | P | METABOLISM                         |         | -1.15 | 0.178 | Down |
| MSMEG_6872 | beta-lactamase                              | V | CELLULAR PROCESSES AND SIGNALING   |         | -1.41 | 0.179 | Down |
| MSMEG_4062 | glutamyl-tRNA(Gln) amidotransferase subunit | J | INFORMATION STORAGE AND PROCESSING |         | -1.19 | 0.179 | Down |
| MSMEG_3991 | cyclase                                     | R | POORLY CHARACTERIZED               |         | -1.12 | 0.179 | Down |
| MSMEG_4049 | sugar transporter permease                  | G | METABOLISM                         |         | -1.31 | 0.184 | Down |
| rpsO       | 30S ribosomal protein S15                   | J | INFORMATION STORAGE AND PROCESSING | Rv2785c | -1.06 | 0.185 | Down |
| MSMEG_2464 | 2Fe-2S-binding domain-containing protein    | C | METABOLISM                         |         | -1.65 | 0.186 | Down |
| MSMEG_6745 | GntR family transcriptional regulator       | K | INFORMATION STORAGE AND PROCESSING |         | -1.07 | 0.187 | Down |
| MSMEG_2067 | methyltransferase type 12                   | H | METABOLISM                         | RV2675C | -1.30 | 0.187 | Down |
| MSMEG_4093 | oxidoreductase, aldo/keto reductase         | C | METABOLISM                         | RV2298  | -1.25 | 0.188 | Down |
| MSMEG_0654 | hypothetical protein                        | C | METABOLISM                         |         | -1.03 | 0.188 | Down |
| MSMEG_4092 | alkanal monooxygenase                       | C | METABOLISM                         |         | -1.05 | 0.188 | Down |
| MSMEG_1506 | Tetr family transcriptional regulator       | S | POORLY CHARACTERIZED               |         | -1.21 | 0.189 | Down |
| MSMEG_6296 | 5-exo-alcohol dehydrogenase                 | R | POORLY CHARACTERIZED               |         | -1.41 | 0.190 | Down |
| MSMEG_0438 | periplasmic binding protein                 | P | METABOLISM                         | RV0265C | -1.23 | 0.192 | Down |
| MSMEG_4793 | virulence factor Mce family protein         | Q | METABOLISM                         |         | -1.10 | 0.196 | Down |
| MSMEG_2981 | branched-chain amino acid ABC transporter   | E | METABOLISM                         |         | -1.62 | 0.197 | Down |
| MSMEG_1756 | endonuclease VIII                           | L | INFORMATION STORAGE AND PROCESSING | Rv3297  | -2.36 | 0.197 | Down |
| cadA       | cadmium-translocating P-type ATPase         | P | METABOLISM                         | Rv1469  | -1.07 | 0.198 | Down |
| MSMEG_3517 | HAD-superfamily hydrolase                   | E | METABOLISM                         |         | -1.14 | 0.200 | Down |
| MSMEG_4456 | hypothetical protein                        | S | POORLY CHARACTERIZED               | RV2313C | -1.16 | 0.200 | Down |
| MSMEG_0339 | FMN-dependent monooxygenase                 | C | METABOLISM                         | RV3520C | -1.26 | 0.200 | Down |
| MSMEG_6795 | enoyl-CoA hydratase/isomerase               | I | METABOLISM                         |         | -1.91 | 0.202 | Down |
| MSMEG_2772 | amino acid permease                         | E | METABOLISM                         | RV2690C | -1.35 | 0.202 | Down |
| argS       | arginyl-tRNA synthetase                     | J | INFORMATION STORAGE AND PROCESSING | Rv1292  | -1.37 | 0.202 | Down |
| MSMEG_5839 | protease 2                                  | E | METABOLISM                         | Rv0781  | -1.12 | 0.203 | Down |
| MSMEG_3411 | MOSC domain-containing protein              | S | POORLY CHARACTERIZED               |         | -1.03 | 0.205 | Down |
| MSMEG_3367 | short-chain dehydrogenase/reductase SDR     | R | POORLY CHARACTERIZED               |         | -1.17 | 0.205 | Down |
| tgt        | queuine tRNA-ribosyltransferase             | J | INFORMATION STORAGE AND PROCESSING |         | -1.07 | 0.207 | Down |
| MSMEG_0126 | mandelate racemase/muconate lactonizir      | R | POORLY CHARACTERIZED               |         | -1.29 | 0.208 | Down |
| MSMEG_4949 | HemK family modification methylase          | J | INFORMATION STORAGE AND PROCESSING | Rv1300  | -1.23 | 0.208 | Down |
| MSMEG_6237 | hypothetical protein                        | H | METABOLISM                         |         | -1.22 | 0.208 | Down |
| MSMEG_6908 | HTH-type transcriptional regulator          | K | INFORMATION STORAGE AND PROCESSING | RV0043C | -1.09 | 0.208 | Down |
| MSMEG_4020 | enoyl-CoA hydratase/isomerase               | I | METABOLISM                         |         | -1.11 | 0.212 | Down |
| MSMEG_4610 | lgiC                                        | Q | METABOLISM                         |         | -1.07 | 0.212 | Down |
| glyS       | glycyl-tRNA synthetase                      | J | INFORMATION STORAGE AND PROCESSING |         | -1.34 | 0.213 | Down |
| MSMEG_3931 | [NiFe] hydrogenase subunit beta             | C | METABOLISM                         |         | -2.43 | 0.215 | Down |
| MSMEG_5979 | transferase                                 | J | INFORMATION STORAGE AND PROCESSING |         | -1.10 | 0.215 | Down |
| MSMEG_0205 | tetracenomycin polyketide synthesis hydro   | S | POORLY CHARACTERIZED               |         | -1.67 | 0.216 | Down |
| MSMEG_4008 | oxidoreductase, 2OG-Fe(II) oxygenase        | R | POORLY CHARACTERIZED               |         | -1.30 | 0.217 | Down |
| MSMEG_6833 | alcohol dehydrogenase                       | R | POORLY CHARACTERIZED               |         | -2.49 | 0.217 | Down |
| MSMEG_5671 | prolyl-tRNA synthetase                      | S | POORLY CHARACTERIZED               |         | -1.12 | 0.218 | Down |
| MSMEG_1452 | sulfatase-modifying factor 1                | S | POORLY CHARACTERIZED               |         | -1.20 | 0.219 | Down |
| MSMEG_3556 | integral membrane transporter               | H | METABOLISM                         |         | -1.40 | 0.222 | Down |
| MSMEG_0461 | Cin2 protein                                | S | POORLY CHARACTERIZED               |         | -1.53 | 0.225 | Down |
| MSMEG_3731 | dipeptidase 2                               | E | METABOLISM                         |         | -1.40 | 0.226 | Down |
| MSMEG_0568 | radical SAM domain-containing protein       | R | POORLY CHARACTERIZED               |         | -3.52 | 0.227 | Down |
| MSMEG_6317 | lipolytic protein G-D-S-L                   | E | METABOLISM                         |         | -1.18 | 0.227 | Down |
| MSMEG_6660 | permease, cytosine/purines, uracil, thiam   | F | METABOLISM                         |         | -1.09 | 0.229 | Down |
| MSMEG_1231 | inner membrane protein YidH                 | S | POORLY CHARACTERIZED               | RV2272  | -1.06 | 0.230 | Down |
| MSMEG_6639 | GntR family transcriptional regulator       | K | INFORMATION STORAGE AND PROCESSING |         | -1.03 | 0.230 | Down |
| MSMEG_0545 | LuxR family transcriptional regulator       | T | CELLULAR PROCESSES AND SIGNALING   | RV0386  | -1.32 | 0.231 | Down |
| MSMEG_5818 | virulence factor Mce family protein         | Q | METABOLISM                         | RV0169  | -1.29 | 0.231 | Down |
| MSMEG_4056 | hypothetical protein                        | G | METABOLISM                         |         | -1.06 | 0.231 | Down |
| MSMEG_3812 | acyl-CoA thioesterase                       | I | METABOLISM                         |         | -1.05 | 0.232 | Down |
| MSMEG_0157 | oxalyl-CoA decarboxylase                    | H | METABOLISM                         | Rv0118c | -1.25 | 0.232 | Down |
| MSMEG_5812 | short chain dehydrogenase                   | R | POORLY CHARACTERIZED               |         | -1.23 | 0.232 | Down |
| MSMEG_4082 | monooxygenase                               | C | METABOLISM                         |         | -1.33 | 0.233 | Down |
| MSMEG_3563 | drug transporter                            | G | METABOLISM                         | RV1877  | -1.19 | 0.235 | Down |
| MSMEG_5416 | LpqU protein                                | M | CELLULAR PROCESSES AND SIGNALING   | Rv1022  | -1.05 | 0.237 | Down |
| MSMEG_1154 | formyl-coenzyme A transferase               | C | METABOLISM                         |         | -1.25 | 0.238 | Down |
| MSMEG_3273 | glutamyl aminopeptidase, M42 family pro     | G | METABOLISM                         |         | -1.20 | 0.241 | Down |
| MSMEG_2172 | dicarboxylate-carrier protein               | P | METABOLISM                         |         | -1.03 | 0.241 | Down |
| MSMEG_3960 | transcriptional regulator                   | K | INFORMATION STORAGE AND PROCESSING |         | -1.08 | 0.241 | Down |
| MSMEG_0281 | choline dehydrogenase                       | E | METABOLISM                         |         | -1.60 | 0.243 | Down |
| rpsF       | 30S ribosomal protein S6                    | J | INFORMATION STORAGE AND PROCESSING | RV0053  | -1.00 | 0.244 | Down |
| MSMEG_4844 | acyl-CoA dehydrogenase                      | I | METABOLISM                         |         | -1.09 | 0.244 | Down |
| MSMEG_4736 | hypothetical protein                        | S | POORLY CHARACTERIZED               |         | -1.18 | 0.245 | Down |

|            |                                             |   |                                    |         |       |       |      |
|------------|---------------------------------------------|---|------------------------------------|---------|-------|-------|------|
| MSMEG_5615 | hypothetical protein                        | S | POORLY CHARACTERIZED               |         | -1.17 | 0.245 | Down |
| MSMEG_2165 | transketolase                               | G | METABOLISM                         |         | -1.39 | 0.247 | Down |
| MSMEG_6459 | ferredoxin-dependent glutamate synthase     | E | METABOLISM                         | Rv3859c | -1.02 | 0.247 | Down |
| MSMEG_2525 | amino acid permease                         | E | METABOLISM                         |         | -1.19 | 0.249 | Down |
| MSMEG_0535 | GntR family transcriptional regulator       | K | INFORMATION STORAGE AND PROCESSING |         | -1.39 | 0.249 | Down |
| MSMEG_5948 | glycosyl transferase family protein         | M | CELLULAR PROCESSES AND SIGNALING   |         | -1.23 | 0.249 | Down |
| MSMEG_0546 | hypothetical protein                        | H | METABOLISM                         |         | -1.30 | 0.249 | Down |
| MSMEG_2544 | LysR family transcriptional regulator       | K | INFORMATION STORAGE AND PROCESSING |         | -1.42 | 0.250 | Down |
| MSMEG_4154 | transposase, Mutator family protein         | L | INFORMATION STORAGE AND PROCESSING | Rv3431c | -1.53 | 0.250 | Down |
| MSMEG_0376 | AraC family transcriptional regulator       | K | INFORMATION STORAGE AND PROCESSING |         | -1.20 | 0.250 | Down |
| mhpA       | 3-(3-hydroxyphenyl)propionate hydroxylase   | C | METABOLISM                         |         | -1.31 | 0.250 | Down |
| MSMEG_5984 | UDP-phosphate galactosephosphotransferase   | M | CELLULAR PROCESSES AND SIGNALING   |         | -1.06 | 0.250 | Down |
| MSMEG_4123 | 3-hydroxyisobutyrate dehydrogenase          | I | METABOLISM                         |         | -1.03 | 0.252 | Down |
| MSMEG_2007 | HpcE protein                                | Q | METABOLISM                         |         | -1.13 | 0.252 | Down |
| MSMEG_0511 | sugar isomerase                             | M | CELLULAR PROCESSES AND SIGNALING   |         | -1.02 | 0.252 | Down |
| MSMEG_4075 | CoA-binding protein                         | C | METABOLISM                         |         | -1.28 | 0.253 | Down |
| hypB       | hydrogenase nickel incorporation protein    | K | INFORMATION STORAGE AND PROCESSING |         | -1.00 | 0.253 | Down |
| MSMEG_0350 | virulence factor Mce family protein         | Q | METABOLISM                         | Rv1970  | -1.02 | 0.254 | Down |
| MSMEG_3382 | ArsR family transcriptional regulator       | K | INFORMATION STORAGE AND PROCESSING |         | -1.04 | 0.255 | Down |
| MSMEG_3932 | hypothetical protein                        | O | CELLULAR PROCESSES AND SIGNALING   | Rv2031c | -3.02 | 0.256 | Down |
| MSMEG_0778 | transcriptional regulator                   | K | INFORMATION STORAGE AND PROCESSING |         | -1.50 | 0.258 | Down |
| MSMEG_6705 | regulatory protein                          | K | INFORMATION STORAGE AND PROCESSING |         | -1.28 | 0.258 | Down |
| MSMEG_4103 | alkanesulfonate monooxygenase               | C | METABOLISM                         |         | -1.24 | 0.258 | Down |
| MSMEG_2982 | periplasmic binding protein                 | E | METABOLISM                         |         | -1.02 | 0.259 | Down |
| MSMEG_2538 | MarR family transcriptional regulator       | K | INFORMATION STORAGE AND PROCESSING | Rv2887  | -1.46 | 0.259 | Down |
| MSMEG_2844 | ABC transporter ATP-binding protein         | R | POORLY CHARACTERIZED               |         | -1.59 | 0.261 | Down |
| MSMEG_2918 | short-chain dehydrogenase/reductase SDR     | R | POORLY CHARACTERIZED               |         | -1.18 | 0.261 | Down |
| MSMEG_6880 | hydrophobic amino acid ABC transporter      | E | METABOLISM                         |         | -1.01 | 0.262 | Down |
| MSMEG_0117 | hydrolase                                   | R | POORLY CHARACTERIZED               | Rv1190  | -1.28 | 0.263 | Down |
| MSMEG_2011 | LacI family transcriptional regulator       | K | INFORMATION STORAGE AND PROCESSING |         | -1.01 | 0.265 | Down |
| MSMEG_0341 | hypothetical protein                        | C | METABOLISM                         |         | -1.63 | 0.266 | Down |
| MSMEG_0475 | nucleotide-sugar dehydrogenase              | M | CELLULAR PROCESSES AND SIGNALING   |         | -1.33 | 0.266 | Down |
| MSMEG_3373 | major facilitator superfamily protein       | G | METABOLISM                         |         | -1.42 | 0.266 | Down |
| MSMEG_3544 | hypothetical protein                        | C | METABOLISM                         |         | -1.19 | 0.267 | Down |
| coaBC      | bifunctional phosphopantotheneoylcysteine   | H | METABOLISM                         |         | -2.11 | 0.267 | Down |
| MSMEG_5810 | monooxygenase                               | C | METABOLISM                         |         | -1.84 | 0.267 | Down |
| MSMEG_0531 | acyl-CoA dehydrogenase                      | I | METABOLISM                         |         | -1.31 | 0.268 | Down |
| MSMEG_4396 | isochorismatase hydrolase                   | Q | METABOLISM                         |         | -1.21 | 0.268 | Down |
| MSMEG_1133 | bifunctional short chain isoprenyl diphosph | H | METABOLISM                         | Rv0562  | -1.33 | 0.269 | Down |
| MSMEG_4023 | oxidoreductase                              | C | METABOLISM                         | Rv0794c | -1.24 | 0.270 | Down |
| MSMEG_6242 | alcohol dehydrogenase                       | C | METABOLISM                         |         | -1.81 | 0.271 | Down |
| MSMEG_1222 | ISMm6, transposase                          | L | INFORMATION STORAGE AND PROCESSING |         | -1.35 | 0.271 | Down |
| MSMEG_0881 | hypothetical protein                        | S | POORLY CHARACTERIZED               |         | -1.10 | 0.272 | Down |
| rpsT       | 30S ribosomal protein S20                   | J | INFORMATION STORAGE AND PROCESSING | Rv2412  | -1.06 | 0.272 | Down |
| sucD       | succinyl-CoA synthetase subunit alpha       | C | METABOLISM                         | Rv0952  | -1.03 | 0.273 | Down |
| MSMEG_2297 | glutaredoxin                                | O | CELLULAR PROCESSES AND SIGNALING   |         | -1.22 | 0.273 | Down |
| MSMEG_3157 | hypothetical protein                        | S | POORLY CHARACTERIZED               | Rv1491c | -1.05 | 0.273 | Down |
| hypF       | [NiFe] hydrogenase maturation protein H     | O | CELLULAR PROCESSES AND SIGNALING   |         | -1.24 | 0.273 | Down |
| MSMEG_6358 | mesocentin                                  | S | POORLY CHARACTERIZED               |         | -1.15 | 0.274 | Down |
| MSMEG_2908 | 2-keto-3-deoxygluconate kinase              | G | METABOLISM                         |         | -1.04 | 0.275 | Down |
| MSMEG_6340 | short-chain dehydrogenase/reductase SDR     | R | POORLY CHARACTERIZED               |         | -1.12 | 0.275 | Down |
| MSMEG_2924 | permease binding-protein component          | M | CELLULAR PROCESSES AND SIGNALING   |         | -1.21 | 0.276 | Down |
| MSMEG_2926 | glycine betaine/carnitine/choline transport | E | METABOLISM                         |         | -1.10 | 0.276 | Down |
| MSMEG_5443 | dehydrogenase                               | C | METABOLISM                         |         | -1.10 | 0.276 | Down |
| MSMEG_0781 | amino acid permease                         | E | METABOLISM                         |         | -1.46 | 0.277 | Down |
| MSMEG_0326 | AMP-dependent synthetase/ligase             | Q | METABOLISM                         |         | -1.50 | 0.278 | Down |
| MSMEG_6939 | Soj family protein                          | D | CELLULAR PROCESSES AND SIGNALING   | Rv3918c | -1.29 | 0.278 | Down |
| MSMEG_1458 | tena/thi-4 family protein                   | H | METABOLISM                         |         | -1.32 | 0.278 | Down |
| MSMEG_4855 | amidohydrolase                              | R | POORLY CHARACTERIZED               |         | -1.40 | 0.281 | Down |
| hisG       | ATP phosphoribosyltransferase               | E | METABOLISM                         | Rv2121c | -1.05 | 0.282 | Down |
| MSMEG_3715 | linear gramicidin synthetase subunit C      | Q | METABOLISM                         |         | -1.56 | 0.282 | Down |
| MSMEG_5394 | potassium-transporting ATPase subunit C     | P | METABOLISM                         | Rv1031  | -1.01 | 0.282 | Down |
| MSMEG_0147 | C-5 sterol desaturase                       | I | METABOLISM                         |         | -1.43 | 0.283 | Down |
| MSMEG_4074 | peroxisomal trans-2-enoyl-CoA reductase     | R | POORLY CHARACTERIZED               |         | -1.13 | 0.283 | Down |
| MSMEG_3987 | FAD dependent oxidoreductase                | C | METABOLISM                         |         | -1.30 | 0.283 | Down |
| MSMEG_4819 | hypothetical protein                        | C | METABOLISM                         |         | -1.13 | 0.284 | Down |
| MSMEG_4541 | ABC transporter ATP-binding protein         | R | POORLY CHARACTERIZED               |         | -1.49 | 0.284 | Down |
| MSMEG_2166 | transketolase                               | G | METABOLISM                         | Rv3379c | -1.15 | 0.284 | Down |
| MSMEG_3358 | YaeQ protein                                | S | POORLY CHARACTERIZED               |         | -1.16 | 0.286 | Down |
| MSMEG_6668 | ABC transporter periplasmic protein         | P | METABOLISM                         |         | -1.16 | 0.286 | Down |
| MSMEG_4119 | 3-hydroxybutyryl-CoA dehydratase            | I | METABOLISM                         |         | -1.20 | 0.287 | Down |
| MSMEG_0151 | PntAB protein                               | C | METABOLISM                         | Rv0156  | -1.40 | 0.287 | Down |
| MSMEG_6851 | phosphatidylethanolamine-binding protein    | R | POORLY CHARACTERIZED               | Rv1910c | -1.44 | 0.287 | Down |
| MSMEG_4357 | ABC transporter ATP-binding protein         | R | POORLY CHARACTERIZED               |         | -1.32 | 0.288 | Down |
| MSMEG_0514 | alpha-galactosidase                         | G | METABOLISM                         |         | -1.25 | 0.289 | Down |
| MSMEG_0270 | aminoglycoside phosphotransferase           | R | POORLY CHARACTERIZED               |         | -1.06 | 0.289 | Down |
| hydA       | phenylhydantoinase                          | F | METABOLISM                         |         | -1.33 | 0.289 | Down |
| MSMEG_6695 | cytochrome P450                             | Q | METABOLISM                         |         | -1.11 | 0.289 | Down |
| MSMEG_4551 | monooxygenase                               | C | METABOLISM                         |         | -1.01 | 0.291 | Down |
| MSMEG_2545 | ribosomal RNA large subunit methyltransf    | R | POORLY CHARACTERIZED               |         | -2.38 | 0.291 | Down |
| MSMEG_2236 | thiolase                                    | I | METABOLISM                         |         | -1.29 | 0.293 | Down |
| MSMEG_3216 | peroxiredoxin Q                             | O | CELLULAR PROCESSES AND SIGNALING   | Rv1608c | -1.08 | 0.294 | Down |
| MSMEG_6911 | ABC transporter ATP-binding protein         | E | METABOLISM                         |         | -1.30 | 0.294 | Down |
| MSMEG_0338 | acyl-CoA dehydrogenase                      | I | METABOLISM                         |         | -1.58 | 0.294 | Down |
| MSMEG_4859 | oxidoreductase, short chain dehydrogenas    | R | POORLY CHARACTERIZED               |         | -1.80 | 0.294 | Down |
| MSMEG_3006 | Fe-dependent alcohol dehydrogenase          | C | METABOLISM                         |         | -1.18 | 0.296 | Down |
| MSMEG_0185 | MmpL6 protein                               | R | POORLY CHARACTERIZED               |         | -1.10 | 0.296 | Down |
| MSMEG_1138 | alcohol dehydrogenase                       | C | METABOLISM                         |         | -1.01 | 0.296 | Down |
| MSMEG_5595 | MarR family transcriptional regulator       | K | INFORMATION STORAGE AND PROCESSING |         | -1.00 | 0.296 | Down |
| araB       | ribulokinase                                | C | METABOLISM                         |         | -1.66 | 0.297 | Down |
| MSMEG_3664 | transporter monovalent cation:proton anti   | P | METABOLISM                         | Rv3236c | -1.01 | 0.298 | Down |
| MSMEG_4118 | acyl-CoA dehydrogenase                      | I | METABOLISM                         |         | -1.48 | 0.298 | Down |
| MSMEG_2554 | phosphotransferase enzyme family protein    | R | POORLY CHARACTERIZED               |         | -1.04 | 0.299 | Down |
| gluT       | glutamine synthetase                        | E | METABOLISM                         |         | -1.12 | 0.300 | Down |
| MSMEG_4533 | sulfate-binding protein                     | P | METABOLISM                         | Rv2400c | -2.10 | 0.300 | Down |
| MSMEG_3936 | universal stress protein family protein     | T | CELLULAR PROCESSES AND SIGNALING   |         | -2.34 | 0.302 | Down |
| MSMEG_1177 | cytosine/purines uracil thiamine allantoin  | F | METABOLISM                         |         | -1.45 | 0.303 | Down |
| kdpA       | potassium-transporting ATPase A             | P | METABOLISM                         | Rv1029  | -1.05 | 0.304 | Down |
| MSMEG_4850 | short-chain dehydrogenase/reductase SDR     | R | POORLY CHARACTERIZED               |         | -1.12 | 0.304 | Down |
| MSMEG_3730 | Fis family transcriptional regulator        | K | INFORMATION STORAGE AND PROCESSING |         | -1.21 | 0.305 | Down |
| MSMEG_6708 | epoxide hydrolase                           | R | POORLY CHARACTERIZED               | Rv0134  | -1.00 | 0.305 | Down |
| MSMEG_1152 | citrate-proton symporter                    | G | METABOLISM                         |         | -1.44 | 0.307 | Down |
| MSMEG_3982 | acyl-CoA dehydrogenase                      | I | METABOLISM                         |         | -1.64 | 0.307 | Down |
| MSMEG_6838 | esterase                                    | R | POORLY CHARACTERIZED               |         | -1.15 | 0.311 | Down |
| MSMEG_4039 | aryl-alcohol dehydrogenase                  | C | METABOLISM                         |         | -1.35 | 0.312 | Down |
| MSMEG_2311 | hypothetical protein                        | R | POORLY CHARACTERIZED               |         | -1.33 | 0.312 | Down |
| MSMEG_2681 | proline imino-peptidase                     | R | POORLY CHARACTERIZED               | Rv0840c | -1.14 | 0.313 | Down |
| purC       | phosphoribosylaminoimidazole-succinocof     | F | METABOLISM                         | Rv0780  | -1.06 | 0.314 | Down |



|            |                                                |   |                                    |         |       |       |      |
|------------|------------------------------------------------|---|------------------------------------|---------|-------|-------|------|
| MSMEG_0481 | FAD dependent oxidoreductase                   | C | METABOLISM                         |         | -1.52 | 0.316 | Down |
| MSMEG_1123 | cobalamin synthesis protein                    | R | POORLY CHARACTERIZED               |         | -1.09 | 0.316 | Down |
| MSMEG_4801 | carveol dehydrogenase                          | R | POORLY CHARACTERIZED               |         | -1.05 | 0.317 | Down |
| MSMEG_6525 | hypothetical protein                           | A | INFORMATION STORAGE AND PROCESSING |         | -1.56 | 0.317 | Down |
| MSMEG_1330 | MarR family transcriptional regulator          | K | INFORMATION STORAGE AND PROCESSING |         | -1.13 | 0.318 | Down |
| MSMEG_0212 | lyase                                          | S | POORLY CHARACTERIZED               |         | -1.02 | 0.319 | Down |
| MSMEG_1117 | transcriptional regulator                      | K | INFORMATION STORAGE AND PROCESSING |         | -1.15 | 0.319 | Down |
| MSMEG_5024 | T/U mismatch-specific DNA glycosylase          | L | INFORMATION STORAGE AND PROCESSING |         | -1.62 | 0.320 | Down |
| MSMEG_5581 | hypothetical protein                           | S | POORLY CHARACTERIZED               |         | -1.04 | 0.320 | Down |
| MSMEG_3400 | glutamyl-tRNA(Gln) amidotransferase subunit    | J | INFORMATION STORAGE AND PROCESSING | Rv3375  | -1.31 | 0.321 | Down |
| MSMEG_0508 | glycerol-phosphate porter                      | G | METABOLISM                         | RV2038C | -1.01 | 0.322 | Down |
| MSMEG_4112 | cyclohexanecarboxylate-CoA ligase              | Q | METABOLISM                         |         | -1.58 | 0.323 | Down |
| MSMEG_6790 | AP endonuclease, family protein 2              | G | METABOLISM                         |         | -1.02 | 0.323 | Down |
| MSMEG_3578 | cyclase                                        | T | CELLULAR PROCESSES AND SIGNALING   | RV2435C | -1.07 | 0.324 | Down |
| MSMEG_1451 | arylsulfatase                                  | P | METABOLISM                         | Rv0711  | -1.23 | 0.325 | Down |
| MSMEG_2549 | major facilitator superfamily protein          | G | METABOLISM                         | RV1672C | -1.25 | 0.326 | Down |
| MSMEG_4740 | glycosyltransferase 28                         | C | METABOLISM                         |         | -1.25 | 0.326 | Down |
| MSMEG_0524 | short chain dehydrogenase                      | R | POORLY CHARACTERIZED               |         | -1.00 | 0.326 | Down |
| MSMEG_6835 | Fatty acid desaturase                          | I | METABOLISM                         |         | -1.44 | 0.326 | Down |
| MSMEG_0476 | chitin synthase                                | M | CELLULAR PROCESSES AND SIGNALING   |         | -1.10 | 0.327 | Down |
| narH       | nitrate reductase subunit beta                 | C | METABOLISM                         | Rv1162  | -1.35 | 0.330 | Down |
| MSMEG_0400 | peptide synthetase                             | Q | METABOLISM                         |         | -3.13 | 0.330 | Down |
| MSMEG_0349 | virulence factor mce family protein            | Q | METABOLISM                         | Rv1969  | -1.32 | 0.332 | Down |
| MSMEG_2217 | AMP-dependent synthetase/ligase                | Q | METABOLISM                         |         | -1.55 | 0.332 | Down |
| MSMEG_2912 | inner membrane metabolite transporter Y        | G | METABOLISM                         |         | -1.34 | 0.332 | Down |
| MSMEG_1795 | 2-deoxy-scyllo-inosamine dehydrogenase         | R | POORLY CHARACTERIZED               |         | -1.35 | 0.333 | Down |
| MSMEG_2812 | C-5 sterol desaturase                          | I | METABOLISM                         |         | -1.23 | 0.333 | Down |
| MSMEG_2677 | large membrane protein                         | R | POORLY CHARACTERIZED               |         | -1.52 | 0.333 | Down |
| ribS       | ribose operon repressor                        | K | INFORMATION STORAGE AND PROCESSING |         | -1.40 | 0.334 | Down |
| MSMEG_1390 | enoyl-CoA hydratase                            | I | METABOLISM                         | Rv0675  | -1.05 | 0.334 | Down |
| MSMEG_3945 | universal stress protein family protein        | T | CELLULAR PROCESSES AND SIGNALING   |         | -2.57 | 0.334 | Down |
| MSMEG_1798 | major facilitator superfamily protein          | G | METABOLISM                         |         | -1.02 | 0.335 | Down |
| MSMEG_0486 | ABC transporter periplasmic protein            | P | METABOLISM                         |         | -1.30 | 0.336 | Down |
| MSMEG_5626 | luciferase                                     | C | METABOLISM                         |         | -1.13 | 0.337 | Down |
| pstS       | phosphate ABC transporter substrate-binding    | P | METABOLISM                         |         | -1.09 | 0.337 | Down |
| MSMEG_2537 | transporter protein                            | G | METABOLISM                         |         | -1.14 | 0.337 | Down |
| MSMEG_1840 | rubredoxin                                     | C | METABOLISM                         | Rv3251c | -1.02 | 0.338 | Down |
| MSMEG_3436 | hypothetical protein                           | S | POORLY CHARACTERIZED               | RV0366C | -1.02 | 0.339 | Down |
| MSMEG_3434 | peptidyl-prolyl cis-trans isomerase domain     | O | CELLULAR PROCESSES AND SIGNALING   |         | -1.04 | 0.341 | Down |
| MSMEG_3953 | hypothetical protein                           | I | METABOLISM                         | Rv0533c | -2.22 | 0.342 | Down |
| MSMEG_4472 | multidrug-efflux transporter protein           | G | METABOLISM                         |         | -1.09 | 0.342 | Down |
| MSMEG_2996 | hypothetical protein                           | C | METABOLISM                         |         | -1.24 | 0.343 | Down |
| MSMEG_2856 | virulence factor Mce family protein            | Q | METABOLISM                         |         | -1.32 | 0.343 | Down |
| MSMEG_0655 | glucose 1-dehydrogenase                        | R | POORLY CHARACTERIZED               |         | -1.09 | 0.343 | Down |
| MSMEG_1220 | ABC transporter permease                       | E | METABOLISM                         |         | -1.47 | 0.344 | Down |
| ampC       | beta-lactamase                                 | V | CELLULAR PROCESSES AND SIGNALING   |         | -1.56 | 0.345 | Down |
| MSMEG_1082 | response regulator                             | K | INFORMATION STORAGE AND PROCESSING |         | -1.41 | 0.345 | Down |
| MSMEG_3349 | trap dicarboxylate transporter dctq subunit    | Q | METABOLISM                         |         | -1.41 | 0.348 | Down |
| MSMEG_6874 | aldehyde dehydrogenase                         | C | METABOLISM                         |         | -1.35 | 0.348 | Down |
| MSMEG_1607 | tautomerase                                    | R | POORLY CHARACTERIZED               |         | -1.15 | 0.349 | Down |
| MSMEG_5728 | polysaccharide deacetylase                     | G | METABOLISM                         |         | -1.00 | 0.350 | Down |
| MSMEG_1780 | hypothetical protein                           | P | METABOLISM                         |         | -1.37 | 0.350 | Down |
| MSMEG_0530 | short chain dehydrogenase                      | R | POORLY CHARACTERIZED               |         | -1.46 | 0.351 | Down |
| MSMEG_0343 | TetR family transcriptional regulator          | K | INFORMATION STORAGE AND PROCESSING |         | -1.07 | 0.352 | Down |
| MSMEG_0543 | hypothetical protein                           | C | METABOLISM                         |         | -1.18 | 0.353 | Down |
| MSMEG_2212 | short chain dehydrogenase                      | R | POORLY CHARACTERIZED               | RV2263  | -1.15 | 0.353 | Down |
| MSMEG_0158 | formyl-coenzyme A transferase                  | C | METABOLISM                         |         | -1.14 | 0.354 | Down |
| MSMEG_1140 | NAD(P)H-dependent glycerol-3-phosphate         | C | METABOLISM                         |         | -1.35 | 0.354 | Down |
| MSMEG_0515 | sugar transporter sugar binding lipoprotein    | G | METABOLISM                         |         | -1.79 | 0.355 | Down |
| MSMEG_1513 | hypothetical protein                           | C | METABOLISM                         |         | -1.07 | 0.356 | Down |
| MSMEG_6309 | ABC transporter ATP-binding protein            | E | METABOLISM                         |         | -1.28 | 0.356 | Down |
| MSMEG_3040 | beta-lactamase                                 | V | CELLULAR PROCESSES AND SIGNALING   | RV1367C | -1.30 | 0.358 | Down |
| MSMEG_3805 | oxidoreductase, short chain dehydrogenase      | R | POORLY CHARACTERIZED               |         | -1.16 | 0.358 | Down |
| pcaH       | protocatechuate 3,4-dioxygenase subunit        | Q | METABOLISM                         |         | -1.20 | 0.359 | Down |
| MSMEG_3951 | hypothetical protein                           | I | METABOLISM                         |         | -1.45 | 0.360 | Down |
| pqqE       | pyrroloquinoline quinone biosynthesis protein  | R | POORLY CHARACTERIZED               |         | -1.13 | 0.360 | Down |
| MSMEG_0824 | hypothetical protein                           | R | POORLY CHARACTERIZED               | RV0421C | -1.15 | 0.361 | Down |
| MSMEG_4389 | monooxygenase, NtaA/SnaA/SoxA family           | C | METABOLISM                         |         | -1.18 | 0.361 | Down |
| MSMEG_0442 | tetracycline repressor domain-containing       | K | INFORMATION STORAGE AND PROCESSING |         | -1.08 | 0.362 | Down |
| MSMEG_1751 | norsolorinic acid reductase                    | C | METABOLISM                         | RV2298  | -1.20 | 0.363 | Down |
| MSMEG_6765 | ABC transporter                                | V | CELLULAR PROCESSES AND SIGNALING   |         | -1.15 | 0.363 | Down |
| MSMEG_2894 | steroid monooxygenase                          | P | METABOLISM                         |         | -1.38 | 0.365 | Down |
| MSMEG_4765 | MerR family transcriptional regulator          | K | INFORMATION STORAGE AND PROCESSING |         | -1.30 | 0.365 | Down |
| MSMEG_5953 | hypothetical protein                           | E | METABOLISM                         |         | -1.06 | 0.367 | Down |
| MSMEG_6854 | 3-isopropylmalate dehydratase large subunit    | E | METABOLISM                         |         | -1.80 | 0.367 | Down |
| MSMEG_0576 | MmpL4 protein                                  | R | POORLY CHARACTERIZED               |         | -1.50 | 0.368 | Down |
| MSMEG_4785 | mce-family protein mce1f                       | Q | METABOLISM                         |         | -1.25 | 0.369 | Down |
| MSMEG_3944 | two component transcriptional regulatory       | K | INFORMATION STORAGE AND PROCESSING | Rv3133c | -1.49 | 0.370 | Down |
| MSMEG_1979 | antibiotic biosynthesis monooxygenase          | S | POORLY CHARACTERIZED               |         | -1.37 | 0.370 | Down |
| MSMEG_1301 | hypothetical protein                           | K | INFORMATION STORAGE AND PROCESSING |         | -1.35 | 0.371 | Down |
| MSMEG_6774 | enoyl-CoA hydratase                            | I | METABOLISM                         |         | -1.34 | 0.373 | Down |
| MSMEG_5494 | acyl-CoA dehydrogenase                         | I | METABOLISM                         | Rv0972c | -1.23 | 0.374 | Down |
| MSMEG_4087 | major facilitator superfamily protein          | G | METABOLISM                         |         | -1.26 | 0.374 | Down |
| MSMEG_0333 | carboxyl transferase domain-containing protein | I | METABOLISM                         |         | -1.11 | 0.375 | Down |
| MSMEG_0284 | ribosyl-dihydroxycotinamide dehydrogenase      | R | POORLY CHARACTERIZED               |         | -1.30 | 0.375 | Down |
| MSMEG_0484 | formamidase                                    | C | METABOLISM                         |         | -1.28 | 0.376 | Down |
| MSMEG_0772 | phytase                                        | S | POORLY CHARACTERIZED               |         | -1.32 | 0.378 | Down |
| MSMEG_5573 | sugar ABC transporter permease                 | G | METABOLISM                         |         | -1.14 | 0.379 | Down |
| rpmM       | 50S ribosomal protein L13                      | J | INFORMATION STORAGE AND PROCESSING | Rv3443c | -1.03 | 0.379 | Down |
| MSMEG_3449 | DNA-binding protein                            | H | METABOLISM                         |         | -1.16 | 0.380 | Down |
| soxR       | redox-sensitive transcriptional activator SoxR | K | INFORMATION STORAGE AND PROCESSING |         | -1.32 | 0.380 | Down |
| MSMEG_1085 | dipeptide transporter permease DppB            | P | METABOLISM                         |         | -1.13 | 0.381 | Down |
| MSMEG_4448 | transcriptional modulator of MazE              | T | CELLULAR PROCESSES AND SIGNALING   |         | -1.01 | 0.381 | Down |
| MSMEG_3248 | branched-chain amino acid ABC transporter      | E | METABOLISM                         |         | -1.10 | 0.381 | Down |
| MSMEG_2042 | phosphotransferase enzyme family protein       | R | POORLY CHARACTERIZED               | RV3168  | -1.29 | 0.381 | Down |
| MSMEG_3583 | monooxygenase                                  | C | METABOLISM                         |         | -1.11 | 0.382 | Down |
| MSMEG_4048 | cyclase                                        | R | POORLY CHARACTERIZED               |         | -1.43 | 0.383 | Down |
| MSMEG_2239 | TetR family transcriptional regulator          | K | INFORMATION STORAGE AND PROCESSING |         | -1.45 | 0.384 | Down |
| MSMEG_6469 | hypothetical protein                           | S | POORLY CHARACTERIZED               | RV0140  | -1.27 | 0.386 | Down |
| MSMEG_4450 | alpha/beta hydrolase                           | E | METABOLISM                         |         | -1.11 | 0.386 | Down |
| MSMEG_3947 | 6-phosphofructokinase                          | G | METABOLISM                         | RV2029c | -2.23 | 0.386 | Down |
| MSMEG_5109 | hypothetical protein                           | R | POORLY CHARACTERIZED               |         | -1.06 | 0.387 | Down |
| MSMEG_6669 | ABC transporter permease                       | R | POORLY CHARACTERIZED               |         | -1.07 | 0.389 | Down |
| MSMEG_5565 | hypothetical protein                           | S | POORLY CHARACTERIZED               |         | -1.35 | 0.390 | Down |
| MSMEG_1306 | aldehyde dehydrogenase                         | C | METABOLISM                         |         | -1.53 | 0.391 | Down |
| MSMEG_2171 | L-carnitine dehydratase/bile acid-inducible    | C | METABOLISM                         |         | -1.44 | 0.392 | Down |
| MSMEG_5802 | oxidoreductase, short chain dehydrogenase      | R | POORLY CHARACTERIZED               |         | -1.21 | 0.393 | Down |
| MSMEG_5194 | integral membrane protein                      | G | METABOLISM                         |         | -1.01 | 0.394 | Down |

|            |                                             |   |                                    |         |       |       |      |
|------------|---------------------------------------------|---|------------------------------------|---------|-------|-------|------|
| MSMEG_2978 | ABC transporter ATP-binding protein         | E | METABOLISM                         |         | -1.33 | 0.394 | Down |
| MSMEG_4335 | diacylglycerol kinase                       | R | POORLY CHARACTERIZED               |         | -1.06 | 0.396 | Down |
| MSMEG_5523 | peptidase                                   | E | METABOLISM                         |         | -1.05 | 0.398 | Down |
| MSMEG_6496 | nitrate/sulfonate/bicarbonate ABC transp    | P | METABOLISM                         |         | -2.91 | 0.401 | Down |
| MSMEG_6564 | TetR family transcriptional regulator       | K | INFORMATION STORAGE AND PROCESSING |         | -1.45 | 0.401 | Down |
| MSMEG_0148 | Tetr family transcriptional regulator       | K | INFORMATION STORAGE AND PROCESSING |         | -1.41 | 0.402 | Down |
| MSMEG_6941 | R3H domain-containing protein               | R | POORLY CHARACTERIZED               | RV3920C | -1.23 | 0.402 | Down |
| MSMEG_0128 | thioesterase                                | R | POORLY CHARACTERIZED               | RV0163  | -1.41 | 0.404 | Down |
| MSMEG_4397 | MerR family transcriptional regulator       | K | INFORMATION STORAGE AND PROCESSING |         | -1.11 | 0.405 | Down |
| hybA       | hydrogenase-2, small subunit                | C | METABOLISM                         |         | -1.39 | 0.406 | Down |
| narI       | respiratory nitrate reductase subunit gam   | C | METABOLISM                         | RV1164  | -1.78 | 0.407 | Down |
| MSMEG_1977 | alcohol dehydrogenase                       | R | POORLY CHARACTERIZED               |         | -1.32 | 0.407 | Down |
| MSMEG_3905 | hypothetical protein                        | S | POORLY CHARACTERIZED               | RV2117  | -1.01 | 0.407 | Down |
| MSMEG_4140 | GntR family transcriptional regulator       | E | METABOLISM                         |         | -1.38 | 0.408 | Down |
| MSMEG_1281 | hypothetical protein                        | S | POORLY CHARACTERIZED               |         | -1.07 | 0.408 | Down |
| rpoZ       | DNA-directed RNA polymerase subunit om      | K | INFORMATION STORAGE AND PROCESSING | RV1390  | -1.11 | 0.408 | Down |
| MSMEG_3942 | hypothetical protein                        | S | POORLY CHARACTERIZED               | RV2004C | -2.29 | 0.409 | Down |
| MSMEG_2252 | flavin-type hydroxylase                     | C | METABOLISM                         |         | -1.31 | 0.409 | Down |
| MSMEG_2879 | acyl-CoA dehydrogenase                      | I | METABOLISM                         |         | -1.31 | 0.409 | Down |
| MSMEG_2162 | MmcI protein                                | C | METABOLISM                         |         | -1.72 | 0.410 | Down |
| MSMEG_3301 | hypothetical protein                        | C | METABOLISM                         |         | -1.40 | 0.410 | Down |
| MSMEG_4798 | L-carnitine dehydratase/bile acid-inducibl  | C | METABOLISM                         |         | -1.01 | 0.410 | Down |
| MSMEG_0485 | amidase                                     | J | INFORMATION STORAGE AND PROCESSING |         | -1.14 | 0.411 | Down |
| MSMEG_5632 | oxidoreductase, short chain dehydrogenas    | R | POORLY CHARACTERIZED               |         | -1.23 | 0.411 | Down |
| MSMEG_4102 | hypothetical protein                        | I | METABOLISM                         |         | -1.58 | 0.414 | Down |
| MSMEG_1173 | ArsR family transcriptional regulator       | K | INFORMATION STORAGE AND PROCESSING | RV2642  | -1.25 | 0.414 | Down |
| MSMEG_0526 | oxidoreductase, GMC family protein          | E | METABOLISM                         |         | -1.51 | 0.414 | Down |
| oppD       | ABC transporter ATP-binding protein         | P | METABOLISM                         | RV1281C | -1.30 | 0.414 | Down |
| MSMEG_0817 | LysR family transcriptional regulator       | K | INFORMATION STORAGE AND PROCESSING |         | -1.01 | 0.415 | Down |
| MSMEG_2241 | acyl-CoA synthetase                         | Q | METABOLISM                         |         | -1.03 | 0.416 | Down |
| MSMEG_4155 | transposase A                               | L | INFORMATION STORAGE AND PROCESSING |         | -1.20 | 0.417 | Down |
| MSMEG_1125 | ArsR family transcriptional regulator       | K | INFORMATION STORAGE AND PROCESSING | RV2621C | -1.14 | 0.418 | Down |
| MSMEG_1178 | transcriptional regulator                   | K | INFORMATION STORAGE AND PROCESSING |         | -1.44 | 0.418 | Down |
| MSMEG_1509 | Tetr family transcriptional regulator       | K | INFORMATION STORAGE AND PROCESSING |         | -1.17 | 0.421 | Down |
| MSMEG_2456 | 5,10-methylenetetrahydromethanopterin       | C | METABOLISM                         |         | -1.12 | 0.424 | Down |
| MSMEG_6700 | regulatory protein                          | K | INFORMATION STORAGE AND PROCESSING |         | -1.27 | 0.425 | Down |
| MSMEG_1211 | Fatty acid desaturase                       | I | METABOLISM                         |         | -1.40 | 0.427 | Down |
| MSMEG_0839 | ATP-dependent protease La                   | R | POORLY CHARACTERIZED               | RV0434  | -1.14 | 0.429 | Down |
| MSMEG_0912 | 3-hydroxybutyryl-CoA dehydrogenase          | I | METABOLISM                         |         | -1.15 | 0.429 | Down |
| MSMEG_0428 | nitrite reductase [NAD(P)H] small subunit   | R | POORLY CHARACTERIZED               | RV0468  | -1.40 | 0.429 | Down |
| MSMEG_6780 | phenazine biosynthesis protein PhzF         | R | POORLY CHARACTERIZED               | RV0253  | -1.47 | 0.431 | Down |
| MSMEG_6776 | LysR family transcriptional regulator       | K | INFORMATION STORAGE AND PROCESSING |         | -1.02 | 0.431 | Down |
| mntN       | MTA/SAH nucleosidase                        | F | METABOLISM                         |         | -1.32 | 0.431 | Down |
| MSMEG_5807 | D-methionine transport ATP-binding prote    | P | METABOLISM                         |         | -1.11 | 0.434 | Down |
| MSMEG_3369 | transporter                                 | G | METABOLISM                         |         | -1.12 | 0.434 | Down |
| MSMEG_5479 | type I antifreeze protein                   | S | POORLY CHARACTERIZED               | RV0991C | -1.08 | 0.435 | Down |
| MSMEG_2598 | short chain dehydrogenase                   | R | POORLY CHARACTERIZED               | RV2857C | -1.86 | 0.436 | Down |
| MSMEG_2039 | transcriptional regulator                   | K | INFORMATION STORAGE AND PROCESSING |         | -1.02 | 0.439 | Down |
| MSMEG_5112 | hypothetical protein                        | A | INFORMATION STORAGE AND PROCESSING |         | -1.08 | 0.439 | Down |
| MSMEG_6037 | 2-hydroxy-6-ketono-2,4-dienedioic acid      | R | POORLY CHARACTERIZED               |         | -1.21 | 0.440 | Down |
| MSMEG_5968 | polysaccharide biosynthesis protein         | R | POORLY CHARACTERIZED               |         | -1.22 | 0.440 | Down |
| dcd        | deoxycytidine triphosphate deaminase        | F | METABOLISM                         | RV0321  | -1.35 | 0.441 | Down |
| MSMEG_0532 | Tetr family transcriptional regulator       | K | INFORMATION STORAGE AND PROCESSING |         | -1.06 | 0.441 | Down |
| MSMEG_5395 | sensor protein KdpD                         | T | CELLULAR PROCESSES AND SIGNALING   | RV1028c | -1.31 | 0.442 | Down |
| MSMEG_2666 | multimeric flavodoxin WrbA                  | R | POORLY CHARACTERIZED               | RV2771C | -1.99 | 0.442 | Down |
| MSMEG_4823 | cytochrome p450                             | Q | METABOLISM                         |         | -1.11 | 0.444 | Down |
| MSMEG_1158 | 5-oxovalerate dehydrogenase                 | C | METABOLISM                         |         | -1.39 | 0.446 | Down |
| MSMEG_6510 | multidrug ABC transporter                   | V | CELLULAR PROCESSES AND SIGNALING   |         | -1.10 | 0.447 | Down |
| MSMEG_4002 | oxidoreductase, zinc-binding dehydrogenas   | R | POORLY CHARACTERIZED               |         | -1.21 | 0.449 | Down |
| MSMEG_4858 | Tetr family transcriptional regulator       | K | INFORMATION STORAGE AND PROCESSING |         | -1.08 | 0.449 | Down |
| MSMEG_3513 | hypothetical protein                        | R | POORLY CHARACTERIZED               | RV2416c | -1.36 | 0.450 | Down |
| MSMEG_3402 | cytosine permease                           | F | METABOLISM                         |         | -1.29 | 0.450 | Down |
| MSMEG_1975 | amidohydrolase                              | R | POORLY CHARACTERIZED               |         | -1.22 | 0.453 | Down |
| MSMEG_2952 | transporter                                 | G | METABOLISM                         |         | -1.01 | 0.453 | Down |
| MSMEG_2193 | Tetr family transcriptional regulator       | K | INFORMATION STORAGE AND PROCESSING |         | -1.35 | 0.455 | Down |
| MSMEG_3398 | integral membrane transporter               | G | METABOLISM                         |         | -1.16 | 0.456 | Down |
| MSMEG_2600 | regulatory protein                          | K | INFORMATION STORAGE AND PROCESSING |         | -1.66 | 0.457 | Down |
| MSMEG_0196 | dehydrogenase                               | C | METABOLISM                         |         | -1.30 | 0.458 | Down |
| MSMEG_1074 | polysaccharide deacetylase                  | G | METABOLISM                         |         | -1.08 | 0.459 | Down |
| MSMEG_3348 | extracellular solute-binding protein        | G | METABOLISM                         |         | -1.05 | 0.462 | Down |
| MSMEG_5140 | nitrate reductase subunit alpha             | C | METABOLISM                         | RV1161  | -1.06 | 0.462 | Down |
| MSMEG_1298 | guanine deaminase                           | R | POORLY CHARACTERIZED               |         | -1.17 | 0.468 | Down |
| MSMEG_4004 | 3-oxoacyl-ACP reductase                     | R | POORLY CHARACTERIZED               |         | -1.29 | 0.469 | Down |
| MSMEG_5778 | alcohol dehydrogenase                       | R | POORLY CHARACTERIZED               |         | -1.19 | 0.484 | Down |
| MSMEG_5931 | short chain dehydrogenase                   | R | POORLY CHARACTERIZED               | RV3530C | -1.05 | 0.484 | Down |
| MSMEG_6300 | GntR family transcriptional regulator       | K | INFORMATION STORAGE AND PROCESSING |         | -1.36 | 0.488 | Down |
| MSMEG_5317 | hypothetical protein                        | A | INFORMATION STORAGE AND PROCESSING | RV0314C | -1.22 | 0.489 | Down |
| MSMEG_5184 | alpha-methylacyl-CoA racemase               | C | METABOLISM                         | RV1143  | -1.34 | 0.490 | Down |
| MSMEG_4886 | major facilitator family protein transporte | G | METABOLISM                         |         | -1.72 | 0.492 | Down |
| MSMEG_0469 | PadR family transcriptional regulator       | K | INFORMATION STORAGE AND PROCESSING |         | -1.78 | 0.493 | Down |
| MSMEG_4439 | acetyltransferase                           | J | INFORMATION STORAGE AND PROCESSING |         | -1.38 | 0.493 | Down |
| MSMEG_3823 | 3-oxoacyl-ACP reductase                     | R | POORLY CHARACTERIZED               |         | -1.48 | 0.493 | Down |
| MSMEG_4795 | ABC transporter                             | Q | METABOLISM                         |         | -1.10 | 0.494 | Down |
| MSMEG_6643 | DNA-binding protein                         | R | POORLY CHARACTERIZED               | RV1129C | -1.13 | 0.494 | Down |
| MSMEG_6870 | creatinine amidohydrolase                   | R | POORLY CHARACTERIZED               |         | -1.75 | 0.494 | Down |
| MSMEG_3927 | peptidase M52, hydrogen uptake protein      | C | METABOLISM                         |         | -1.23 | 0.495 | Down |
| MSMEG_1351 | cyclopropane-fatty-acyl-phospholipid synt   | M | CELLULAR PROCESSES AND SIGNALING   | RV3392c | -1.36 | 0.495 | Down |
| MSMEG_0217 | alcohol dehydrogenase                       | C | METABOLISM                         |         | -1.14 | 0.497 | Down |
| MSMEG_1100 | DGPFAETKE domain-containing protein         | S | POORLY CHARACTERIZED               |         | -1.36 | 0.500 | Down |
| MSMEG_2286 | aminoglycoside phosphotransferase           | R | POORLY CHARACTERIZED               |         | -1.03 | 0.500 | Down |
| MSMEG_0195 | steroid monooxygenase                       | P | METABOLISM                         |         | -1.29 | 0.505 | Down |
| MSMEG_5366 | hypothetical protein                        | G | METABOLISM                         |         | -1.09 | 0.506 | Down |
| MSMEG_4014 | N-carbamoyl-L-amino acid amidohydrolas      | E | METABOLISM                         |         | -1.07 | 0.506 | Down |
| MSMEG_1235 | sulfate permease                            | P | METABOLISM                         |         | -1.02 | 0.515 | Down |
| MSMEG_4005 | calcium-binding protein                     | G | METABOLISM                         |         | -1.20 | 0.516 | Down |
| MSMEG_5475 | acetate operon repressor                    | K | INFORMATION STORAGE AND PROCESSING |         | -1.09 | 0.517 | Down |
| MSMEG_1254 | DEAD/DEAH box helicase                      | R | POORLY CHARACTERIZED               |         | -1.10 | 0.522 | Down |
| MSMEG_5291 | long-chain-fatty-acid--CoA ligase           | Q | METABOLISM                         | RV1058  | -1.15 | 0.524 | Down |
| MSMEG_1745 | transcriptional regulator                   | K | INFORMATION STORAGE AND PROCESSING |         | -1.08 | 0.526 | Down |
| MSMEG_3940 | universal stress protein family protein     | T | CELLULAR PROCESSES AND SIGNALING   |         | -1.92 | 0.529 | Down |
| MSMEG_1823 | hypothetical protein                        | I | METABOLISM                         | RV3268  | -1.10 | 0.530 | Down |
| MSMEG_4001 | ribose transporter permease RbsC            | G | METABOLISM                         |         | -1.07 | 0.534 | Down |
| MSMEG_5950 | colanic acid biosynthesis acetyltransferase | R | POORLY CHARACTERIZED               |         | -1.40 | 0.537 | Down |
| MSMEG_3965 | hypothetical protein                        | R | POORLY CHARACTERIZED               |         | -1.26 | 0.538 | Down |
| MSMEG_0777 | F420-dependent glucose-6-phosphate deH      | K | METABOLISM                         | RV0407  | -1.09 | 0.539 | Down |
| MSMEG_3939 | universal stress protein family protein     | T | CELLULAR PROCESSES AND SIGNALING   | RV2624C | -1.82 | 0.542 | Down |
| MSMEG_5458 | cyclic nucleotide-binding protein           | T | CELLULAR PROCESSES AND SIGNALING   | RV0998  | -1.03 | 0.543 | Down |
| MSMEG_6002 | coenzyme A transferase subunit A            | I | METABOLISM                         | RV3551  | -1.23 | 0.544 | Down |

|            |                                          |   |                                    |
|------------|------------------------------------------|---|------------------------------------|
| MSMEG_0390 | acyltransferase                          | I | METABOLISM                         |
| MSMEG_6716 | AP endonuclease, family protein 2        | G | METABOLISM                         |
| ItrA       | low temperature requirement protein LtrA | S | POORLY CHARACTERIZED               |
| MSMEG_4070 | TetR family transcriptional regulator    | K | INFORMATION STORAGE AND PROCESSING |
| MSMEG_4006 | CdaR family transcriptional regulator    | Q | METABOLISM                         |
| ackA       | acetate kinase                           | C | METABOLISM                         |
| MSMEG_2247 | dihydrokaempferol 4-reductase            | G | METABOLISM                         |
| MSMEG_5612 | amino-acid acetyltransferase             | J | INFORMATION STORAGE AND PROCESSING |
| MSMEG_0513 | integral membrane protein                | S | POORLY CHARACTERIZED               |
| MSMEG_1192 | M23 peptidase domain-containing protein  | M | CELLULAR PROCESSES AND SIGNALING   |
| MSMEG_3933 | hypothetical protein                     | R | POORLY CHARACTERIZED               |
| MSMEG_0175 | FAD dependent oxidoreductase             | E | METABOLISM                         |
| MSMEG_6738 | transcriptional regulator YdhC           | K | INFORMATION STORAGE AND PROCESSING |
| MSMEG_5732 | monooxygenase                            | C | METABOLISM                         |

Rv0409

|       |       |      |
|-------|-------|------|
| -1.15 | 0.546 | Down |
| -1.42 | 0.551 | Down |
| -1.36 | 0.552 | Down |
| -1.21 | 0.555 | Down |
| -1.24 | 0.556 | Down |
| -1.26 | 0.568 | Down |
| -1.60 | 0.569 | Down |
| -1.49 | 0.573 | Down |
| -1.52 | 0.577 | Down |
| -1.04 | 0.587 | Down |
| -1.22 | 0.587 | Down |
| -1.09 | 0.604 | Down |
| -1.15 | 0.695 | Down |
| -1.00 | 0.767 | Down |

Table S8. Genes Up / Down regulated in LIX80 (K55M Mut PknK Overexpression Strain at t=96 h)

Upregulated

For filtering upregulation we consider Geomean fold >=1 in treated sample.

Downregulated

For filtering downregulation we consider Geomean fold <=1 in treated sample.

Expression fold values are provided in terms of log base 2

|            |                                                 |          |                                    |           |              |         | LIX80 t96-1 vs. LIX70 t96-1 |  |  |
|------------|-------------------------------------------------|----------|------------------------------------|-----------|--------------|---------|-----------------------------|--|--|
| GeneName   | Product                                         | COG_Code | Function                           | RV Number | geomean_Fold | P-value | Regulation                  |  |  |
| dnaK       | molecular chaperone DnaK                        | O        | CELLULAR PROCESSES AND SIGNALING   | Rv0350    | 1.49         | 0.293   | Up                          |  |  |
| MSMEG_5611 | spore protein                                   | O        | CELLULAR PROCESSES AND SIGNALING   |           | 1.54         | 0.531   | Up                          |  |  |
| sppA       | signal peptide peptidase SppA, 67K type         | U        | CELLULAR PROCESSES AND SIGNALING   | Rv0724    | 1.33         | 0.000   | Up                          |  |  |
| mrsB       | methionine-R-sulfoxide reductase                | O        | CELLULAR PROCESSES AND SIGNALING   | RV2674    | 1.27         | 0.010   | Up                          |  |  |
| MSMEG_4303 | methyltransferase                               | O        | CELLULAR PROCESSES AND SIGNALING   |           | 1.14         | 0.181   | Up                          |  |  |
| MSMEG_0699 | hypothetical protein                            | O        | CELLULAR PROCESSES AND SIGNALING   |           | 1.55         | 0.221   | Up                          |  |  |
| MSMEG_6366 | O-antigen export system, ATP-binding protein    | M        | CELLULAR PROCESSES AND SIGNALING   | Rv3781    | 1.11         | 0.444   | Up                          |  |  |
| MSMEG_1765 | restriction endonuclease                        | V        | CELLULAR PROCESSES AND SIGNALING   |           | 1.28         | 0.115   | Up                          |  |  |
| grpE       | co-chaperone GrpE                               | O        | CELLULAR PROCESSES AND SIGNALING   | Rv0351    | 1.51         | 0.195   | Up                          |  |  |
| clpP       | ATP-dependent Clp protease proteolytic subunit  | U        | CELLULAR PROCESSES AND SIGNALING   | Rv2460c   | 1.50         | 0.197   | Up                          |  |  |
| MSMEG_0732 | chaperone ClpB                                  | O        | CELLULAR PROCESSES AND SIGNALING   | Rv0384c   | 1.38         | 0.260   | Up                          |  |  |
| MSMEG_2553 | TetR family transcriptional regulator           | K        | INFORMATION STORAGE AND PROCESSING |           | 1.08         | 0.344   | Up                          |  |  |
| MSMEG_2652 | iron repressor protein                          | K        | INFORMATION STORAGE AND PROCESSING | Rv2788    | 1.10         | 0.049   | Up                          |  |  |
| MSMEG_1168 | transcriptional regulator                       | K        | INFORMATION STORAGE AND PROCESSING |           | 1.07         | 0.150   | Up                          |  |  |
| MSMEG_0916 | TetR family transcriptional regulator           | K        | INFORMATION STORAGE AND PROCESSING | RV0472C   | 1.32         | 0.180   | Up                          |  |  |
| MSMEG_1025 | TetR family transcriptional regulator           | K        | INFORMATION STORAGE AND PROCESSING |           | 1.08         | 0.183   | Up                          |  |  |
| MSMEG_5651 | LuxR family transcriptional regulator           | K        | INFORMATION STORAGE AND PROCESSING |           | 1.28         | 0.287   | Up                          |  |  |
| MSMEG_6565 | hypothetical protein                            | L        | INFORMATION STORAGE AND PROCESSING | RV0730    | 1.02         | 0.328   | Up                          |  |  |
| MSMEG_5935 | ATP-dependent DNA helicase                      | L        | INFORMATION STORAGE AND PROCESSING |           | 1.05         | 0.334   | Up                          |  |  |
| MSMEG_5723 | endoribonuclease L-psp family protein           | J        | INFORMATION STORAGE AND PROCESSING |           | 1.39         | 0.382   | Up                          |  |  |
| MSMEG_1632 | hypothetical protein                            | L        | INFORMATION STORAGE AND PROCESSING |           | 1.05         | 0.410   | Up                          |  |  |
| MSMEG_4474 | acyl-CoA oxidase                                | I        | METABOLISM                         |           | 1.63         | 0.002   | Up                          |  |  |
| add        | adenosine deaminase                             | F        | METABOLISM                         | Rv3313c   | 1.66         | 0.044   | Up                          |  |  |
| MSMEG_0889 | succinate-semialdehyde dehydrogenase            | C        | METABOLISM                         |           | 1.44         | 0.044   | Up                          |  |  |
| MSMEG_6020 | sugar ABC transporter periplasmic protein       | G        | METABOLISM                         |           | 1.36         | 0.047   | Up                          |  |  |
| MSMEG_5538 | [NADP+] succinate-semialdehyde dehydrogenase    | C        | METABOLISM                         |           | 1.14         | 0.107   | Up                          |  |  |
| MSMEG_1665 | gamma-aminobutyraldehyde dehydrogenase          | C        | METABOLISM                         |           | 1.24         | 0.161   | Up                          |  |  |
| MSMEG_2017 | MerR family transcriptional regulator           | H        | METABOLISM                         |           | 2.20         | 0.164   | Up                          |  |  |
| manB       | phosphomannomutase                              | G        | METABOLISM                         |           | 1.07         | 0.168   | Up                          |  |  |
| rocD       | ornithine-oxo-acid transaminase                 | E        | METABOLISM                         | Rv2321c   | 1.53         | 0.174   | Up                          |  |  |
| MSMEG_5442 | glutamate dehydrogenase                         | E        | METABOLISM                         |           | 1.51         | 0.181   | Up                          |  |  |
| MSMEG_5699 | This family protein                             | H        | METABOLISM                         | Rv0868c   | 1.06         | 0.181   | Up                          |  |  |
| MSMEG_5485 | molybdopterin biosynthesis protein              | H        | METABOLISM                         | Rv0984    | 1.13         | 0.191   | Up                          |  |  |
| MSMEG_3125 | cysteine desulfurase                            | E        | METABOLISM                         | Rv1464    | 1.13         | 0.207   | Up                          |  |  |
| MSMEG_3568 | hypothetical protein                            | P        | METABOLISM                         |           | 1.39         | 0.307   | Up                          |  |  |
| MSMEG_6250 | glutamate-cysteine ligase                       | H        | METABOLISM                         | Rv3704c   | 1.08         | 0.363   | Up                          |  |  |
| cysM       | cysteine synthase B                             | E        | METABOLISM                         | Rv1336    | 1.32         | 0.464   | Up                          |  |  |
| MSMEG_1710 | ribose transporter permease RbsC                | G        | METABOLISM                         |           | 1.15         | 0.014   | Up                          |  |  |
| MSMEG_1712 | ABC transporter periplasmic protein             | G        | METABOLISM                         |           | 1.03         | 0.059   | Up                          |  |  |
| argD       | acetylornithine aminotransferase                | E        | METABOLISM                         | Rv1655    | 1.52         | 0.073   | Up                          |  |  |
| nuoG       | NADH dehydrogenase subunit G                    | C        | METABOLISM                         | Rv3151    | 1.28         | 0.159   | Up                          |  |  |
| MSMEG_0444 | agmatine deiminase                              | E        | METABOLISM                         |           | 1.04         | 0.170   | Up                          |  |  |
| MSMEG_1711 | ABC transporter ATP-binding protein             | G        | METABOLISM                         |           | 1.45         | 0.171   | Up                          |  |  |
| MSMEG_5734 | alpha-methylacyl-CoA racemase                   | C        | METABOLISM                         | Rv0855    | 1.16         | 0.176   | Up                          |  |  |
| MSMEG_5310 | SAM-dependent methyltransferase                 | H        | METABOLISM                         | RV2622    | 1.33         | 0.184   | Up                          |  |  |
| MSMEG_2466 | glutaryl-CoA dehydrogenase                      | I        | METABOLISM                         | Rv0400c   | 1.17         | 0.228   | Up                          |  |  |
| MSMEG_1926 | acid phosphatase                                | G        | METABOLISM                         | Rv3214    | 1.21         | 0.239   | Up                          |  |  |
| MSMEG_1180 | allantoate amidohydrolase                       | E        | METABOLISM                         |           | 1.15         | 0.242   | Up                          |  |  |
| cysA       | sulfate ABC transporter ATP-binding protein     | P        | METABOLISM                         |           | 1.25         | 0.274   | Up                          |  |  |
| MSMEG_1387 | acyl-CoA dehydrogenase                          | I        | METABOLISM                         | Rv0672    | 1.26         | 0.307   | Up                          |  |  |
| MSMEG_5145 | extracellular solute-binding protein            | G        | METABOLISM                         |           | 1.35         | 0.316   | Up                          |  |  |
| MSMEG_0894 | dihydrodipicolinate reductase                   | E        | METABOLISM                         |           | 1.23         | 0.321   | Up                          |  |  |
| nuoK       | NADH dehydrogenase subunit K                    | C        | METABOLISM                         | Rv3155    | 1.06         | 0.342   | Up                          |  |  |
| MSMEG_5014 | ATPase P                                        | P        | METABOLISM                         |           | 1.19         | 0.391   | Up                          |  |  |
| MSMEG_1124 | ferredoxin FdxA                                 | C        | METABOLISM                         |           | 1.27         | 0.415   | Up                          |  |  |
| MSMEG_0159 | formate dehydrogenase subunit gamma             | C        | METABOLISM                         |           | 1.50         | 0.442   | Up                          |  |  |
| ehuC       | ectoine/hydroxyectoine ABC transporter permease | E        | METABOLISM                         |           | 1.03         | 0.453   | Up                          |  |  |
| MSMEG_5366 | hypothetical protein                            | G        | METABOLISM                         |           | 1.39         | 0.516   | Up                          |  |  |
| MSMEG_5608 | acetyl-CoA acetyltransferase                    | I        | METABOLISM                         | RV0914C   | 1.00         | 0.633   | Up                          |  |  |
| MSMEG_0836 | carboxylate-amine ligase                        | S        | POORLY CHARACTERIZED               | RV0433    | 1.19         | 0.030   | Up                          |  |  |
| ahpD       | alkylhydroperoxidase                            | S        | POORLY CHARACTERIZED               | Rv2429    | 1.20         | 0.074   | Up                          |  |  |
| MSMEG_0399 | hypothetical protein                            | S        | POORLY CHARACTERIZED               | Rv2377c   | 1.25         | 0.260   | Up                          |  |  |
| MSMEG_6399 | antigen 85-C                                    | R        | POORLY CHARACTERIZED               |           | 1.70         | 0.363   | Up                          |  |  |
| MSMEG_5511 | von Willebrand factor A                         | R        | POORLY CHARACTERIZED               | RV0959    | 1.07         | 0.423   | Up                          |  |  |
| MSMEG_2026 | short chain dehydrogenase                       | R        | POORLY CHARACTERIZED               |           | 1.15         | 0.025   | Up                          |  |  |
| MSMEG_1984 | haloacetate dehalogenase H-1                    | R        | POORLY CHARACTERIZED               | Rv0134    | 1.45         | 0.113   | Up                          |  |  |
| MSMEG_2254 | oxalate decarboxylase OxdC                      | R        | POORLY CHARACTERIZED               |           | 1.17         | 0.118   | Up                          |  |  |
| MSMEG_1959 | hypothetical protein                            | S        | POORLY CHARACTERIZED               | RV3193C   | 1.02         | 0.139   | Up                          |  |  |
| MSMEG_6278 | metallo-beta-lactamase superfamily protein      | R        | POORLY CHARACTERIZED               |           | 1.03         | 0.283   | Up                          |  |  |

|            |                                             |          |                                    |           |              |         | LIX80 t96-1 vs. LIX70 t96-1 |  |  |
|------------|---------------------------------------------|----------|------------------------------------|-----------|--------------|---------|-----------------------------|--|--|
| GeneName   | Product                                     | COG_Code | Function                           | RV Number | geomean_Fold | P-value | Regulation                  |  |  |
| MSMEG_5661 | ABC transporter ATP-binding protein         | V        | CELLULAR PROCESSES AND SIGNALING   |           | -1.18        | 0.357   | Down                        |  |  |
| MSMEG_2855 | virulence factor Mce family protein         | Q        | METABOLISM                         |           | -1.91        | 0.472   | Down                        |  |  |
| MSMEG_4743 | hypothetical protein                        | S        | POORLY CHARACTERIZED               |           | -1.28        | 0.022   | Down                        |  |  |
| MSMEG_5177 | TetR family transcriptional regulator       | K        | INFORMATION STORAGE AND PROCESSING |           | -1.03        | 0.134   | Down                        |  |  |
| MSMEG_0782 | class III aminotransferase                  | E        | METABOLISM                         |           | -1.05        | 0.500   | Down                        |  |  |
| MSMEG_3460 | ferric uptake regulation protein            | P        | METABOLISM                         |           | -1.13        | 0.524   | Down                        |  |  |
| MSMEG_1742 | oxidoreductase                              | C        | METABOLISM                         |           | -1.29        | 0.578   | Down                        |  |  |
| MSMEG_6854 | 3-isopropylmalate dehydratase large subunit | E        | METABOLISM                         |           | -1.03        | 0.009   | Down                        |  |  |
| rpoZ       | DNA-directed RNA polymerase subunit omega   | K        | INFORMATION STORAGE AND PROCESSING | Rv1390    | -1.25        | 0.020   | Down                        |  |  |
| MSMEG_3427 | metal dependent hydrolase                   | R        | POORLY CHARACTERIZED               |           | -1.19        | 0.062   | Down                        |  |  |

|            |                                                         |   |                                    |         |       |       |      |
|------------|---------------------------------------------------------|---|------------------------------------|---------|-------|-------|------|
| MSMEG_3357 | metal-dependent phosphohydrolase                        | R | POORLY CHARACTERIZED               |         | -1.25 | 0.158 | Down |
| MSMEG_3936 | universal stress protein family protein                 | T | CELLULAR PROCESSES AND SIGNALING   |         | -1.98 | 0.231 | Down |
| MSMEG_3933 | hypothetical protein                                    | R | POORLY CHARACTERIZED               |         | -2.20 | 0.235 | Down |
| MSMEG_0568 | radical SAM domain-containing protein                   | R | POORLY CHARACTERIZED               |         | -2.30 | 0.287 | Down |
| ampC       | beta-lactamase                                          | V | CELLULAR PROCESSES AND SIGNALING   |         | -1.21 | 0.327 | Down |
| MSMEG_3953 | hypothetical protein                                    | I | METABOLISM                         | Rv0533c | -2.74 | 0.345 | Down |
| MSMEG_3939 | universal stress protein family protein                 | T | CELLULAR PROCESSES AND SIGNALING   | RV2624c | -1.90 | 0.354 | Down |
| MSMEG_6833 | alcohol dehydrogenase                                   | R | POORLY CHARACTERIZED               |         | -1.70 | 0.360 | Down |
| MSMEG_4533 | sulfate-binding protein                                 | P | METABOLISM                         | Rv2400c | -1.73 | 0.391 | Down |
| MSMEG_1756 | endonuclease VIII                                       | L | INFORMATION STORAGE AND PROCESSING | Rv3297  | -1.84 | 0.399 | Down |
| MSMEG_3948 | acyltransferase                                         | R | POORLY CHARACTERIZED               |         | -1.09 | 0.407 | Down |
| coaB       | bifunctional phosphopantothienoylcysteine decarboxylase | H | METABOLISM                         |         | -1.82 | 0.415 | Down |
| MSMEG_4386 | ABC transporter permease                                | P | METABOLISM                         |         | -1.02 | 0.428 | Down |
| MSMEG_4859 | oxidoreductase, short chain dehydrogenase/reductase     | R | POORLY CHARACTERIZED               |         | -1.76 | 0.437 | Down |
| MSMEG_1192 | M23 peptidase domain-containing protein                 | M | CELLULAR PROCESSES AND SIGNALING   |         | -1.23 | 0.438 | Down |
| MSMEG_3954 | trehalose 6-phosphate phosphorylase                     | G | METABOLISM                         |         | -1.21 | 0.443 | Down |
| MSMEG_3945 | universal stress protein family protein                 | T | CELLULAR PROCESSES AND SIGNALING   |         | -2.08 | 0.458 | Down |
| MSMEG_0400 | peptide synthetase                                      | Q | METABOLISM                         |         | -2.62 | 0.464 | Down |
| MSMEG_2598 | short chain dehydrogenase                               | R | POORLY CHARACTERIZED               | RV2857c | -1.46 | 0.468 | Down |
| MSMEG_2545 | ribosomal RNA large subunit methyltransferase N         | R | POORLY CHARACTERIZED               |         | -2.15 | 0.475 | Down |
| MSMEG_6496 | nitrate/sulfonate/bicarbonate ABC transporter ATPase    | P | METABOLISM                         |         | -1.92 | 0.478 | Down |
| MSMEG_3940 | universal stress protein family protein                 | T | CELLULAR PROCESSES AND SIGNALING   |         | -2.29 | 0.494 | Down |
| MSMEG_3930 | [NiFe] hydrogenase subunit gamma                        | C | METABOLISM                         |         | -1.40 | 0.498 | Down |
| MSMEG_3947 | 6-phosphofructokinase                                   | G | METABOLISM                         | RV2029c | -2.20 | 0.503 | Down |
| MSMEG_3931 | [NiFe] hydrogenase subunit beta                         | C | METABOLISM                         |         | -1.35 | 0.544 | Down |
| MSMEG_1249 | ISMsm7, transposase orfB                                | L | INFORMATION STORAGE AND PROCESSING |         | -1.14 | 0.549 | Down |
| MSMEG_5732 | monooxygenase                                           | C | METABOLISM                         |         | -1.59 | 0.552 | Down |
| MSMEG_6738 | transcriptional regulator YdhC                          | K | INFORMATION STORAGE AND PROCESSING |         | -1.91 | 0.567 | Down |
| MSMEG_2247 | dihydrokaempferol 4-reductase                           | G | METABOLISM                         |         | -1.38 | 0.570 | Down |
| MSMEG_3944 | two component transcriptional regulatory protein d      | K | INFORMATION STORAGE AND PROCESSING | Rv3133c | -1.11 | 0.573 | Down |
| MSMEG_3942 | hypothetical protein                                    | S | POORLY CHARACTERIZED               | RV2004c | -2.63 | 0.584 | Down |
| MSMEG_3932 | hypothetical protein                                    | O | CELLULAR PROCESSES AND SIGNALING   | RV2031c | -1.93 | 0.620 | Down |
| MSMEG_6870 | creatinine amidohydrolase                               | R | POORLY CHARACTERIZED               |         | -1.01 | 0.733 | Down |
| rpmD       | 50S ribosomal protein L30                               | J | INFORMATION STORAGE AND PROCESSING | Rv0722  | -1.11 | 0.009 | Down |
| MSMEG_6853 | 3-isopropylmalate dehydratase small subunit             | E | METABOLISM                         |         | -1.48 | 0.011 | Down |
| MSMEG_3845 | hypothetical protein                                    | S | POORLY CHARACTERIZED               |         | -1.01 | 0.028 | Down |
| MSMEG_5221 | N-acetyltransferase GCN5                                | J | INFORMATION STORAGE AND PROCESSING |         | -1.13 | 0.048 | Down |
| MSMEG_5603 | ArsR family transcriptional regulator                   | K | INFORMATION STORAGE AND PROCESSING | Rv1994c | -1.05 | 0.078 | Down |
| MSMEG_2651 | alkanesulfonate monooxygenase                           | C | METABOLISM                         |         | -1.77 | 0.084 | Down |
| MSMEG_2264 | peptidase M52, hydrogen uptake protein                  | C | METABOLISM                         |         | -1.01 | 0.088 | Down |
| rplN       | 50S ribosomal protein L14                               | J | INFORMATION STORAGE AND PROCESSING | Rv0714  | -1.03 | 0.092 | Down |
| MSMEG_1348 | RNA polymerase ECF-subfamily protein sigma factor       | K | INFORMATION STORAGE AND PROCESSING |         | -1.27 | 0.095 | Down |
| MSMEG_3297 | CadC family transcriptional regulator                   | K | INFORMATION STORAGE AND PROCESSING |         | -1.16 | 0.112 | Down |
| MSMEG_5920 | FMN-dependent monooxygenase                             | C | METABOLISM                         | RV3520c | -1.27 | 0.124 | Down |
| scpA       | segregation and condensation protein A                  | S | POORLY CHARACTERIZED               |         | -1.23 | 0.126 | Down |
| rplO       | 50S ribosomal protein L15                               | J | INFORMATION STORAGE AND PROCESSING | Rv0723  | -1.57 | 0.134 | Down |
| MSMEG_6195 | ion-transporting ATPase                                 | P | METABOLISM                         | RV3680  | -1.09 | 0.135 | Down |
| MSMEG_5373 | nitrilase 2                                             | R | POORLY CHARACTERIZED               |         | -1.31 | 0.166 | Down |
| MSMEG_4984 | hypothetical protein                                    | Q | METABOLISM                         | RV1532c | -1.19 | 0.175 | Down |
| MSMEG_4033 | TetR family transcriptional regulator                   | K | INFORMATION STORAGE AND PROCESSING |         | -1.27 | 0.178 | Down |
| MSMEG_4126 | hydrolase, isochorismatase                              | Q | METABOLISM                         |         | -1.39 | 0.203 | Down |
| MSMEG_1445 | 30S ribosomal protein S17                               | J | INFORMATION STORAGE AND PROCESSING | Rv0710  | -1.23 | 0.220 | Down |
| MSMEG_3843 | hypothetical protein                                    | R | POORLY CHARACTERIZED               | RV1628c | -1.08 | 0.222 | Down |
| MSMEG_0502 | glucosidase                                             | G | METABOLISM                         |         | -1.10 | 0.247 | Down |
| MSMEG_2857 | virulence factor Mce family protein                     | Q | METABOLISM                         |         | -1.05 | 0.277 | Down |
| MSMEG_5851 | esterase                                                | R | POORLY CHARACTERIZED               | RV0774c | -1.10 | 0.300 | Down |
| MSMEG_2994 | amidohydrolase                                          | R | POORLY CHARACTERIZED               |         | -1.16 | 0.303 | Down |
| MSMEG_0283 | short chain dehydrogenase                               | R | POORLY CHARACTERIZED               |         | -1.04 | 0.304 | Down |
| MSMEG_4463 | CalRS protein                                           | R | POORLY CHARACTERIZED               | RV2314c | -1.25 | 0.308 | Down |
| MSMEG_0649 | phosphonate-binding periplasmic protein                 | P | METABOLISM                         |         | -1.23 | 0.309 | Down |
| MSMEG_1914 | RNA polymerase sigma-70 factor, family protein          | K | INFORMATION STORAGE AND PROCESSING |         | -1.24 | 0.311 | Down |
| MSMEG_2794 | GntR family transcriptional regulator                   | K | INFORMATION STORAGE AND PROCESSING |         | -1.69 | 0.340 | Down |
| MSMEG_2279 | 3-hydroxyacyl-CoA dehydrogenase                         | R | POORLY CHARACTERIZED               |         | -1.25 | 0.345 | Down |
| lysS       | lysyl-tRNA synthetase                                   | J | INFORMATION STORAGE AND PROCESSING |         | -1.06 | 0.376 | Down |
| rplC       | 50S ribosomal protein L3                                | J | INFORMATION STORAGE AND PROCESSING | Rv0701  | -1.27 | 0.389 | Down |
| rpsI       | 30S ribosomal protein S9                                | J | INFORMATION STORAGE AND PROCESSING | RV3442c | -1.15 | 0.397 | Down |
| MSMEG_1148 | mce related protein                                     | Q | METABOLISM                         |         | -1.33 | 0.401 | Down |
| MSMEG_1501 | methyltransferase, family protein                       | Q | METABOLISM                         | RV2751  | -1.27 | 0.419 | Down |
| MSMEG_4737 | hypothetical protein                                    | S | POORLY CHARACTERIZED               |         | -1.20 | 0.426 | Down |
| rnpA       | ribonuclease P protein component                        | J | INFORMATION STORAGE AND PROCESSING | RV3923c | -1.34 | 0.429 | Down |
| MSMEG_3306 | zinc-binding alcohol dehydrogenase                      | R | POORLY CHARACTERIZED               | RV1912c | -1.18 | 0.432 | Down |
| cobS       | cobalamin synthase                                      | H | METABOLISM                         | RV2208  | -1.34 | 0.432 | Down |
| pdxH       | pyridoxamine 5'-phosphate oxidase                       | H | METABOLISM                         | RV2607  | -1.26 | 0.443 | Down |
| MSMEG_6396 | antigen 85-C                                            | R | POORLY CHARACTERIZED               |         | -1.17 | 0.456 | Down |
| MSMEG_4987 | glycosyl transferase family protein                     | M | CELLULAR PROCESSES AND SIGNALING   |         | -1.65 | 0.459 | Down |
| MSMEG_0970 | phosphoglycerate mutase                                 | G | METABOLISM                         | RV0525  | -1.29 | 0.464 | Down |
| MSMEG_1144 | virulence factor Mce family protein                     | Q | METABOLISM                         |         | -1.03 | 0.467 | Down |
| MSMEG_5120 | hypothetical protein                                    | Q | METABOLISM                         | RV1186c | -1.04 | 0.471 | Down |
| rplT       | 50S ribosomal protein L20                               | J | INFORMATION STORAGE AND PROCESSING | Rv1643  | -1.10 | 0.473 | Down |
| MSMEG_1230 | hypothetical protein                                    | S | POORLY CHARACTERIZED               | RV2273  | -1.10 | 0.473 | Down |
| MSMEG_1595 | oxidoreductase                                          | R | POORLY CHARACTERIZED               |         | -1.06 | 0.475 | Down |
| MSMEG_5536 | chorismate mutase                                       | E | METABOLISM                         | RV0948C | -1.13 | 0.483 | Down |
| rplP       | 50S ribosomal protein L16                               | J | INFORMATION STORAGE AND PROCESSING | Rv0708  | -1.57 | 0.485 | Down |
| infA       | translation initiation factor IF-1                      | J | INFORMATION STORAGE AND PROCESSING | RV3462c | -1.01 | 0.487 | Down |
| MSMEG_5882 | carbon monoxide dehydrogenase                           | C | METABOLISM                         |         | -1.13 | 0.489 | Down |
| MSMEG_5733 | universal stress protein family protein                 | T | CELLULAR PROCESSES AND SIGNALING   |         | -1.80 | 0.504 | Down |
| MSMEG_6182 | hypothetical protein                                    | S | POORLY CHARACTERIZED               | RV3669  | -1.09 | 0.512 | Down |
| MSMEG_6422 | ferritin family protein                                 | P | METABOLISM                         | RV3841  | -1.74 | 0.514 | Down |
| MSMEG_1818 | membrane flanked domain-containing protein              | S | POORLY CHARACTERIZED               | RV3278C | -1.39 | 0.516 | Down |
| MSMEG_5897 | virulence factor mce family protein                     | Q | METABOLISM                         | RV3496c | -1.14 | 0.516 | Down |
| MSMEG_1640 | ATP/GTP-binding protein                                 | R | POORLY CHARACTERIZED               | RV3362c | -1.11 | 0.519 | Down |
| MSMEG_1679 | AmiB protein                                            | R | POORLY CHARACTERIZED               |         | -1.46 | 0.527 | Down |
| rpmJ       | 50S ribosomal protein L36                               | J | INFORMATION STORAGE AND PROCESSING | RV3461c | -1.36 | 0.531 | Down |
| MSMEG_6223 | TetR family transcriptional regulator                   | K | INFORMATION STORAGE AND PROCESSING |         | -1.19 | 0.538 | Down |
| MSMEG_5245 | universal stress protein family protein                 | T | CELLULAR PROCESSES AND SIGNALING   | RV2028C | -1.06 | 0.545 | Down |
| lipA       | lipoyl synthase                                         | H | METABOLISM                         | RV2218  | -1.10 | 0.548 | Down |
| MSMEG_1942 | integral membrane protein                               | S | POORLY CHARACTERIZED               |         | -1.04 | 0.548 | Down |

|            |                                                 |   |                                    |         |       |       |      |
|------------|-------------------------------------------------|---|------------------------------------|---------|-------|-------|------|
| MSMEG_1680 | hypothetical protein                            | S | POORLY CHARACTERIZED               |         | -1.09 | 0.556 | Down |
| rpmA       | 50S ribosomal protein L27                       | J | INFORMATION STORAGE AND PROCESSING | Rv2441c | -1.04 | 0.563 | Down |
| rpmC       | 50S ribosomal protein L29                       | J | INFORMATION STORAGE AND PROCESSING | Rv0709  | -1.64 | 0.563 | Down |
| rpsG       | 30S ribosomal protein S7                        | J | INFORMATION STORAGE AND PROCESSING | Rv0683  | -1.37 | 0.564 | Down |
| MSMEG_5243 | hypothetical protein                            | R | POORLY CHARACTERIZED               |         | -2.72 | 0.571 | Down |
| MSMEG_3950 | universal stress protein family protein         | T | CELLULAR PROCESSES AND SIGNALING   | RV2026C | -2.38 | 0.576 | Down |
| rho        | transcription termination factor Rho            | K | INFORMATION STORAGE AND PROCESSING | Rv1297  | -1.27 | 0.586 | Down |
| MSMEG_5469 | GNAT family acetyltransferase                   | J | INFORMATION STORAGE AND PROCESSING | Rv0995  | -1.05 | 0.611 | Down |
| MSMEG_2728 | glutamate transport ATP-binding protein GluA    | E | METABOLISM                         |         | -1.45 | 0.612 | Down |
| MSMEG_3280 | polyamine-binding lipoprotein                   | E | METABOLISM                         |         | -1.10 | 0.617 | Down |
| MSMEG_0639 | oligopeptide transport ATP-binding protein AppF | E | METABOLISM                         |         | -1.25 | 0.633 | Down |
| aspA       | aspartate ammonia-lyase                         | E | METABOLISM                         |         | -1.19 | 0.653 | Down |
| MSMEG_1681 | endoribonuclease L-PSP superfamily protein      | J | INFORMATION STORAGE AND PROCESSING |         | -1.22 | 0.654 | Down |
| MSMEG_4568 | ribonuclease Z                                  | R | POORLY CHARACTERIZED               |         | -1.06 | 0.678 | Down |
| MSMEG_5244 | DevR family transcriptional regulator           | K | INFORMATION STORAGE AND PROCESSING |         | -1.76 | 0.683 | Down |
| MSMEG_5136 | hypothetical protein                            | R | POORLY CHARACTERIZED               | RV0080  | -1.07 | 0.707 | Down |

| Table S9: List of Genes that are Up/Down regulated in LIX79 (WT PknK Overexpression Strain) but not in LIX80 (K55M Mutant PknK Overexpression Strain) at 96 hr post induction with Acetamide |          |           |                          |                          |                                                       |
|----------------------------------------------------------------------------------------------------------------------------------------------------------------------------------------------|----------|-----------|--------------------------|--------------------------|-------------------------------------------------------|
| GeoMean-Fold Values of 2 Replicates is provided                                                                                                                                              |          |           |                          |                          |                                                       |
| Cut off used to filter up and down regulated genes                                                                                                                                           |          |           |                          |                          |                                                       |
| <b>Upregulated</b>                                                                                                                                                                           |          |           |                          |                          |                                                       |
| For filtering upregulation we consider Geomean fold >=1 in treated sample.                                                                                                                   |          |           |                          |                          |                                                       |
| <b>Downregulated</b>                                                                                                                                                                         |          |           |                          |                          |                                                       |
| For filtering downregulation we consider Geomean fold <=-1 in treated sample.                                                                                                                |          |           |                          |                          |                                                       |
| Expression fold values are provided in terms of log base 2                                                                                                                                   |          |           |                          |                          |                                                       |
| GeneName                                                                                                                                                                                     | COG_Code | RV Number | Geofold Mean<br>LIX79/70 | Geofold Mean<br>LIX80/70 | Product                                               |
| MSMEG_2698                                                                                                                                                                                   | Q        | RV2740    | 3.23                     | -0.77                    | hypothetical protein                                  |
| MSMEG_4685                                                                                                                                                                                   | R        |           | 2.97                     | -0.17                    | oxidoreductase                                        |
| MSMEG_2469                                                                                                                                                                                   | Q        |           | 2.92                     | -0.04                    | AMP-dependent synthetase/ligase                       |
| MSMEG_2416                                                                                                                                                                                   | D        | RV2927C   | 2.91                     | 0.76                     | hypothetical protein                                  |
| selB                                                                                                                                                                                         | J        |           | 2.79                     | -0.18                    | selenocysteine-specific translation elongation factor |
| MSMEG_6585                                                                                                                                                                                   | I        |           | 2.76                     | 0.42                     | acyl-CoA dehydrogenase                                |
| MSMEG_3241                                                                                                                                                                                   | S        |           | 2.75                     | 0.19                     | hypothetical protein                                  |
| MSMEG_3580                                                                                                                                                                                   | R        | Rv0129c   | 2.63                     | -0.03                    | antigen 85-C                                          |
| MSMEG_0996                                                                                                                                                                                   | S        | RV0540    | 2.60                     | -0.43                    | hypothetical protein                                  |
| MSMEG_2120                                                                                                                                                                                   | K        |           | 2.48                     | -0.47                    | hypothetical protein                                  |
| MSMEG_2421                                                                                                                                                                                   | O        | RV2923C   | 2.45                     | -0.12                    | hypothetical protein                                  |
| MSMEG_6096                                                                                                                                                                                   | K        |           | 2.45                     | -0.06                    | pantothenate kinase                                   |
| MSMEG_0617                                                                                                                                                                                   | D        |           | 2.40                     | -0.29                    | ftsk/SpoIIIE family protein                           |
| MSMEG_2488                                                                                                                                                                                   | C        |           | 2.40                     | -0.23                    | [NADP+] succinate-semialdehyde dehydrogenase          |
| MSMEG_0985                                                                                                                                                                                   | G        | Rv3476c   | 2.39                     | -0.36                    | sugar transporter family protein                      |
| MSMEG_6275                                                                                                                                                                                   | L        | Rv3711c   | 2.39                     | -0.24                    | DNA polymerase III subunit epsilon                    |
| MSMEG_3173                                                                                                                                                                                   | J        | Rv1538c   | 2.39                     | 0.33                     | L-asparaginase                                        |
| MSMEG_1854                                                                                                                                                                                   | O        |           | 2.39                     | -0.02                    | valosin containing protein-1                          |
| MSMEG_4470                                                                                                                                                                                   | R        | RV2326C   | 2.39                     | -0.87                    | ABC transporter                                       |
| MSMEG_1378                                                                                                                                                                                   | G        |           | 2.34                     | 0.06                     | 1-phosphofructokinase                                 |
| MSMEG_6583                                                                                                                                                                                   | R        |           | 2.31                     | -0.39                    | antigen 85-C                                          |
| MSMEG_4579                                                                                                                                                                                   | G        | RV2419C   | 2.30                     | -0.80                    | phosphoglycerate mutase                               |
| MSMEG_3852                                                                                                                                                                                   | P        |           | 2.30                     | -0.09                    | aliphatic sulfonate binding protein                   |
| MSMEG_3191                                                                                                                                                                                   | J        | RV1571    | 2.30                     | -0.87                    | hypothetical protein                                  |
| MSMEG_0970                                                                                                                                                                                   | G        | RV0525    | 2.28                     | -1.29                    | phosphoglycerate mutase                               |
| eutC                                                                                                                                                                                         | E        |           | 2.28                     | 0.01                     | ethanolamine ammonia-lyase small subunit              |
| MSMEG_0231                                                                                                                                                                                   | S        | RV1898    | 2.23                     | -0.01                    | hypothetical protein                                  |
| MSMEG_0993                                                                                                                                                                                   | T        |           | 2.20                     | -0.10                    | histidine kinase                                      |
| phhB                                                                                                                                                                                         | H        |           | 2.19                     | 0.06                     | pterin-4-alpha-carbinolamine dehydratase              |
| cIpS                                                                                                                                                                                         | S        |           | 2.19                     | 0.18                     | ATP-dependent Clp protease adaptor protein ClpS       |
| MSMEG_3505                                                                                                                                                                                   | J        |           | 2.19                     | -0.40                    | 6-aminohexanoate-cyclic-dimer hydrolase               |
| MSMEG_6931                                                                                                                                                                                   | K        | Rv3911    | 2.17                     | -0.41                    | RNA polymerase sigma-70 factor                        |
| lexA                                                                                                                                                                                         | T        | Rv2720    | 2.16                     | -0.33                    | LexA repressor                                        |

|            |   |         |      |       |                                                                        |  |  |  |  |
|------------|---|---------|------|-------|------------------------------------------------------------------------|--|--|--|--|
| MSMEG_5019 | K |         | 2.16 | 0.88  | regulatory protein                                                     |  |  |  |  |
| MSMEG_2489 | K |         | 2.16 | 0.14  | GntR family transcriptional regulator                                  |  |  |  |  |
| hrpA       | L |         | 2.16 | -0.58 | ATP-dependent helicase HrpA                                            |  |  |  |  |
| MSMEG_3668 | I |         | 2.15 | -0.34 | acyl-CoA dehydrogenase                                                 |  |  |  |  |
| MSMEG_4477 | R | Rv1900c | 2.14 | 0.23  | hydrolase, alpha/beta hydrolase fold family protein                    |  |  |  |  |
| MSMEG_5673 | K |         | 2.13 | -0.17 | transcriptional regulator                                              |  |  |  |  |
| MSMEG_3885 | L | Rv2092c | 2.13 | 0.27  | DEAD/DEAH box helicase                                                 |  |  |  |  |
| MSMEG_4519 | I |         | 2.13 | 0.66  | NrtC protein                                                           |  |  |  |  |
| MSMEG_3116 | G |         | 2.11 | 0.07  | inositol-1-monophosphatase                                             |  |  |  |  |
| glnD       | O | Rv2918c | 2.10 | -0.13 | PII uridylyl-transferase                                               |  |  |  |  |
| MSMEG_2731 | D | RV2731  | 2.08 | -0.12 | DNA repair ATPase                                                      |  |  |  |  |
| MSMEG_0968 | Q |         | 2.08 | -0.22 | cytochrome P450                                                        |  |  |  |  |
| MSMEG_5706 | L | Rv0861c | 2.07 | -0.35 | DNA or RNA helicase of superfamily protein II                          |  |  |  |  |
| thrC       | E | Rv1295  | 2.07 | -0.91 | threonine synthase                                                     |  |  |  |  |
| gabD2      | C | Rv1731  | 2.06 | -0.11 | succinate-semialdehyde dehydrogenase                                   |  |  |  |  |
| MSMEG_6392 | Q | Rv3800c | 2.06 | -0.47 | polyketide synthase                                                    |  |  |  |  |
| xylB       | G |         | 2.06 | 0.52  | xylulokinase                                                           |  |  |  |  |
| MSMEG_1932 | S | RV3209  | 2.05 | -0.51 | MmpS3 protein                                                          |  |  |  |  |
| MSMEG_4253 | M | Rv0557  | 2.05 | 0.47  | glycoside hydrolase family protein                                     |  |  |  |  |
| MSMEG_2033 | R | Rv3141  | 2.04 | 0.48  | oxidoreductase, zinc-binding dehydrogenase                             |  |  |  |  |
| trpD       | E | Rv2192c | 2.04 | -0.03 | anthranilate phosphoribosyltransferase                                 |  |  |  |  |
| MSMEG_6582 | C |         | 2.04 | -0.53 | pyridine nucleotide-disulfide oxidoreductase domain-containing protein |  |  |  |  |
| MSMEG_2632 | H |         | 2.02 | 0.68  | SAM-dependent methyltransferase                                        |  |  |  |  |
| MSMEG_5074 | K | RV1219C | 2.02 | 0.48  | transcriptional regulatory protein                                     |  |  |  |  |
| MSMEG_4524 | H | Rv2386c | 2.02 | 0.22  | salicylate synthase MbtI                                               |  |  |  |  |
| MSMEG_3119 | V | RV1458C | 2.02 | -0.14 | ABC transporter ATP-binding protein                                    |  |  |  |  |
| MSMEG_0929 | S | RV0483  | 2.01 | 0.44  | ErfK/YbiS/Ycfs/YnhG family protein                                     |  |  |  |  |
| MSMEG_6926 | J |         | 2.01 | 0.46  | tRNA adenylyltransferase                                               |  |  |  |  |
| MSMEG_2106 | K |         | 1.99 | -0.17 | transcriptional regulator                                              |  |  |  |  |
| mnmA       | J |         | 1.98 | 0.74  | tRNA-specific 2-thiouridylase MnmA                                     |  |  |  |  |
| MSMEG_1646 | J |         | 1.98 | -0.01 | ribosomal RNA adenine dimethylase                                      |  |  |  |  |
| MSMEG_3029 | U | RV2551C | 1.97 | -0.12 | peptidase, A24 (type IV prepilin peptidase) family protein             |  |  |  |  |
| MSMEG_3290 | R |         | 1.97 | -0.62 | regulatory protein                                                     |  |  |  |  |
| MSMEG_1292 | C |         | 1.97 | -0.05 | FAD binding domain-containing protein                                  |  |  |  |  |
| MSMEG_0763 | R |         | 1.96 | -0.14 | antibiotic transporter                                                 |  |  |  |  |
| murD       | M | Rv2155c | 1.96 | -0.28 | UDP-N-acetylmuramoyl-L-alanyl-D-glutamate synthetase                   |  |  |  |  |
| MSMEG_4469 | P | RV2325C | 1.94 | 0.07  | cobalt transporter                                                     |  |  |  |  |
| MSMEG_2405 | E |         | 1.94 | 0.38  | MarR family transcriptional regulator                                  |  |  |  |  |
| MSMEG_4305 | G | RV2228C | 1.94 | 0.28  | bifunctional RNase H/acid phosphatase                                  |  |  |  |  |
| MSMEG_6221 | S | RV3694C | 1.94 | -0.11 | integral membrane protein                                              |  |  |  |  |
| MSMEG_3786 | E |         | 1.93 | 0.42  | D-amino acid deaminase                                                 |  |  |  |  |
| MSMEG_1945 | P | RV3200C | 1.92 | -0.05 | ion channel membrane protein                                           |  |  |  |  |
| MSMEG_3062 | S |         | 1.91 | -0.58 | hypothetical protein                                                   |  |  |  |  |
| MSMEG_6174 | K |         | 1.91 | 0.21  | IclR family transcriptional regulator                                  |  |  |  |  |
| MSMEG_4576 | O |         | 1.90 | -0.88 | SpfH domain-containing protein                                         |  |  |  |  |
| MSMEG_2597 | C | Rv2858c | 1.90 | -0.48 | aldehyde dehydrogenase                                                 |  |  |  |  |
| xerC       | L | Rv2894c | 1.90 | -0.21 | site-specific tyrosine recombinase XerC                                |  |  |  |  |
| MSMEG_1689 | R |         | 1.90 | -0.35 | 3-oxoacyl-ACP reductase                                                |  |  |  |  |
| MSMEG_3607 | R |         | 1.89 | 0.67  | short chain dehydrogenase                                              |  |  |  |  |



|            |   |         |      |       |                                                                        |  |  |  |  |
|------------|---|---------|------|-------|------------------------------------------------------------------------|--|--|--|--|
| dut        | F | Rv2697c | 1.89 | -0.35 | deoxyuridine 5'-triphosphate nucleotidohydrolase                       |  |  |  |  |
| MSMEG_4299 | I |         | 1.89 | -0.23 | enoyl-CoA hydratase/isomerase                                          |  |  |  |  |
| MSMEG_3203 | E |         | 1.88 | -0.33 | transporter LysE family protein                                        |  |  |  |  |
| MSMEG_4659 | K |         | 1.87 | -0.45 | GntR family transcriptional regulator                                  |  |  |  |  |
| MSMEG_2353 | G |         | 1.87 | -0.03 | hypothetical protein                                                   |  |  |  |  |
| MSMEG_6171 | D | RV3660C | 1.86 | 0.20  | hypothetical protein                                                   |  |  |  |  |
| MSMEG_2402 | R | RV2974C | 1.86 | 0.50  | dihydroxyacetone kinase                                                |  |  |  |  |
| MSMEG_0984 | R |         | 1.86 | -0.38 | trap transporter 4tm/12tm fusion protein                               |  |  |  |  |
| MSMEG_2426 | E | Rv2919c | 1.85 | 0.49  | nitrogen regulatory protein P-II                                       |  |  |  |  |
| MSMEG_3570 | S |         | 1.84 | -0.02 | hypothetical protein                                                   |  |  |  |  |
| cobT       | H | Rv2207  | 1.84 | -0.17 | nicotinate-nucleotide--dimethylbenzimidazole phosphoribosyltransferase |  |  |  |  |
| MSMEG_0064 | N | Rv3873  | 1.83 | 0.11  | PPE family protein                                                     |  |  |  |  |
| MSMEG_5470 | H | Rv0994  | 1.82 | -0.60 | molybdopterin biosynthesis protein MoeA 1                              |  |  |  |  |
| crcB       | D |         | 1.82 | 0.74  | camphor resistance protein CrcB                                        |  |  |  |  |
| MSMEG_1760 | R | RV0851C | 1.82 | 0.34  | short-chain dehydrogenase/reductase SDR                                |  |  |  |  |
| MSMEG_6230 | I |         | 1.81 | -0.69 | acyltransferase                                                        |  |  |  |  |
| MSMEG_1829 | S |         | 1.80 | 0.32  | F420-0--gamma-glutamyl ligase                                          |  |  |  |  |
| MSMEG_2788 | R | RV2670C | 1.80 | -0.09 | ATP/GTP-binding integral membrane protein                              |  |  |  |  |
| MSMEG_0100 | T | Rv0153c | 1.80 | 0.14  | phosphotyrosine protein phosphatase ptpb                               |  |  |  |  |
| hemL       | H | Rv0524  | 1.80 | -0.17 | glutamate-1-semialdehyde aminotransferase                              |  |  |  |  |
| MSMEG_1624 | T |         | 1.80 | 0.56  | universal stress protein family protein                                |  |  |  |  |
| MSMEG_5693 | G | RV0876C | 1.80 | 0.39  | transporter major facilitator family protein                           |  |  |  |  |
| MSMEG_5059 | G | Rv1237  | 1.79 | 0.00  | ABC transporter permease                                               |  |  |  |  |
| ruvC       | L | Rv2594c | 1.79 | 0.66  | Holliday junction resolvase                                            |  |  |  |  |
| MSMEG_6437 | P |         | 1.79 | -0.29 | copper resistance protein D                                            |  |  |  |  |
| MSMEG_5644 | S | RV0180C | 1.79 | 0.13  | membrane protein                                                       |  |  |  |  |
| MSMEG_0216 | R |         | 1.79 | 0.77  | 3-hydroxyacyl-CoA dehydrogenase                                        |  |  |  |  |
| MSMEG_0991 | G | Rv0536  | 1.79 | 0.65  | NAD-dependent epimerase/dehydratase                                    |  |  |  |  |
| MSMEG_1581 | Q |         | 1.78 | 0.19  | hypothetical protein                                                   |  |  |  |  |
| corA       | P | Rv1239c | 1.78 | -0.82 | magnesium and cobalt transporter CorA                                  |  |  |  |  |
| MSMEG_6398 | R | Rv1886c | 1.78 | 0.49  | antigen 85-A                                                           |  |  |  |  |
| MSMEG_6072 | P | Rv3578  | 1.78 | 0.65  | citrate transporter                                                    |  |  |  |  |
| MSMEG_1894 | R | RV3224  | 1.77 | 0.13  | short chain dehydrogenase                                              |  |  |  |  |
| MSMEG_4873 | I |         | 1.77 | -0.64 | enoyl-CoA hydratase/isomerase                                          |  |  |  |  |
| MSMEG_3007 | C |         | 1.76 | -0.12 | succinate-semialdehyde dehydrogenase                                   |  |  |  |  |
| MSMEG_1573 | G | RV3433C | 1.76 | 0.70  | carbohydrate kinase                                                    |  |  |  |  |
| MSMEG_0087 | G |         | 1.76 | -0.49 | glucitol operon repressor                                              |  |  |  |  |
| MSMEG_5589 | P | Rv0924c | 1.75 | 0.66  | manganese transporter MntH                                             |  |  |  |  |
| foIE       | H | Rv3609c | 1.75 | 0.27  | GTP cyclohydrolase I                                                   |  |  |  |  |
| MSMEG_0627 | M |         | 1.74 | -0.69 | glycosyl transferase family protein                                    |  |  |  |  |
| MSMEG_6225 | G |         | 1.74 | -0.28 | proton antiporter efflux pump                                          |  |  |  |  |
| MSMEG_3127 | R | RV1466  | 1.74 | 0.90  | hypothetical protein                                                   |  |  |  |  |
| thiE       | H | Rv0414c | 1.74 | -0.02 | thiamine-phosphate pyrophosphorylase                                   |  |  |  |  |
| MSMEG_0435 | E | RV0263C | 1.74 | 0.90  | allophanate hydrolase subunit 2                                        |  |  |  |  |
| MSMEG_1374 | G |         | 1.74 | -0.63 | ribose ABC transporter periplasmic binding protein                     |  |  |  |  |
| malQ       | G | Rv1781c | 1.73 | -0.82 | 4-alpha-glucanotransferase                                             |  |  |  |  |
| MSMEG_2493 | E |         | 1.73 | -0.22 | aminotransferase, class I and II family protein                        |  |  |  |  |
| MSMEG_5075 | V | RV1218C | 1.73 | -0.16 | ABC transporter ATP-binding protein                                    |  |  |  |  |
| lgt        | M |         | 1.73 | -0.27 | prolipoprotein diacylglycerol transferase                              |  |  |  |  |

|            |   |         |      |       |                                                                         |  |  |  |
|------------|---|---------|------|-------|-------------------------------------------------------------------------|--|--|--|
| MSMEG_2157 | S |         | 1.73 | 0.87  | hypothetical protein                                                    |  |  |  |
| MSMEG_4279 | T | RV2212  | 1.72 | -0.34 | adenylate and guanylate cyclase catalytic domain-containing protein     |  |  |  |
| MSMEG_1940 | I | Rv3203  | 1.71 | 0.35  | alpha/beta hydrolase                                                    |  |  |  |
| MSMEG_4231 | M | Rv2157c | 1.71 | -0.09 | UDP-N-acetylmuramoyl-tripeptide--D-alanyl-D-alanine ligase              |  |  |  |
| MSMEG_5533 | C |         | 1.71 | -0.13 | 4Fe-4S ferredoxin                                                       |  |  |  |
| cbiQ       | P |         | 1.71 | 0.51  | cobalt ABC transporter permease                                         |  |  |  |
| MSMEG_4225 | M | Rv2151c | 1.71 | 0.17  | cell division protein FtsQ                                              |  |  |  |
| MSMEG_1762 | C | Rv3293  | 1.71 | -0.10 | piperidine-6-carboxylic acid dehydrogenase                              |  |  |  |
| MSMEG_3879 | R | RV2073C | 1.71 | -0.06 | short chain dehydrogenase                                               |  |  |  |
| rimI       | R | Rv3420c | 1.71 | 0.98  | ribosomal-protein-alanine acetyltransferase                             |  |  |  |
| MSMEG_0667 | I |         | 1.71 | -0.20 | butyryl-CoA dehydrogenase                                               |  |  |  |
| MSMEG_4908 | Q | RV1333  | 1.70 | 0.45  | endo-type 6-aminohexanoate oligomer hydrolase                           |  |  |  |
| cobD       | H | Rv2236c | 1.70 | -0.30 | cobalamin biosynthesis protein                                          |  |  |  |
| MSMEG_5547 | S |         | 1.70 | 0.01  | hypothetical protein                                                    |  |  |  |
| MSMEG_3616 | S | RV1861  | 1.70 | 0.39  | integral membrane protein                                               |  |  |  |
| MSMEG_3213 | V | RV3263  | 1.70 | -0.65 | hypothetical protein                                                    |  |  |  |
| MSMEG_6914 | G |         | 1.69 | 0.08  | hypothetical protein                                                    |  |  |  |
| MSMEG_2357 | E | Rv3025c | 1.69 | -0.60 | cysteine desulfurase                                                    |  |  |  |
| MSMEG_2942 | R |         | 1.69 | 0.87  | glyoxalase/bleomycin resistance protein/dioxygenase superfamily protein |  |  |  |
| MSMEG_1684 | R | RV3311  | 1.69 | -0.21 | hypothetical protein                                                    |  |  |  |
| MSMEG_2122 | G |         | 1.69 | 0.34  | dihydroxyacetone kinase subunit DhaL                                    |  |  |  |
| MSMEG_4912 | L | Rv1329c | 1.68 | -0.09 | helicase                                                                |  |  |  |
| MSMEG_5234 | R |         | 1.68 | -0.37 | short-chain dehydrogenase/reductase SDR                                 |  |  |  |
| psd        | I | Rv0437c | 1.68 | -0.14 | phosphatidylserine decarboxylase                                        |  |  |  |
| MSMEG_2940 | S | RV2603C | 1.68 | -0.04 | hypothetical protein                                                    |  |  |  |
| MSMEG_4719 | E |         | 1.68 | -0.74 | peptidase S9, prolyl oligopeptidase                                     |  |  |  |
| MSMEG_0321 | R |         | 1.68 | -0.72 | transcriptional regulator                                               |  |  |  |
| MSMEG_1432 | I |         | 1.68 | 0.27  | acetylcholinesterase                                                    |  |  |  |
| MSMEG_4233 | M | Rv2163c | 1.68 | 0.42  | penicillin binding protein transpeptidase domain-containing protein     |  |  |  |
| MSMEG_3534 | R |         | 1.68 | 0.69  | 4-hydroxybenzoyl-CoA thioesterase                                       |  |  |  |
| MSMEG_6408 | I | RV3814C | 1.67 | 0.18  | acyltransferase                                                         |  |  |  |
| MSMEG_5064 | G |         | 1.67 | 0.56  | methyl-CoA lyase                                                        |  |  |  |
| nuoD       | C | Rv3148  | 1.67 | 0.81  | NADH dehydrogenase subunit D                                            |  |  |  |
| MSMEG_3618 | I | Rv1860  | 1.67 | 0.48  | hypothetical protein                                                    |  |  |  |
| MSMEG_5851 | R | RV0774C | 1.66 | -1.10 | esterase                                                                |  |  |  |
| MSMEG_3239 | T |         | 1.66 | 0.15  | two-component system sensor kinase                                      |  |  |  |
| MSMEG_6320 | Q |         | 1.66 | 0.26  | diol dehydrase subunit gamma                                            |  |  |  |
| MSMEG_0592 | K |         | 1.66 | -0.01 | rhamnose catabolism operon transcriptional regulator                    |  |  |  |
| MSMEG_5883 | C |         | 1.66 | 0.00  | 2Fe-2S-binding domain-containing protein                                |  |  |  |
| murG       | M | Rv2153c | 1.66 | -0.09 | UDPdiphospho-muramoylpentapeptide beta-N- acetylglucosaminyltransferase |  |  |  |
| MSMEG_6128 | K |         | 1.66 | -0.79 | two-component system response regulator                                 |  |  |  |
| MSMEG_0634 | I | RV0308  | 1.66 | -0.84 | PAP2 superfamily protein                                                |  |  |  |
| bioB       | H | Rv1589  | 1.66 | 0.12  | biotin synthase                                                         |  |  |  |
| priA       | L | Rv1402  | 1.65 | -0.42 | primosome assembly protein PriA                                         |  |  |  |
| smc        | D | Rv2922c | 1.65 | 0.01  | chromosome segregation protein SMC                                      |  |  |  |
| MSMEG_1941 | L | RV3202C | 1.65 | 0.03  | helicase, UvrD/Rep family protein                                       |  |  |  |
| MSMEG_4304 | K |         | 1.64 | -0.31 | regulatory protein                                                      |  |  |  |
| MSMEG_2361 | S |         | 1.64 | 0.10  | phosphoribosylglycinamide formyltransferase                             |  |  |  |
| rffB       | M | Rv3266c | 1.64 | -0.44 | dTDP-4-dehydrorhamnose reductase                                        |  |  |  |

|            |   |         |      |       |                                                                      |  |  |  |
|------------|---|---------|------|-------|----------------------------------------------------------------------|--|--|--|
| MSMEG_2584 | M | RV2864C | 1.64 | 0.34  | penicillin-binding protein                                           |  |  |  |
| MSMEG_2804 | T |         | 1.63 | 0.17  | two-component system sensor kinase                                   |  |  |  |
| ggt        | E | Rv0773c | 1.63 | 0.17  | gamma-glutamyltranspeptidase                                         |  |  |  |
| MSMEG_5163 | E |         | 1.63 | -0.36 | glycine/betaine ABC transporter periplasmic protein                  |  |  |  |
| MSMEG_0863 | R | RV0439C | 1.63 | -0.06 | short chain dehydrogenase                                            |  |  |  |
| MSMEG_1899 | I | Rv2503c | 1.63 | 0.20  | succinyl-CoA:3-ketoacid-coenzyme A transferase subunit B             |  |  |  |
| MSMEG_3255 | S |         | 1.62 | 0.29  | DoxX subfamily protein                                               |  |  |  |
| MSMEG_4449 | K |         | 1.62 | 0.11  | transcriptional regulator                                            |  |  |  |
| MSMEG_0999 | S | RV0541C | 1.62 | 0.17  | integral membrane protein                                            |  |  |  |
| MSMEG_2422 | C | Rv2922A | 1.61 | 0.17  | acylphosphatase                                                      |  |  |  |
| MSMEG_3843 | R | RV1628C | 1.61 | -1.08 | hypothetical protein                                                 |  |  |  |
| MSMEG_0810 | F |         | 1.61 | 0.32  | pyrimidine permease RutG                                             |  |  |  |
| MSMEG_5193 | K |         | 1.61 | 0.30  | AraC family transcriptional regulator                                |  |  |  |
| MSMEG_5430 | R |         | 1.61 | 0.26  | retinol dehydrogenase 13                                             |  |  |  |
| MSMEG_4220 | R | RV2148C | 1.60 | -0.27 | hypothetical protein                                                 |  |  |  |
| cobM       | H | Rv2071c | 1.60 | -0.51 | precorrin-4 C(11)-methyltransferase                                  |  |  |  |
| MSMEG_0971 | C | RV0526  | 1.60 | 0.06  | hypothetical protein                                                 |  |  |  |
| MSMEG_1533 | O | Rv3449  | 1.60 | 0.02  | subtilase                                                            |  |  |  |
| MSMEG_1954 | R | RV3197  | 1.60 | -0.43 | ABC transporter                                                      |  |  |  |
| secD       | U | Rv2587c | 1.59 | 0.39  | preprotein translocase subunit SecD                                  |  |  |  |
| MSMEG_5640 | G |         | 1.59 | 0.67  | amylase                                                              |  |  |  |
| MSMEG_1902 | K |         | 1.59 | -0.20 | transcriptional regulator                                            |  |  |  |
| MSMEG_1199 | S | RV0585C | 1.59 | 0.67  | hypothetical protein                                                 |  |  |  |
| MSMEG_4256 | M | RV2190C | 1.59 | -0.16 | NLP/P60 family protein                                               |  |  |  |
| MSMEG_2787 | H | Rv2671  | 1.59 | -0.22 | hypothetical protein                                                 |  |  |  |
| gatA       | J | Rv3011c | 1.59 | 0.27  | glutamyl-tRNA(Gln)/aspartyl-tRNA(Asn) amidotransferase subunit alpha |  |  |  |
| MSMEG_0318 | Q |         | 1.58 | 0.45  | AMP-dependent synthetase/ligase                                      |  |  |  |
| MSMEG_3870 | Q |         | 1.58 | 0.20  | alpha-ketoglutarate-dependent taurine dioxygenase                    |  |  |  |
| MSMEG_1572 | E |         | 1.58 | 0.70  | GntR family transcriptional regulator                                |  |  |  |
| MSMEG_3902 | O |         | 1.58 | 0.86  | ATPase AAA                                                           |  |  |  |
| MSMEG_4486 | K | RV2358  | 1.57 | -0.42 | ArsR family transcriptional regulator                                |  |  |  |
| MSMEG_2490 | Q |         | 1.57 | 0.10  | decarboxylase                                                        |  |  |  |
| MSMEG_3571 | Q |         | 1.57 | 0.16  | thioesterase                                                         |  |  |  |
| MSMEG_3059 | I | Rv1400c | 1.57 | -0.54 | esterase                                                             |  |  |  |
| MSMEG_6318 | D |         | 1.56 | 0.00  | diol dehydratase reactivation protein                                |  |  |  |
| MSMEG_5235 | R |         | 1.56 | 0.24  | short chain dehydrogenase                                            |  |  |  |
| MSMEG_1891 | S | RV3226C | 1.56 | 0.86  | hypothetical protein                                                 |  |  |  |
| serB       | E | Rv3042c | 1.56 | -0.42 | phosphoserine phosphatase                                            |  |  |  |
| MSMEG_5681 | R | Rv0886  | 1.56 | 0.36  | ferredoxin/ferredoxin--NADP reductase                                |  |  |  |
| MSMEG_5153 | I | RV1157C | 1.56 | 0.32  | hypothetical protein                                                 |  |  |  |
| MSMEG_0066 | S | Rv3875  | 1.56 | -0.85 | early secretory antigenic target, 6 kDa                              |  |  |  |
| MSMEG_2642 | S |         | 1.55 | 0.37  | hypothetical protein                                                 |  |  |  |
| MSMEG_0580 | I |         | 1.55 | 0.55  | hypothetical protein                                                 |  |  |  |
| MSMEG_3193 | K |         | 1.55 | -0.08 | TetR family transcriptional regulator                                |  |  |  |
| MSMEG_3860 | M | Rv2051c | 1.55 | 0.12  | polyprenol-monophosphomannose synthase Ppm1                          |  |  |  |
| MSMEG_6191 | J | RV3678C | 1.55 | 0.74  | translation initiation inhibitor                                     |  |  |  |
| MSMEG_3622 | O | Rv1853  | 1.54 | 0.81  | hypothetical protein                                                 |  |  |  |
| MSMEG_2116 | G |         | 1.54 | -0.64 | PTS system, glucose-specific IIBC component                          |  |  |  |
| MSMEG_2159 | S |         | 1.54 | 0.77  | hypothetical protein                                                 |  |  |  |

|            |   |         |      |       |                                                                                  |  |  |  |  |
|------------|---|---------|------|-------|----------------------------------------------------------------------------------|--|--|--|--|
| MSMEG_6231 | H | RV1978  | 1.53 | -0.25 | hypothetical protein                                                             |  |  |  |  |
| MSMEG_5908 | Q | Rv3506  | 1.53 | 0.41  | acyl-CoA synthetase                                                              |  |  |  |  |
| otsB       | G |         | 1.53 | -0.28 | trehalose-phosphatase                                                            |  |  |  |  |
| MSMEG_6173 | E | RV3661  | 1.53 | 0.83  | morphological differentiation-associated protein                                 |  |  |  |  |
| MSMEG_3677 | L | Rv1746  | 1.53 | -0.05 | serine/threonine protein kinase                                                  |  |  |  |  |
| MSMEG_4896 | Q |         | 1.53 | -0.03 | fatty-acid--CoA ligase                                                           |  |  |  |  |
| MSMEG_5251 | P |         | 1.53 | 0.41  | hypothetical protein                                                             |  |  |  |  |
| MSMEG_6662 | R |         | 1.52 | 0.46  | short chain dehydrogenase                                                        |  |  |  |  |
| MSMEG_5413 | P | RV1026  | 1.52 | 0.30  | exopolyphosphatase                                                               |  |  |  |  |
| MSMEG_4925 | L |         | 1.52 | 0.19  | transcriptional regulator, Ada family protein/DNA-3-methyladenine glycosylase II |  |  |  |  |
| dacB       | M | RV3627C | 1.52 | 0.18  | D-alanyl-D-alanine carboxypeptidase/D-alanyl-D-alanine-endopeptidase             |  |  |  |  |
| MSMEG_4898 | K | RV1343C | 1.52 | 0.25  | hypothetical protein                                                             |  |  |  |  |
| trpB       | E | Rv1612  | 1.51 | -0.37 | tryptophan synthase subunit beta                                                 |  |  |  |  |
| MSMEG_0367 | J |         | 1.51 | 0.03  | O-demethylpuromycin-O-methyltransferase                                          |  |  |  |  |
| MSMEG_5073 | R | RV1220C | 1.51 | -0.55 | O-methyltransferase, family protein 3                                            |  |  |  |  |
| MSMEG_1692 | K |         | 1.51 | -0.69 | ECF-family protein RNA polymerase sigma factor                                   |  |  |  |  |
| alr        | M | Rv3423c | 1.51 | -0.20 | alanine racemase                                                                 |  |  |  |  |
| thiO       | E | Rv0415  | 1.51 | -0.08 | glycine oxidase ThiO                                                             |  |  |  |  |
| MSMEG_5970 | H |         | 1.51 | -0.26 | glutamate-1-semialdehyde 2,1-aminomutase                                         |  |  |  |  |
| dnaE       | L |         | 1.51 | 0.43  | DNA polymerase III subunit alpha                                                 |  |  |  |  |
| MSMEG_0809 | S | RV1139C | 1.50 | -0.72 | isoprenylcysteine carboxyl methyltransferase                                     |  |  |  |  |
| MSMEG_5884 | I |         | 1.50 | -0.09 | 3-hydroxyisobutyrate dehydrogenase                                               |  |  |  |  |
| MSMEG_0877 | M |         | 1.50 | -0.51 | dihydrodipicolinate synthase                                                     |  |  |  |  |
| MSMEG_3081 | S | Rv1423  | 1.50 | 0.35  | hypothetical protein                                                             |  |  |  |  |
| MSMEG_3172 | L |         | 1.50 | -0.08 | DNA polymerase IV                                                                |  |  |  |  |
| MSMEG_5220 | I |         | 1.50 | 0.39  | esterase/lipase/thioesterase                                                     |  |  |  |  |
| MSMEG_3581 | R |         | 1.50 | 0.34  | FabG protein                                                                     |  |  |  |  |
| MSMEG_6125 | K |         | 1.49 | -0.01 | transcriptional regulatory protein                                               |  |  |  |  |
| MSMEG_3781 | S | RV1645C | 1.49 | 0.46  | hypothetical protein                                                             |  |  |  |  |
| MSMEG_3842 | R |         | 1.49 | 0.46  | esterase                                                                         |  |  |  |  |
| MSMEG_5987 | K |         | 1.49 | 0.11  | two-component regulator                                                          |  |  |  |  |
| leuB       | E | Rv2995c | 1.49 | -0.37 | 3-isopropylmalate dehydrogenase                                                  |  |  |  |  |
| MSMEG_4662 | G |         | 1.49 | 0.39  | deoxyribose-phosphate aldolase superfamily protein                               |  |  |  |  |
| MSMEG_1536 | D |         | 1.49 | -0.29 | ftsK/SpolIIE family protein                                                      |  |  |  |  |
| MSMEG_5066 | S | RV1231C | 1.49 | 0.17  | integral membrane protein                                                        |  |  |  |  |
| MSMEG_5838 | K |         | 1.49 | 0.79  | TetR family transcriptional regulator                                            |  |  |  |  |
| MSMEG_1382 | R |         | 1.48 | -0.33 | Mmpl5 protein                                                                    |  |  |  |  |
| MSMEG_4653 | G |         | 1.48 | 0.44  | AP endonuclease, family protein 2 superfamily protein                            |  |  |  |  |
| MSMEG_2279 | R |         | 1.48 | -1.25 | 3-hydroxyacyl-CoA dehydrogenase                                                  |  |  |  |  |
| MSMEG_3783 | I | Rv2789c | 1.48 | 0.04  | acyl-CoA dehydrogenase                                                           |  |  |  |  |
| MSMEG_2875 | I |         | 1.48 | -0.13 | esterase                                                                         |  |  |  |  |
| MSMEG_4577 | S | RV2417C | 1.48 | 0.61  | DegV family protein                                                              |  |  |  |  |
| MSMEG_5006 | T | RV1276C | 1.48 | -0.36 | phosphohistidine phosphatase                                                     |  |  |  |  |
| MSMEG_6900 | M | Rv0050  | 1.48 | -0.08 | penicillin-binding protein 1                                                     |  |  |  |  |
| MSMEG_4975 | R |         | 1.48 | 0.01  | flavin-nucleotide-binding protein                                                |  |  |  |  |
| MSMEG_2762 | G | Rv2701c | 1.48 | -0.35 | inositol-1-monophosphatase                                                       |  |  |  |  |
| MSMEG_6866 | P |         | 1.48 | 0.18  | peptide ABC transporter permease                                                 |  |  |  |  |
| MSMEG_5994 | I | Rv3544c | 1.47 | 0.47  | acyl-CoA dehydrogenase                                                           |  |  |  |  |
| cobH       | H |         | 1.47 | 0.17  | precorrin-8X methylmutase                                                        |  |  |  |  |

|            |   |         |      |       |                                                             |  |  |  |  |
|------------|---|---------|------|-------|-------------------------------------------------------------|--|--|--|--|
| MSMEG_0316 | G |         | 1.47 | 0.28  | NagC regulator                                              |  |  |  |  |
| MSMEG_1210 | S |         | 1.47 | -0.38 | hypothetical protein                                        |  |  |  |  |
| MSMEG_0923 | S | RV0479C | 1.47 | -0.40 | hypothetical protein                                        |  |  |  |  |
| MSMEG_6519 | P |         | 1.47 | -0.09 | pyridoxamine 5'-phosphate oxidase                           |  |  |  |  |
| MSMEG_3608 | I | RV1867  | 1.47 | -0.38 | acetyl-CoA acetyltransferase                                |  |  |  |  |
| MSMEG_4968 | T |         | 1.47 | 0.59  | two-component system sensor kinase                          |  |  |  |  |
| MSMEG_6421 | K | RV3840  | 1.47 | -0.23 | transcriptional regulator                                   |  |  |  |  |
| MSMEG_1577 | R | RV3422C | 1.47 | 0.11  | hypothetical protein                                        |  |  |  |  |
| MSMEG_2793 | T |         | 1.46 | 0.63  | sensor-type histidine kinase PrrB                           |  |  |  |  |
| MSMEG_2665 | O | RV2772C | 1.46 | 0.23  | hypothetical protein                                        |  |  |  |  |
| MSMEG_1460 | R |         | 1.46 | 0.16  | pyridine nucleotide-disulfide oxidoreductase                |  |  |  |  |
| MSMEG_1096 | O |         | 1.46 | -0.31 | urease accessory protein UreD                               |  |  |  |  |
| MSMEG_5045 | C | RV0161  | 1.45 | -0.13 | D-2-hydroxyacid dehydrogenase                               |  |  |  |  |
| MSMEG_4962 | C | RV1751  | 1.45 | 0.71  | hypothetical protein                                        |  |  |  |  |
| rho        | K | Rv1297  | 1.45 | -1.27 | transcription termination factor Rho                        |  |  |  |  |
| MSMEG_3867 | R | RV3163C | 1.45 | -0.86 | ATPase AAA                                                  |  |  |  |  |
| MSMEG_1681 | J |         | 1.45 | -1.22 | endoribonuclease L-PSP superfamily protein                  |  |  |  |  |
| MSMEG_3303 | R |         | 1.45 | -0.25 | carboxylic ester hydrolase                                  |  |  |  |  |
| MSMEG_4517 | K |         | 1.45 | 0.13  | TetR family transcriptional regulator                       |  |  |  |  |
| MSMEG_3848 | I | Rv2045c | 1.45 | 0.11  | para-nitrobenzyl esterase                                   |  |  |  |  |
| ung        | L | Rv2976c | 1.45 | 0.02  | uracil-DNA glycosylase                                      |  |  |  |  |
| MSMEG_1371 | G |         | 1.44 | 0.12  | hypothetical protein                                        |  |  |  |  |
| MSMEG_4572 | L | RV2413C | 1.44 | -0.24 | hypothetical protein                                        |  |  |  |  |
| MSMEG_0691 | K | RV0339C | 1.44 | -0.11 | transcriptional regulatory protein                          |  |  |  |  |
| MSMEG_4971 | R | RV2781C | 1.44 | -0.17 | oxidoreductase                                              |  |  |  |  |
| argC       | E | Rv1652  | 1.44 | 0.63  | N-acetyl-gamma-glutamyl-phosphate reductase                 |  |  |  |  |
| ruvA       | L | Rv2593c | 1.43 | -0.20 | Holliday junction DNA helicase RuvA                         |  |  |  |  |
| MSMEG_2182 | K | RV0258C | 1.43 | -0.23 | transcriptional regulator                                   |  |  |  |  |
| ilvE       | H | Rv2210c | 1.43 | 0.05  | branched-chain amino acid aminotransferase                  |  |  |  |  |
| MSMEG_5848 | E |         | 1.42 | -0.03 | amino acid permease                                         |  |  |  |  |
| MSMEG_2470 | I |         | 1.42 | -0.39 | acyl-CoA thioesterase                                       |  |  |  |  |
| MSMEG_4463 | R | RV2314C | 1.42 | -1.25 | CalR5 protein                                               |  |  |  |  |
| MSMEG_3506 | E |         | 1.42 | 0.05  | amino acid decarboxylase                                    |  |  |  |  |
| MSMEG_3252 | S | RV2639C | 1.42 | 0.03  | hypothetical protein                                        |  |  |  |  |
| hisF       | E | Rv1605  | 1.42 | 0.18  | imidazole glycerol phosphate synthase subunit HisF          |  |  |  |  |
| MSMEG_1546 | Q |         | 1.42 | -0.33 | coenzyme B12-dependent glycerol dehydrogenase small subunit |  |  |  |  |
| MSMEG_3146 | M | RV1478  | 1.42 | 0.56  | invasin 1                                                   |  |  |  |  |
| MSMEG_3246 | T |         | 1.42 | 0.60  | response regulator                                          |  |  |  |  |
| MSMEG_0232 | G | RV0191  | 1.42 | -0.22 | sugar transporter family protein                            |  |  |  |  |
| MSMEG_0276 | C |         | 1.42 | 0.22  | aldehyde-alcohol dehydrogenase                              |  |  |  |  |
| MSMEG_3630 | K |         | 1.42 | 0.66  | CopY family transcriptional regulator protein               |  |  |  |  |
| MSMEG_2105 | L |         | 1.41 | 0.04  | ATP dependent DNA ligase                                    |  |  |  |  |
| MSMEG_6533 | I |         | 1.41 | 0.40  | hypothetical protein                                        |  |  |  |  |
| MSMEG_3480 | V |         | 1.41 | -0.18 | streptomycin 6-kinase                                       |  |  |  |  |
| MSMEG_6083 | L | Rv3589  | 1.41 | 0.86  | base excision DNA repair protein, HhH-GPD family protein    |  |  |  |  |
| rpe        | G | Rv1408  | 1.41 | -0.13 | ribulose-phosphate 3-epimerase                              |  |  |  |  |
| MSMEG_5619 | I |         | 1.41 | -0.12 | acyl-CoA dehydrogenase                                      |  |  |  |  |
| MSMEG_1700 | K |         | 1.41 | -0.33 | TetR family transcriptional regulator                       |  |  |  |  |
| MSMEG_6099 | S | RV3604C | 1.41 | -0.67 | hypothetical protein                                        |  |  |  |  |

|            |   |          |      |       |                                                              |  |  |  |
|------------|---|----------|------|-------|--------------------------------------------------------------|--|--|--|
| MSMEG_5858 | R | RV0769   | 1.41 | -0.08 | short chain dehydrogenase                                    |  |  |  |
| MSMEG_6220 | R | RV3693   | 1.41 | 0.01  | lipoprotein                                                  |  |  |  |
| MSMEG_1366 | Q | Rv0655   | 1.41 | 0.59  | ABC transporter ATP-binding protein                          |  |  |  |
| MSMEG_5237 | R | RV1101C  | 1.41 | -0.05 | hypothetical protein                                         |  |  |  |
| MSMEG_3145 | M | RV1477   | 1.40 | 0.21  | secreted cell wall-associated hydrolase                      |  |  |  |
| uppS       | I | RV1086   | 1.40 | -0.29 | UDP pyrophosphate synthase                                   |  |  |  |
| MSMEG_0865 | S | RV1226C  | 1.40 | -0.27 | membrane flanked domain-containing protein                   |  |  |  |
| MSMEG_1379 | R |          | 1.40 | 0.11  | hypothetical protein                                         |  |  |  |
| MSMEG_4894 | S |          | 1.40 | -0.72 | hypothetical protein                                         |  |  |  |
| MSMEG_5696 | K | Rv0871   | 1.40 | -0.24 | cold-shock DNA-binding domain-containing protein             |  |  |  |
| ptsI       | G |          | 1.40 | 0.12  | phosphoenolpyruvate-protein phosphotransferase               |  |  |  |
| MSMEG_3254 | S |          | 1.39 | 0.60  | RDD family protein                                           |  |  |  |
| MSMEG_4984 | Q | RV1532C  | 1.39 | -1.19 | hypothetical protein                                         |  |  |  |
| MSMEG_3644 | K | RV1830   | 1.39 | -0.66 | MerR family transcriptional regulator                        |  |  |  |
| MSMEG_2342 | C |          | 1.39 | -0.55 | glycosyltransferase                                          |  |  |  |
| MSMEG_5738 | O |          | 1.39 | -0.62 | hypothetical protein                                         |  |  |  |
| MSMEG_0662 | E |          | 1.39 | 0.95  | putrescine transport ATP-binding protein PotG                |  |  |  |
| aroE       | E | Rv2552c  | 1.39 | 0.39  | shikimate 5-dehydrogenase                                    |  |  |  |
| MSMEG_2806 | T |          | 1.38 | 0.49  | two-component system response regulator                      |  |  |  |
| MSMEG_4348 | H | Rv3509c  | 1.38 | -0.51 | hypothetical protein                                         |  |  |  |
| alaS       | J | Rv2555c  | 1.38 | -0.06 | alanyl-tRNA synthetase                                       |  |  |  |
| MSMEG_2878 | I |          | 1.38 | 0.27  | acyl-CoA dehydrogenase                                       |  |  |  |
| MSMEG_4334 | C | RV2250.1 | 1.38 | 0.32  | flavoprotein                                                 |  |  |  |
| MSMEG_6416 | G | RV3837C  | 1.38 | 0.26  | phosphoglycerate mutase                                      |  |  |  |
| MSMEG_6168 | U | RV3658C  | 1.38 | 0.78  | type II secretion system protein F                           |  |  |  |
| MSMEG_6044 | K | RV3575C  | 1.38 | 0.07  | ligand-binding /sugar binding domain-containing protein      |  |  |  |
| MSMEG_3884 | D | RV2091C  | 1.37 | 0.19  | hypothetical protein                                         |  |  |  |
| MSMEG_0973 | O | RV0528   | 1.37 | -0.75 | hypothetical protein                                         |  |  |  |
| MSMEG_0105 | K | Rv0844c  | 1.37 | -0.30 | LuxR family transcriptional regulator                        |  |  |  |
| MSMEG_6219 | R | Rv3692   | 1.37 | -0.11 | ATPase AAA                                                   |  |  |  |
| MSMEG_4626 | J | Rv2444c  | 1.37 | 0.25  | ribonuclease, Rne/Rng family protein                         |  |  |  |
| MSMEG_6473 | Q |          | 1.37 | 0.41  | tetracenomycin polyketide synthesis O-methyltransferase TcmP |  |  |  |
| MSMEG_4906 | H |          | 1.36 | 0.16  | ThiS family protein                                          |  |  |  |
| MSMEG_6327 | J | RV3752C  | 1.36 | -0.13 | cytidine and deoxycytidylate deaminase                       |  |  |  |
| MSMEG_0621 | S |          | 1.36 | 0.00  | low molecular weight protein antigen 7                       |  |  |  |
| atzF       | J |          | 1.36 | 0.24  | allophanate hydrolase                                        |  |  |  |
| MSMEG_1641 | S | RV3361C  | 1.36 | -0.53 | hypothetical protein                                         |  |  |  |
| MSMEG_5853 | Q |          | 1.36 | 0.11  | cytochrome P450                                              |  |  |  |
| MSMEG_5695 | O |          | 1.36 | -0.10 | glutathione S-transferase                                    |  |  |  |
| MSMEG_6483 | H |          | 1.36 | -0.09 | methyltransferase type 11                                    |  |  |  |
| MSMEG_0436 | E | RV0264C  | 1.36 | 0.13  | allophanate hydrolase subunit 1                              |  |  |  |
| MSMEG_3822 | K |          | 1.35 | 0.51  | GntR family transcriptional regulator                        |  |  |  |
| MSMEG_3289 | R |          | 1.35 | -0.07 | gp61 protein                                                 |  |  |  |
| MSMEG_3634 | F | RV1843C  | 1.35 | 0.35  | inosine 5-monophosphate dehydrogenase                        |  |  |  |
| MSMEG_4467 | G | Rv2317   | 1.35 | 0.58  | ABC transporter permease                                     |  |  |  |
| MSMEG_1640 | R | RV3362C  | 1.35 | -1.11 | ATP/GTP-binding protein                                      |  |  |  |
| MSMEG_5513 | L |          | 1.35 | -0.54 | serine/threonine protein kinase                              |  |  |  |
| MSMEG_0680 | M | Rv0322   | 1.35 | -0.28 | UDP-glucose 6-dehydrogenase                                  |  |  |  |
| MSMEG_3598 | G |          | 1.34 | 0.66  | periplasmic sugar-binding proteins                           |  |  |  |

|            |   |         |      |       |                                                          |  |  |  |  |
|------------|---|---------|------|-------|----------------------------------------------------------|--|--|--|--|
| rph        | J |         | 1.34 | -0.26 | ribonuclease PH                                          |  |  |  |  |
| MSMEG_3542 | S |         | 1.34 | 0.54  | hypothetical protein                                     |  |  |  |  |
| MSMEG_0930 | R | RV0484C | 1.34 | 0.40  | serine 3-dehydrogenase                                   |  |  |  |  |
| panC       | H | Rv3602c | 1.34 | 0.33  | pantoate--beta-alanine ligase                            |  |  |  |  |
| MSMEG_2581 | R | RV2867C | 1.34 | 0.21  | acetyltransferase                                        |  |  |  |  |
| MSMEG_6520 | F | Rv0382c | 1.33 | 0.36  | orotate phosphoribosyltransferase                        |  |  |  |  |
| MSMEG_0358 | F | RV0233  | 1.33 | 0.68  | ribonucleotide-diphosphate reductase subunit beta        |  |  |  |  |
| MSMEG_6864 | K |         | 1.33 | -0.74 | transcriptional regulator                                |  |  |  |  |
| MSMEG_1001 | R |         | 1.33 | 0.51  | acetyltransferase, gnat family protein                   |  |  |  |  |
| MSMEG_1660 | R | RV0021C | 1.33 | 0.32  | oxidoreductase, 2-nitropropane dioxygenase               |  |  |  |  |
| MSMEG_6584 | I |         | 1.33 | 0.01  | acyl-CoA dehydrogenase                                   |  |  |  |  |
| MSMEG_6041 | I | Rv3573c | 1.33 | 0.40  | acyl-CoA dehydrogenase                                   |  |  |  |  |
| MSMEG_1475 | C |         | 1.32 | -0.88 | hypothetical protein                                     |  |  |  |  |
| recX       | R | Rv2736c | 1.32 | -0.12 | recombination regulator RecX                             |  |  |  |  |
| MSMEG_2798 | O |         | 1.32 | -0.10 | hypothetical protein                                     |  |  |  |  |
| carA       | F | Rv1383  | 1.32 | -0.06 | carbamoyl phosphate synthase small subunit               |  |  |  |  |
| MSMEG_1901 | K |         | 1.32 | -0.55 | DNA-binding HTH domain-containing protein                |  |  |  |  |
| MSMEG_5678 | E |         | 1.32 | -0.15 | glyoxalase/bleomycin resistance protein/dioxygenase      |  |  |  |  |
| MSMEG_6095 | E |         | 1.32 | 0.37  | D-amino acid deaminase                                   |  |  |  |  |
| MSMEG_3515 | R | Rv2002  | 1.32 | 0.08  | 3-alpha-(or 20-beta)-hydroxysteroid dehydrogenase        |  |  |  |  |
| MSMEG_6105 | O | Rv3610c | 1.31 | 0.90  | cell division protein                                    |  |  |  |  |
| greA       | K | Rv1080c | 1.31 | -0.09 | transcription elongation factor GreA                     |  |  |  |  |
| MSMEG_1638 | R | RV3364C | 1.31 | -0.77 | roadblock/LC7 domain-contain protein                     |  |  |  |  |
| MSMEG_3463 | Q | Rv3298c | 1.31 | -0.44 | esterase                                                 |  |  |  |  |
| MSMEG_3465 | Q | Rv1925  | 1.31 | 0.21  | fatty acid--CoA ligase                                   |  |  |  |  |
| MSMEG_4382 | R |         | 1.31 | 0.29  | dehydrogenase/reductase SDR family protein member 10     |  |  |  |  |
| MSMEG_6294 | C |         | 1.31 | 0.64  | caib/baif family protein                                 |  |  |  |  |
| MSMEG_0028 | L | Rv0014c | 1.31 | 0.02  | serine-threonine protein kinase                          |  |  |  |  |
| MSMEG_2188 | R |         | 1.30 | -0.27 | integral membrane protein                                |  |  |  |  |
| lysA       | E | Rv1293  | 1.30 | -0.24 | diaminopimelate decarboxylase                            |  |  |  |  |
| MSMEG_4717 | I | Rv2502c | 1.30 | 0.30  | carboxyl transferase domain-containing protein           |  |  |  |  |
| MSMEG_5988 | I |         | 1.30 | -0.31 | hypothetical protein                                     |  |  |  |  |
| mtrA       | K | Rv3246c | 1.30 | 0.05  | DNA-binding response regulator MtrA                      |  |  |  |  |
| MSMEG_4208 | S |         | 1.30 | -0.27 | integral membrane protein                                |  |  |  |  |
| MSMEG_0224 | R | RV0187  | 1.30 | -0.11 | O-methyltransferase MdmC                                 |  |  |  |  |
| MSMEG_6290 | Q |         | 1.30 | 0.11  | DNA-binding protein                                      |  |  |  |  |
| edd        | G |         | 1.30 | 0.10  | phosphogluconate dehydratase                             |  |  |  |  |
| coaD       | H |         | 1.29 | -0.68 | phosphopantetheine adenylyltransferase                   |  |  |  |  |
| MSMEG_0332 | R |         | 1.29 | 0.06  | 2-nitropropane dioxygenase                               |  |  |  |  |
| MSMEG_0361 | G | Rv0237  | 1.29 | -0.49 | glycosyl hydrolase                                       |  |  |  |  |
| hypE       | O |         | 1.29 | 0.03  | hydrogenase expression/formation protein HypE            |  |  |  |  |
| MSMEG_3079 | R | RV1421  | 1.29 | -0.32 | hypothetical protein                                     |  |  |  |  |
| MSMEG_0101 | S | RV1890C | 1.28 | -0.25 | hypothetical protein                                     |  |  |  |  |
| MSMEG_1046 | P | RV3041C | 1.28 | 0.05  | molybdenum ABC transporter ATPase                        |  |  |  |  |
| MSMEG_1643 | S |         | 1.28 | -0.20 | hypothetical protein                                     |  |  |  |  |
| MSMEG_6160 | R | RV3649  | 1.28 | 0.11  | ATP-dependent rna helicase, dead/deah box family protein |  |  |  |  |
| MSMEG_2121 | G |         | 1.28 | -0.20 | multiphosphoryl transfer protein (MTP)                   |  |  |  |  |
| MSMEG_6077 | K | RV3583C | 1.28 | 0.16  | CarD family transcriptional regulator                    |  |  |  |  |
| fbiC       | R |         | 1.28 | -0.03 | FO synthase                                              |  |  |  |  |

|            |   |         |      |       |                                                                           |  |  |  |  |
|------------|---|---------|------|-------|---------------------------------------------------------------------------|--|--|--|--|
| MSMEG_0311 | M | RV0225  | 1.27 | -0.73 | glycosyltransferase                                                       |  |  |  |  |
| MSMEG_5591 | R | RV0923C | 1.27 | 0.47  | hypothetical protein                                                      |  |  |  |  |
| mdcB       | H |         | 1.27 | 0.24  | triphosphoribosyl-dephospho-CoA synthase                                  |  |  |  |  |
| MSMEG_5674 | G |         | 1.27 | 0.64  | membrane transporter                                                      |  |  |  |  |
| MSMEG_1049 | H | RV3038C | 1.27 | 0.08  | UbiE/COQ5 family methyltransferase                                        |  |  |  |  |
| pyrD       | F | Rv2139  | 1.26 | -0.47 | dihydroorotate dehydrogenase 2                                            |  |  |  |  |
| bioA       | H | Rv1568  | 1.26 | 0.30  | adenosylmethionine-8-amino-7-oxononanoate aminotransferase                |  |  |  |  |
| nth        | L | Rv3674c | 1.26 | -0.60 | endonuclease III                                                          |  |  |  |  |
| MSMEG_5404 | I |         | 1.26 | 0.34  | propionate--CoA ligase                                                    |  |  |  |  |
| MSMEG_4545 | E | Rv3666c | 1.26 | 0.30  | extracellular solute-binding protein                                      |  |  |  |  |
| lysS       | J |         | 1.26 | -1.06 | lysyl-tRNA synthetase                                                     |  |  |  |  |
| MSMEG_2111 | E | RV1885C | 1.26 | -0.79 | chorismate mutase                                                         |  |  |  |  |
| MSMEG_6554 | V | RV1348  | 1.26 | -0.57 | ABC transporter ATP-binding protein                                       |  |  |  |  |
| MSMEG_5025 | K |         | 1.26 | -0.60 | transcriptional regulator                                                 |  |  |  |  |
| MSMEG_6069 | R | RV0106  | 1.26 | 0.41  | CobW/P47K domain-containing protein                                       |  |  |  |  |
| MSMEG_5910 | S |         | 1.26 | 0.02  | quinone binding protein                                                   |  |  |  |  |
| etfA       | C |         | 1.26 | 0.57  | electron transfer flavoprotein subunit alpha                              |  |  |  |  |
| MSMEG_3471 | H |         | 1.26 | 0.33  | hypothetical protein                                                      |  |  |  |  |
| moaC       | H | Rv0864  | 1.26 | -0.23 | molybdenum cofactor biosynthesis protein MoaC                             |  |  |  |  |
| MSMEG_4328 | Q | Rv2246  | 1.25 | -0.26 | 3-oxoacyl-ACP synthase                                                    |  |  |  |  |
| MSMEG_6190 | R | RV3677C | 1.25 | 0.10  | metallo-beta-lactamase                                                    |  |  |  |  |
| MSMEG_5258 | R |         | 1.25 | -0.16 | steroid delta-isomerase                                                   |  |  |  |  |
| MSMEG_0997 | R |         | 1.25 | -0.02 | hypothetical protein                                                      |  |  |  |  |
| MSMEG_2181 | D | Rv3641c | 1.25 | -0.03 | cell filamentation protein                                                |  |  |  |  |
| MSMEG_4174 | K |         | 1.25 | 0.78  | IclR family transcriptional regulator                                     |  |  |  |  |
| MSMEG_6091 | O |         | 1.25 | 0.69  | negative regulator of genetic competence ClpC/mecB                        |  |  |  |  |
| ftsZ       | D | Rv2150c | 1.25 | 0.05  | cell division protein FtsZ                                                |  |  |  |  |
| MSMEG_4644 | H | Rv2453c | 1.24 | 0.01  | molybdopterin-guanine dinucleotide biosynthesis protein A                 |  |  |  |  |
| MSMEG_1540 | J |         | 1.24 | -0.07 | ATP-dependent RNA helicase                                                |  |  |  |  |
| MSMEG_5466 | R |         | 1.24 | -0.26 | oxidoreductase                                                            |  |  |  |  |
| MSMEG_1563 | R |         | 1.24 | -0.36 | short-chain dehydrogenase/reductase SDR                                   |  |  |  |  |
| MSMEG_3693 | Q |         | 1.24 | -0.51 | cytochrome P450 monooxygenase                                             |  |  |  |  |
| cobA       | H | Rv2847c | 1.24 | 0.02  | uroporphyrin-III C-methyltransferase                                      |  |  |  |  |
| MSMEG_0067 | D |         | 1.24 | -0.05 | hypothetical protein                                                      |  |  |  |  |
| MSMEG_5004 | L | RV1277  | 1.24 | 0.10  | DNA repair exonuclease                                                    |  |  |  |  |
| rimM       | J | Rv2907c | 1.24 | -0.07 | 16S rRNA-processing protein RimM                                          |  |  |  |  |
| MSMEG_6688 | Q |         | 1.24 | -0.14 | regulatory protein                                                        |  |  |  |  |
| ureB       | E | Rv1849  | 1.24 | -0.49 | urease subunit beta                                                       |  |  |  |  |
| MSMEG_3477 | M | RV1566C | 1.24 | -0.20 | inv protein                                                               |  |  |  |  |
| MSMEG_3108 | G |         | 1.24 | 0.05  | ABC transporter ATPase                                                    |  |  |  |  |
| MSMEG_3873 | H |         | 1.24 | -0.09 | cobalamin biosynthesis protein cobJ                                       |  |  |  |  |
| MSMEG_2648 | Q | RV2794C | 1.24 | 0.21  | Sfp-type phosphopantetheinyl transferase                                  |  |  |  |  |
| MSMEG_3027 | R | RV2553C | 1.24 | 0.01  | hypothetical protein                                                      |  |  |  |  |
| MSMEG_3057 | P |         | 1.23 | -0.06 | metal ABC transporter permease                                            |  |  |  |  |
| MSMEG_0871 | C |         | 1.23 | 0.14  | aldehyde or xanthine dehydrogenase, molybdopterin binding subunit protein |  |  |  |  |
| engA       | R | Rv1713  | 1.23 | -0.59 | GTP-binding protein EngA                                                  |  |  |  |  |
| murQ       | R |         | 1.23 | -0.34 | N-acetylmuramic acid 6-phosphate etherase                                 |  |  |  |  |
| dxs        | I |         | 1.23 | 0.13  | 1-deoxy-D-xylulose-5-phosphate synthase                                   |  |  |  |  |
| MSMEG_6133 | M |         | 1.22 | 0.16  | 5-dehydro-4-deoxyglucarate dehydratase                                    |  |  |  |  |



|            |   |         |      |       |                                                                     |  |  |  |  |
|------------|---|---------|------|-------|---------------------------------------------------------------------|--|--|--|--|
| MSMEG_5684 | E | Rv0884c | 1.22 | -0.30 | phosphoserine aminotransferase                                      |  |  |  |  |
| MSMEG_5863 | Q | Rv0764c | 1.22 | 0.26  | cytochrome P450                                                     |  |  |  |  |
| MSMEG_2699 | C | RV2739C | 1.21 | 0.09  | hypothetical protein                                                |  |  |  |  |
| MSMEG_6195 | P | RV3680  | 1.21 | -1.09 | ion-transporting ATPase                                             |  |  |  |  |
| MSMEG_3780 | T | RV1647  | 1.21 | 0.21  | adenylate and guanylate cyclase catalytic domain-containing protein |  |  |  |  |
| recO       | L | Rv2362c | 1.21 | 0.29  | DNA repair protein RecO                                             |  |  |  |  |
| MSMEG_5204 | R |         | 1.21 | 0.58  | oxidoreductase, short chain dehydrogenase/reductase                 |  |  |  |  |
| MSMEG_2453 | K |         | 1.21 | -0.06 | GntR family transcriptional regulator                               |  |  |  |  |
| MSMEG_1070 | R |         | 1.21 | -0.33 | 3-oxoacyl-ACP reductase                                             |  |  |  |  |
| purN       | F | Rv0956  | 1.21 | 0.21  | phosphoribosylglycinamide formyltransferase                         |  |  |  |  |
| ftsW       | D | RV2154C | 1.21 | 0.20  | cell division protein FtsW                                          |  |  |  |  |
| mraY       | M |         | 1.21 | 0.27  | phospho-N-acetylmuramoyl-pentapeptide-transferase                   |  |  |  |  |
| MSMEG_5491 | I | Rv0975c | 1.21 | 0.59  | acyl-CoA dehydrogenase                                              |  |  |  |  |
| MSMEG_5761 | S |         | 1.21 | 0.02  | cupin                                                               |  |  |  |  |
| MSMEG_3532 | E |         | 1.21 | -0.27 | serine/threonine dehydratase                                        |  |  |  |  |
| MSMEG_0935 | G |         | 1.21 | -0.05 | 2,3-bisphosphoglycerate-independent phosphoglycerate mutase         |  |  |  |  |
| ksgA       | J |         | 1.21 | 0.33  | dimethyladenosine transferase                                       |  |  |  |  |
| MSMEG_5183 | R | RV1144  | 1.21 | 0.83  | 3-hydroxyacyl-CoA dehydrogenase                                     |  |  |  |  |
| moaE       | H | Rv0866  | 1.21 | -0.55 | molybdopterin converting factor subunit 2                           |  |  |  |  |
| MSMEG_4308 | R | RV2232  | 1.20 | -0.47 | 5'-nucleotidase                                                     |  |  |  |  |
| MSMEG_2433 | M |         | 1.20 | 0.35  | D-alanyl-D-alanine carboxypeptidase                                 |  |  |  |  |
| MSMEG_3647 | T | RV1827  | 1.20 | 0.14  | forkhead-associated protein                                         |  |  |  |  |
| MSMEG_4284 | R | RV2216  | 1.20 | 0.83  | hypothetical protein                                                |  |  |  |  |
| MSMEG_2511 | P | RV2895C | 1.20 | 0.44  | siderophore utilization protein                                     |  |  |  |  |
| MSMEG_4221 | S | RV2149C | 1.20 | -0.08 | hypothetical protein                                                |  |  |  |  |
| MSMEG_5857 | I | RV0770  | 1.20 | -0.28 | oxidoreductase                                                      |  |  |  |  |
| MSMEG_0089 | R |         | 1.20 | 0.51  | chromosome condensation protein                                     |  |  |  |  |
| MSMEG_4462 | R |         | 1.20 | -0.18 | sodium:solute symporter                                             |  |  |  |  |
| MSMEG_5554 | T |         | 1.20 | 0.28  | ANTAR domain-containing protein                                     |  |  |  |  |
| MSMEG_0812 | E |         | 1.19 | 0.29  | amino acid transporter                                              |  |  |  |  |
| MSMEG_0319 | I | RV0228  | 1.19 | -0.25 | acyltransferase                                                     |  |  |  |  |
| MSMEG_2507 | K |         | 1.19 | -0.36 | IcIR-family protein transcriptional regulator                       |  |  |  |  |
| mdcH       | I |         | 1.19 | -0.12 | malonate decarboxylase subunit epsilon                              |  |  |  |  |
| MSMEG_4641 | C |         | 1.19 | -0.15 | salicylate hydroxylase                                              |  |  |  |  |
| ispF       | I | Rv3581c | 1.18 | 0.76  | 2-C-methyl-D-erythritol 2,4-cyclodiphosphate synthase               |  |  |  |  |
| MSMEG_0098 | H | RV0839  | 1.18 | 0.14  | methyltransferase                                                   |  |  |  |  |
| glpK       | C | Rv3696c | 1.18 | 0.06  | glycerol kinase                                                     |  |  |  |  |
| MSMEG_2726 | E |         | 1.18 | -0.26 | glutamate permease                                                  |  |  |  |  |
| MSMEG_6430 | C |         | 1.18 | -0.53 | hypothetical protein                                                |  |  |  |  |
| MSMEG_4702 | S | RV0102  | 1.18 | 0.18  | ABC transporter permease                                            |  |  |  |  |
| MSMEG_4976 | Q |         | 1.18 | -0.35 | isochorismatase hydrolase                                           |  |  |  |  |
| MSMEG_3083 | R |         | 1.17 | -0.12 | nucleoside-diphosphate sugar epimerase                              |  |  |  |  |
| MSMEG_3895 | O | Rv2110c | 1.17 | 0.58  | proteasome subunit beta                                             |  |  |  |  |
| MSMEG_2359 | E | RV3015C | 1.17 | 0.26  | methionine synthase, vitamin-B12 independent                        |  |  |  |  |
| MSMEG_0207 | K |         | 1.17 | -0.70 | MarR family transcriptional regulator                               |  |  |  |  |
| MSMEG_1905 | I |         | 1.17 | -0.04 | acyl-CoA dehydrogenase                                              |  |  |  |  |
| MSMEG_6087 | V | Rv3593  | 1.17 | -0.32 | beta-lactamase                                                      |  |  |  |  |
| MSMEG_6175 | G |         | 1.17 | 0.05  | 2-keto-3-deoxy-galactonokinase                                      |  |  |  |  |
| sodC       | P | Rv0432  | 1.17 | 0.48  | copper/zinc superoxide dismutase                                    |  |  |  |  |

|            |   |         |      |       |                                                                                  |  |  |  |
|------------|---|---------|------|-------|----------------------------------------------------------------------------------|--|--|--|
| MSMEG_2117 | G |         | 1.17 | 0.11  | beta-glucoside-specific EII permease                                             |  |  |  |
| xseB       | L | Rv1107c | 1.17 | 0.03  | exodeoxyribonuclease VII small subunit                                           |  |  |  |
| MSMEG_1661 | M | Rv3330  | 1.17 | -0.34 | D-alanyl-D-alanine carboxypeptidase                                              |  |  |  |
| MSMEG_3484 | S |         | 1.17 | -0.35 | cupin                                                                            |  |  |  |
| MSMEG_5339 | E |         | 1.16 | -0.26 | nitrile hydratase regulator1                                                     |  |  |  |
| MSMEG_2087 | M | RV3104C | 1.16 | 0.61  | transporter small conductance mechanosensitive ion channel (MscS) family protein |  |  |  |
| MSMEG_4464 | R | RV2315C | 1.16 | 0.29  | modulator of DNA gyrase                                                          |  |  |  |
| MSMEG_4022 | K |         | 1.16 | -0.10 | TetR family transcriptional regulator                                            |  |  |  |
| MSMEG_0901 | S | RV0459  | 1.15 | 0.86  | hypothetical protein                                                             |  |  |  |
| murE       | M |         | 1.15 | -0.48 | UDP-N-acetylmuramoylalanyl-D-glutamate--2,6-diaminopimelate ligase               |  |  |  |
| MSMEG_5287 | R |         | 1.15 | 0.34  | dehydrogenase                                                                    |  |  |  |
| MSMEG_4977 | P |         | 1.15 | 0.01  | 3'(2'),5'-bisphosphate nucleotidase                                              |  |  |  |
| dnaG       | L | Rv2343c | 1.15 | -0.81 | DNA primase                                                                      |  |  |  |
| MSMEG_4394 | K |         | 1.14 | -0.64 | LysR family transcriptional regulator                                            |  |  |  |
| MSMEG_2769 | P |         | 1.14 | -0.34 | TrkB protein                                                                     |  |  |  |
| MSMEG_4301 | Q |         | 1.14 | 0.04  | fatty-acid--CoA ligase                                                           |  |  |  |
| MSMEG_0092 | K | RV0144  | 1.14 | -0.21 | transcriptional regulatory protein                                               |  |  |  |
| cobB       | H | Rv2848c | 1.14 | 0.06  | cobyrinic acid a,c-diamide synthase                                              |  |  |  |
| MSMEG_6592 | R |         | 1.14 | -0.55 | short-chain dehydrogenase/reductase SDR                                          |  |  |  |
| MSMEG_6203 | E | RV3684  | 1.14 | -0.64 | cysteine synthase/cystathionine beta-synthase                                    |  |  |  |
| MSMEG_0503 | G |         | 1.14 | 0.24  | DeoR family transcriptional regulator                                            |  |  |  |
| MSMEG_6903 | K | RV0047C | 1.14 | 0.20  | PadR family transcriptional regulator                                            |  |  |  |
| uvrB       | L | Rv1633  | 1.14 | 0.81  | excinuclease ABC subunit B                                                       |  |  |  |
| MSMEG_5375 | K |         | 1.13 | 0.05  | GntR family transcriptional regulator                                            |  |  |  |
| MSMEG_2936 | S | RV2609C | 1.13 | -0.31 | hydrolase, nudix family protein                                                  |  |  |  |
| MSMEG_0283 | R |         | 1.13 | -1.04 | short chain dehydrogenase                                                        |  |  |  |
| MSMEG_6126 | R |         | 1.13 | -0.22 | D-isomer specific 2-hydroxyacid dehydrogenase                                    |  |  |  |
| MSMEG_6796 | R |         | 1.13 | 0.16  | hypothetical protein                                                             |  |  |  |
| ispG       | I |         | 1.13 | -0.24 | 4-hydroxy-3-methylbut-2-en-1-yl diphosphate synthase                             |  |  |  |
| MSMEG_3790 | J | Rv1644  | 1.13 | 0.57  | TrmH family RNA methyltransferase                                                |  |  |  |
| MSMEG_1906 | C |         | 1.13 | -0.25 | toluate 1,2-dioxygenase electron transfer component                              |  |  |  |
| MSMEG_4307 | S | RV2230C | 1.13 | -0.09 | hypothetical protein                                                             |  |  |  |
| MSMEG_2680 | E |         | 1.13 | 0.09  | amino acid transporter                                                           |  |  |  |
| MSMEG_4964 | K |         | 1.13 | 0.62  | TetR family transcriptional regulator                                            |  |  |  |
| MSMEG_2355 | R | RV3027C | 1.12 | 0.21  | hypothetical protein                                                             |  |  |  |
| MSMEG_4339 | K |         | 1.12 | -0.26 | hypothetical protein                                                             |  |  |  |
| MSMEG_0972 | O | Rv0527  | 1.12 | -0.42 | cytochrome C biogenesis protein transmembrane region                             |  |  |  |
| MSMEG_4583 | R | RV2426C | 1.12 | -0.49 | ATPase AAA                                                                       |  |  |  |
| MSMEG_1574 | E | Rv3432c | 1.12 | 0.11  | glutamate decarboxylase                                                          |  |  |  |
| MSMEG_5383 | R |         | 1.12 | 0.29  | dehydrogenase/reductase SDR family protein member 4                              |  |  |  |
| MSMEG_1497 | I | Rv0752c | 1.12 | 0.76  | acyl-CoA dehydrogenase                                                           |  |  |  |
| MSMEG_2739 | M | RV2721C | 1.12 | -0.43 | hypothetical protein                                                             |  |  |  |
| MSMEG_4205 | K |         | 1.11 | -0.90 | transcriptional regulator                                                        |  |  |  |
| MSMEG_0470 | I |         | 1.11 | -0.75 | para-nitrobenzyl esterase                                                        |  |  |  |
| MSMEG_4632 | S | RV2449C | 1.11 | 0.46  | saccharopine dehydrogenase                                                       |  |  |  |
| MSMEG_6409 | I | RV3816C | 1.11 | 0.33  | acyltransferase                                                                  |  |  |  |
| MSMEG_0234 | O | RV0198C | 1.11 | -0.30 | metallopeptidase                                                                 |  |  |  |
| MSMEG_1340 | I | RV0635  | 1.11 | 0.47  | (3R)-hydroxyacyl-ACP dehydratase subunit HadA                                    |  |  |  |
| MSMEG_3187 | I | RV1565C | 1.11 | 0.35  | acyltransferase domain-containing protein                                        |  |  |  |

|            |   |         |      |       |                                                    |  |  |  |  |
|------------|---|---------|------|-------|----------------------------------------------------|--|--|--|--|
| MSMEG_2249 | C |         | 1.11 | -0.42 | hypothetical protein                               |  |  |  |  |
| aroC       | E |         | 1.11 | -0.33 | chorismate synthase                                |  |  |  |  |
| thiS       | H | Rv0416  | 1.11 | -0.10 | sulfur carrier protein ThiS                        |  |  |  |  |
| MSMEG_3817 | S | RV1632C | 1.11 | -0.42 | hypothetical protein                               |  |  |  |  |
| MSMEG_6238 | T |         | 1.10 | -0.22 | two-component system sensor kinase                 |  |  |  |  |
| cobN       | H | Rv2062c | 1.10 | 0.02  | cobaltochelataase subunit CobN                     |  |  |  |  |
| MSMEG_0320 | R | RV0230C | 1.10 | -0.22 | phosphotriesterase                                 |  |  |  |  |
| MSMEG_3026 | L | RV2554C | 1.10 | 0.14  | Holliday junction resolvase-like protein           |  |  |  |  |
| MSMEG_3266 | G |         | 1.10 | 0.31  | maltose/maltodextrin-binding protein               |  |  |  |  |
| MSMEG_0032 | D | Rv2154c | 1.10 | -0.21 | cell cycle protein, FtsW/RodA/SpoVE family protein |  |  |  |  |
| MSMEG_0527 | R |         | 1.10 | -0.33 | 2-hydroxycyclohexanecarboxyl-CoA dehydrogenase     |  |  |  |  |
| MSMEG_4366 | L |         | 1.10 | -0.18 | serine/threonine protein kinase                    |  |  |  |  |
| MSMEG_5641 | M |         | 1.10 | 0.28  | glycoside hydrolase family protein                 |  |  |  |  |
| MSMEG_3244 | S |         | 1.10 | 0.15  | hypothetical protein                               |  |  |  |  |
| MSMEG_4250 | P | RV2184C | 1.10 | 0.31  | membrane transport ATPase                          |  |  |  |  |
| obgE       | R |         | 1.09 | -0.08 | GTPase ObgE                                        |  |  |  |  |
| MSMEG_0141 | S | RV0176  | 1.09 | -0.10 | mce associated transmembrane protein               |  |  |  |  |
| MSMEG_3170 | S |         | 1.09 | -0.30 | hypothetical protein                               |  |  |  |  |
| guaA       | F |         | 1.09 | 0.32  | GMP synthase                                       |  |  |  |  |
| MSMEG_0200 | C |         | 1.09 | -0.59 | hypothetical protein                               |  |  |  |  |
| pyrC       | F |         | 1.09 | -0.19 | dihydroorotase                                     |  |  |  |  |
| MSMEG_5259 | O | RV1084  | 1.09 | 0.26  | hypothetical protein                               |  |  |  |  |
| MSMEG_5850 | S | RV0775  | 1.09 | -0.69 | TetR family transcriptional regulator              |  |  |  |  |
| MSMEG_5862 | R | RV0765C | 1.09 | 0.22  | short chain dehydrogenase                          |  |  |  |  |
| MSMEG_6098 | S | RV3603C | 1.09 | -0.19 | chalcone/stilbene synthase                         |  |  |  |  |
| cobG       | P | Rv2064  | 1.09 | 0.07  | precorrin-3B synthase                              |  |  |  |  |
| MSMEG_1939 | L | RV3204  | 1.09 | 0.71  | 6-O-methylguanine DNA methyltransferase            |  |  |  |  |
| trmB       | R |         | 1.09 | -0.05 | tRNA (guanine-N(7)-)-methyltransferase             |  |  |  |  |
| MSMEG_0932 | G | RV0485  | 1.09 | -0.36 | ROK family protein                                 |  |  |  |  |
| MSMEG_2130 | I |         | 1.09 | -0.17 | acyl-CoA dehydrogenase                             |  |  |  |  |
| MSMEG_5830 | S | Rv0798c | 1.09 | -0.47 | hypothetical protein                               |  |  |  |  |
| MSMEG_0127 | C | Rv0162c | 1.09 | 0.33  | oxidoreductase, zinc-binding dehydrogenase         |  |  |  |  |
| MSMEG_5639 | I | Rv0905  | 1.09 | 0.70  | enoyl-CoA hydratase                                |  |  |  |  |
| MSMEG_3235 | T |         | 1.09 | 0.64  | amino acid ABC transporter                         |  |  |  |  |
| MSMEG_5451 | L | RV1000C | 1.09 | -0.38 | alkylated DNA repair protein                       |  |  |  |  |
| MSMEG_6682 | K |         | 1.09 | -0.11 | RNA polymerase sigma-70 factor                     |  |  |  |  |
| MSMEG_1943 | L | RV3201C | 1.09 | 0.06  | ATP-dependent DNA helicase                         |  |  |  |  |
| MSMEG_5885 | R | RV3485C | 1.09 | 0.11  | short chain dehydrogenase                          |  |  |  |  |
| MSMEG_2431 | Q | RV2915C | 1.09 | -0.81 | amidohydrolase                                     |  |  |  |  |
| MSMEG_0737 | R | RV1544  | 1.08 | -0.27 | dehydrogenase                                      |  |  |  |  |
| folB       | H | Rv3607c | 1.08 | 0.23  | dihydroneopterin aldolase                          |  |  |  |  |
| MSMEG_3240 | K |         | 1.08 | -0.10 | LuxR family transcriptional regulator              |  |  |  |  |
| MSMEG_3058 | P |         | 1.08 | -0.08 | lipoprotein, nlpA family protein                   |  |  |  |  |
| MSMEG_1698 | R |         | 1.08 | 0.18  | ammonia monooxygenase                              |  |  |  |  |
| MSMEG_5762 | R |         | 1.08 | 0.57  | zinc-binding oxidoreductase                        |  |  |  |  |
| MSMEG_3528 | S | RV0116C | 1.08 | 0.29  | ErfK/YbiS/Ycfs/YnhG family protein                 |  |  |  |  |
| MSMEG_1114 | R |         | 1.08 | 0.51  | short chain dehydrogenase                          |  |  |  |  |
| MSMEG_2767 | R | RV2695  | 1.08 | -0.13 | hypothetical protein                               |  |  |  |  |
| MSMEG_1062 | Q | Rv0542c | 1.08 | 0.36  | O-succinylbenzoic acid--CoA ligase                 |  |  |  |  |

|            |   |         |      |       |                                                                |  |  |  |
|------------|---|---------|------|-------|----------------------------------------------------------------|--|--|--|
| MSMEG_6673 | J |         | 1.08 | -0.49 | 6-aminohexanoate-cyclic-dimer hydrolase                        |  |  |  |
| pdxH       | H | Rv2607  | 1.07 | -1.26 | pyridoxamine 5'-phosphate oxidase                              |  |  |  |
| MSMEG_5512 | H | RV0958  | 1.07 | -0.48 | magnesium chelatase                                            |  |  |  |
| MSMEG_1069 | E |         | 1.07 | -0.09 | amino acid permease                                            |  |  |  |
| lspA       | U | Rv1539  | 1.07 | -0.01 | lipoprotein signal peptidase                                   |  |  |  |
| MSMEG_1376 | G | Rv0729  | 1.07 | -0.48 | xylulose kinase                                                |  |  |  |
| MSMEG_2576 | L |         | 1.07 | -0.43 | deoxyribodipyrimidine photo-lyase                              |  |  |  |
| MSMEG_5203 | S |         | 1.06 | 0.40  | DoxX subfamily protein                                         |  |  |  |
| MSMEG_6179 | I |         | 1.06 | 0.48  | acetyl-coenzyme A synthetase                                   |  |  |  |
| MSMEG_0741 | C |         | 1.06 | -0.63 | hypothetical protein                                           |  |  |  |
| MSMEG_1433 | Q |         | 1.06 | -0.38 | thioesterase                                                   |  |  |  |
| MSMEG_2738 | C | Rv1442  | 1.06 | -0.51 | biotin sulfoxide reductase                                     |  |  |  |
| MSMEG_2472 | K |         | 1.06 | 0.29  | AsnC family transcriptional regulator                          |  |  |  |
| MSMEG_1139 | K |         | 1.06 | -0.17 | transcriptional regulator                                      |  |  |  |
| MSMEG_5009 | V | RV1272C | 1.06 | 0.25  | ABC transporter                                                |  |  |  |
| MSMEG_2941 | G |         | 1.06 | 0.22  | NAD dependent epimerase/dehydratase                            |  |  |  |
| MSMEG_4969 | K |         | 1.06 | -0.14 | two-component system response regulator                        |  |  |  |
| MSMEG_1491 | E |         | 1.06 | -0.55 | histidinol-phosphate aminotransferase 2                        |  |  |  |
| MSMEG_4349 | O | RV2264C | 1.05 | -0.01 | hypothetical protein                                           |  |  |  |
| pth        | J | Rv1014c | 1.05 | -0.07 | peptidyl-tRNA hydrolase                                        |  |  |  |
| MSMEG_2492 | C |         | 1.05 | -0.44 | D-lactate dehydrogenase                                        |  |  |  |
| MSMEG_6802 | G |         | 1.05 | 0.02  | ABC transporter ATP-binding protein                            |  |  |  |
| MSMEG_5309 | K |         | 1.05 | -0.14 | hypothetical protein                                           |  |  |  |
| rplV       | J | Rv0706  | 1.05 | -0.35 | 50S ribosomal protein L22                                      |  |  |  |
| MSMEG_1463 | E |         | 1.05 | -0.14 | gamma-glutamyltranspeptidase                                   |  |  |  |
| pstA       | P | Rv0930  | 1.05 | 0.65  | phosphate ABC transporter permease                             |  |  |  |
| MSMEG_5795 | H | RV0812  | 1.05 | -0.25 | 4-amino-4-deoxychorismate lyase                                |  |  |  |
| MSMEG_6591 | E |         | 1.05 | -0.37 | class V aminotransferase                                       |  |  |  |
| MSMEG_0657 | R | RV3161C | 1.05 | -0.43 | Rieske (2Fe-2S) domain-containing protein                      |  |  |  |
| MSMEG_5906 | I | Rv3504  | 1.05 | 0.79  | acyl-CoA dehydrogenase                                         |  |  |  |
| MSMEG_0862 | H | Rv0866  | 1.05 | 0.43  | molybdopterin biosynthesis protein MoeA                        |  |  |  |
| MSMEG_0244 | K |         | 1.05 | -0.02 | two component response transcriptional regulatory protein prra |  |  |  |
| MSMEG_1219 | E |         | 1.05 | -0.74 | ABC transporter permease                                       |  |  |  |
| MSMEG_3524 | Q |         | 1.05 | 0.03  | linalool 8-monooxygenase                                       |  |  |  |
| MSMEG_3269 | G |         | 1.05 | 0.16  | sugar ABC transporter ATP-binding protein                      |  |  |  |
| MSMEG_3856 | K |         | 1.04 | -0.01 | CadC family transcriptional regulator                          |  |  |  |
| MSMEG_4511 | Q | Rv2380c | 1.04 | -0.27 | linear gramicidin synthetase subunit B                         |  |  |  |
| MSMEG_1425 | R | RV0695  | 1.04 | -0.08 | creatininase subfamily protein                                 |  |  |  |
| MSMEG_0250 | R | Rv0206c | 1.04 | -0.07 | membrane protein, MmpL family protein                          |  |  |  |
| MSMEG_4217 | D |         | 1.04 | 0.13  | DivIVA protein                                                 |  |  |  |
| secG       | U | Rv1440  | 1.04 | -0.11 | preprotein translocase subunit SecG                            |  |  |  |
| MSMEG_1245 | H |         | 1.04 | 0.05  | phosphoadenosine phosphosulfate reductase                      |  |  |  |
| MSMEG_0619 | N | Rv0286  | 1.04 | -0.04 | PPE family protein                                             |  |  |  |
| MSMEG_2596 | R | RV2859C | 1.04 | -0.26 | peptidase C26                                                  |  |  |  |
| MSMEG_1701 | F |         | 1.04 | -0.02 | purine nucleoside phosphorylase                                |  |  |  |
| MSMEG_0090 | S |         | 1.04 | 0.33  | hypothetical protein                                           |  |  |  |
| pgm        | G | Rv3068c | 1.04 | 0.83  | phosphoglucomutase                                             |  |  |  |
| MSMEG_4502 | S |         | 1.04 | 0.06  | 16S ribosomal RNA methyltransferase RsmE                       |  |  |  |
| MSMEG_2733 | S | RV2728C | 1.04 | 0.21  | hypothetical protein                                           |  |  |  |



|            |   |         |       |       |                                                                                  |  |  |  |
|------------|---|---------|-------|-------|----------------------------------------------------------------------------------|--|--|--|
| MSMEG_5616 | R | RV0911  | -1.28 | 0.68  | glyoxalase/bleomycin resistance protein/dioxygenase                              |  |  |  |
| MSMEG_6768 | C |         | -1.39 | 0.13  | halogenase                                                                       |  |  |  |
| MSMEG_6769 | P |         | -1.03 | -0.03 | transporter monovalent cation:proton antiporter-2 (CPA2) family protein          |  |  |  |
| MSMEG_3364 | E |         | -1.44 | 0.02  | RhtB family protein transporter                                                  |  |  |  |
| MSMEG_4618 | Q |         | -1.60 | -0.21 | isochorismatase                                                                  |  |  |  |
| MSMEG_3536 | G |         | -1.38 | -0.14 | sugar transporter                                                                |  |  |  |
| MSMEG_5605 | C |         | -1.60 | -0.12 | cytochrome bd ubiquinol oxidase subunit I                                        |  |  |  |
| MSMEG_4318 | P |         | -1.02 | -0.10 | hypothetical protein                                                             |  |  |  |
| wrbA       | R |         | -1.08 | -0.39 | NAD(P)H:quinone oxidoreductase, type IV                                          |  |  |  |
| MSMEG_4063 | R |         | -1.08 | -0.02 | amidohydrolase                                                                   |  |  |  |
| MSMEG_2563 | Q |         | -1.21 | -0.23 | cytochrome P450                                                                  |  |  |  |
| MSMEG_5922 | I | Rv3522  | -1.27 | -0.25 | lipid-transfer protein                                                           |  |  |  |
| MSMEG_6734 | C |         | -2.01 | 0.07  | dibenzothiophene desulfurization enzyme A                                        |  |  |  |
| MSMEG_3726 | G |         | -1.76 | -0.59 | alcohol dehydrogenase                                                            |  |  |  |
| MSMEG_6885 | C |         | -1.93 | -0.82 | Mmcl protein                                                                     |  |  |  |
| MSMEG_4822 | C |         | -1.25 | 0.02  | hypothetical protein                                                             |  |  |  |
| MSMEG_1392 | C |         | -1.65 | -0.64 | alcohol dehydrogenase                                                            |  |  |  |
| recC       | L | Rv0631c | -1.14 | 0.08  | exodeoxyribonuclease V subunit gamma                                             |  |  |  |
| anmK       | O |         | -1.56 | -0.20 | anhydro-N-acetylmuramic acid kinase                                              |  |  |  |
| dnaA       | L | Rv0001  | -1.19 | -0.70 | chromosomal replication initiation protein                                       |  |  |  |
| cheR       | T |         | -1.47 | -0.52 | chemotaxis protein CheR                                                          |  |  |  |
| MSMEG_6264 | E |         | -1.44 | -0.21 | oxidoreductase                                                                   |  |  |  |
| MSMEG_2098 | Q |         | -1.15 | -0.04 | fumarylacetoacetate hydrolase                                                    |  |  |  |
| MSMEG_1972 | C |         | -1.12 | 0.02  | methane monooxygenase component C                                                |  |  |  |
| MSMEG_2846 | P |         | -1.10 | -0.16 | ABC transporter permease                                                         |  |  |  |
| MSMEG_3362 | I |         | -1.39 | -0.24 | enoyl-CoA hydratase                                                              |  |  |  |
| MSMEG_1228 | P |         | -1.03 | 0.38  | sulfatase                                                                        |  |  |  |
| MSMEG_2539 | J | RV0560C | -1.27 | -0.26 | thiopurine S-methyltransferase (tpmt) superfamily protein                        |  |  |  |
| MSMEG_4814 | I |         | -1.27 | 0.04  | hypothetical protein                                                             |  |  |  |
| MSMEG_3318 | C |         | -1.29 | -0.87 | oxidoreductase                                                                   |  |  |  |
| MSMEG_1570 | R |         | -1.02 | 0.02  | carboxylesterase                                                                 |  |  |  |
| MSMEG_2208 | I |         | -1.02 | 0.33  | acyl-CoA dehydrogenase                                                           |  |  |  |
| MSMEG_6710 | I |         | -1.17 | -0.49 | alpha/beta hydrolase                                                             |  |  |  |
| MSMEG_3994 | R |         | -1.07 | 0.30  | short chain dehydrogenase                                                        |  |  |  |
| MSMEG_1319 | Q |         | -1.09 | -0.10 | Asp/Glu racemase                                                                 |  |  |  |
| MSMEG_4420 | S |         | -1.89 | -0.50 | cupin                                                                            |  |  |  |
| MSMEG_3042 | F | Rv1379  | -1.15 | -0.37 | bifunctional pyrimidine regulatory protein PyrR/uracil phosphoribosyltransferase |  |  |  |
| MSMEG_3934 | G |         | -1.99 | -0.49 | phosphoenolpyruvate synthase                                                     |  |  |  |
| MSMEG_5124 | C | Rv1175c | -1.41 | -0.63 | 2,4-dienoyl-CoA reductase                                                        |  |  |  |
| MSMEG_2146 | S |         | -1.07 | 0.34  | gp15 protein                                                                     |  |  |  |
| MSMEG_1303 | K |         | -1.10 | 0.33  | transcriptional regulator                                                        |  |  |  |
| MSMEG_0447 | O |         | -1.28 | 0.21  | hypothetical protein                                                             |  |  |  |
| MSMEG_4646 | C | RV2455C | -1.15 | -0.46 | pyruvate synthase                                                                |  |  |  |
| MSMEG_3095 | G |         | -1.08 | -0.32 | D-ribose-binding periplasmic protein                                             |  |  |  |
| MSMEG_4387 | P |         | -1.52 | 0.21  | ABC transporter permease                                                         |  |  |  |
| MSMEG_4066 | Q |         | -1.12 | 0.19  | hypothetical protein                                                             |  |  |  |
| pcaG       | Q |         | -1.04 | 0.10  | protocatechuate 3,4-dioxygenase subunit alpha                                    |  |  |  |
| MSMEG_0635 | S | RV0309  | -1.68 | -0.43 | hypothetical protein                                                             |  |  |  |
| MSMEG_1448 | P |         | -1.36 | 0.18  | integral membrane transporter                                                    |  |  |  |

|            |   |         |       |       |                                                                                           |  |  |  |
|------------|---|---------|-------|-------|-------------------------------------------------------------------------------------------|--|--|--|
| pqqB       | R |         | -1.55 | 0.22  | pyrroloquinoline quinone biosynthesis protein PqqB                                        |  |  |  |
| ItaE       | E |         | -1.04 | 0.14  | L-threonine aldolase                                                                      |  |  |  |
| MSMEG_0351 | Q |         | -1.41 | -0.10 | virulence factor mce family protein                                                       |  |  |  |
| MSMEG_6367 | R | Rv3782  | -1.26 | -0.22 | glycosyl transferase family protein                                                       |  |  |  |
| MSMEG_5198 | I |         | -1.43 | -0.68 | carnitiny-CoA dehydratase                                                                 |  |  |  |
| MSMEG_6763 | R | RV0077C | -1.70 | 0.26  | oxidoreductase                                                                            |  |  |  |
| MSMEG_2194 | K |         | -1.04 | -0.54 | MerR family transcriptional regulator                                                     |  |  |  |
| MSMEG_0517 | G | RV2039C | -1.32 | 0.03  | sugar binding-protein dependent transporter system permease                               |  |  |  |
| MSMEG_0474 | M |         | -1.48 | 0.18  | glucosamine-fructose-6-phosphate aminotransferase (isomerizing)                           |  |  |  |
| MSMEG_5130 | E | Rv1166  | -1.35 | -0.46 | extracellular solute-binding protein                                                      |  |  |  |
| MSMEG_1797 | R |         | -1.11 | -0.43 | salicylate esterase                                                                       |  |  |  |
| MSMEG_1963 | R |         | -1.27 | -0.63 | transcriptional regulatory protein                                                        |  |  |  |
| MSMEG_6686 | I |         | -1.06 | -0.15 | glutaryl-CoA dehydrogenase                                                                |  |  |  |
| MSMEG_0288 | E |         | -1.39 | -0.23 | FAD dependent oxidoreductase                                                              |  |  |  |
| MSMEG_5372 | T | Rv1028c | -1.05 | -0.16 | sensor protein KdpD                                                                       |  |  |  |
| MSMEG_1086 | P |         | -1.67 | 0.14  | ABC transporter permease                                                                  |  |  |  |
| MSMEG_1297 | R |         | -1.21 | -0.23 | hydroxydechloroatrazine ethylaminohydrolase                                               |  |  |  |
| MSMEG_0734 | R |         | -1.02 | -0.16 | Rieske (2Fe-2S) domain-containing protein                                                 |  |  |  |
| MSMEG_4393 | G |         | -1.37 | 0.13  | carboxyvinyl-carboxyphosphonate phosphorylmutase                                          |  |  |  |
| MSMEG_3929 | C |         | -1.07 | 0.01  | [NiFe] hydrogenase subunit delta                                                          |  |  |  |
| MSMEG_1151 | K |         | -1.34 | -0.21 | DNA-binding protein                                                                       |  |  |  |
| MSMEG_4110 | I |         | -1.49 | -0.26 | 3-hydroxyacyl-CoA dehydrogenase                                                           |  |  |  |
| MSMEG_2254 | R |         | -1.12 | 1.17  | oxalate decarboxylase OxdC                                                                |  |  |  |
| kdpB       | P | Rv1030  | -1.04 | 0.11  | potassium-transporting ATPase subunit B                                                   |  |  |  |
| MSMEG_1034 | R |         | -1.18 | 0.00  | esterase                                                                                  |  |  |  |
| cysE       | E | Rv2335  | -1.03 | 0.06  | serine O-acetyltransferase                                                                |  |  |  |
| MSMEG_1486 | K |         | -1.07 | -0.28 | RNA polymerase sigma factor SigL                                                          |  |  |  |
| argB       | E | Rv1654  | -1.20 | -0.37 | acetylglutamate kinase                                                                    |  |  |  |
| MSMEG_4606 | D |         | -1.75 | -0.25 | hypothetical protein                                                                      |  |  |  |
| MSMEG_2081 | I | Rv3139  | -1.21 | -0.88 | acyl-CoA dehydrogenase                                                                    |  |  |  |
| MSMEG_0902 | M | Rv0644c | -1.27 | -0.01 | cyclopropane-fatty-acyl-phospholipid synthase                                             |  |  |  |
| MSMEG_4879 | C |         | -1.49 | -0.10 | hypothetical protein                                                                      |  |  |  |
| MSMEG_3579 | M | RV2434C | -1.36 | -0.22 | transmembrane protein                                                                     |  |  |  |
| MSMEG_3809 | C |         | -1.43 | -0.03 | hypothetical protein                                                                      |  |  |  |
| MSMEG_6725 | R |         | -1.03 | 0.20  | ABC transporter ATP-binding protein                                                       |  |  |  |
| MSMEG_4809 | R |         | -1.65 | 0.02  | Rieske (2Fe-2S) domain-containing protein                                                 |  |  |  |
| MSMEG_4077 | I |         | -1.12 | 0.07  | enoyl-CoA hydratase                                                                       |  |  |  |
| MSMEG_6718 | G |         | -1.03 | -0.03 | transporter major facilitator family protein                                              |  |  |  |
| MSMEG_2102 | P |         | -1.19 | -0.35 | nitrate transport ATP-binding protein NrtD                                                |  |  |  |
| MSMEG_2229 | I |         | -1.55 | 0.40  | enoyl-CoA hydratase                                                                       |  |  |  |
| MSMEG_1796 | C |         | -1.72 | -0.96 | membrane protein                                                                          |  |  |  |
| MSMEG_4853 | E |         | -1.18 | -0.08 | peptidase, M24 family protein                                                             |  |  |  |
| MSMEG_3017 | S | RV2567  | -1.27 | 0.06  | hypothetical protein                                                                      |  |  |  |
| MSMEG_4731 | Q | Rv1521  | -1.32 | -0.19 | acyl-CoA synthetase                                                                       |  |  |  |
| MSMEG_3090 | G |         | -1.10 | -0.10 | ribose transporter permease RbsC                                                          |  |  |  |
| MSMEG_3970 | J | RV3175  | -1.13 | -0.14 | glutamyl-tRNA(Gln) amidotransferase subunit A                                             |  |  |  |
| MSMEG_2209 | K |         | -1.63 | -0.56 | GntR family transcriptional regulator                                                     |  |  |  |
| MSMEG_2845 | P |         | -1.29 | 0.07  | ABC transporter permease                                                                  |  |  |  |
| purH       | F | Rv0957  | -1.16 | -0.75 | bifunctional phosphoribosylaminoimidazolecarboxamide formyltransferase/IMP cyclohydrolase |  |  |  |

|            |   |         |       |       |                                                           |  |  |  |  |
|------------|---|---------|-------|-------|-----------------------------------------------------------|--|--|--|--|
| MSMEG_3378 | V |         | -1.80 | -0.58 | beta-lactamase                                            |  |  |  |  |
| MSMEG_0125 | S |         | -1.41 | -0.20 | integral membrane protein                                 |  |  |  |  |
| MSMEG_5579 | K |         | -1.26 | -0.09 | MarR family transcriptional regulator                     |  |  |  |  |
| MSMEG_1155 | I |         | -1.27 | 0.08  | carnitiny-CoA dehydratase                                 |  |  |  |  |
| MSMEG_4521 | P |         | -1.24 | -0.17 | Tat (twin-arginine translocation) pathway signal sequence |  |  |  |  |
| MSMEG_0506 | G |         | -1.37 | 0.00  | ABC transporter permease                                  |  |  |  |  |
| MSMEG_0487 | P |         | -1.00 | 0.10  | ABC transporter permease                                  |  |  |  |  |
| MSMEG_5520 | C | RV0953C | -1.15 | 0.54  | hypothetical protein                                      |  |  |  |  |
| MSMEG_1964 | C | RV1774  | -1.08 | 0.41  | mitomycin radical oxidase                                 |  |  |  |  |
| MSMEG_3657 | C | RV1817  | -1.35 | -0.21 | hypothetical protein                                      |  |  |  |  |
| MSMEG_6389 | M | Rv3795  | -1.37 | -0.16 | arabinoxyltransferase A                                   |  |  |  |  |
| MSMEG_0534 | G |         | -1.34 | -0.12 | permease, major facilitator family protein                |  |  |  |  |
| MSMEG_4422 | C |         | -1.08 | 0.25  | oxidoreductase                                            |  |  |  |  |
| MSMEG_2096 | R |         | -2.15 | -0.84 | integral membrane protein                                 |  |  |  |  |
| MSMEG_4135 | R |         | -1.16 | 0.25  | lysine decarboxylase superfamily protein                  |  |  |  |  |
| MSMEG_0293 | R |         | -1.08 | 0.11  | Rieske (2Fe-2S) domain-containing protein                 |  |  |  |  |
| MSMEG_1137 | E |         | -1.35 | -0.37 | amino acid permease                                       |  |  |  |  |
| MSMEG_2069 | R |         | -1.00 | 0.34  | phosphotransferase enzyme family protein                  |  |  |  |  |
| MSMEG_6263 | E |         | -1.08 | 0.20  | glutamate synthase                                        |  |  |  |  |
| MSMEG_2108 | R |         | -1.09 | -0.70 | hypothetical protein                                      |  |  |  |  |
| MSMEG_0149 | H | Rv0423c | -1.04 | -0.17 | thiamine biosynthesis protein ThiC                        |  |  |  |  |
| MSMEG_2810 | G |         | -1.12 | -0.11 | major facilitator superfamily protein                     |  |  |  |  |
| MSMEG_6712 | C |         | -1.36 | 0.55  | maleylacetate reductase                                   |  |  |  |  |
| MSMEG_5609 | Q | RV0913C | -1.22 | 0.90  | carotenoid oxygenase                                      |  |  |  |  |
| MSMEG_2005 | G |         | -1.33 | 0.66  | sugar phosphate isomerase/epimerase                       |  |  |  |  |
| MSMEG_2807 | K |         | -1.43 | -0.12 | two-component system response regulator                   |  |  |  |  |
| MSMEG_3557 | E |         | -1.09 | 0.56  | amino acid permease                                       |  |  |  |  |
| MSMEG_5593 | H |         | -1.24 | 0.12  | pyruvate dehydrogenase                                    |  |  |  |  |
| MSMEG_2909 | R |         | -1.20 | 0.18  | starvation-sensing protein RspA                           |  |  |  |  |
| MSMEG_5954 | M |         | -1.30 | -0.32 | cell surface polysaccharide biosynthesis                  |  |  |  |  |
| MSMEG_3346 | G |         | -1.63 | -0.04 | hydroxyacid aldolase                                      |  |  |  |  |
| MSMEG_0174 | S |         | -1.14 | 0.32  | inner membrane protein                                    |  |  |  |  |
| MSMEG_2657 | R | RV2782C | -1.19 | -0.11 | peptidase, M16 family protein                             |  |  |  |  |
| MSMEG_5021 | R |         | -1.33 | 0.06  | alcohol dehydrogenase                                     |  |  |  |  |
| MSMEG_0170 | G |         | -1.77 | -0.84 | transmembrane transporter                                 |  |  |  |  |
| MSMEG_5509 | R |         | -1.07 | 0.10  | hypothetical protein                                      |  |  |  |  |
| MSMEG_5364 | R |         | -1.29 | -0.13 | amidohydrolase                                            |  |  |  |  |
| MSMEG_5420 | P |         | -1.15 | -0.05 | Tat-translocated enzyme                                   |  |  |  |  |
| MSMEG_6872 | V |         | -1.41 | 0.17  | beta-lactamase                                            |  |  |  |  |
| MSMEG_4062 | J |         | -1.19 | 0.08  | glutamyl-tRNA(Gln) amidotransferase subunit A             |  |  |  |  |
| MSMEG_3991 | R |         | -1.12 | 0.48  | cyclase                                                   |  |  |  |  |
| MSMEG_4049 | G |         | -1.31 | -0.02 | sugar transporter permease                                |  |  |  |  |
| rpsO       | J | Rv2785c | -1.06 | 0.08  | 30S ribosomal protein S15                                 |  |  |  |  |
| MSMEG_2464 | C |         | -1.65 | 0.20  | 2Fe-2S-binding domain-containing protein                  |  |  |  |  |
| MSMEG_6745 | K |         | -1.07 | -0.01 | GntR family transcriptional regulator                     |  |  |  |  |
| MSMEG_2067 | H | RV2675C | -1.30 | -0.27 | methyltransferase type 12                                 |  |  |  |  |
| MSMEG_4093 | C | RV2298  | -1.25 | 0.12  | oxidoreductase, aldo/keto reductase                       |  |  |  |  |
| MSMEG_0654 | C |         | -1.03 | 0.16  | hypothetical protein                                      |  |  |  |  |
| MSMEG_4092 | C |         | -1.05 | -0.48 | alkanal monooxygenase                                     |  |  |  |  |



|            |   |         |       |       |                                                                        |  |  |  |  |
|------------|---|---------|-------|-------|------------------------------------------------------------------------|--|--|--|--|
| MSMEG_1506 | S |         | -1.21 | 0.29  | TetR family transcriptional regulator                                  |  |  |  |  |
| MSMEG_6296 | R |         | -1.41 | 0.62  | 5-exo-alcohol dehydrogenase                                            |  |  |  |  |
| MSMEG_0438 | P | RV0265C | -1.23 | 0.02  | periplasmic binding protein                                            |  |  |  |  |
| MSMEG_4793 | Q |         | -1.10 | 0.23  | virulence factor Mce family protein                                    |  |  |  |  |
| MSMEG_2981 | E |         | -1.62 | -0.47 | branched-chain amino acid ABC transporter permease                     |  |  |  |  |
| cadA       | P | Rv1469  | -1.07 | -0.06 | cadmium-translocating P-type ATPase                                    |  |  |  |  |
| MSMEG_3517 | E |         | -1.14 | -0.11 | HAD-superfamily hydrolase                                              |  |  |  |  |
| MSMEG_4456 | S | RV2313C | -1.16 | -0.12 | hypothetical protein                                                   |  |  |  |  |
| MSMEG_0339 | C | RV3520C | -1.26 | -0.07 | FMN-dependent monooxygenase                                            |  |  |  |  |
| MSMEG_6795 | I |         | -1.91 | -0.48 | enoyl-CoA hydratase/isomerase                                          |  |  |  |  |
| MSMEG_2772 | E | RV2690C | -1.35 | 0.50  | amino acid permease                                                    |  |  |  |  |
| argS       | J | Rv1292  | -1.37 | -0.13 | arginyl-tRNA synthetase                                                |  |  |  |  |
| MSMEG_5839 | E | Rv0781  | -1.12 | -0.08 | protease 2                                                             |  |  |  |  |
| MSMEG_3411 | S |         | -1.03 | 0.37  | MOSC domain-containing protein                                         |  |  |  |  |
| MSMEG_3367 | R |         | -1.17 | 0.47  | short-chain dehydrogenase/reductase SDR                                |  |  |  |  |
| tgt        | J |         | -1.07 | -0.17 | queuine tRNA-ribosyltransferase                                        |  |  |  |  |
| MSMEG_0126 | R |         | -1.29 | 0.18  | mandelate racemase/muconate lactonizing enzyme                         |  |  |  |  |
| MSMEG_4949 | J | Rv1300  | -1.23 | 0.02  | HemK family modification methylase                                     |  |  |  |  |
| MSMEG_6237 | H |         | -1.22 | 0.08  | hypothetical protein                                                   |  |  |  |  |
| MSMEG_6908 | K | RV0043C | -1.09 | -0.47 | HTH-type transcriptional regulator                                     |  |  |  |  |
| MSMEG_4020 | I |         | -1.11 | 0.25  | enoyl-CoA hydratase/isomerase                                          |  |  |  |  |
| MSMEG_4610 | Q |         | -1.07 | 0.21  | IgiC                                                                   |  |  |  |  |
| glyS       | J |         | -1.34 | -0.09 | glycyl-tRNA synthetase                                                 |  |  |  |  |
| MSMEG_5979 | J |         | -1.10 | -0.01 | transferase                                                            |  |  |  |  |
| MSMEG_0205 | S |         | -1.67 | -0.86 | tetracenomycin polyketide synthesis hydroxylase TcmH                   |  |  |  |  |
| MSMEG_4008 | R |         | -1.30 | 0.17  | oxidoreductase, 2OG-Fe(II) oxygenase                                   |  |  |  |  |
| MSMEG_5671 | S |         | -1.12 | 0.07  | prolyl-tRNA synthetase                                                 |  |  |  |  |
| MSMEG_1452 | S |         | -1.20 | 0.03  | sulfatase-modifying factor 1                                           |  |  |  |  |
| MSMEG_3556 | H |         | -1.40 | -0.09 | integral membrane transporter                                          |  |  |  |  |
| MSMEG_0461 | S |         | -1.53 | 0.07  | CinZ protein                                                           |  |  |  |  |
| MSMEG_3731 | E |         | -1.40 | -0.24 | dipeptidase 2                                                          |  |  |  |  |
| MSMEG_6317 | E |         | -1.18 | -0.54 | lipolytic protein G-D-S-L                                              |  |  |  |  |
| MSMEG_6660 | F |         | -1.09 | 0.08  | permease, cytosine/purines, uracil, thiamine, allantoin family protein |  |  |  |  |
| MSMEG_1231 | S | RV2272  | -1.06 | 0.11  | inner membrane protein YidH                                            |  |  |  |  |
| MSMEG_6639 | K |         | -1.03 | -0.06 | GntR family transcriptional regulator                                  |  |  |  |  |
| MSMEG_0545 | T | RV0386  | -1.32 | 0.00  | LuxR family transcriptional regulator                                  |  |  |  |  |
| MSMEG_5818 | Q | Rv0169  | -1.29 | 0.50  | virulence factor Mce family protein                                    |  |  |  |  |
| MSMEG_4056 | G |         | -1.06 | -0.02 | hypothetical protein                                                   |  |  |  |  |
| MSMEG_3812 | I |         | -1.05 | -0.35 | acyl-CoA thioesterase                                                  |  |  |  |  |
| MSMEG_0157 | H | Rv0118c | -1.25 | -0.10 | oxalyl-CoA decarboxylase                                               |  |  |  |  |
| MSMEG_5812 | R |         | -1.23 | -0.19 | short chain dehydrogenase                                              |  |  |  |  |
| MSMEG_4082 | C |         | -1.33 | -0.19 | monooxygenase                                                          |  |  |  |  |
| MSMEG_3563 | G | RV1877  | -1.19 | -0.32 | drug transporter                                                       |  |  |  |  |
| MSMEG_5416 | M | Rv1022  | -1.05 | -0.10 | LpqU protein                                                           |  |  |  |  |
| MSMEG_1154 | C |         | -1.25 | 0.59  | formyl-coenzyme A transferase                                          |  |  |  |  |
| MSMEG_3273 | G |         | -1.20 | -0.08 | glutamyl aminopeptidase, M42 family protein                            |  |  |  |  |
| MSMEG_2172 | P |         | -1.03 | 0.06  | dicarboxylate-carrier protein                                          |  |  |  |  |
| MSMEG_3960 | K |         | -1.08 | -0.15 | transcriptional regulator                                              |  |  |  |  |
| MSMEG_0281 | E |         | -1.60 | 0.24  | choline dehydrogenase                                                  |  |  |  |  |

|            |   |         |       |       |                                                         |  |  |  |
|------------|---|---------|-------|-------|---------------------------------------------------------|--|--|--|
| rpsF       | J | Rv0053  | -1.00 | -0.25 | 30S ribosomal protein S6                                |  |  |  |
| MSMEG_4844 | I |         | -1.09 | -0.07 | acyl-CoA dehydrogenase                                  |  |  |  |
| MSMEG_4736 | S |         | -1.18 | -0.52 | hypothetical protein                                    |  |  |  |
| MSMEG_5615 | S |         | -1.17 | 0.33  | hypothetical protein                                    |  |  |  |
| MSMEG_2165 | G |         | -1.39 | 0.30  | transketolase                                           |  |  |  |
| MSMEG_6459 | E | Rv3859c | -1.02 | -0.07 | ferredoxin-dependent glutamate synthase 1               |  |  |  |
| MSMEG_2525 | E |         | -1.19 | -0.47 | amino acid permease                                     |  |  |  |
| MSMEG_0535 | K |         | -1.39 | 0.33  | GntR family transcriptional regulator                   |  |  |  |
| MSMEG_5948 | M |         | -1.23 | -0.06 | glycosyl transferase family protein                     |  |  |  |
| MSMEG_0546 | H |         | -1.30 | -0.02 | hypothetical protein                                    |  |  |  |
| MSMEG_2544 | K |         | -1.42 | -0.21 | LysR family transcriptional regulator                   |  |  |  |
| MSMEG_4154 | L | RV3431C | -1.53 | 0.13  | transposase, Mutator family protein                     |  |  |  |
| MSMEG_0376 | K |         | -1.20 | 0.20  | AraC family transcriptional regulator                   |  |  |  |
| mhpA       | C |         | -1.31 | 0.15  | 3-(3-hydroxyphenyl)propionate hydroxylase               |  |  |  |
| MSMEG_5984 | M |         | -1.06 | -0.02 | UDP-phosphate galactosephosphotransferase               |  |  |  |
| MSMEG_4123 | I |         | -1.03 | -0.11 | 3-hydroxyisobutyrate dehydrogenase                      |  |  |  |
| MSMEG_2007 | Q |         | -1.13 | 0.09  | HpcE protein                                            |  |  |  |
| MSMEG_0511 | M |         | -1.02 | 0.56  | sugar isomerase                                         |  |  |  |
| MSMEG_4075 | C |         | -1.28 | -0.14 | CoA-binding protein                                     |  |  |  |
| hypB       | K |         | -1.00 | -0.27 | hydrogenase nickel incorporation protein HypB           |  |  |  |
| MSMEG_0350 | Q | Rv1970  | -1.02 | 0.22  | virulence factor Mce family protein                     |  |  |  |
| MSMEG_3382 | K |         | -1.04 | -0.01 | ArsR family transcriptional regulator                   |  |  |  |
| MSMEG_0778 | K |         | -1.50 | 0.53  | transcriptional regulator                               |  |  |  |
| MSMEG_6705 | K |         | -1.28 | 0.15  | regulatory protein                                      |  |  |  |
| MSMEG_4103 | C |         | -1.24 | 0.25  | alkanesulfonate monooxygenase                           |  |  |  |
| MSMEG_2982 | E |         | -1.02 | 0.22  | periplasmic binding protein                             |  |  |  |
| MSMEG_2538 | K | RV2887  | -1.46 | 0.23  | MarR family transcriptional regulator                   |  |  |  |
| MSMEG_2844 | R |         | -1.59 | -0.06 | ABC transporter ATP-binding protein                     |  |  |  |
| MSMEG_2918 | R |         | -1.18 | 0.20  | short-chain dehydrogenase/reductase SDR                 |  |  |  |
| MSMEG_6880 | E |         | -1.01 | 0.20  | hydrophobic amino acid ABC transporter                  |  |  |  |
| MSMEG_0117 | R | RV1190  | -1.28 | -0.56 | hydrolase                                               |  |  |  |
| MSMEG_2011 | K |         | -1.01 | -0.32 | LacI family transcriptional regulator                   |  |  |  |
| MSMEG_0341 | C |         | -1.63 | -0.18 | hypothetical protein                                    |  |  |  |
| MSMEG_0475 | M |         | -1.33 | 0.25  | nucleotide-sugar dehydrogenase                          |  |  |  |
| MSMEG_3373 | G |         | -1.42 | -0.31 | major facilitator superfamily protein                   |  |  |  |
| MSMEG_3544 | C |         | -1.19 | 0.36  | hypothetical protein                                    |  |  |  |
| MSMEG_5810 | C |         | -1.84 | 0.44  | monooxygenase                                           |  |  |  |
| MSMEG_0531 | I |         | -1.31 | -0.05 | acyl-CoA dehydrogenase                                  |  |  |  |
| MSMEG_4396 | Q |         | -1.21 | 0.12  | isochorismatase hydrolase                               |  |  |  |
| MSMEG_1133 | H | Rv0562  | -1.33 | -0.15 | bifunctional short chain isoprenyl diphosphate synthase |  |  |  |
| MSMEG_4023 | C | RV0794C | -1.24 | 0.39  | oxidoreductase                                          |  |  |  |
| MSMEG_6242 | C |         | -1.81 | 0.49  | alcohol dehydrogenase                                   |  |  |  |
| MSMEG_1222 | L |         | -1.35 | 0.35  | ISMsm6, transposase                                     |  |  |  |
| MSMEG_0881 | S |         | -1.10 | -0.06 | hypothetical protein                                    |  |  |  |
| rpsT       | J | Rv2412  | -1.06 | -0.13 | 30S ribosomal protein S20                               |  |  |  |
| sucD       | C | Rv0952  | -1.03 | 0.22  | succinyl-CoA synthetase subunit alpha                   |  |  |  |
| MSMEG_2297 | O |         | -1.22 | -0.76 | glutaredoxin                                            |  |  |  |
| MSMEG_3157 | S | RV1491C | -1.05 | -0.15 | hypothetical protein                                    |  |  |  |
| hypF       | O |         | -1.24 | 0.05  | [NiFe] hydrogenase maturation protein HypF              |  |  |  |

|            |   |         |       |       |                                                                         |  |  |  |  |
|------------|---|---------|-------|-------|-------------------------------------------------------------------------|--|--|--|--|
| MSMEG_6358 | S |         | -1.15 | 0.31  | mesocentin                                                              |  |  |  |  |
| MSMEG_2908 | G |         | -1.04 | -0.14 | 2-keto-3-deoxygluconate kinase                                          |  |  |  |  |
| MSMEG_6340 | R |         | -1.12 | 0.26  | short-chain dehydrogenase/reductase SDR                                 |  |  |  |  |
| MSMEG_2924 | M |         | -1.21 | 0.18  | permease binding-protein component                                      |  |  |  |  |
| MSMEG_2926 | E |         | -1.10 | 0.22  | glycine betaine/carnitine/choline transport ATP-binding protein opuCA   |  |  |  |  |
| MSMEG_5443 | C |         | -1.10 | -0.04 | dehydrogenase                                                           |  |  |  |  |
| MSMEG_0781 | E |         | -1.46 | -0.13 | amino acid permease                                                     |  |  |  |  |
| MSMEG_0326 | Q |         | -1.50 | -0.18 | AMP-dependent synthetase/ligase                                         |  |  |  |  |
| MSMEG_6939 | D | Rv3918c | -1.29 | -0.11 | Soj family protein                                                      |  |  |  |  |
| MSMEG_1458 | H |         | -1.32 | 0.29  | tena/thi-4 family protein                                               |  |  |  |  |
| MSMEG_4855 | R |         | -1.40 | 0.16  | amidohydrolase                                                          |  |  |  |  |
| hisG       | E | Rv2121c | -1.05 | 0.26  | ATP phosphoribosyltransferase                                           |  |  |  |  |
| MSMEG_3715 | Q |         | -1.56 | -0.17 | linear gramicidin synthetase subunit C                                  |  |  |  |  |
| MSMEG_5394 | P | Rv1031  | -1.01 | -0.01 | potassium-transporting ATPase subunit C                                 |  |  |  |  |
| MSMEG_0147 | I |         | -1.43 | -0.42 | C-5 sterol desaturase                                                   |  |  |  |  |
| MSMEG_4074 | R |         | -1.13 | -0.53 | peroxisomal trans-2-enoyl-CoA reductase                                 |  |  |  |  |
| MSMEG_3987 | C |         | -1.30 | -0.25 | FAD dependent oxidoreductase                                            |  |  |  |  |
| MSMEG_4819 | C |         | -1.13 | -0.37 | hypothetical protein                                                    |  |  |  |  |
| MSMEG_4541 | R |         | -1.49 | 0.31  | ABC transporter ATP-binding protein                                     |  |  |  |  |
| MSMEG_2166 | G | Rv3379c | -1.15 | -0.39 | transketolase                                                           |  |  |  |  |
| MSMEG_3358 | S |         | -1.16 | -0.40 | YaeQ protein                                                            |  |  |  |  |
| MSMEG_6668 | P |         | -1.16 | 0.29  | ABC transporter periplasmic protein                                     |  |  |  |  |
| MSMEG_4119 | I |         | -1.20 | 0.76  | 3-hydroxybutyryl-CoA dehydratase                                        |  |  |  |  |
| MSMEG_0151 | C | Rv0156  | -1.40 | -0.39 | PntAB protein                                                           |  |  |  |  |
| MSMEG_6851 | R | RV1910C | -1.44 | -0.09 | phosphatidylethanolamine-binding protein                                |  |  |  |  |
| MSMEG_4357 | R |         | -1.32 | -0.15 | ABC transporter ATP-binding protein                                     |  |  |  |  |
| MSMEG_0514 | G |         | -1.25 | -0.02 | alpha-galactosidase                                                     |  |  |  |  |
| MSMEG_0270 | R |         | -1.06 | 0.24  | aminoglycoside phosphotransferase                                       |  |  |  |  |
| hydA       | F |         | -1.33 | 0.00  | phenylhydantoinase                                                      |  |  |  |  |
| MSMEG_6695 | Q |         | -1.11 | 0.73  | cytochrome P450                                                         |  |  |  |  |
| MSMEG_4551 | C |         | -1.01 | -0.13 | monooxygenase                                                           |  |  |  |  |
| MSMEG_2236 | I |         | -1.29 | 0.22  | thiolase                                                                |  |  |  |  |
| MSMEG_3216 | O | Rv1608c | -1.08 | 0.33  | peroxiredoxin Q                                                         |  |  |  |  |
| MSMEG_6911 | E |         | -1.30 | 0.10  | ABC transporter ATP-binding protein                                     |  |  |  |  |
| MSMEG_0338 | I |         | -1.58 | 0.07  | acyl-CoA dehydrogenase                                                  |  |  |  |  |
| MSMEG_3006 | C |         | -1.18 | 0.08  | Fe-dependent alcohol dehydrogenase                                      |  |  |  |  |
| MSMEG_0185 | R |         | -1.10 | -0.39 | MmpL6 protein                                                           |  |  |  |  |
| MSMEG_1138 | C |         | -1.01 | -0.18 | alcohol dehydrogenase                                                   |  |  |  |  |
| MSMEG_5595 | K |         | -1.00 | 0.08  | MarR family transcriptional regulator                                   |  |  |  |  |
| araB       | C |         | -1.66 | -0.12 | ribulokinase                                                            |  |  |  |  |
| MSMEG_3664 | P | RV3236C | -1.01 | -0.39 | transporter monovalent cation:proton antiporter-2 (CPA2) family protein |  |  |  |  |
| MSMEG_4118 | I |         | -1.48 | 0.27  | acyl-CoA dehydrogenase                                                  |  |  |  |  |
| MSMEG_2554 | R |         | -1.04 | -0.02 | phosphotransferase enzyme family protein                                |  |  |  |  |
| glnT       | E |         | -1.12 | -0.17 | glutamine synthetase                                                    |  |  |  |  |
| MSMEG_1177 | F |         | -1.45 | 0.03  | cytosine/purines uracil thiamine allantoin permease                     |  |  |  |  |
| kdpA       | P | Rv1029  | -1.05 | -0.07 | potassium-transporting ATPase A                                         |  |  |  |  |
| MSMEG_4850 | R |         | -1.12 | -0.37 | short-chain dehydrogenase/reductase SDR                                 |  |  |  |  |
| MSMEG_3730 | K |         | -1.21 | -0.03 | Fis family transcriptional regulator                                    |  |  |  |  |
| MSMEG_6708 | R | Rv0134  | -1.00 | -0.33 | epoxide hydrolase                                                       |  |  |  |  |

|            |   |         |       |       |                                                               |  |  |  |  |
|------------|---|---------|-------|-------|---------------------------------------------------------------|--|--|--|--|
| MSMEG_1152 | G |         | -1.44 | 0.41  | citrate-proton symporter                                      |  |  |  |  |
| MSMEG_3982 | I |         | -1.64 | -0.01 | acyl-CoA dehydrogenase                                        |  |  |  |  |
| MSMEG_6838 | R |         | -1.15 | 0.17  | esterase                                                      |  |  |  |  |
| MSMEG_4039 | C |         | -1.35 | 0.11  | aryl-alcohol dehydrogenase                                    |  |  |  |  |
| MSMEG_2311 | R |         | -1.33 | -0.06 | hypothetical protein                                          |  |  |  |  |
| MSMEG_2681 | R | Rv0840c | -1.14 | 0.01  | proline imino-peptidase                                       |  |  |  |  |
| purC       | F | Rv0780  | -1.06 | 0.12  | phosphoribosylaminoimidazole-succinocarboxamide synthase      |  |  |  |  |
| MSMEG_0481 | C |         | -1.52 | 0.58  | FAD dependent oxidoreductase                                  |  |  |  |  |
| MSMEG_1123 | R |         | -1.09 | 0.10  | cobalamin synthesis protein                                   |  |  |  |  |
| MSMEG_4801 | R |         | -1.05 | 0.02  | carveol dehydrogenase                                         |  |  |  |  |
| MSMEG_6525 | A |         | -1.56 | -0.35 | hypothetical protein                                          |  |  |  |  |
| MSMEG_1330 | K |         | -1.13 | -0.06 | MarR family transcriptional regulator                         |  |  |  |  |
| MSMEG_0212 | S |         | -1.02 | 0.14  | lyase                                                         |  |  |  |  |
| MSMEG_1117 | K |         | -1.15 | 0.37  | transcriptional regulator                                     |  |  |  |  |
| MSMEG_5024 | L |         | -1.62 | -0.13 | T/U mismatch-specific DNA glycosylase                         |  |  |  |  |
| MSMEG_5581 | S |         | -1.04 | 0.12  | hypothetical protein                                          |  |  |  |  |
| MSMEG_3400 | J | Rv3375  | -1.31 | 0.12  | glutamyl-tRNA(Gln) amidotransferase subunit A                 |  |  |  |  |
| MSMEG_0508 | G | RV2038C | -1.01 | -0.33 | glycerol-phosphate porter                                     |  |  |  |  |
| MSMEG_4112 | Q |         | -1.58 | 0.43  | cyclohexanecarboxylate-CoA ligase                             |  |  |  |  |
| MSMEG_6790 | G |         | -1.02 | -0.06 | AP endonuclease, family protein 2                             |  |  |  |  |
| MSMEG_3578 | T | RV2435C | -1.07 | -0.36 | cyclase                                                       |  |  |  |  |
| MSMEG_1451 | P | Rv0711  | -1.23 | -0.70 | arylsulfatase                                                 |  |  |  |  |
| MSMEG_2549 | G | RV1672C | -1.25 | -0.47 | major facilitator superfamily protein                         |  |  |  |  |
| MSMEG_4740 | C |         | -1.25 | 0.25  | glycosyltransferase 28                                        |  |  |  |  |
| MSMEG_0524 | R |         | -1.00 | 0.26  | short chain dehydrogenase                                     |  |  |  |  |
| MSMEG_6835 | I |         | -1.44 | -0.02 | Fatty acid desaturase                                         |  |  |  |  |
| MSMEG_0476 | M |         | -1.10 | 0.42  | chitin synthase                                               |  |  |  |  |
| narH       | C | Rv1162  | -1.35 | -0.06 | nitrate reductase subunit beta                                |  |  |  |  |
| MSMEG_0349 | Q | Rv1969  | -1.32 | 0.57  | virulence factor mce family protein                           |  |  |  |  |
| MSMEG_2217 | Q |         | -1.55 | 0.09  | AMP-dependent synthetase/ligase                               |  |  |  |  |
| MSMEG_2912 | G |         | -1.34 | -0.13 | inner membrane metabolite transporter YdfJ                    |  |  |  |  |
| MSMEG_1795 | R |         | -1.35 | 0.16  | 2-deoxy-scyllo-inosamine dehydrogenase                        |  |  |  |  |
| MSMEG_2812 | I |         | -1.23 | -0.23 | C-5 sterol desaturase                                         |  |  |  |  |
| MSMEG_2677 | R |         | -1.52 | 0.01  | large membrane protein                                        |  |  |  |  |
| rbsR       | K |         | -1.40 | -0.19 | ribose operon repressor                                       |  |  |  |  |
| MSMEG_1390 | I | Rv0675  | -1.05 | 0.33  | enoyl-CoA hydratase                                           |  |  |  |  |
| MSMEG_1798 | G |         | -1.02 | -0.24 | major facilitator superfamily protein                         |  |  |  |  |
| MSMEG_0486 | P |         | -1.30 | -0.11 | ABC transporter periplasmic protein                           |  |  |  |  |
| MSMEG_5626 | C |         | -1.13 | 0.04  | luciferase                                                    |  |  |  |  |
| pstS       | P |         | -1.09 | 0.07  | phosphate ABC transporter substrate-binding protein           |  |  |  |  |
| MSMEG_2537 | G |         | -1.14 | 0.31  | transporter protein                                           |  |  |  |  |
| MSMEG_1840 | C | Rv3251c | -1.02 | -0.18 | rubredoxin                                                    |  |  |  |  |
| MSMEG_3436 | S | RV0366C | -1.02 | -0.25 | hypothetical protein                                          |  |  |  |  |
| MSMEG_3434 | O |         | -1.04 | -0.09 | peptidyl-prolyl cis-trans isomerase domain-containing protein |  |  |  |  |
| MSMEG_4472 | G |         | -1.09 | -0.02 | multidrug-efflux transporter protein                          |  |  |  |  |
| MSMEG_2996 | C |         | -1.24 | -0.16 | hypothetical protein                                          |  |  |  |  |
| MSMEG_2856 | Q |         | -1.32 | 0.18  | virulence factor Mce family protein                           |  |  |  |  |
| MSMEG_0655 | R |         | -1.09 | 0.29  | glucose 1-dehydrogenase                                       |  |  |  |  |
| MSMEG_1220 | E |         | -1.47 | 0.00  | ABC transporter permease                                      |  |  |  |  |

|            |   |         |       |       |                                                      |  |  |  |
|------------|---|---------|-------|-------|------------------------------------------------------|--|--|--|
| MSMEG_1082 | K |         | -1.41 | -0.06 | response regulator                                   |  |  |  |
| MSMEG_3349 | Q |         | -1.41 | 0.30  | trap dicarboxylate transporter dctq subunit          |  |  |  |
| MSMEG_6874 | C |         | -1.35 | -0.09 | aldehyde dehydrogenase                               |  |  |  |
| MSMEG_1607 | R |         | -1.15 | -0.11 | tautomerase                                          |  |  |  |
| MSMEG_5728 | G |         | -1.00 | 0.22  | polysaccharide deacetylase                           |  |  |  |
| MSMEG_1780 | P |         | -1.37 | 0.21  | hypothetical protein                                 |  |  |  |
| MSMEG_0530 | R |         | -1.46 | -0.14 | short chain dehydrogenase                            |  |  |  |
| MSMEG_0343 | K |         | -1.07 | 0.18  | TetR family transcriptional regulator                |  |  |  |
| MSMEG_0543 | C |         | -1.18 | -0.08 | hypothetical protein                                 |  |  |  |
| MSMEG_2212 | R | RV2263  | -1.15 | 0.65  | short chain dehydrogenase                            |  |  |  |
| MSMEG_0158 | C |         | -1.14 | -0.95 | formyl-coenzyme A transferase                        |  |  |  |
| MSMEG_1140 | C |         | -1.35 | 0.60  | NAD(P)H-dependent glycerol-3-phosphate dehydrogenase |  |  |  |
| MSMEG_0515 | G |         | -1.79 | -0.21 | sugar transporter sugar binding lipoprotein          |  |  |  |
| MSMEG_1513 | C |         | -1.07 | 0.14  | hypothetical protein                                 |  |  |  |
| MSMEG_6309 | E |         | -1.28 | -0.05 | ABC transporter ATP-binding protein                  |  |  |  |
| MSMEG_3040 | V | RV1367C | -1.30 | -0.42 | beta-lactamase                                       |  |  |  |
| MSMEG_3805 | R |         | -1.16 | -0.15 | oxidoreductase, short chain dehydrogenase/reductase  |  |  |  |
| pcaH       | Q |         | -1.20 | 0.05  | protocatechuate 3,4-dioxygenase subunit beta         |  |  |  |
| MSMEG_3951 | I |         | -1.45 | -0.55 | hypothetical protein                                 |  |  |  |
| pqqE       | R |         | -1.13 | 0.03  | pyrroloquinoline quinone biosynthesis protein PqqE   |  |  |  |
| MSMEG_0824 | R | RV0421C | -1.15 | 0.11  | hypothetical protein                                 |  |  |  |
| MSMEG_4389 | C |         | -1.18 | 0.29  | monooxygenase, NtaA/SnaA/SoxA family protein         |  |  |  |
| MSMEG_0442 | K |         | -1.08 | -0.24 | tetracycline repressor domain-containing protein     |  |  |  |
| MSMEG_1751 | C | RV2298  | -1.20 | 0.11  | norsolorinic acid reductase                          |  |  |  |
| MSMEG_6765 | V |         | -1.15 | -0.07 | ABC transporter                                      |  |  |  |
| MSMEG_2894 | P |         | -1.38 | 0.32  | steroid monooxygenase                                |  |  |  |
| MSMEG_4765 | K |         | -1.30 | 0.07  | MerR family transcriptional regulator                |  |  |  |
| MSMEG_5953 | E |         | -1.06 | -0.28 | hypothetical protein                                 |  |  |  |
| MSMEG_0576 | R |         | -1.50 | 0.02  | Mmpl4 protein                                        |  |  |  |
| MSMEG_4785 | Q |         | -1.25 | -0.35 | mce-family protein mce1f                             |  |  |  |
| MSMEG_1979 | S |         | -1.37 | 0.40  | antibiotic biosynthesis monooxygenase                |  |  |  |
| MSMEG_1301 | K |         | -1.35 | -0.36 | hypothetical protein                                 |  |  |  |
| MSMEG_6774 | I |         | -1.34 | -0.07 | enoyl-CoA hydratase                                  |  |  |  |
| MSMEG_5494 | I | Rv0972c | -1.23 | 0.02  | acyl-CoA dehydrogenase                               |  |  |  |
| MSMEG_4087 | G |         | -1.26 | -0.19 | major facilitator superfamily protein                |  |  |  |
| MSMEG_0333 | I |         | -1.11 | -0.24 | carboxyl transferase domain-containing protein       |  |  |  |
| MSMEG_0284 | R |         | -1.30 | 0.14  | ribosylidihydronicotinamide dehydrogenase            |  |  |  |
| MSMEG_0484 | C |         | -1.28 | -0.12 | formamidase                                          |  |  |  |
| MSMEG_0772 | S |         | -1.32 | 0.13  | phytase                                              |  |  |  |
| MSMEG_5573 | G |         | -1.14 | -0.16 | sugar ABC transporter permease                       |  |  |  |
| rplM       | J | Rv3443c | -1.03 | -0.38 | 50S ribosomal protein L13                            |  |  |  |
| MSMEG_3449 | H |         | -1.16 | 0.11  | DNA-binding protein                                  |  |  |  |
| soxR       | K |         | -1.32 | 0.42  | redox-sensitive transcriptional activator SoxR       |  |  |  |
| MSMEG_1085 | P |         | -1.13 | -0.10 | dipeptide transporter permease DppB                  |  |  |  |
| MSMEG_4448 | T |         | -1.01 | -0.04 | transcriptional modulator of MazE                    |  |  |  |
| MSMEG_3248 | E |         | -1.10 | 0.04  | branched-chain amino acid ABC transporter permease   |  |  |  |
| MSMEG_2042 | R | RV3168  | -1.29 | 0.60  | phosphotransferase enzyme family protein             |  |  |  |
| MSMEG_3583 | C |         | -1.11 | 0.23  | monooxygenase                                        |  |  |  |
| MSMEG_4048 | R |         | -1.43 | -0.19 | cyclase                                              |  |  |  |

|            |   |         |       |       |                                                       |  |  |  |  |
|------------|---|---------|-------|-------|-------------------------------------------------------|--|--|--|--|
| MSMEG_2239 | K |         | -1.45 | -0.36 | TetR family transcriptional regulator                 |  |  |  |  |
| MSMEG_6469 | S | RV0140  | -1.27 | -0.17 | hypothetical protein                                  |  |  |  |  |
| MSMEG_4450 | E |         | -1.11 | -0.02 | alpha/beta hydrolase                                  |  |  |  |  |
| MSMEG_5109 | R |         | -1.06 | -0.89 | hypothetical protein                                  |  |  |  |  |
| MSMEG_6669 | R |         | -1.07 | -0.01 | ABC transporter permease                              |  |  |  |  |
| MSMEG_5565 | S |         | -1.35 | -0.25 | hypothetical protein                                  |  |  |  |  |
| MSMEG_1306 | C |         | -1.53 | 0.36  | aldehyde dehydrogenase                                |  |  |  |  |
| MSMEG_2171 | C |         | -1.44 | 0.53  | L-carnitine dehydratase/bile acid-inducible protein F |  |  |  |  |
| MSMEG_5802 | R |         | -1.21 | 0.64  | oxidoreductase, short chain dehydrogenase/reductase   |  |  |  |  |
| MSMEG_5194 | G |         | -1.01 | 0.16  | integral membrane protein                             |  |  |  |  |
| MSMEG_2978 | E |         | -1.33 | 0.16  | ABC transporter ATP-binding protein                   |  |  |  |  |
| MSMEG_4335 | R |         | -1.06 | 0.47  | diacylglycerol kinase                                 |  |  |  |  |
| MSMEG_5523 | E |         | -1.05 | -0.71 | peptidase                                             |  |  |  |  |
| MSMEG_6564 | K |         | -1.45 | -0.54 | TetR family transcriptional regulator                 |  |  |  |  |
| MSMEG_0148 | K |         | -1.41 | -0.02 | TetR family transcriptional regulator                 |  |  |  |  |
| MSMEG_6941 | R | RV3920C | -1.23 | -0.20 | R3H domain-containing protein                         |  |  |  |  |
| MSMEG_0128 | R | RV0163  | -1.41 | -0.17 | thioesterase                                          |  |  |  |  |
| MSMEG_4397 | K |         | -1.11 | 0.16  | MerR family transcriptional regulator                 |  |  |  |  |
| hybA       | C |         | -1.39 | -0.14 | hydrogenase-2, small subunit                          |  |  |  |  |
| narI       | C | Rv1164  | -1.78 | -0.27 | respiratory nitrate reductase subunit gamma           |  |  |  |  |
| MSMEG_1977 | R |         | -1.32 | -0.28 | alcohol dehydrogenase                                 |  |  |  |  |
| MSMEG_3905 | S | RV2117  | -1.01 | 0.02  | hypothetical protein                                  |  |  |  |  |
| MSMEG_4140 | E |         | -1.38 | 0.39  | GntR family transcriptional regulator                 |  |  |  |  |
| MSMEG_1281 | S |         | -1.07 | 0.13  | hypothetical protein                                  |  |  |  |  |
| MSMEG_2252 | C |         | -1.31 | 0.11  | flavin-type hydroxylase                               |  |  |  |  |
| MSMEG_2879 | I |         | -1.31 | -0.14 | acyl-CoA dehydrogenase                                |  |  |  |  |
| MSMEG_2162 | C |         | -1.72 | 0.81  | MmcI protein                                          |  |  |  |  |
| MSMEG_3301 | C |         | -1.40 | -0.22 | hypothetical protein                                  |  |  |  |  |
| MSMEG_4798 | C |         | -1.01 | -0.19 | L-carnitine dehydratase/bile acid-inducible protein F |  |  |  |  |
| MSMEG_0485 | J |         | -1.14 | 0.60  | amidase                                               |  |  |  |  |
| MSMEG_5632 | R |         | -1.23 | 0.28  | oxidoreductase, short chain dehydrogenase/reductase   |  |  |  |  |
| MSMEG_4102 | I |         | -1.58 | 0.32  | hypothetical protein                                  |  |  |  |  |
| MSMEG_1173 | K | RV2642  | -1.25 | -0.02 | ArsR family transcriptional regulator                 |  |  |  |  |
| MSMEG_0526 | E |         | -1.51 | 0.17  | oxidoreductase, GMC family protein                    |  |  |  |  |
| oppD       | P | RV1281C | -1.30 | 0.15  | ABC transporter ATP-binding protein                   |  |  |  |  |
| MSMEG_0817 | K |         | -1.01 | 0.07  | LysR family transcriptional regulator                 |  |  |  |  |
| MSMEG_2241 | Q |         | -1.03 | 0.24  | acyl-CoA synthetase                                   |  |  |  |  |
| MSMEG_4155 | L |         | -1.20 | 0.21  | transposase A                                         |  |  |  |  |
| MSMEG_1125 | K | RV2621C | -1.14 | 0.01  | ArsR family transcriptional regulator                 |  |  |  |  |
| MSMEG_1178 | K |         | -1.44 | -0.46 | transcriptional regulator                             |  |  |  |  |
| MSMEG_1509 | K |         | -1.17 | -0.77 | TetR family transcriptional regulator                 |  |  |  |  |
| MSMEG_2456 | C |         | -1.12 | -0.17 | 5,10-methylenetetrahydromethanopterin reductase       |  |  |  |  |
| MSMEG_6700 | K |         | -1.27 | 0.17  | regulatory protein                                    |  |  |  |  |
| MSMEG_1211 | I |         | -1.40 | -0.21 | Fatty acid desaturase                                 |  |  |  |  |
| MSMEG_0839 | R | RV0434  | -1.14 | -0.22 | ATP-dependent protease La                             |  |  |  |  |
| MSMEG_0912 | I | Rv0468  | -1.15 | 0.34  | 3-hydroxybutyryl-CoA dehydrogenase                    |  |  |  |  |
| MSMEG_0428 | R | Rv0253  | -1.40 | 0.11  | nitrite reductase [NAD(P)H] small subunit             |  |  |  |  |
| MSMEG_6780 | R |         | -1.47 | -0.19 | phenazine biosynthesis protein PhzF                   |  |  |  |  |
| MSMEG_6776 | K |         | -1.02 | -0.13 | LysR family transcriptional regulator                 |  |  |  |  |

|            |   |         |       |       |                                                  |  |  |  |  |
|------------|---|---------|-------|-------|--------------------------------------------------|--|--|--|--|
| mtnN       | F |         | -1.32 | 0.01  | MTA/SAH nucleosidase                             |  |  |  |  |
| MSMEG_5807 | P |         | -1.11 | -0.09 | D-methionine transport ATP-binding protein MetN  |  |  |  |  |
| MSMEG_3369 | G |         | -1.12 | -0.31 | transporter                                      |  |  |  |  |
| MSMEG_5479 | S | RV0991C | -1.08 | -0.58 | type I antifreeze protein                        |  |  |  |  |
| MSMEG_2039 | K |         | -1.02 | 0.03  | transcriptional regulator                        |  |  |  |  |
| MSMEG_5112 | A |         | -1.08 | 0.08  | hypothetical protein                             |  |  |  |  |
| MSMEG_6037 | R |         | -1.21 | -0.08 | 2-hydroxy-6-ketono-2,4-dienedioic acid hydrolase |  |  |  |  |
| MSMEG_5968 | R |         | -1.22 | 0.00  | polysaccharide biosynthesis protein              |  |  |  |  |
| dcd        | F | Rv0321  | -1.35 | 0.07  | deoxycytidine triphosphate deaminase             |  |  |  |  |
| MSMEG_0532 | K |         | -1.06 | -0.62 | TetR family transcriptional regulator            |  |  |  |  |
| MSMEG_5395 | T | Rv1028c | -1.31 | -0.16 | sensor protein KdpD                              |  |  |  |  |
| MSMEG_2666 | R | RV2771C | -1.99 | 0.03  | multimeric flavodoxin WrbA                       |  |  |  |  |
| MSMEG_4823 | Q |         | -1.11 | 0.29  | cytochrome p450                                  |  |  |  |  |
| MSMEG_1158 | C |         | -1.39 | -0.07 | 5-oxovalerate dehydrogenase                      |  |  |  |  |
| MSMEG_6510 | V |         | -1.10 | 0.28  | multidrug ABC transporter                        |  |  |  |  |
| MSMEG_4002 | R |         | -1.21 | -0.17 | oxidoreductase, zinc-binding dehydrogenase       |  |  |  |  |
| MSMEG_4858 | K |         | -1.08 | -0.16 | TetR family transcriptional regulator            |  |  |  |  |
| MSMEG_3513 | R | Rv2416c | -1.36 | -0.08 | hypothetical protein                             |  |  |  |  |
| MSMEG_3402 | F |         | -1.29 | 0.37  | cytosine permease                                |  |  |  |  |
| MSMEG_1975 | R |         | -1.22 | 0.04  | amidohydrolase                                   |  |  |  |  |
| MSMEG_2952 | G |         | -1.01 | -0.32 | transporter                                      |  |  |  |  |
| MSMEG_2193 | K |         | -1.35 | 0.07  | TetR family transcriptional regulator            |  |  |  |  |
| MSMEG_3398 | G |         | -1.16 | -0.01 | integral membrane transporter                    |  |  |  |  |
| MSMEG_2600 | K |         | -1.66 | -0.10 | regulatory protein                               |  |  |  |  |
| MSMEG_0196 | C |         | -1.30 | 0.32  | dehydrogenase                                    |  |  |  |  |
| MSMEG_1074 | G |         | -1.08 | -0.13 | polysaccharide deacetylase                       |  |  |  |  |
| MSMEG_3348 | G |         | -1.05 | 0.62  | extracellular solute-binding protein             |  |  |  |  |
| MSMEG_5140 | C | Rv1161  | -1.06 | -0.05 | nitrate reductase subunit alpha                  |  |  |  |  |
| MSMEG_1298 | R |         | -1.17 | -0.06 | guanine deaminase                                |  |  |  |  |
| MSMEG_4004 | R |         | -1.29 | 0.01  | 3-oxoacyl-ACP reductase                          |  |  |  |  |
| MSMEG_5778 | R |         | -1.19 | -0.13 | alcohol dehydrogenase                            |  |  |  |  |
| MSMEG_5931 | R | RV3530C | -1.05 | -0.07 | short chain dehydrogenase                        |  |  |  |  |
| MSMEG_6300 | K |         | -1.36 | 0.15  | GntR family transcriptional regulator            |  |  |  |  |
| MSMEG_5317 | A | RV0314C | -1.22 | -0.55 | hypothetical protein                             |  |  |  |  |
| MSMEG_5184 | C | Rv1143  | -1.34 | 0.09  | alpha-methylacyl-CoA racemase                    |  |  |  |  |
| MSMEG_4886 | G |         | -1.72 | -0.52 | major facilitator family protein transporter     |  |  |  |  |
| MSMEG_0469 | K |         | -1.78 | -0.33 | PadR family transcriptional regulator            |  |  |  |  |
| MSMEG_4439 | J |         | -1.38 | -0.70 | acetyltransferase                                |  |  |  |  |
| MSMEG_3823 | R |         | -1.48 | -0.14 | 3-oxoacyl-ACP reductase                          |  |  |  |  |
| MSMEG_4795 | Q |         | -1.10 | -0.23 | ABC transporter                                  |  |  |  |  |
| MSMEG_6643 | R | RV1129C | -1.13 | -0.36 | DNA-binding protein                              |  |  |  |  |
| MSMEG_3927 | C |         | -1.23 | -0.07 | peptidase M52, hydrogen uptake protein           |  |  |  |  |
| MSMEG_1351 | M | Rv3392c | -1.36 | -0.18 | cyclopropane-fatty-acyl-phospholipid synthase    |  |  |  |  |
| MSMEG_0217 | C |         | -1.14 | 0.35  | alcohol dehydrogenase                            |  |  |  |  |
| MSMEG_1100 | S |         | -1.36 | 0.31  | DGPFAETKE domain-containing protein              |  |  |  |  |
| MSMEG_2286 | R |         | -1.03 | -0.08 | aminoglycoside phosphotransferase                |  |  |  |  |
| MSMEG_0195 | P |         | -1.29 | -0.23 | steroid monooxygenase                            |  |  |  |  |
| MSMEG_5366 | G |         | -1.09 | 1.39  | hypothetical protein                             |  |  |  |  |
| MSMEG_4014 | E |         | -1.07 | 0.05  | N-carbamoyl-L-amino acid amidohydrolase          |  |  |  |  |

|            |   |        |       |       |                                                  |  |  |  |  |
|------------|---|--------|-------|-------|--------------------------------------------------|--|--|--|--|
| MSMEG_1235 | P |        | -1.02 | -0.17 | sulfate permease                                 |  |  |  |  |
| MSMEG_4005 | G |        | -1.20 | 0.00  | calcium-binding protein                          |  |  |  |  |
| MSMEG_5475 | K |        | -1.09 | -0.18 | acetate operon repressor                         |  |  |  |  |
| MSMEG_1254 | R |        | -1.10 | -0.83 | DEAD/DEAH box helicase                           |  |  |  |  |
| MSMEG_5291 | Q | Rv1058 | -1.15 | -0.14 | long-chain-fatty-acid--CoA ligase                |  |  |  |  |
| MSMEG_1745 | K |        | -1.08 | -0.41 | transcriptional regulator                        |  |  |  |  |
| MSMEG_1823 | I | RV3268 | -1.10 | 0.26  | hypothetical protein                             |  |  |  |  |
| MSMEG_4001 | G |        | -1.07 | -0.20 | ribose transporter permease RbsC                 |  |  |  |  |
| MSMEG_5950 | R |        | -1.40 | 0.14  | colanic acid biosynthesis acetyltransferase WcaF |  |  |  |  |
| MSMEG_3965 | R |        | -1.26 | -0.49 | hypothetical protein                             |  |  |  |  |
| MSMEG_0777 | C | Rv0407 | -1.09 | -0.39 | F420-dependent glucose-6-phosphate dehydrogenase |  |  |  |  |
| MSMEG_5458 | T | RV0998 | -1.03 | -0.45 | cyclic nucleotide-binding protein                |  |  |  |  |
| MSMEG_6002 | I | RV3551 | -1.23 | 0.13  | coenzyme A transferase subunit A                 |  |  |  |  |
| MSMEG_0390 | I |        | -1.15 | -0.35 | acyltransferase                                  |  |  |  |  |
| MSMEG_6716 | G |        | -1.42 | -0.43 | AP endonuclease, family protein 2                |  |  |  |  |
| ltrA       | S |        | -1.36 | -0.34 | low temperature requirement protein LtrA         |  |  |  |  |
| MSMEG_4070 | K |        | -1.21 | 0.11  | TetR family transcriptional regulator            |  |  |  |  |
| MSMEG_4006 | Q |        | -1.24 | -0.32 | CdaR family transcriptional regulator            |  |  |  |  |
| ackA       | C | Rv0409 | -1.26 | -0.49 | acetate kinase                                   |  |  |  |  |
| MSMEG_5612 | J |        | -1.49 | 0.21  | amino-acid acetyltransferase                     |  |  |  |  |
| MSMEG_0513 | S |        | -1.52 | 0.11  | integral membrane protein                        |  |  |  |  |
| MSMEG_0175 | E |        | -1.09 | -0.75 | FAD dependent oxidoreductase                     |  |  |  |  |
